# Supplementary material for: Integrated analysis of a compendium of RNA-Seq datasets for splicing factors
Source: bioRxiv preprint, doi:10.1101/2020.03.24.006791, version 1 (2020-03-25)
Supplement: Data S3 [file 006791_file09.docx]

**Data S3. Primer sequences for RT-PCR validations**

NM_001205370.1

Casc4 Sequence (5'->3') Template strand Length

>Casc4F CTTGGATCGGGAACCCAGAA Plus 20

>Casc4R ATCACTGAAGCGCTGTTTGC Minus 20

NM_001205226.1

Cnot1 Sequence (5'->3') Template strand Length

>Cnot1F AGCATTCTCTGCGTTTGTTGG Plus 21

>Cnot1R ATCATGGTAGGGTTAGCCGC Minus 20

NM_057172.3

Fubp1 Sequence (5'->3') Template strand Length

>Fubp1F GGGGGTGATGCTGGTACATC Plus 20

>Fubp1R TGGGGAGGTACTTTCTTAGCATC Minus 23

NM_001039129.4

Hnrnpa1 Sequence (5'->3') Template strand Length

>Hnrnpa1F AGTAGCTATGGCAGTGGCAGG Plus 21

>Hnrnpa1R TCTGTTGTAACCTGTAGCTTCCC Minus 23

Hnrnpa1 Sequence (5'->3') Template strand Length

>Hnrnpa1F AGTAGCTATGGCAGTGGCAGG Plus 21

>Hnrnpa1R1 TGGCCCAGAATAAAGGCTGC Minus 20

NM_001293636.1

Ktn1 Sequence (5'->3') Template strand Length

>Ktn1F GCGAAGTGTGGAGCAAGAAG Plus 20

>Ktn1R TCACGTAAGTCGATCGCTCC Minus 20

NM_026420.2

Paip2 Sequence (5'->3') Template strand Length

>Paip2F GATTCGTTGGCTACCGTCCC Plus 20

>Paip2R ATGCTTGGGCTAGTACTGCTG Minus 21

NM_018814.3

Pcnx Sequence (5'->3') Template strand Length

>PcnxF CCAAGCCAGGTTGCATTTCC Plus 20

>PcnxR CGTCTCATAGAGGGTGGACG Minus 20

uc009grj.1

Ptov Sequence (5'->3') Template strand Length

>PtovF CACAGTCCCAGACGAGGC Plus 18

>PtovR AACATACAGGGGCAAGGACC Minus 20

NM_144948.5

RbmF Sequence (5'->3') Template strand Length

>Rbm7F GGTAACCTGGAGACGAAGGTG Plus 21

>Rbm7R AAGTTCACGAATGCAAACTGC Minus 21

NM_009159.2

Srsf5 Sequence (5'->3') Template strand Length

>Srsf5F ACAGCTCCGTCGCAGACTA Plus 19

>Srsf5R TGAACACTCGACAGCCACTC Minus 20

NM_001122730.2

Tnrc18 Sequence (5'->3') Template strand Length

>Tnrc18F TTGGTCAAGCTCCAGAGACG Plus 20

>Tnrc18R GATGAGGAGTCGTGATCGTCC Minus 21
