# Supplementary material for: Integrated analysis of a compendium of RNA-Seq datasets for splicing factors
Source: bioRxiv preprint, doi:10.1101/2020.03.24.006791, version 1 (2020-03-25)
Supplement: Table S5 [file 006791_file13.xlsx]

## Sheet: BAT
Table S5. DAS events in cold exposed BAT and sWAT.
The column format is same as Table S1.
event_id	event_type	path1	path2	logoddsBN	logoddsBC	logoddsratio	pvalue	qvalue	PSI_BN	PSI_BC	delta_PSI
uc007nxm.1,uc007nxn.1,uc007nxo.1,uc007nxp.1,uc007nxq.1,uc007nxr.1,uc007nxs.1,uc007nxt.1,uc011ynv.1,uc011ynw.1,uc011ynx.1:chr12:+:76919304:77211915:Syne2,mKIAA1011::107-108-109-110-111-112-113	AFE	E106,E107	E35,E36,E37,E38,E39,E40,E41,E42,E43,E44,E45,E46,E47,E48,E49,E50,E51,E52,E53,E54,E55,E56,E57,E58,E59,E60,E61,E62,E63,E64,E65,E66,E67,E68,E69,E70,E71,E72,E73,E74,E75,E76,E77,E78,E79,E80,E81,E82,E83,E84,E85,E86,E87,E88,E89,E90,E91,E92,E93,E94,E95,E96,E97,E98,E99,E100,E101,E102,E103,E104,E105,E107	-5.17239	-1.03319	4.1392	1.08021e-16	8.29168e-13	0.718449	0.0110021	-0.707447
uc009kcf.1,uc009kcg.1,uc009kch.1,uc009kci.1,uc009kcj.1,uc009kck.1,uc009kcl.1:chr7:-:139903766:140005569:Fam53b::7	AFE	E5,E7	E6,E7	1.20037	-1.00423	-2.20461	7.45881e-14	2.86269e-10	0.329849	0.809646	0.479797
uc008wfb.1,uc008wfc.1,uc008wfd.1,uc008wfe.1,uc012dra.1:chr4:+:155221520:155233412:Dvl1:8-9-10:12	IR	E10,E12	E10,E11,E12	-0.416205	1.42412	1.84032	1.91916e-13	4.91049e-10	0.539902	0.144623	-0.395279
uc009dks.2,uc009dkt.2,uc009dku.2:chr6:+:117118552:117131386:Cxcl12:<1-2-3:	ALE	E3,E4	E3,E5,E6	1.51086	-0.947083	-2.45794	5.78875e-13	1.11086e-09	0.938573	0.576866	-0.361707
uc009jsx.1,uc009jsy.2,uc009jsz.2,uc012ftv.1:chr7:+:133956196:133973733:Fam57b:8:12-13-14-15>	ES	E8,E10,E12	E8,E12	2.10187	-0.0494359	-2.1513	1.91906e-12	2.12522e-09	0.648195	0.16865	-0.479545
uc009kvh.2,uc009kvi.2,uc009kvj.2,uc012fzj.1:chr8:-:11514016:11550771:Cars2::8	AFE	E1,E2,E3,E4,E5,E6,E8	E7,E8	2.75751	-0.688926	-3.44644	1.68695e-12	2.12522e-09	0.781152	0.100597	-0.680555
uc012akg.1,uc012akh.1:chr17:-:13081767:13102866:Pnldc1:<12:14-15-16-17-18.19-20-21>	ES	E12,E14	E12,E13,E14	-2.79439	-0.216462	2.57793	1.93806e-12	2.12522e-09	0.938434	0.515509	-0.422925
uc007hnb.1,uc007hnc.1,uc007hnd.1:chr10:-:127927916:127930881:Myl6:<1-2-3-4-5:9>	ES	E5,E9	E5,E7,E9	-0.46941	0.252191	0.7216	8.87752e-12	7.76466e-09	0.578536	0.416113	-0.162422
uc007ynx.1,uc007yny.1,uc007ynz.1,uc012acg.1:chr16:+:18426509:18479166:TXNRD2,Txnrd2:<1-3-4-5:	ALE	E5,E6	E5,E7,E8,E9,E10,E11,E12,E13,E15,E16	-1.0177	-3.37118	-2.35348	9.29889e-12	7.76466e-09	0.621486	0.102403	-0.519083
uc009psf.2,uc009psg.2,uc009psh.2,uc009psi.2,uc012gtr.1:chr9:-:55068028:55131432:Nrg4:13:15>	ES	E13,E15	E13,E14,E15	0.314587	1.53711	1.22252	1.01155e-11	7.76466e-09	0.109967	0.0323119	-0.0776552
uc007wkm.1,uc007wkn.1:chr15:-:76332444:76342248:Dgat,Dgat1:15:17-18-19-20>	IR	E15,E17	E15,E16,E17	1.05149	2.09813	1.04664	1.13623e-11	7.92883e-09	0.214143	0.0866849	-0.127458
uc009nfl.1,uc009nfm.1,uc009nfn.1,uc009nfo.1:chr8:+:108692774:108722604:Slc7a6:8-9:11-12-13-14-15-16.17>	IR	E9,E10,E11	E9,E11	0.133303	-1.84123	-1.97453	1.25253e-11	8.012e-09	0.25365	0.0377107	-0.215939
uc007gaw.1,uc007gax.1,uc007gay.1,uc011xik.1:chr10:-:79439864:79447075:ORF61,mFLJ00277:<1-2-3-4-5-6-7:9-11.12	IR	E7,E9	E7,E8,E9	0.642635	2.10241	1.45977	1.91953e-11	1.13341e-08	0.293757	0.0850438	-0.208714
uc007mnd.2,uc007mne.2,uc007mnf.2,uc007mng.2:chr11:+:117060974:117223639:Sept9::4	AFE	E1,E2,E4	E3,E4	0.382992	2.61723	2.23423	3.7081e-11	1.99413e-08	0.720684	0.967701	0.247017
uc008awg.2,uc008awh.2,uc008awi.2,uc008awj.2:chr17:-:24610495:24616023:Mlst8:<1.2:6-7-8-9-10-11-12-13>	A3SS	E2,E6	E2,E5,E6	-1.26943	0.584934	1.85436	3.89682e-11	1.99413e-08	0.77015	0.344234	-0.425916
uc007bln.1,uc007blo.1,uc007blp.1:chr1:+:74283091:74314787:Arpc2:<1.2:4.5-7-8-9-10-11-12-13-14-15>	IR	E2,E4	E2,E3,E4	0.307611	-1.57016	-1.87777	2.96317e-10	1.26363e-07	0.312832	0.746213	0.433381
uc007cym.1,uc007cyn.1,uc007cyo.1,uc007cyp.1:chr1:+:153191627:153211575:Ivns1abp:<1-2-3-4-5-6-7:9	A3SS	E7,E9	E7,E8,E9	-0.127031	1.79773	1.92476	2.89651e-10	1.26363e-07	0.2575	0.022657	-0.234843
uc007vcb.1,uc007vcc.1,uc007vcd.1,uc007vce.1:chr15:-:3267759:3533230:Ghr:<1-4-5-6-7-8-9-10:	ALE	E10,E11	E10,E12,E13,E14	1.48375	-0.36326	-1.84701	2.87196e-10	1.26363e-07	0.988821	0.930883	-0.0579376
uc007nyi.2,uc007nyj.2,uc007nyk.2,uc007nym.1,uc007nyn.2,uc011yod.1:chr12:+:77634546:77680026:Plekhg3::20	AFE	E1,E2,E3,E5,E6,E7,E8,E9,E10,E11,E12,E14,E20	E17,E18,E19,E20	-0.235684	1.57904	1.81473	1.17155e-09	4.73308e-07	0.51372	0.239138	-0.274582
uc009nus.2,uc009nut.2,uc009nuu.2,uc009nuv.2,uc009nuw.2,uc009nux.2,uc009nuy.1,uc009nuz.2:chr8:-:125766255:125778075:1300018I17Rik:4-5-7-8:10	IR	E8,E10	E8,E9,E10	0.126294	2.26176	2.13547	1.54407e-09	5.92615e-07	0.262792	0.0437911	-0.219001
uc008iya.1,uc008iyb.1,uc008iyc.1,uc008iyd.1:chr2:+:28048612:28086256:Olfm1:3-4:	ALE	E4,E5	E4,E6,E7,E8	-0.594969	-20	-19.405	2.18536e-09	7.62492e-07	0.763747	0	-0.763747
uc008gnv.1,uc008gnw.1,uc008gnx.1,uc008gny.1,uc012bif.1,uc012big.1:chr19:+:8972600:8991155:Ganab,mKIAA0088:7.8:10-11-12-13-14-15-16-17-18-20	IR	E8,E10	E8,E9,E10	-1.1314	0.419451	1.55085	2.34934e-09	7.84066e-07	0.489335	0.141896	-0.347439
uc007wkm.1,uc007wkn.1:chr15:-:76332444:76342248:Dgat,Dgat1:<1-2-3-4-5-6-7-8-9-10-11-12.13:15	IR	E13,E15	E13,E14,E15	1.77099	3.04942	1.27843	2.58818e-09	8.27786e-07	0.111149	0.0293916	-0.081757
uc007dpl.2,uc007dpn.2,uc007dpo.1,uc007dpp.2:chr1:+:174012659:174052463:Copa:<1-2-3-4-5:7-9-10-11-12-13-14-15-16-17-18-19-20-21-22-23-26	IR	E5,E7	E5,E6,E7	0.522148	3.518	2.99585	3.07079e-09	9.23648e-07	0.125117	0.00480538	-0.120311
uc008cek.2,uc008cel.2,uc008cem.2:chr17:-:35087180:35089416:1110038B12Rik:<1-2-3:6>	ES	E3,E6	E3,E5,E6	-1.71669	0.350839	2.06753	3.3687e-09	9.57709e-07	0.776103	0.369534	-0.406569
uc008kcz.2,uc008kda.2,uc008kdb.2,uc009vcb.2,uc009vcc.2,uc009vcd.2:chr2:-:73448716:73613403:Chn1::8-9-13-14-15-16-17>	AFE	E2,E3,E4,E5,E6,E8	E7,E8	-0.150675	2.36386	2.51454	5.2456e-09	1.43804e-06	0.554608	0.935986	0.381378
uc007wlr.1,uc007wls.1:chr15:+:76527193:76530105:Gpt:16:18	IR	E16,E18	E16,E17,E18	1.56862	3.10744	1.53882	1.01731e-08	2.61824e-06	0.153939	0.0219044	-0.132034
uc009ttn.1,uc012hmf.1:chrX:-:91780812:91787413:Maged1,mFLJ00163:<1-2-3-4-5-6-7:9-10-11-13-14-15>	IR	E7,E9	E7,E8,E9	0.759653	2.18236	1.42271	1.02328e-08	2.61824e-06	0.206441	0.0495339	-0.156907
uc009che.1,uc009chf.1,uc009chg.1,uc009chh.1,uc009chi.1,uc009chj.1,uc009chk.1,uc009chl.1,uc009chm.1,uc009chn.1,uc009cho.1,uc012eng.1:chr6:+:71781324:71827382:Immt:7:11-12-13-14	ES	E7,E11	E7,E9,E11	-0.0706579	0.732449	0.803107	1.25524e-08	3.10814e-06	0.425933	0.253644	-0.172289
uc007azw.1,uc007azx.1,uc007azy.1:chr1:-:55042012:55084322:Sf3b1:<1-2-3-4:6-7-8-9-10-11-12-13-14-15-16-17-18-19-20-21-22-23-25-26-27>	IR	E4,E6	E4,E5,E6	-0.963826	1.01222	1.97605	1.3513e-08	3.24143e-06	0.325266	0.0309652	-0.2943
uc009pgp.1,uc009pgq.1,uc009pgr.1,uc012gsj.1:chr9:+:45714651:45737805:Pcsk7:16-17:19-20-21>	ES	E17,E19	E17,E18,E19	0.663784	2.48765	1.82387	1.57207e-08	3.65673e-06	0.284486	0.0549978	-0.229488
uc008ihm.2,uc008ihn.2:chr2:-:9977658:10002137:Atp5c1:<1-3-4-5-6-7-8-9:11>	ES	E9,E10,E11	E9,E11	-0.987168	0.140696	1.12786	2.03542e-08	4.59525e-06	0.245536	0.498946	0.25341
uc008jzn.2,uc008jzo.2,uc008jzp.2,uc008jzq.1,uc008jzr.1,uc008jzs.2:chr2:+:70499565:70529782:Gorasp2:<1:4-5-6-7-8-9-11-12-14>	ES	E1,E4	E1,E2,E4	1.79374	-0.467617	-2.26135	2.12962e-08	4.67057e-06	0.0828771	0.475034	0.392157
uc007hoq.2,uc007hor.2,uc007hos.2,uc011xqk.1:chr10:+:128258826:128314694:1110005A23Rik,Sarnp:<1:3	ES	E1,E3	E1,E2,E3	1.39916	2.39231	0.993149	2.87513e-08	6.13042e-06	0.188349	0.0655324	-0.122817
uc007qts.2,uc007qtt.1,uc007qtu.1,uc007qtv.1,uc007qtw.1,uc007qtx.1,uc007qty.1,uc007qtz.1:chr13:-:58492599:58504704:Hnrnpk,Hnrpk::9	AFE	E5,E6,E7,E9	E8,E9	0.472514	1.90676	1.43425	3.0507e-08	6.32897e-06	0.614369	0.874566	0.260197
uc007jem.2,uc007jen.2,uc007jeo.2,uc007jep.2,uc007jer.2,uc007jes.2,uc007jet.2,uc011xvo.1:chr11:+:59475996:59594362:Mprip:<1-2-3-4-5-6.7-8:10-11-12-14.15-16-17-18-19	A5SS	E8,E10	E8,E9,E10	-1.42504	0.370537	1.79558	4.20019e-08	8.35336e-06	0.652901	0.210556	-0.442344
uc008pul.1,uc008pum.1,uc008pun.1,uc008puo.1:chr3:+:88101056:88125688:Cct3:<1-2-3:5-6-7-8-9-10-11-13-14-15-17.18>	IR	E3,E5	E3,E4,E5	1.51474	3.42747	1.91273	4.35298e-08	8.35336e-06	0.154599	0.0152363	-0.139363
uc009rvm.2,uc009rvn.2,uc009rvo.2:chr9:+:111020614:111128172:Lrrfip2:<1-2-3-4:6-7-8-9-10	ES	E4,E6	E4,E5,E6	3.19915	1.40627	-1.79287	4.28667e-08	8.35336e-06	0.0364257	0.172502	0.136076
uc007llz.2,uc007lma.2,uc007lmb.2,uc007lmc.2,uc007lmd.2,uc011yfd.1:chr11:-:100566059:100573781:Kat2a:<1-2-3-4-5-6:8-9.10	A5SS	E6,E8	E6,E7,E8	-1.03416	1.77407	2.80824	4.92599e-08	9.22241e-06	0.567977	0.0910549	-0.476922
uc008wfb.1,uc008wfc.1,uc008wfd.1,uc008wfe.1,uc012dra.1:chr4:+:155221520:155233412:Dvl1:12:14-15-16-17-18-19-20	IR	E12,E14	E12,E13,E14	-0.467804	1.1155	1.5833	5.83424e-08	1.04148e-05	0.529919	0.167244	-0.362675
uc008fpo.1,uc008fpp.1,uc008fpr.1,uc008fps.1:chr18:+:74602272:74931131:Myo5b::32	AFE	E1,E2,E3,E4,E5,E6,E7,E8,E9,E10,E11,E12,E14,E15,E16,E17,E18,E19,E20,E21,E22,E23,E24,E25,E26,E27,E28,E29,E30,E32	E31,E32	-1.12607	0.650687	1.77676	7.17292e-08	1.25135e-05	0.180805	0.603057	0.422252
uc009oqh.2,uc009oqi.1:chr9:+:26837759:26902900:Ncapd3::27-28-29-30-31-32-33-34-35-36-37>	AFE	E26,E27	E3,E4,E5,E6,E7,E8,E9,E10,E11,E12,E13,E14,E15,E16,E17,E18,E19,E20,E21,E22,E23,E24,E25,E27	0.423695	-1.27587	-1.69957	9.52382e-08	1.62455e-05	0.0280542	0.140073	0.112019
uc007rfk.1,uc007rfl.1,uc007rfm.1,uc007rfn.1,uc007rfo.1,uc007rfp.1,uc007rfq.1,uc011zbx.1:chr13:-:74831733:74946208:Cast::6	AFE	E3,E4,E6	E5,E6	-0.45213	-1.55801	-1.10588	9.84755e-08	1.64326e-05	0.331103	0.122416	-0.208687
uc009fyx.1,uc009fyy.1,uc009fyz.1:chr7:+:29222465:29231914:Gmfg::3-4-6-7-8-9>	AFE	E1,E3	E2,E3	-3.73767	1.11436	4.85203	1.05544e-07	1.72374e-05	0.965089	0.280792	-0.684297
uc009ibj.2,uc009ibk.2,uc009ibl.2,uc012fns.1:chr7:-:88035608:88046155:Wdr73:<1:3-4	IR	E1,E3	E1,E2,E3	0.0227283	1.64021	1.61748	1.09251e-07	1.74711e-05	0.29796	0.0603023	-0.237657
uc007yli.2,uc012abt.1,uc012abu.1:chr16:+:17561977:17577893:P2rx6,mP2XM:7:9-10-11-12.13>	ES	E7,E9	E7,E8,E9	-0.526742	-2.84195	-2.31521	1.29941e-07	2.03557e-05	0.554425	0.922849	0.368424
uc008dqe.1,uc008dqf.1,uc008dqg.1,uc008dqh.1:chr17:-:80247731:80295463:Atl2::16.17>	AFE	E1,E2,E4,E5,E6,E7,E8,E9,E10,E11,E12,E13,E16	E15,E16	1.7345	3.54248	1.80798	1.42502e-07	2.18769e-05	0.629557	0.919772	0.290215
uc008goj.1,uc008gok.1,uc008gol.1,uc012bii.1:chr19:+:9063773:9151409:Ahnak:6:9>	ES	E6,E9	E6,E7,E9	0.91566	-0.671808	-1.58747	1.50988e-07	2.27252e-05	0.227079	0.588794	0.361715
uc008tfz.1,uc012dfx.1,uc012dfy.1:chr4:+:63017195:63020545:Orm3:5.6:8	ES	E6,E8	E6,E7,E8	-3.18938	-0.885462	2.30392	1.56845e-07	2.31528e-05	0.953483	0.626417	-0.327066
uc008rdi.1,uc008rdj.2,uc008rdk.2,uc008rdl.2,uc008rdm.2:chr3:-:119421463:119486306:Ptbp2:5-6-7-8-11-12:14-15-16	ES	E12,E14	E12,E13,E14	0.207771	-2.41406	-2.62183	1.83564e-07	2.65856e-05	0.43603	0.913332	0.477302
uc007syj.1,uc007syk.1,uc007syl.1,uc007sym.1:chr14:+:32973077:32992549:Ncoa4::4-5-7-8-9-10-11-12.13-14>	AFE	E1,E4	E3,E4	3.48431	1.786	-1.69832	2.34401e-07	3.33197e-05	0.117338	0.400856	0.283518
uc008cgb.1,uc008cgc.1,uc008cgd.1,uc008cge.1,uc008cgf.1,uc008cgg.1,uc008cgh.1:chr17:+:35272186:35284181:Bat3:9-10-11-12-13-14:16	ES	E14,E16	E14,E15,E16	0.139637	-1.0683	-1.20794	2.69185e-07	3.68976e-05	0.39201	0.660902	0.268891
uc009num.1,uc009nun.2,uc009nuo.2,uc012gmo.1:chr8:+:125748740:125756156:Cdk10:<1:3-4-5-6-8-9-10-11-12-13-14-15>	A5SS	E1,E3	E1,E2,E3	-1.474	-4.15261	-2.67861	2.6646e-07	3.68976e-05	0.805	0.981955	0.176956
uc008jpt.2,uc008jpu.2,uc008jpv.1,uc012bve.1:chr2:+:48805027:49173594:Mbd5:13:15	A5SS	E13,E15	E13,E14,E15	0.0697958	-2.23001	-2.29981	2.77519e-07	3.73726e-05	0.221923	0.64782	0.425897
uc007yrw.2,uc007yrx.2,uc007yry.2,uc012adm.1:chr16:+:22009556:22049342:Senp2::13-14-15-16-17-18-19>	AFE	E12,E13	E1,E2,E4,E5,E6,E7,E8,E9,E10,E11,E13	-0.40417	-1.96564	-1.56147	2.82656e-07	3.7408e-05	0.544999	0.864721	0.319722
uc007qaw.1,uc007qax.1,uc007qay.1:chr13:+:34094265:34127039:Ripk1:<1-3-4-5:7-8-9-10-11-12-13>	A5SS	E5,E7	E5,E6,E7	0.753045	2.29051	1.53747	3.75296e-07	4.62446e-05	0.0763795	0.0151498	-0.0612297
uc007xzy.1,uc007yaa.1,uc012aas.1:chr16:-:4626883:4679720:Coro7::13-14-15-16-17-18-19-20-21-22-23-24-25-26-27-28-29-30-31>	AFE	E11,E13	E1,E2,E3,E4,E5,E6,E7,E9,E10,E13	-1.71704	-20	-18.283	3.78941e-07	4.62446e-05	0.490155	1	0.509845
uc008vvx.1,uc008vvy.1,uc008vvz.1,uc008vwa.1,uc008vwb.1,uc012dpq.1:chr4:-:148550429:148681807:KIF1B,Kif1b:18-19-20-21-22-23-24-25:	ALE	E25,E26	E25,E27,E28,E29,E30	-0.52374	-1.96996	-1.44622	3.73154e-07	4.62446e-05	0.067892	0.0155883	-0.0523038
uc008ggm.2,uc008ggn.2,uc008ggo.1,uc008ggp.1:chr19:+:6046575:6053718:Syvn1:14-16-17-18:20.21>	IR	E18,E20	E18,E19,E20	-1.00602	1.03427	2.04029	3.91977e-07	4.70127e-05	0.680763	0.213144	-0.467618
uc007odc.1,uc007odd.1,uc007ode.1:chr12:-:84314737:84828658:Dpf3:<1-2-3-4.5-6-7-8-9:	ALE	E9,E10	E9,E11,E12,E13	1.7603	-0.538027	-2.29833	4.13279e-07	4.8805e-05	0.958472	0.747095	-0.211378
uc008ayt.2,uc008ayu.1,uc008ayw.2,uc008ayx.2,uc008aza.2,uc008azb.2,uc008azc.2,uc008azd.2,uc008aze.2,uc008azf.2,uc008azg.1,uc008azh.2,uc012amv.1:chr17:-:25025430:25073922:Eme2,Jsap1,Mapk8ip3:11-12-13-14-16-17-18:20-21-22-23-24-25-26-27-28-29-30-31-32-33-34-35-36-37-38.39>	A5SS	E18,E20	E18,E19,E20	-0.988936	-2.32173	-1.33279	4.35653e-07	5.06678e-05	0.706327	0.904244	0.197917
uc008zxs.1,uc008zxt.1,uc012eek.1,uc012eel.1:chr5:+:135582782:135613792:Mlxipl,Wbscr14:8-9-10-11:13-14-15-16	A3SS	E11,E13	E11,E12,E13	1.1933	2.38382	1.19052	4.81267e-07	5.51374e-05	0.212963	0.0667863	-0.146176
uc007fxm.1,uc007fxn.1:chr10:-:77649470:77707387:Trappc10:13-14-15:17-19-20-21-22-23-24-25-26>	IR	E15,E17	E15,E16,E17	0.70187	2.60372	1.90185	4.89621e-07	5.52695e-05	0.116136	0.0167209	-0.099415
uc009fzt.2,uc009fzu.2,uc012fgx.1:chr7:+:29551770:29573684:Sirt2:<1:3-4-5-6-7-8-9-10-11-12-13-14-15-16>	ES	E1,E3	E1,E2,E3	1.72716	0.963564	-0.763592	6.46899e-07	7.19652e-05	0.134048	0.253869	0.119821
uc007bcm.2,uc011wll.1,uc011wlm.1:chr1:-:58714963:58752833:Als2cr12:7-8:10-11-12-13-14-15-16.17.18>	ES	E8,E10	E8,E9,E10	-1.98328	-0.180859	1.80242	6.65179e-07	7.29416e-05	0.855449	0.47425	-0.381199
uc008atn.1,uc008ato.1,uc008atp.1,uc008atq.1:chr17:+:23940153:23961710:Srrm2:11-12:14.15-16-17-18>	A3SS	E12,E14	E12,E13,E14	-0.352842	1.12536	1.4782	7.05941e-07	7.63212e-05	0.369123	0.0860334	-0.28309
uc007qix.1,uc007qiy.1:chr13:-:49298319:49311395:1110007C09Rik::3	AFE	E1,E3	E2,E3	-0.255933	-2.31279	-2.05686	7.39815e-07	7.88725e-05	0.535927	0.905673	0.369746
uc009kqh.1,uc009kqi.1:chr7:-:151621628:151656646:Cttn:<1-2-3-4-5-6-7-8-9-10:12-13-14-15-16-17-18>	ES	E10,E12	E10,E11,E12	-0.314492	0.67764	0.992132	8.44592e-07	8.88095e-05	0.492298	0.254796	-0.237502
uc008pvg.2,uc008pvh.2,uc008pvi.2,uc012crv.1,uc012crw.1:chr3:-:88239883:88265104:Sema4a:6-7-8-9:11-12-13-14-15-16-17-18-19-20>	A3SS	E9,E10,E11	E9,E11	0.0139862	-1.74047	-1.75445	8.83088e-07	9.03811e-05	0.436751	0.128278	-0.308473
uc008qvo.1,uc008qvp.1:chr3:+:105762415:105772678:Wdr77:<1-2-3-4-5-6-7-8:10-11>	IR	E8,E10	E8,E9,E10	1.18163	2.63007	1.44844	8.81184e-07	9.03811e-05	0.105531	0.0213551	-0.0841757
uc008xbt.1,uc008xbu.1,uc008xbv.1,uc008xbw.1,uc012dux.1:chr5:-:34349846:34512097:Haus3,Poln:<22:24-25	ES	E22,E24	E22,E23,E24	-1.53075	0.357464	1.88821	9.20777e-07	9.29985e-05	0.797322	0.353299	-0.444023
uc009eup.1,uc009euq.1,uc009eur.1,uc009eus.1:chr7:+:3289038:3299350:Myadm:<3:6-7>	A5SS	E3,E6	E3,E4,E6	-0.346069	0.71203	1.0581	1.02228e-06	0.000101909	0.467601	0.231429	-0.236172
uc007znb.1,uc007znd.1:chr16:-:57168976:57231579:Tbc1d23:<1-2-3-4-5:	ALE	E5,E6	E5,E7,E8,E9,E10,E11,E12,E13,E14,E15,E16,E17,E18,E19	-0.0577479	-2.21525	-2.1575	1.07852e-06	0.000106137	0.903077	0.572069	-0.331008
uc009uox.2,uc009uoy.2,uc012hqq.1:chrX:-:147521636:147531086:Tsr2:3-4:6>	A5SS	E4,E6	E4,E5,E6	1.59722	0.243275	-1.35395	1.13684e-06	0.00011046	0.153129	0.427867	0.274738
uc009soj.2,uc009sok.2,uc009sol.2,uc009som.2,uc009son.2,uc012heo.1:chrX:-:7770975:7783651:Mporc-b,Porcn:<1-2-3.4-5-6-7:10-11-12-13-14	ES	E7,E10	E7,E8,E9,E10	0.692241	-1.16664	-1.85888	1.26094e-06	0.000120987	0.286764	0.74299	0.456226
uc009kti.2,uc009ktj.2,uc009ktk.2,uc009ktm.2,uc009ktn.2:chr8:+:4238739:4247897:Map2k7:5-6-7-8-9-10-11-12-13-14:16>	IR	E14,E16	E14,E15,E16	-1.21566	-3.25081	-2.03515	1.3315e-06	0.00012618	0.309818	0.815039	0.50522
uc007cte.1,uc007ctf.1,uc011wsj.1,uc011wsk.1:chr1:-:137278891:137327068:Importin9,Ipo9:<1:3-4-5-6-7-8-9-10-11-12-13-14-15-16-19-20-21-22-23-24-25-26-27>	ES	E1,E3	E1,E2,E3	0.633309	2.39773	1.76442	1.44309e-06	0.000133459	0.291705	0.0571994	-0.234506
uc008tfd.1,uc008tfe.1,uc008tfg.1,uc008tfh.2,uc008tfi.2,uc008tfj.1,uc008tfk.2,uc008tfl.2,uc012dfu.1,uc012dfv.1:chr4:+:62220880:62364053:Rgs3::34-35>	AFE	E31,E32,E34	E33,E34	2.87707	1.61627	-1.26081	1.51994e-06	0.000135988	0.740329	0.447077	-0.293252
uc007lrb.1,uc007lrc.1,uc007lrd.1:chr11:+:102146274:102150738:Tmub2:<1:4-5>	ES	E1,E4	E1,E3	-1.35161	0.707536	2.05914	1.5618e-06	0.000136531	0.782053	0.289378	-0.492675
uc007til.1,uc007tim.1,uc007tin.1,uc007tio.1,uc007tip.1,uc007tiq.1,uc007tir.1,uc007tis.1,uc007tit.1,uc007tiu.1,uc007tiv.1,uc007tiw.1,uc007tix.1,uc007tiy.1,uc007tiz.1,uc007tja.1,uc007tjb.1,uc007tjc.1,uc007tjd.1,uc007tje.1,uc007tjf.1,uc011zjp.1:chr14:+:48268985:48356239:KNT,Ktn1:36.37-38-39-40:42	ES	E40,E42	E40,E41,E42	-0.599054	0.6673	1.26635	1.58629e-06	0.000136531	0.599248	0.291109	-0.308139
uc008gjk.2,uc008gjl.1,uc008gjm.1,uc012bhq.1:chr19:-:7012559:7016940:Gpr137:<2.3:7	IR	E3,E7	E6,E7	-0.554968	1.48457	2.03954	1.62911e-06	0.000136531	0.373513	0.0827251	-0.290788
uc008hom.1,uc008hon.1,uc008hoo.1,uc008hop.1:chr19:-:43738291:43749371:Slc25a28:<1-2:5	IR	E2,E5	E2,E3,E4,E5	0.587028	1.85127	1.26424	1.58129e-06	0.000136531	0.101459	0.0279853	-0.0734735
uc009igp.1,uc009igq.1,uc009igr.1,uc009igs.1,uc009igt.1,uc009igu.1,uc009igv.1,uc009igw.1:chr7:+:97278741:97357442:Picalm,mKIAA4114:<1-2-4-6-7-8-9-10-11-12-13-14:16	ES	E14,E16	E14,E15,E16	1.52927	0.65253	-0.876744	1.63638e-06	0.000136531	0.119886	0.249863	0.129978
uc009mav.1,uc009maw.1:chr8:+:73118379:73121189:Isyna1:<1-2-3-4:6-7-8-9-10-11-12>	IR	E4,E6	E4,E5,E6	-0.0568386	1.97346	2.0303	1.66543e-06	0.000137461	0.430055	0.0596505	-0.370405
uc007wxh.2,uc007wxi.2,uc007wxj.2,uc007wxk.2,uc007wxl.1:chr15:+:81633102:81657293:Tef::4	AFE	E1,E4	E3,E4	-0.0873751	-1.60978	-1.52241	1.84985e-06	0.000149468	0.430856	0.777074	0.346218
uc008hwo.1,uc008hwp.1,uc008hwq.1,uc008hwr.1,uc012bni.1:chr19:+:53384995:53450300:Mxi1::6-8-9-10-11>	AFE	E1,E6	E3,E6	-1.2608	0.347553	1.60836	1.83263e-06	0.000149468	0.870929	0.491904	-0.379025
uc008doq.1,uc008dor.1:chr17:-:75936425:75951286:Fam98a:<1-2-3-4-5-6-7:9>	IR	E7,E9	E7,E8,E9	0.220677	2.11323	1.89256	1.89093e-06	0.000150198	0.360557	0.0793568	-0.2812
uc007lth.1,uc007lti.1,uc007ltj.1,uc007ltk.1,uc007ltl.1,uc007ltm.1,uc007ltn.1:chr11:+:102963001:102973513:Acbd4:6:8-9-11-12-13-14	ES	E6,E8	E6,E7,E8	-2.47378	-1.15843	1.31535	2.01157e-06	0.000157559	0.912693	0.708717	-0.203976
uc008hup.1,uc008huq.1,uc012bnd.1:chr19:+:47165255:47205635:Pdcd11,mKIAA0185:<1-2-3-4-5-6-7-8-9-10-11-12-13-14-15-16-17-18-19-20-21-22-23-24:26-27-28-29-30-31-32-33	IR	E24,E26	E24,E25,E26	-1.04265	0.485508	1.52816	2.12474e-06	0.000164743	0.559088	0.203517	-0.355571
uc008ljo.2,uc012cao.1:chr2:+:103935957:103955508:Cd59a:<1:3-4-5>	ES	E1,E3	E1,E2,E3	3.34134	2.21797	-1.12337	2.36643e-06	0.000181647	0.0211173	0.0715357	0.0504184
uc007vah.2,uc007vai.1,uc007vaj.1,uc007vak.1,uc007val.1,uc011zqg.1,uc011zqh.1,uc011zqi.1:chr14:-:121941260:122196956:Dock9:46-47-48-49-50-51:53-54-55-58-59-60-61-62-64	ES	E51,E53	E51,E52,E53	1.19123	2.59671	1.40549	2.41511e-06	0.000183549	0.178242	0.055428	-0.122814
uc008iir.1,uc008iis.1,uc008iit.1,uc008iiu.1,uc008iiv.1,uc008iiw.1,uc008iix.1,uc008iiy.1,uc008iiz.1,uc008ija.1,uc008ijb.1,uc012bqt.1:chr2:+:11627162:11655589:IL15ra,Il15ra:4:6	IR	E4,E6	E4,E5,E6	0.23949	1.20023	0.960736	2.4771e-06	0.000186414	0.115776	0.0373214	-0.0784549
uc008cdv.1,uc008cdw.1,uc008cdx.1:chr17:+:34987335:34993317:Rdbp:2:4-5-6-7-8-9-10-11-12-13>	A5SS	E2,E4	E2,E3,E4	1.3239	-0.699625	-2.02353	2.63612e-06	0.000196455	0.169216	0.627076	0.457861
uc008gth.2,uc008gti.2:chr19:+:11986888:12019586:Patl1:<1-2-3-4-5:7-8-9-10-11-12-13-14-15-16-17-18-19-20>	ES	E5,E7	E5,E6,E7	-0.297759	0.898559	1.19632	3.05938e-06	0.000225806	0.523849	0.232428	-0.291421
uc009str.1,uc009sts.2,uc009stt.2,uc009stu.2,uc009stv.1:chrX:+:20374939:20437647:Araf:<2-3-4-5-6-7:	ALE	E7,E8	E7,E9,E10	0.410084	-0.305234	-0.715317	3.10377e-06	0.0002269	0.228282	0.126691	-0.101592
uc008bsg.2,uc008bsh.1,uc012aom.1:chr17:+:29227930:29237667:Cdkn1a::4-5>	AFE	E2,E4	E3,E4	1.86845	4.30744	2.43899	3.33962e-06	0.000241839	0.0669694	0.0101589	-0.0568105
uc009ukz.1,uc009ula.1,uc009ulb.1,uc009ulc.1:chrX:-:137074067:137135061:Tilz3b,Tsc22d3::5-7.8>	AFE	E1,E2,E5	E3,E5	-1.35221	-0.113024	1.23918	3.40511e-06	0.000244277	0.144696	0.353943	0.209248
uc009qvg.2,uc009qvh.1,uc012gxi.1:chr9:+:80012840:80159536:Myo6:29-30:32-33	ES	E30,E32	E30,E31,E32	-20	-1.28704	18.713	3.47519e-06	0.000246996	1	0.768734	-0.231266
uc008cds.1,uc008cdt.1,uc008cdu.1,uc012aqp.1:chr17:-:34976170:34987149:Skiv2l:16-17:19-20-21-22-23-24-25-26-27-28-29-30-31-32>	IR	E17,E19	E17,E18,E19	-0.58152	0.610901	1.19242	3.57266e-06	0.000251594	0.474111	0.205491	-0.26862
uc008xbt.1,uc008xbu.1,uc008xbv.1,uc008xbw.1,uc012dux.1:chr5:-:34349846:34512097:Haus3,Poln:<22:26	ES	E22,E26	E22,E24	2.21641	0.282716	-1.9337	3.68688e-06	0.000256186	0.0617663	0.300747	0.238981
uc009dtd.1,uc009dte.1,uc009dtf.1,uc009dtg.1,uc009dth.1,uc009dti.2:chr6:+:124989865:125013283:Acrbp,Ing4:7-8.9-10-11-12-13-14-16:	ALE	E16,E17	E16,E18,E19,E20	0.838153	-0.843844	-1.682	3.70462e-06	0.000256186	0.810848	0.469099	-0.341748
uc007jad.1:chr11:-:57609000:57614919:AK007998:2:4>	ES	E2,E4	E2,E3	-1.04304	0.713766	1.75681	3.96439e-06	0.000271417	0.640572	0.227605	-0.412966
uc007mrk.1,uc007mrl.2,uc007mrm.2,uc007mrn.2,uc007mro.2:chr11:-:119868631:119908459:Aatk:<3-4-5-7-8-9-10-11-12-13-14.15-16-17:19>	IR	E17,E19	E17,E18,E19	-1.53687	-0.0930904	1.44378	3.99559e-06	0.000271417	0.678716	0.231322	-0.447394
uc007vah.2,uc007vai.1,uc007vaj.1,uc007vak.1,uc007val.1,uc011zqg.1,uc011zqh.1,uc011zqi.1:chr14:-:121941260:122196956:Dock9:44:46-47-48-49-50-51	ES	E44,E46	E44,E45	-1.25824	0.248923	1.50717	4.0834e-06	0.000274949	0.761103	0.399446	-0.361656
uc007usp.2,uc007usq.2:chr14:+:79248984:79602117:1300010F03Rik:<1-2-3-4-5-6-7-8-9-10-11-12-13-14-15-16-17-18-19-20-21-22-23-24-25-26:	ALE	E26,E27	E26,E28,E29,E30,E31,E32,E33,E34,E35,E36,E37,E38,E39,E40,E41,E42,E43,E44,E45,E46	-0.649671	-2.3076	-1.65793	4.17764e-06	0.000278848	0.845514	0.520401	-0.325113
uc007jka.1,uc007jkb.1,uc007jkc.1,uc007jkd.1,uc007jke.2,uc007jkf.2,uc007jkg.2,uc011xwf.1,uc011xwg.1:chr11:+:62633754:62690964:Fbxw10,Trim16::7-8-9-10.11>	AFE	E4,E5,E7	E6,E7	1.71847	20	18.2815	4.91364e-06	0.000316951	0.732107	1	0.267893
uc008dne.1,uc008dnf.1:chr17:+:73186043:73200535:Ypel5::3-4>	AFE	E1,E3	E2,E3	1.88898	0.211068	-1.67791	4.86523e-06	0.000316951	0.0970738	0.347652	0.250579
uc008gaj.1,uc008gak.1,uc008gal.1:chr19:-:4622550:4625617:Face-2,Rce1:5-6:8-9-10-11>	A5SS	E6,E8	E6,E7,E8	1.03609	2.62708	1.59099	4.90645e-06	0.000316951	0.259105	0.0522942	-0.206811
uc008wdp.2,uc008wdq.2,uc008wdr.2:chr4:+:154865469:154933378:Gnb1:3-4-5-6-7-8-9-10-11:13>	A3SS	E11,E13	E11,E12,E13	1.35694	0.908735	-0.44821	4.82818e-06	0.000316951	0.201192	0.283211	0.0820189
uc008iux.1,uc008iuy.1,uc008iuz.1,uc008iva.1,uc008ivb.1,uc008ivc.1:chr2:-:26238319:26244836:Sdccag3::11-12-13-14>	AFE	E10,E11	E9,E11	0.7697	-0.807646	-1.57735	5.02519e-06	0.000319716	0.66847	0.912327	0.243857
uc009ona.1,uc009onb.1:chr9:+:21741476:21753351:BC018242,Lppr2:<1-3-4-5-6-7-8-9:11-12>	A5SS	E9,E10,E11	E9,E11	1.23352	-0.199537	-1.43305	5.03981e-06	0.000319716	0.759819	0.477358	-0.282461
uc008emj.1,uc008emk.1:chr18:+:35758320:35776839:Paip2:<1:3-4-5>	ES	E1,E3	E1,E2,E3	1.42605	3.14088	1.71482	5.21977e-06	0.000328418	0.138829	0.0163596	-0.12247
uc009uqf.1,uc009uqg.1:chrX:-:148771394:148777027:Tspyl2:<1-2:4-5-6-7-8>	IR	E2,E4	E2,E3,E4	-0.683699	1.13382	1.81752	5.34415e-06	0.00033351	0.580431	0.188031	-0.3924
uc007biv.1,uc007biw.2,uc007bix.2,uc011wmm.1:chr1:-:67047090:67085446:Lancl1:<1.2:5-6-7-8-9-10.11-12.13-14-15>	IR	E2,E5	E2,E3,E4,E5	-0.607735	-2.52303	-1.91529	5.44016e-06	0.000334069	0.559292	0.90241	0.343118
uc009nfl.1,uc009nfm.1,uc009nfn.1,uc009nfo.1:chr8:+:108692774:108722604:Slc7a6::8-9	AFE	E4,E5,E6,E8	E7,E8	2.21111	4.26953	2.05842	5.43652e-06	0.000334069	0.886449	0.993151	0.106701
uc007jew.1,uc007jex.1,uc007jey.1:chr11:-:59605252:59623338:Flcn:<1.2.3-4-5-6-7-8-9-10-11:13-14-15-16>	A3SS	E11,E13	E11,E12,E13	-1.05078	0.079539	1.13032	6.24342e-06	0.000380353	0.591369	0.288901	-0.302468
uc008bwg.1,uc008bwh.1,uc008bwi.1,uc012aox.1:chr17:-:32440620:32458098:AKAP95,Akap8:6-7-8-9:11-12-13-14-15-16>	A3SS	E9,E10,E11	E9,E11	0.625864	-0.354547	-0.98041	6.48106e-06	0.000391721	0.303787	0.129524	-0.174263
uc007lsb.2,uc011yfs.1:chr11:-:102337229:102417472:Gpatch8::5-6-7-9-10>	AFE	E1,E2,E3,E5	E4,E5	0.100961	2.27424	2.17328	6.59414e-06	0.000395442	0.520725	0.906301	0.385577
uc009lzu.1,uc009lzv.1,uc012gey.1:chr8:-:72816764:72826351:Ddx49:<1-2-3-4-5-6-7:	ALE	E7,E8	E7,E9,E10	-1.60551	-4.1259	-2.52039	6.67678e-06	0.000397294	0.0559556	0.00499943	-0.0509562
uc007cru.1,uc007crv.1,uc007crw.1:chr1:+:136302566:136308315:Cyb5r1:<1.2-4-5-6-7:9	A3SS	E7,E9	E7,E8,E9	-0.743599	0.332499	1.0761	7.14921e-06	0.000422133	0.408992	0.174324	-0.234668
uc009ird.1,uc009ire.1,uc009irf.1,uc009irg.1,uc009irh.1,uc009iri.1,uc009irj.1,uc012fqx.1,uc012fqy.1:chr7:+:109358966:109386265:Frag1,Pgap2:<4:6.7-11-12	ES	E4,E6	E4,E5	-2.78295	-0.843015	1.93994	7.27531e-06	0.00042307	0.921103	0.621147	-0.299956
uc008vuq.2,uc008vur.2:chr4:+:147822690:147931794:Mtor:<1-2-3-4-5:	ALE	E5,E6	E5,E7,E8,E9,E10,E11,E12,E13,E14,E15,E16,E17,E18,E19,E20,E21,E22,E23,E24,E25,E26,E27,E28,E29,E30,E31,E32,E33,E34,E35,E36,E37,E38,E39,E40,E41,E42,E43,E44,E45,E46,E47,E48,E49,E50,E51,E52,E53,E54,E55,E56,E57,E58,E59	-1.52353	-3.69732	-2.17379	7.40951e-06	0.000427635	0.852248	0.345116	-0.507132
uc007wlr.1,uc007wls.1:chr15:+:76527193:76530105:Gpt:14:16	IR	E14,E16	E14,E15,E16	0.659776	1.72547	1.0657	7.6496e-06	0.000438196	0.266761	0.109792	-0.156969
uc008nks.1,uc008nkt.1,uc008nku.1,uc008nkv.1:chr2:+:155343778:155411460:Acss2:10-12:14-15-16-17-18-19-20-21-22-23-24>	A5SS	E12,E14	E12,E13,E14	-0.102644	0.832351	0.934996	7.80108e-06	0.000443564	0.124845	0.0431231	-0.0817217
uc008vjm.1,uc008vjn.1,uc008vjo.1,uc008vjq.1:chr4:+:137220682:137285782:Rap1gap,mKIAA0474:<4-5-6-7-8-9-10-11-12-13-14-15-16-17-18-19:21-22-23	ES	E19,E21	E19,E20,E21	-1.91692	0.0853599	2.00228	8.18525e-06	0.000461985	0.685614	0.424975	-0.260639
uc008qbf.1,uc008qbg.1,uc008qbh.1,uc008qbi.1,uc008qbj.1:chr3:+:89876615:89904526:Tpm3:4-5-6:10-11	ME	E6,E8,E10	E6,E9,E10	-1.56886	-0.827618	0.74124	8.48982e-06	0.000475678	0.176821	0.296187	0.119366
uc007dbx.2,uc007dby.2,uc007dca.2,uc007dcb.2,uc007dcc.2,uc011wub.1,uc011wuc.1:chr1:+:157882793:157915989:Ifrg15,Tor1aip2:7:	ALE	E7,E8	E7,E9,E10,E11,E12	0.212434	-0.98459	-1.19702	8.77461e-06	0.000488072	0.746344	0.473133	-0.273211
uc009dsa.1,uc009dsb.1,uc012esq.1:chr6:-:124765036:124779465:Usp5:<1-2-3-4-5-6-7-8-9-10-11-12-13-14-15:17-18-19-20-21>	A5SS	E15,E17	E15,E16,E17	1.85845	0.537391	-1.32106	9.09949e-06	0.000502501	0.0991905	0.315456	0.216266
uc008zqk.1,uc008zql.1,uc008zqm.1,uc008zqn.1,uc012edp.1:chr5:+:125079647:125202517:Atp6v0a2::19.20-21-22-23-24-25>	AFE	E14,E15,E16,E19	E18,E19	1.62702	3.67685	2.04983	9.2761e-06	0.000508595	0.887333	0.989698	0.102365
uc009man.2:chr8:-:73037294:73047079:2810422J05Rik:<1-2:4-5>	ES	E2,E4	E2,E3,E4	-3.45198	-1.65048	1.8015	9.36649e-06	0.000509909	0.971496	0.795936	-0.17556
uc007xxl.1,uc007xxm.1,uc007xxn.1:chr15:-:103021976:103070247:Cbx5::3	AFE	E1,E3	E2,E3	0.627189	-0.916291	-1.54348	1.00938e-05	0.000538058	0.379774	0.71781	0.338035
uc008jpp.2,uc008jpq.2,uc008jpr.1,uc008jps.2:chr2:-:48758273:48804787:MuORC4,Orc4:<1-2-3-4-5-6-8-9-10-11:14-15-16-17>	A3SS	E11,E14	E11,E13,E14	-0.723992	-1.87149	-1.1475	1.06787e-05	0.000565306	0.746602	0.854821	0.108218
uc008dco.1,uc008dcp.1:chr17:-:56753721:56766326:Lonp1:<1.2-4-5-6-7-8-9:11	IR	E9,E10,E11	E9,E11	-1.62519	-3.0008	-1.37561	1.08146e-05	0.000568581	0.0632313	0.0103046	-0.0529267
uc009igp.1,uc009igq.1,uc009igr.1,uc009igs.1,uc009igt.1,uc009igu.1,uc009igv.1,uc009igw.1:chr7:+:97278741:97357442:Picalm,mKIAA4114:18-19-20:22-23-24>	ES	E20,E22	E20,E21,E22	-0.416348	-1.05204	-0.635691	1.0908e-05	0.000569588	0.585089	0.726695	0.141606
uc007qeq.2,uc007qer.2,uc007qes.2:chr13:+:41096378:41108402:Pak1ip1:<1-2-3:5-7	IR	E3,E5	E3,E4,E5	1.50278	2.82469	1.32191	1.11551e-05	0.000578557	0.160884	0.0368188	-0.124065
uc008zlx.2,uc008zlz.2,uc008zma.2,uc008zmb.1,uc008zmc.2,uc008zmd.2,uc008zme.2:chr5:-:123181179:123229419:Camkk2,mKIAA0787:<1-2-3-5-7:	ALE	E7,E8	E7,E9,E10,E11,E12,E13,E14,E15,E16	-0.418162	-2.45244	-2.03428	1.16378e-05	0.000595547	0.599529	0.149034	-0.450495
uc009gpq.2,uc012fjp.1:chr7:-:51745307:51751883:2310044H10Rik:<1-2-3-4-5-6:8>	ES	E6,E8	E6,E7,E8	0.554428	2.08284	1.52841	1.1892e-05	0.000604522	0.272907	0.0719565	-0.20095
uc008qbt.2,uc008qbu.2,uc008qbv.2,uc008qbw.2:chr3:+:90058202:90068047:Crtc2:7:9-10-11-12-13-14-15-17-18>	IR	E7,E9	E7,E8,E9	0.235529	1.43877	1.20324	1.23255e-05	0.000622438	0.337823	0.105335	-0.232488
uc012gbp.1,uc012gbq.1:chr8:+:28087807:28091934:Zfp703:<1:3>	ES	E1,E3	E1,E2,E3	0.649345	2.77882	2.12947	1.24618e-05	0.000625206	0.262189	0.0428836	-0.219305
uc007lgw.1,uc007lgx.1:chr11:+:98543867:98557292:Psmd3:<1-2-3-4-5:7-9-10-11-12-13-14>	IR	E5,E7	E5,E6,E7	1.55005	2.73537	1.18532	1.29615e-05	0.000646054	0.0951462	0.0279032	-0.067243
uc008vak.2,uc008val.2,uc008vam.2,uc008van.2,uc008vao.1,uc012dma.1,uc012dmb.1,uc012dmc.1:chr4:-:131479340:131631228:Epb4.1:17:21	ES	E17,E21	E17,E20,E21	0.302567	-0.789455	-1.09202	1.36661e-05	0.000676779	0.373441	0.632921	0.25948
uc007mkj.1,uc007mkk.1,uc007mkl.1,uc007mkm.1:chr11:-:116033201:116060359:Acox1:3:6-7-8-9-10-11-12-13-14-15-16>	ES	E3,E6	E3,E4	-0.0333636	1.90172	1.93509	1.45344e-05	0.00070248	0.428252	0.0704523	-0.3578
uc008kho.1,uc008khp.1,uc008khq.1,uc008khr.1:chr2:+:80457370:80471818:Dusp19,SKRP1:4:7-8>	A3SS	E4,E7	E4,E6,E7	-0.927644	-2.36823	-1.44059	1.4435e-05	0.00070248	0.640172	0.872679	0.232507
uc007axm.1,uc007axn.1,uc007axo.1,uc007axp.1:chr1:-:51522850:51535263:Nabp1,Obfc2a:6-7-8-9-10:12	IR	E10,E12	E10,E11,E12	-2.55161	-1.00165	1.54996	1.51042e-05	0.000721837	0.8131	0.336577	-0.476523
uc008kvg.2,uc008kvh.2,uc008kvi.2,uc008kvj.2:chr2:-:91051738:91077223:Ddb2:5:7-8-9-10-11-12>	ES	E5,E7	E5,E6,E7	-1.88623	-0.33777	1.54846	1.51401e-05	0.000721837	0.835459	0.468198	-0.367261
uc008rth.1,uc008rti.1,uc008rtj.1,uc008rtk.1,uc008rtl.1:chr3:+:152009444:152056578:Usp33,Vdu1:<1-2-3-4.5-6-7-8-9-10-11-12-14-15:17-18-19-20-21-22-23-24-25.26-27-28>	A3SS	E15,E17	E15,E16,E17	-0.0873645	-1.61786	-1.5305	1.54145e-05	0.000730383	0.528239	0.8388	0.310561
uc009sda.1,uc009sdb.1,uc009sdc.1,uc009sdd.1,uc009sde.1,uc009sdf.1:chr9:+:121206651:121384036:Trak1:19:21	ES	E19,E21	E19,E20,E21	2.36534	1.04161	-1.32373	1.58678e-05	0.000747248	0.0531125	0.206582	0.15347
uc007klw.2,uc007kly.2,uc007klz.2,uc007kma.2,uc007kmb.2,uc007kmc.2:chr11:+:80196780:80219235:Zfp207:9:12-13-14	ES	E9,E10,E12	E9,E12	-0.48239	-1.51889	-1.0365	1.63072e-05	0.000763258	0.318455	0.117407	-0.201048
uc008nme.2,uc008nmf.2,uc008nmg.2,uc008nmh.1,uc008nmi.1,uc012chp.1:chr2:-:155897576:155937701:Cpne1,Rbm12:3:	ALE	E3,E4,E5	E3,E6,E7,E8	0.54698	-0.552009	-1.09899	1.69253e-05	0.000787385	0.16876	0.0609367	-0.107824
uc009grj.1,uc009grk.1,uc009grl.1:chr7:-:52118437:52125158:Ptov1:<1-2-3-4-5-6-7:9-10-11-12-13	IR	E7,E9	E7,E8,E9	1.34658	2.55465	1.20807	1.81949e-05	0.000841349	0.163619	0.0466273	-0.116991
uc007tnz.1,uc011zki.1:chr14:+:52636539:52639462:G630016D24Rik:<1-2-3-4-5:7-8>	IR	E5,E7	E5,E6,E7	-1.11329	1.09454	2.20783	1.90391e-05	0.000875115	0.632393	0.206441	-0.425952
uc009pxz.1,uc009pya.1,uc009pyb.1,uc009pyc.1,uc009pyd.1,uc009pye.1:chr9:+:59465090:59498076:Parp6:11-12:14-15-16-17-18-19-20-21	A5SS	E12,E14	E12,E13,E14	-1.3603	-2.98619	-1.62589	1.94668e-05	0.000884182	0.758386	0.94405	0.185664
uc007qrp.2,uc011yzv.1:chr13:-:55640676:55672481:Fam193b:<1:3-4-5-6	ES	E1,E3	E1,E2,E3	-1.67942	-0.548881	1.13054	1.98171e-05	0.000894802	0.811972	0.580378	-0.231594
uc007obm.1,uc007obn.1,uc007obo.1,uc007obp.1,uc007obq.1:chr12:+:82046490:82051494:Srsf5:2:4-6-7-8-9-10	A5SS	E2,E4	E2,E3,E4	0.573108	1.92218	1.34907	2.02551e-05	0.000909229	0.254355	0.0606082	-0.193747
uc007cvv.1,uc007cvw.1:chr1:-:140748555:140753431:2310009B15Rik::3-4>	AFE	E1,E3	E2,E3	0.908531	3.01839	2.10986	2.12619e-05	0.000943693	0.195428	0.0175993	-0.177828
uc009rrd.1,uc009rre.2,uc012hav.1:chr9:+:108756367:108815380:Slc26a6,slc26a6:<1.2:4-5-6-7-8	A5SS	E2,E4	E2,E3,E4	-20	-1.33795	18.6621	2.12687e-05	0.000943693	1	0.481885	-0.518115
uc008haw.2,uc008hax.2:chr19:-:24994405:25036106:Cbwd1:<1:3-4-5-6-7-8-9-10-11-12-13-14-15-16>	A5SS	E1,E3	E1,E2,E3	-0.329295	1.41771	1.747	2.15908e-05	0.000952476	0.516859	0.11346	-0.403399
uc008gkk.2,uc008gkl.2,uc008gkm.2,uc012bhu.1:chr19:-:7300157:7315712:AK209302,Naa40:7.8:10-11	IR	E8,E10	E8,E9,E10	-0.298837	1.32818	1.62702	2.26141e-05	0.000969755	0.475935	0.149549	-0.326386
uc008wbs.1,uc008wbt.1,uc008wbu.1,uc008wbv.1,uc008wbw.1,uc008wbx.1:chr4:-:153690233:154010982:Prdm16,mel1::16-17-18-19	AFE	E13,E14,E16	E15,E16	0.0224798	1.66441	1.64193	2.25851e-05	0.000969755	0.525973	0.851177	0.325204
uc009oke.1,uc009okf.1,uc012gpb.1:chr9:-:20908511:20935719:Tyk2:<1-2-3-4-5:8-10-11-12-13-14-15-16	IR	E5,E8	E5,E6,E7,E8	0.314151	2.04579	1.73164	2.2602e-05	0.000969755	0.27998	0.064257	-0.215723
uc009sqn.2,uc009sqo.2:chrX:+:10294490:10296828:Mid1ip1:<1:3>	A3SS	E1,E3	E1,E2,E3	1.54664	1.06537	-0.481262	2.23234e-05	0.000969755	0.15463	0.252714	0.0980841
uc009ttt.1,uc009ttu.1,uc009ttv.1,uc009ttw.1,uc012hmg.1:chrX:-:92244282:92391844:Arhgef9:7-8-9-10-11-12-13-14:16>	IR	E14,E16	E14,E15,E16	-1.94165	-0.378954	1.5627	2.25369e-05	0.000969755	0.417577	0.110808	-0.306769
uc008bef.1,uc008beg.1:chr17:+:26698456:26793878:Ergic1::5-6-7-8-9-10	AFE	E1,E2,E3,E5	E4,E5	1.36242	0.0323979	-1.33002	2.27605e-05	0.000970608	0.862888	0.618306	-0.244581
uc009gxf.2,uc009gxg.1,uc009gxh.1:chr7:-:53062006:53069686:AB013468,Cyth2::5.6-7-8-9-10-11-12-13-14-15-16>	AFE	E1,E5	E2,E3,E5	0.337619	2.19565	1.85803	2.30904e-05	0.000979236	0.195629	0.0389224	-0.156706
uc007ksl.1,uc007ksm.1:chr11:+:86298158:86312509:Rnft1:4:6-7-8-9-10-11>	ES	E4,E6	E4,E5,E6	-1.45726	-4.55447	-3.09721	2.38145e-05	0.00100439	0.778892	0.973294	0.194402
uc008upi.2,uc008upj.2,uc008upk.2,uc008upl.2,uc008upm.1,uc008upn.1,uc008upq.1,uc008upr.2,uc008upt.1:chr4:-:123026875:123361603:Macf1:100-101:103-104>	ES	E101,E103	E101,E102,E103	1.29354	-0.0685435	-1.36209	2.403e-05	0.00100795	0.13929	0.396951	0.257661
uc008hmp.2,uc008hmq.2,uc008hmr.2,uc008hms.1,uc008hmt.1,uc008hmu.2:chr19:+:42007961:42018593:Zdhhc16:11-12:14-15-16-18>	ES	E12,E14	E12,E13,E14	-0.524758	1.04354	1.5683	2.46987e-05	0.00102551	0.592073	0.226413	-0.36566
uc009dsw.1,uc009dsx.1,uc009dsy.1,uc009dsz.1,uc009dtb.1,uc009dtc.1:chr6:+:124959255:124987887:Zfp384:7:9	IR	E7,E9	E7,E8,E9	0.244466	2.07022	1.82575	2.4716e-05	0.00102551	0.346565	0.0604169	-0.286148
uc008vge.2,uc008vgf.2,uc008vgg.2,uc012dmz.1:chr4:-:134876398:134909129:Srrm1:<1-2-3:5-6-7-8-9.10.11-12-13-14-15	IR	E3,E5	E3,E4,E5	-1.30773	-0.0354047	1.27233	2.50398e-05	0.00103336	0.306401	0.100211	-0.20619
uc007lgz.1,uc007lha.1,uc007lhb.1,uc007lhc.1,uc011yeg.1:chr11:-:98565904:98590749:Med24:12:14-15-16-17-18-19-20-21-22-23-24-25-26-28-29-30-31-32-33-34>	IR	E12,E14	E12,E13,E14	-2.36643	-0.0676831	2.29874	2.56819e-05	0.00105419	0.73094	0.184687	-0.546253
uc007gjb.1,uc007gjc.2,uc007gjd.1,uc011xjk.1:chr10:+:81091284:81110357:Ankrd24:16-17.18.19-20-21-22-23:25-26-27>	A5SS	E23,E25	E23,E24,E25	0.333291	1.83486	1.50157	2.58854e-05	0.0010569	0.0855364	0.0134849	-0.0720515
uc008upi.2,uc008upj.2,uc008upk.2,uc008upl.2,uc008upm.1,uc008upn.1,uc008upq.1,uc008upr.2,uc008upt.1:chr4:-:123026875:123361603:Macf1:56-57-58-59-60-61-62-63-64-65-66-67-68-69-70-71-72-73-74-75-76-77-78-79-80-81-82-83-84-85-86-87-88-89-90-91-92-93-96-97-98:100-101	ES	E98,E100	E98,E99,E100	-0.877986	-1.72965	-0.851659	2.60431e-05	0.00105771	0.69731	0.845336	0.148027
uc008nwe.1,uc008nwf.2,uc008nwg.2:chr2:-:164618267:164630381:Acot8:<1:3	ES	E1,E3	E1,E2,E3	-0.044593	-1.97938	-1.93479	2.67187e-05	0.00107944	0.419176	0.832748	0.413572
uc009dsw.1,uc009dsx.1,uc009dsy.1,uc009dsz.1,uc009dtb.1,uc009dtc.1:chr6:+:124959255:124987887:Zfp384:3-4-5:7	IR	E5,E7	E5,E6,E7	-0.358254	1.07045	1.4287	2.70252e-05	0.0010861	0.455996	0.136497	-0.319499
uc007hrs.1,uc007hrt.1,uc007hru.1,uc007hrv.1,uc007hrw.1,uc007hrx.1,uc007hsa.1,uc007hsb.1:chr11:-:3031852:3093466:BC049259,Sfi1:<1-2-4-5-7-8-9-10-11-12-13-14-15-16-17-18-19-20:22-23-24-25-26-27-28.29	ES	E20,E22	E20,E21,E22	0.968995	3.84593	2.87693	2.78181e-05	0.00111215	0.223592	0.0186414	-0.204951
uc008lyk.1,uc008lyl.1,uc008lym.1,uc008lyn.1,uc008lyo.1,uc008lyp.1,uc008lyq.1,uc008lyr.1,uc008lys.1,uc012ccp.1:chr2:-:121136296:121180813:Ppip5k1,mKIAA0377:<1-2-4-5-6-7-8-9:11-13	IR	E9,E10,E11	E9,E11	-0.415026	-1.44391	-1.02888	2.96175e-05	0.00117795	0.134978	0.0463446	-0.0886338
uc007baz.2,uc007bba.2,uc007bbb.2,uc011wlf.1,uc011wlg.1:chr1:-:57445087:57463518:1110034B05Rik:4-5:7-9-10.11-12>	IR	E5,E7	E5,E6,E7	0.392562	1.68434	1.29178	2.9834e-05	0.00118044	0.175854	0.0479152	-0.127938
uc009mim.1,uc009min.2:chr8:-:81790322:81818855:Mmaa:4:6-7-8-9-10>	A5SS	E4,E6	E4,E5,E6	-0.649224	-1.74256	-1.09333	3.00946e-05	0.00118465	0.653282	0.85309	0.199808
uc008qbt.2,uc008qbu.2,uc008qbv.2,uc008qbw.2:chr3:+:90058202:90068047:Crtc2:2-3-5:7	IR	E5,E7	E5,E6,E7	0.198106	1.56577	1.36766	3.13112e-05	0.00122625	0.212857	0.0531229	-0.159734
uc008glk.1,uc008gll.1,uc012bhx.1:chr19:-:7671150:7681671:Lgals12:7:9-10-11-12>	ES	E7,E9	E7,E8	-3.25959	-1.55959	1.7	3.20268e-05	0.00124791	0.964937	0.814375	-0.150562
uc007ski.1:chr14:-:21506457:21522234:AK018074:<1:3>	ES	E1,E3	E1,E2,E3	0.743578	-0.916291	-1.65987	3.235e-05	0.00125414	0.231503	0.671572	0.44007
uc009qfo.1,uc009qfp.1,uc009qfq.2,uc009qfr.2,uc009qfs.1,uc012gvr.1,uc012gvs.1,uc012gvt.1,uc012gvu.1,uc012gvv.1,uc012gvw.1,uc012gvx.1:chr9:-:66870399:66897020:Tpm1:5-6-7-9-10-11:	ALE	E11,E12,E14	E11,E16	2.39285	1.11619	-1.27666	3.39504e-05	0.00130957	0.966715	0.879004	-0.0877111
uc007woz.2,uc007wpa.2,uc011zvn.1,uc011zvo.1:chr15:+:78156227:78184277:Csf2rb:<1-3-5-6:8-9-10-11-12-13-15-16-17-18>	ES	E6,E8	E6,E7,E8	-1.88707	-20	-18.1129	3.4776e-05	0.00132156	0.819782	1	0.180218
uc008gdy.2,uc008gdz.2,uc008gea.2,uc008geb.2,uc008gec.2,uc008ged.2:chr19:-:5603013:5610094:Kat5::5-6	AFE	E3,E5	E4,E5	0.140357	1.54881	1.40846	3.494e-05	0.00132156	0.281276	0.0755267	-0.20575
uc008isx.2,uc008isy.2:chr2:-:25475585:25477525:Tmem141:<2:4-5-6-7>	IR	E2,E4	E2,E3,E4	0.45907	-0.592027	-1.0511	3.495e-05	0.00132156	0.247873	0.526398	0.278525
uc008svg.2,uc008svh.2,uc008svi.2,uc008svj.2:chr4:+:48552817:48574792:5730528L13Rik::6>	AFE	E4,E6	E5,E6	-0.109399	-1.54336	-1.43396	3.47078e-05	0.00132156	0.908333	0.979161	0.0708278
uc008gjk.2,uc008gjl.1,uc008gjm.1,uc012bhq.1:chr19:-:7012559:7016940:Gpr137:4.5.6:8	IR	E6,E8	E6,E7	-0.831546	1.58578	2.41733	3.78118e-05	0.00142276	0.676385	0.199324	-0.477061
uc007jpw.1,uc007jpx.1,uc007jpy.1:chr11:-:69156774:69182928:Chd3::39-40-41>	AFE	E33,E34,E35,E36,E37,E39	E38,E39	0.659219	1.96515	1.30594	3.81005e-05	0.00142567	0.414828	0.744295	0.329467
uc007rjr.1:chr13:-:91074953:91363592:Atg10:<1-2-3:6-7-8>	ES	E3,E6	E3,E5	-0.498391	2.06585	2.56424	3.82606e-05	0.00142567	0.560504	0.130712	-0.429792
uc009joh.1,uc009joi.1,uc012ftf.1:chr7:-:129231557:129245362:Ndufab1:<1-2-3-4:	ALE	E4,E5	E4,E6	2.85224	1.15709	-1.69515	3.86147e-05	0.00143191	0.981614	0.87561	-0.106004
uc007hwb.1,uc007hwc.1,uc007hwd.1,uc007hwe.1,uc011xrc.1:chr11:+:4999440:5006094:Rhbdd3:10:12-13>	A5SS	E10,E12	E10,E11,E12	-1.88529	-4.69135	-2.80606	3.90577e-05	0.00143766	0.860386	0.992171	0.131784
uc007vah.2,uc007vai.1,uc007vaj.1,uc007vak.1,uc007val.1,uc011zqg.1,uc011zqh.1,uc011zqi.1:chr14:-:121941260:122196956:Dock9::43	AFE	E38,E39,E40,E43	E41,E42,E43	-0.0098592	3.0787	3.08856	3.93314e-05	0.00143766	0.796511	0.120341	-0.67617
uc009qrt.1,uc009qru.1,uc009qrv.1,uc009qrw.1,uc009qrx.1:chr9:+:75079820:75153257:Myo5c:35-36-37-38-39-40-41:43-44-45-46-47>	A3SS	E41,E43	E41,E42,E43	-1.47508	-3.58461	-2.10953	3.92586e-05	0.00143766	0.793662	0.974665	0.181004
uc008qls.1,uc008qlt.1:chr3:-:95701722:95708562:Car14:<1-2:	ALE	E2,E3	E2,E4,E5,E6,E7,E8,E9,E10,E11,E12	-1.40917	-3.04387	-1.63471	3.95888e-05	0.00144021	0.600191	0.190013	-0.410178
uc007yzc.2,uc007yze.2,uc007yzf.2,uc012aeo.1:chr16:+:32644728:32683579:Tnk2::11-12	AFE	E10,E11	E1,E2,E3,E4,E5,E6,E7,E8,E9,E11	-1.59801	-0.205327	1.39268	4.0502e-05	0.00145319	0.265261	0.0833923	-0.181869
uc008ddd.2,uc008dde.2:chr17:+:56904173:56909516:Dus3l:5-6-7:9	IR	E7,E9	E7,E8,E9	-0.34164	0.891388	1.23303	4.03909e-05	0.00145319	0.451045	0.250538	-0.200507
uc009txz.1,uc009tya.1,uc009tyb.1,uc009tyc.2,uc009tyd.2:chrX:+:98835400:98879690:Ogt::11-12-13-14-15-16-17-18-19-20-21-22-23-24-25-26-27-28>	AFE	E10,E11	E6,E7,E8,E11	0.453623	-0.984621	-1.43824	4.05135e-05	0.00145319	0.443761	0.805691	0.36193
uc007axm.1,uc007axn.1,uc007axo.1,uc007axp.1:chr1:-:51522850:51535263:Nabp1,Obfc2a:3:6-7-8-9-10	IR	E3,E6	E3,E4,E5,E6	-0.398251	0.937803	1.33605	4.16372e-05	0.00147966	0.431198	0.113354	-0.317843
uc009gsv.1,uc009gsw.1:chr7:-:52308976:52317792:Prrg2:<1:3	ES	E1,E3	E1,E2,E3	-4.15079	-1.05351	3.09728	4.16281e-05	0.00147966	0.988058	0.728864	-0.259195
uc007ofu.2,uc007ofv.1:chr12:+:86114219:86116039:Isca2:3:7>	ES	E3,E7	E3,E5,E7	-2.09091	-0.842899	1.24801	4.19612e-05	0.00148064	0.868095	0.60418	-0.263916
uc009fsp.1,uc009fsq.1,uc009fsr.1,uc009fss.1:chr7:-:26164545:26181006:Lipe:<2:4-5-6-7-8-9-10	A3SS	E2,E4	E2,E3,E4	-0.2059	1.1733	1.3792	4.20504e-05	0.00148064	0.293553	0.0842687	-0.209284
uc007det.1,uc007deu.1,uc007dev.1,uc007dew.1,uc007dex.1,uc011wun.1:chr1:+:162965296:162968668:Gas5:5:7	IR	E5,E7	E5,E6,E7	1.13195	0.455668	-0.676277	4.25852e-05	0.00149262	0.160746	0.267666	0.10692
uc009fnd.2,uc009fne.2:chr7:-:20301992:20334922:Pvrl2:<1-2-3-4-5:	ALE	E5,E6	E5,E7,E8,E9,E10	-0.0290593	-1.47379	-1.44473	4.28374e-05	0.00149464	0.659008	0.340274	-0.318734
uc009fap.1,uc009faq.1,uc009far.1:chr7:-:6083090:6107573:Zfp787:<1-3:	ALE	E3,E4	E3,E5	1.36625	-0.3681	-1.73435	4.42887e-05	0.00153828	0.954441	0.802027	-0.152414
uc007muc.1,uc007mud.1:chr11:-:120572254:120575081:Stra13:<1:3	ES	E1,E3	E1,E2,E3	0.499512	-0.824215	-1.32373	4.49527e-05	0.00155431	0.239414	0.521422	0.282009
uc007qfu.1,uc007qfv.2,uc007qfw.2,uc011yyt.1:chr13:-:43247112:43266774:Tbc1d7:4-5-6-8-9-10:12>	A5SS	E10,E12	E10,E11,E12	-0.992101	-2.80358	-1.81148	4.56658e-05	0.00157189	0.660753	0.922904	0.26215
uc008sho.1,uc008shp.1,uc008shq.1,uc008shr.1:chr4:-:40629110:40650220:Aptx::3	AFE	E1,E3	E2,E3	0.650361	1.95752	1.30716	4.63498e-05	0.00158831	0.12393	0.0383124	-0.0856173
uc009bfz.1,uc009bga.1,uc012ejs.1:chr6:+:31170430:31287394:AK008857,BC021953,BC099512:<1:3	ES	E1,E3	E1,E2,E3	1.08066	0.0822719	-0.998387	4.74052e-05	0.00161726	0.143146	0.373656	0.23051
uc009iyq.2,uc009iyr.2,uc012frp.1:chr7:-:112782714:112788930:Arfip2:<1-2-3-5-6.7:9-10-11>	A5SS	E7,E9	E7,E8,E9	0.494936	1.72116	1.22622	4.94942e-05	0.00168105	0.280855	0.0832126	-0.197643
uc009cwh.2,uc009cwi.2,uc012eot.1:chr6:-:89333139:89545646:Chchd6:<1-2-3-4:6-8-9>	ES	E4,E6	E4,E5,E6	-2.13892	-3.55929	-1.42037	5.04702e-05	0.00170665	0.878972	0.972027	0.0930558
uc007quu.2,uc007quv.1:chr13:+:59686693:59736142:Naa35::12-13-14-15-16-17-19-21-22-23-24-25-26>	AFE	E11,E12	E1,E2,E3,E4,E5,E6,E7,E8,E9,E10,E12	-1.61824	-3.64761	-2.02937	5.09225e-05	0.00171439	0.530635	0.911203	0.380568
uc007lau.1,uc007lav.1:chr11:+:95703608:95707045:Gngt2::3	AFE	E1,E3	E2,E3	2.89708	1.97892	-0.918166	5.13371e-05	0.00171627	0.0538586	0.122681	0.0688224
uc008dct.1,uc008dcu.1,uc008dcv.1,uc008dcw.1:chr17:+:56812679:56851192:Ranbp3:10-11-12-14:16	IR	E14,E16	E14,E15,E16	0.47469	1.67003	1.19534	5.14368e-05	0.00171627	0.165341	0.0543784	-0.110962
uc008uat.2,uc008uau.2,uc012die.1:chr4:+:107838070:107851913:Echdc2::5-6-7-8-9-10-11>	AFE	E1,E2,E3,E5	E4,E5	-0.106322	0.953054	1.05938	5.17621e-05	0.00171627	0.18909	0.371079	0.181989
uc007haa.2,uc007hab.2,uc007hac.2,uc007had.2,uc007hae.2:chr10:+:110910247:110935206:Nap1l1:6-7-8-9-10-11-12-13-14:	ALE	E14,E15	E14,E17,E18	-1.05368	-2.06076	-1.00707	5.30508e-05	0.00174027	0.183768	0.0801042	-0.103664
uc008yib.1,uc008yic.1:chr5:+:101227777:101233488:Mrps18c:<1-2-3:5-7>	ES	E3,E5	E3,E4,E5	-3.66273	-1.43845	2.22428	5.30516e-05	0.00174027	0.979351	0.78345	-0.195901
uc008vjs.2,uc008vjt.2,uc008vju.2,uc008vjv.1:chr4:+:137418151:137521144:Ece1::6-7-8-9-10-11-12-13-14-15-16-17-18-19-20-21-22>	AFE	E3,E6	E5,E6	-1.13475	1.10434	2.23908	5.35876e-05	0.00175038	0.50746	0.107341	-0.400119
uc007ajn.2,uc007ajo.2,uc007ajq.2,uc007ajr.2:chr1:-:16218890:16509383:Stau2:4-6-7-8-9-10-11-12-13:16>	ES	E13,E16	E13,E15,E16	-2.53101	-1.29855	1.23247	5.46739e-05	0.00177079	0.907989	0.723763	-0.184226
uc007grm.2,uc007grn.2,uc007gro.1:chr10:+:87922331:87935981:Sycp3:6-7-8:10>	IR	E8,E10	E8,E9,E10	-0.693147	-2.3394	-1.64625	5.45173e-05	0.00177079	0.544632	0.853822	0.30919
uc009lzg.2,uc009lzh.2,uc012gex.1:chr8:-:72708238:72736180:Slc25a42:<1-2-3-4-5:7-8	IR	E5,E7	E5,E6,E7	-1.63262	-0.120751	1.51187	5.57444e-05	0.00179787	0.739136	0.28392	-0.455216
uc008bpv.1,uc008bpw.1,uc008bpx.1,uc008bpy.1,uc008bpz.1:chr17:+:28046284:28199581:Anks1::13-14-15-16-17-18-19-20-21-22-23-24	AFE	E12,E13	E5,E6,E7,E8,E9,E10,E11,E13	-0.0154555	-1.26084	-1.24538	5.74044e-05	0.00184367	0.220963	0.56004	0.339078
uc007veg.1,uc007veh.1:chr15:-:7823054:8049209:Gm1943,Wdr70:<1-2-3:	ALE	E3,E4	E3,E5,E6,E7,E8,E9,E10,E11,E12,E13,E14,E15,E16,E17,E18,E19	0.991243	-0.0242588	-1.0155	5.95764e-05	0.00190545	0.864519	0.673012	-0.191507
uc007gft.1,uc007gfu.1:chr10:-:80506817:80522899:Sgta:<1-2-3:5-6-7-8-9-10-11-12-13>	A3SS	E3,E5	E3,E4,E5	1.63834	0.914726	-0.723615	6.04078e-05	0.00192403	0.154893	0.270211	0.115318
uc007cpk.1,uc007cpl.1,uc007cpm.1,uc007cpn.1,uc007cpo.1,uc007cpp.1:chr1:-:134886421:134927160:Mdm4,Mdmx:6-7-8:11-12-13-14-15>	ES	E8,E11	E8,E9,E10,E11	-1.27083	0.780147	2.05098	6.31708e-05	0.00200372	0.737159	0.252824	-0.484334
uc008pdm.2,uc008pdn.2:chr3:+:51028368:51055576:Ccrn4l::3-4>	AFE	E1,E3	E2,E3	-1.67766	1.42483	3.1025	6.44015e-05	0.00203434	0.674134	0.0823575	-0.591777
uc007pqg.2,uc007pqh.2,uc007pqi.1,uc011ywo.1:chr13:-:21478872:21494624:Zkscan3:4-5-6-7:	ALE	E7,E11	E7,E8,E9,E10	-0.479155	0.501274	0.980429	6.79171e-05	0.00212789	0.441509	0.693726	0.252217
uc008mhi.2,uc008mhj.2,uc008mhk.2,uc008mhl.2,uc008mhm.2:chr2:+:129024508:129037348:Slc20a1:<1-3-5-7-10:	ALE	E10,E11	E10,E12,E13,E14,E15,E16,E17	-2.33368	-4.04836	-1.71468	6.77765e-05	0.00212789	0.190944	0.0400453	-0.150898
uc008cdr.2,uc012aqo.1:chr17:+:34973963:34976131:Dom3z:<1:3-4-5-6-7-8>	A5SS	E1,E3	E1,E2,E3	-0.117783	1.48808	1.60586	7.10266e-05	0.00221626	0.505443	0.21538	-0.290062
uc012doh.1,uc012doi.1,uc012doj.1,uc012dok.1:chr4:-:142697293:142802612:Prdm2:3-4.5-6-7-8-9:	ALE	E9,E10	E9,E11,E12	-1.46441	-3.43399	-1.96958	7.68424e-05	0.00238802	0.635129	0.129458	-0.50567
uc007wkp.2,uc007wkq.2,uc007wkr.2,uc007wks.2:chr15:-:76366157:76369176:Fbxl6:<1-3:5	IR	E3,E5	E3,E4,E5	-1.29028	0.0738414	1.36413	7.72682e-05	0.00239158	0.696074	0.314001	-0.382072
uc009dnw.1,uc009dnx.1,uc009dny.1,uc009dnz.2,uc009doa.1,uc009dob.1:chr6:-:120881739:121081017:Mical3:20:	ALE	E20,E21	E20,E23,E24	-0.590368	-2.15107	-1.56071	7.87634e-05	0.00242807	0.368844	0.0910566	-0.277787
uc009grf.1,uc009grg.1,uc009grh.1,uc009gri.1,uc012fjx.1:chr7:+:52112520:52118299:Pnkp:<1.2:4-5	IR	E2,E4	E2,E3,E4	-0.315871	-1.63095	-1.31508	8.04197e-05	0.00245937	0.494464	0.853665	0.3592
uc009utk.1,uc009utl.2,uc009utm.2,uc009utn.2,uc012hrg.1:chrX:+:156940097:157036810:Phka2:3-4-5-6:	ALE	E6,E7	E6,E8,E9,E10,E11,E12,E13,E14,E15,E16,E17,E18,E20,E21,E22,E23,E24,E25,E26,E27,E28,E29,E30,E31,E32,E33,E34,E35,E36,E37	-1.42627	-3.7048	-2.27853	8.01355e-05	0.00245937	0.530315	0.0554175	-0.474898
uc008gfv.2,uc008gfw.2,uc008gfx.1,uc008gfy.2,uc012bhg.1,uc012bhh.1:chr19:-:5897134:5912866:Dpf2::10-11.12-13-14-16>	AFE	E1,E3,E4,E5,E6,E7,E8,E10	E9,E10	0.957187	2.11711	1.15992	8.1004e-05	0.00246741	0.671604	0.868155	0.196551
uc008seo.2,uc008sep.2,uc008seq.2:chr4:+:32051081:32110441:Map3k7:<1-2-3-4-5-6-8-9-10-11-12:14-15-16-17-18>	ES	E12,E14	E12,E13,E14	-0.666715	-1.60515	-0.938435	8.28729e-05	0.00251436	0.585578	0.802661	0.217082
uc007lln.1,uc011yfb.1:chr11:+:100406945:100433880:Ttc25:8-9-10:12>	ES	E10,E12	E10,E11,E12	-3.34583	-1.91597	1.42987	8.58e-05	0.00258275	0.950555	0.838876	-0.111679
uc009cvs.2,uc009cvt.2:chr6:-:88785907:88791929:Abtb1,BPOZ:<1-2:4	A5SS	E2,E4	E3,E4	-0.154151	-1.21997	-1.06582	8.57646e-05	0.00258275	0.50535	0.772473	0.267123
uc008fsn.1,uc008fso.1,uc008fsp.1,uc008fsq.1,uc008fsr.1:chr18:+:80403536:80422590:Naa10,Txnl4a:8:	ALE	E8,E10,E11	E8,E9	-0.2513	-1.3968	-1.1455	8.68485e-05	0.00259397	0.217761	0.0982245	-0.119537
uc009dsw.1,uc009dsx.1,uc009dsy.1,uc009dsz.1,uc009dtb.1,uc009dtc.1:chr6:+:124959255:124987887:Zfp384:10:13	ES	E10,E13	E10,E11,E13	1.11887	2.27032	1.15145	8.66998e-05	0.00259397	0.194058	0.0750354	-0.119022
uc007ypv.1,uc007ypw.1,uc007ypx.1:chr16:+:20517136:20532593:Dvl3:4-5-6:8	IR	E6,E8	E6,E7,E8	-0.436396	0.630478	1.06687	9.06747e-05	0.00269775	0.531236	0.245588	-0.285648
uc009kkn.2,uc009kko.2,uc009kkp.2,uc012fwv.1,uc012fww.1:chr7:-:148483074:148524682:Deaf1:<2:4-5-6-7-8-10-11-12-13	ES	E2,E4	E2,E3,E4	-0.966707	0.288081	1.25479	9.17048e-05	0.00271786	0.627684	0.399533	-0.228151
uc007bxi.1,uc007bxj.1,uc007bxk.1,uc007bxl.1,uc007bxm.1,uc007bxn.1,uc007bxo.1:chr1:+:89652645:89688997:APG16L,Atg16l1:13-15-16-17-18:20	IR	E18,E20	E18,E19,E20	0.225726	1.56151	1.33578	9.23144e-05	0.00272541	0.309842	0.0863628	-0.22348
uc007zfc.1,uc007zfd.1:chr16:-:38525263:38550266:Ktelc1,Poglut1:<1:3-4-5-6-7-8-9-10-11-12>	A3SS	E1,E3	E1,E2,E3	-0.500121	1.19561	1.69573	9.36344e-05	0.00275378	0.533683	0.153934	-0.379749
uc009nvx.1,uc009nvy.1,uc009nvz.1,uc009nwa.1,uc009nwb.1:chr8:+:125966885:125987799:Def8:<1:6-7-8-9-10-11-12-13-14-15-17>	ES	E1,E6	E1,E3,E4,E6	2.12878	0.672923	-1.45585	9.49507e-05	0.00278184	0.0893536	0.273415	0.184062
uc009afe.2,uc009aff.2:chr5:-:138700885:138705280:BC037034:4-5-6-7-8-9:11-12-13>	ES	E9,E10,E11	E9,E11	-0.331673	1.0766	1.40827	9.55933e-05	0.00279001	0.363965	0.637279	0.273315
uc007qbn.2,uc007qbo.2,uc007qbp.2,uc007qbq.1:chr13:+:34967362:34997933:Prpf4b:<1-2-4-5-6-7-8-9-10-11-12-13:15-16-17	ES	E13,E15	E13,E14,E15	0.604584	2.55719	1.9526	9.76164e-05	0.00283827	0.41253	0.0539204	-0.35861
uc007jwa.2,uc007jwb.2,uc007jwc.2,uc007jwd.2,uc007jwe.2,uc007jwf.2:chr11:-:70482964:70501607:Camta2::9	AFE	E1,E2,E3,E4,E5,E9	E6,E7,E8,E9	0.547401	1.60173	1.05433	0.000100763	0.00288605	0.462936	0.180784	-0.282153
uc008gcl.2,uc008gcm.2,uc008gcn.2:chr19:-:5273920:5295455:Sf3b2::16-17-18-19-20-21-22-23>	AFE	E15,E16	E7,E8,E9,E10,E11,E12,E13,E14,E16	-1.80313	-3.19616	-1.39302	0.000100566	0.00288605	0.713438	0.918559	0.205121
uc009ptl.1,uc009ptm.1,uc009ptn.1,uc009pto.1:chr9:+:56712910:56747677:Cspg4::12-13>	AFE	E11,E12	E1,E2,E3,E4,E5,E7,E8,E9,E12	-1.07958	-2.95309	-1.87351	0.000100029	0.00288605	0.151844	0.556092	0.404248
uc008wky.2,uc008wkz.2,uc008wla.2,uc008wlb.2,uc008wlc.2,uc008wld.2,uc008wle.2,uc008wlf.2:chr5:-:9118867:9161776:Dmtf1::21.22-23-24-25>	AFE	E19,E21	E20,E21	-1.03664	0.995558	2.0322	0.000102944	0.00293482	0.368105	0.0546189	-0.313487
uc007xvv.2,uc007xvx.2,uc007xvy.2,uc007xvz.2,uc007xwb.3,uc009vat.1,uc012aac.1:chr15:+:102301062:102330490:Pcbp2:3-4-5-6-8-9:11	A3SS	E9,E10,E11	E9,E11	-0.448722	-0.0157242	0.432997	0.000104559	0.00296161	0.376549	0.483464	0.106915
uc007upj.2,uc007upk.2,uc007upl.2,uc007upm.2,uc007upn.2,uc007upo.2,uc011zoj.1,uc011zok.1:chr14:+:73542316:73607650:Rcbtb2:10-11:	ALE	E11,E12	E11,E13,E14,E15,E16,E17,E18,E19,E20,E21,E22	-5.58058	-2.31363	3.26696	0.000105135	0.00296698	0.00163707	0.118679	0.117042
uc009pgz.2,uc009pha.1:chr9:+:45820902:46032277:Sik3:<1-2-3-4-5-6-7-8-9-10-11-12-13-14:	ALE	E14,E15	E14,E16,E17,E18,E19,E20,E21,E22,E23,E24,E25,E26	0.0858019	-1.22541	-1.31121	0.000105648	0.00297053	0.817563	0.592443	-0.22512
uc007kqg.1,uc007kqj.1,uc007kqk.1,uc007kql.1:chr11:+:83943173:84215153:Acaca:4-5-6-7-8-9-10-11-13-14-15-16-17-18-19-20-21-22-23-24-25-26-27-28-29-30-31:33-34-35-36-37-38-39-40-41-42-43-44-45-46-47-48-49-50-51-52-53-54-55-56-57-58>	ES	E31,E33	E31,E32,E33	0.0674294	0.871004	0.803574	0.000108083	0.00302791	0.479948	0.252387	-0.227561
uc008lyk.1,uc008lyl.1,uc008lym.1,uc008lyn.1,uc008lyo.1,uc008lyp.1,uc008lyq.1,uc008lyr.1,uc008lys.1,uc012ccp.1:chr2:-:121136296:121180813:Ppip5k1,mKIAA0377::29-30-31-32	AFE	E16,E17,E18,E19,E20,E21,E22,E23,E25,E26,E27,E29	E28,E29	2.1804	3.802	1.62161	0.000112121	0.00312961	0.5506	0.894096	0.343495
uc009prm.1,uc009prn.1,uc009pro.1:chr9:-:54564961:54582335:Wdr61:4:6-7-8-9-10-11-12-13-14>	A3SS	E4,E6	E4,E5,E6	-1.88296	-2.96917	-1.08621	0.000115527	0.00321299	0.869659	0.953829	0.0841697
uc008ent.1,uc008enu.1,uc008env.2,uc008enw.2,uc008enx.2:chr18:+:36720256:36825978:Ankhd1,Eif4ebp3:16:18-19-20-21-22-23-24-25-26-27-28-29-30-31-32-33-34-35	ES	E16,E18	E16,E17,E18	-1.98994	-0.810988	1.17895	0.000118524	0.00328443	0.662797	0.369449	-0.293348
uc009joa.1,uc009job.1,uc009joc.1,uc009jod.1:chr7:-:129130235:129164712:Gga2,mKIAA1080::10-11-12-13-14-15-16-17-18-19>	AFE	E1,E2,E3,E4,E5,E7,E8,E10	E9,E10	1.14597	2.73728	1.59131	0.000123396	0.00340716	0.529874	0.867219	0.337345
uc009ncm.2,uc009ncn.2,uc009nco.2,uc012gjh.1:chr8:+:107829500:107834523:Elmo3::7	AFE	E1,E2,E3,E5,E7	E6,E7	-1.15268	0.659246	1.81193	0.000126046	0.00344315	0.117723	0.430755	0.313032
uc008rol.2,uc008ron.2,uc008roo.2,uc012cyp.1,uc012cyq.1,uc012cyr.1,uc012cys.1,uc012cyt.1,uc012cyu.1:chr3:-:141902548:142058660:Pdlim5:<1-2-3-4:6	A3SS	E4,E6	E4,E5,E6	-0.949047	-1.91371	-0.964668	0.000131064	0.00356754	0.542929	0.745736	0.202808
uc007lml.2,uc007lmm.1,uc007lmn.1,uc011yfg.1:chr11:+:100720664:100746483:Stat5a:<1-3-4-5-6-7-8:10-12-14	IR	E8,E10	E8,E9,E10	0.807291	2.56957	1.76228	0.000135055	0.00362476	0.199335	0.0251547	-0.174181
uc007sen.1,uc007seo.1,uc007sep.1,uc011zfu.1:chr14:+:8835415:8889069:Abhd6::3	AFE	E1,E3	E2,E3	0.90142	2.25469	1.35327	0.000135032	0.00362476	0.146267	0.0522046	-0.0940629
uc007ypv.1,uc007ypw.1,uc007ypx.1:chr16:+:20517136:20532593:Dvl3:<1-2:4-5-6	IR	E2,E4	E2,E3,E4	0.434396	1.53044	1.09604	0.000134725	0.00362476	0.115915	0.0510206	-0.0648943
uc009niy.2,uc009niz.2,uc009nja.1:chr8:-:112195220:112217194:2400003C14Rik:11:13-15>	IR	E11,E13	E11,E12,E13	-1.08871	0.042198	1.13091	0.000133664	0.00362476	0.634445	0.34875	-0.285695
uc008qyr.1,uc008qys.1:chr3:+:108087049:108164429:Sort1:<1-2-3-4-5-6-7-8-9-10-11-12-13-14-15-16-17:19-20-21>	ES	E17,E19	E17,E18,E19	1.59421	0.534057	-1.06015	0.000138363	0.0037006	0.0969992	0.271113	0.174114
uc007tob.2,uc007toc.2,uc007tod.2,uc007toe.2,uc007tof.2,uc007tog.2,uc007toh.2:chr14:-:52693054:52723703:Hnrnpc:5-6:8-9-10	A5SS	E6,E8	E6,E7,E8	1.75813	1.0283	-0.729828	0.000143151	0.00380864	0.12663	0.230037	0.103408
uc008gap.1,uc008gau.1,uc008gav.1,uc008gaw.1,uc008gax.1,uc008gay.1,uc008gaz.1,uc012bgl.1,uc012bgm.1,uc012bgn.1,uc012bgo.1:chr19:-:4742912:4811634:Rbm14,Rbm4,Rbm4b:2:4>	IR	E2,E4	E2,E3,E4	-0.274888	0.817581	1.09247	0.000143394	0.00380864	0.280971	0.110934	-0.170038
uc007xmz.1,uc007xna.1,uc011zyy.1,uc011zyz.1:chr15:-:98420420:98438064:Adcy6:19:21-22-23-24-25-26-27>	IR	E19,E21	E19,E20,E21	0.269732	1.33727	1.06754	0.000144817	0.00381163	0.269101	0.0942879	-0.174813
uc008qxz.1,uc008qya.1,uc008qyb.1,uc012cwa.1:chr3:-:107876979:107889569:Ampd2:6-7-8-9-10-11-12-13-14-15-16-17-18-19-20:22-23>	A5SS	E20,E22	E20,E21,E22	1.48439	3.18867	1.70428	0.000144997	0.00381163	0.166654	0.0385113	-0.128143
uc009ost.1,uc009osu.1,uc009osv.1,uc009osw.1,uc009osx.1,uc012gqf.1:chr9:-:35011805:35018555:Foxred1:7:9-10-11-12-14-15-16-18>	IR	E7,E9	E7,E8,E9	1.26877	2.61879	1.35001	0.000144897	0.00381163	0.142056	0.0292721	-0.112784
uc009sof.2,uc009sog.2,uc009soh.2:chrX:-:7731597:7753307:Tbc1d25:<2.3-4-5-6:8-9>	IR	E6,E8	E6,E7,E8	-1.08417	0.844328	1.92849	0.000145732	0.00381787	0.667997	0.222814	-0.445183
uc009qry.1,uc009qsa.1,uc009qsb.1:chr9:+:75154160:75193478:Gnb5::4-5-6-7-8-9-10-11-12-13-14>	AFE	E2,E4	E3,E4	0.0870114	-20	-20.087	0.000152679	0.00398627	0.821769	1	0.178231
uc009orj.1,uc009ork.1,uc009orl.1,uc009orm.1,uc009orn.1,uc012gpu.1:chr9:-:30957141:31019400:Aplp2:8-10-11-12-13-14:17-18-19-20.21>	ES	E14,E17	E14,E15,E17	0.888709	1.53825	0.649539	0.000153214	0.00398669	0.264056	0.147351	-0.116705
uc009mkv.2,uc009mkw.2,uc009mkx.2,uc009mky.2,uc009mkz.2:chr8:-:86193660:86223078:Pkn1:7-8-9-10-11-12-13-14-15-17:19-20-21-22-23-24-25-26-27>	IR	E17,E19	E17,E18,E19	0.925103	1.6702	0.745095	0.00015376	0.00398737	0.238006	0.122637	-0.115369
uc007jrz.2,uc007jsa.2,uc011xxb.1:chr11:+:69659873:69665560:Plscr3:<2.3:5-6-7-8-9-10-11>	IR	E3,E5	E3,E4,E5	-0.102031	0.902284	1.00431	0.000155542	0.00402001	0.393774	0.179752	-0.214022
uc007hmw.2,uc007hmx.2,uc007hmy.2,uc007hmz.2:chr10:+:127896291:127927230:Smarcc2:20-21-22-23-24-25-26-27-28-29:31>	A5SS	E29,E31	E29,E30,E31	-0.356422	-2.21285	-1.85643	0.000159327	0.00410402	0.391856	0.814138	0.422282
uc008lyk.1,uc008lyl.1,uc008lym.1,uc008lyn.1,uc008lyo.1,uc008lyp.1,uc008lyq.1,uc008lyr.1,uc008lys.1,uc012ccp.1:chr2:-:121136296:121180813:Ppip5k1,mKIAA0377:11-13:	ALE	E13,E14	E13,E16,E17,E18,E19,E20,E21,E22,E23,E25,E26,E27	-1.95375	-4.02716	-2.07341	0.000161791	0.00415354	0.448555	0.0408319	-0.407723
uc007xhr.2,uc007xhs.2,uc007xht.2,uc007xhu.2,uc007xhv.2:chr15:-:90763706:90880379:Kif21a:25-26-27-28:	ALE	E28,E29	E28,E32,E33,E34,E35,E36,E37,E38	-3.28154	-0.954152	2.32739	0.000164333	0.00420474	0.267466	0.831504	0.564038
uc007mst.1,uc011yjb.1:chr11:-:120317917:120319377:1810049H13Rik:<1.2:4>	A5SS	E2,E4	E2,E3,E4	-1.39526	-3.11981	-1.72455	0.000167235	0.00426476	0.789056	0.950386	0.16133
uc009uuh.1,uc009uui.1,uc009uuj.1,uc009uuk.1,uc009uul.1,uc009uum.1:chrX:-:159216850:159267331:Txlng::3	AFE	E1,E3	E2,E3	-0.726355	1.44511	2.17147	0.00016919	0.00430034	0.411526	0.0414739	-0.370052
uc009tad.1,uc009tae.1,uc009taf.1:chrX:+:35953834:35966699:Mcts1:3-4-5:	ALE	E5,E6	E5,E7,E8	-2.67914	-1.44543	1.23371	0.000171968	0.0043422	0.0708648	0.227955	0.15709
uc008qyi.1,uc008qyj.1,uc008qyk.1,uc012cwc.1:chr3:-:107998688:108003752:Cyb561d1::5-6>	AFE	E1,E2,E5	E3,E4,E5	-2.06686	-0.479573	1.58729	0.00017278	0.0043484	0.839243	0.57026	-0.268983
uc007nsd.1,uc007nse.1,uc007nsf.1,uc007nsg.1,uc007nsh.1:chr12:-:70412529:70458153:Sdccag1::28-29-30-31-32	AFE	E15,E16,E17,E18,E19,E20,E21,E22,E25,E26,E28	E27,E28	1.55164	3.2116	1.65996	0.000174554	0.00437867	0.875304	0.980204	0.104901
uc009tux.1,uc009tuy.1,uc009tuz.1,uc009tva.1,uc009tvb.1,uc012hmn.1:chrX:-:95752853:96086364:Ophn1:<2.3.4.5-7-8-10-11-12-13-14:16-18-19-20-21-22-23-24-25-26-27-28-29-30-31-32-33>	IR	E14,E16	E14,E15,E16	0.0809379	2.19411	2.11317	0.000177163	0.00442966	0.162686	0.0109643	-0.151722
uc008cra.2,uc008crb.2,uc008crc.2,uc008crd.2,uc008cre.2,uc008crf.2,uc012aud.1,uc012aue.1:chr17:-:45722148:45736552:Ent1,Slc29a1:7-8-9-10-11-12-13:15-16-17-18-19>	A5SS	E13,E15	E13,E14,E15	0.757673	0.217143	-0.54053	0.00018423	0.00459139	0.313525	0.43661	0.123086
uc009ugh.1,uc009ugi.1:chrX:+:131135824:131141593:Hnrnph2:<1-2:4>	ES	E2,E4	E2,E3,E4	1.69406	0.26045	-1.43361	0.00018609	0.00462274	0.148996	0.377241	0.228246
uc007sxf.1,uc007sxg.1,uc011zig.1,uc011zih.1,uc011zii.1:chr14:-:32050881:32064404:Phf7:<1-2-3-4-5-7-8-9:11-12>	ES	E9,E10,E11	E9,E11	0.629214	-0.458184	-1.0874	0.000186812	0.00462569	0.558672	0.322161	-0.236511
uc007nod.1,uc007noe.1,uc011ylz.1,uc011yma.1:chr12:-:56146647:56181097:2700097O09Rik:<1-2-3-4:6	A5SS	E4,E6	E4,E5,E6	-0.10582	1.35509	1.46091	0.000190008	0.00468972	0.45211	0.164747	-0.287364
uc009blq.1,uc009blr.1,uc009bls.1,uc009blt.1,uc009blu.1:chr6:-:39347819:39370368:Mkrn1:<1-4-5:	ALE	E5,E6	E5,E7,E8	-0.193034	-1.30647	-1.11343	0.000193383	0.00475772	0.650263	0.388869	-0.261394
uc007hte.2,uc007htf.2,uc007htg.2,uc007hth.2,uc007hti.2,uc011xqq.1:chr11:-:3417524:3439295:Smtn:16-17:20-21-22-23-24-25>	ES	E17,E20	E17,E18,E19,E20	-3.65937	-2.27882	1.38055	0.000196144	0.00481022	0.958902	0.841502	-0.1174
uc009mnr.2,uc009mns.2,uc009mnt.2,uc009mnu.2:chr8:+:87380884:87393156:Farsa:<1-2:4-5-6-7-8	A5SS	E2,E4	E2,E3,E4	-1.68228	-3.70969	-2.02742	0.000197611	0.00483077	0.809169	0.980387	0.171218
uc008fth.2,uc008fti.2,uc008ftj.2,uc008ftk.1:chr18:-:80930879:81130797:Atp9b,MMR:<1-2-3-4-5-7-8-9-10-11:13-14-15-16-17-18-19-20-21-22-24-25-26-27-28-29-30	ES	E11,E13	E11,E12,E13	-0.877591	-2.49498	-1.61739	0.000202611	0.00492166	0.631788	0.896722	0.264934
uc007eep.2,uc007eeq.2:chr1:+:196765014:196787486:Cd34:<1-2-3-4-5-6-7:9>	A3SS	E7,E9	E7,E8,E9	0.542141	-0.392257	-0.934398	0.000208355	0.00504521	0.271206	0.476109	0.204903
uc007ave.1,uc007avf.1,uc007avg.1,uc007avh.1,uc007avi.1:chr1:-:43104113:43155482:Tgfbrap1::12-13-14-16-17-18-19>	AFE	E11,E12	E6,E8,E9,E10,E12	-0.51331	-2.34836	-1.83505	0.000212135	0.00512059	0.552099	0.881939	0.32984
uc007swr.2,uc007sws.1:chr14:-:31937690:31942116:2010107H07Rik:<1:	ALE	E1,E2	E1,E3	-3.05757	-1.10317	1.9544	0.000217097	0.00522394	0.0274788	0.205694	0.178215
uc007vgh.1,uc007vgi.1:chr15:+:10415788:10423446:Rad1:<2:4-5-6-8-10>	IR	E2,E4	E2,E3,E4	0.0191295	2.13725	2.11812	0.000218263	0.00523558	0.389767	0.0451808	-0.344587
uc009max.2,uc009may.1:chr8:-:73121388:73132771:Ssbp4:8-9-10-11-12-13-14-15-16-17:19>	IR	E17,E19	E17,E18,E19	0.600204	-0.52368	-1.12388	0.000223245	0.00533842	0.21903	0.443239	0.224209
uc009osa.1,uc009osb.1,uc009osc.1:chr9:+:32443805:32565405:Ets1::5-7-8-9-10-11-12>	AFE	E1,E2,E3,E5	E4,E5	-1.08354	0.0529152	1.13646	0.000224491	0.00535154	0.322643	0.586282	0.26364
uc007txg.2,uc007txh.2,uc007txi.2:chr14:+:55512979:55517764:Pabpn1:7:9.10.11>	IR	E7,E9	E7,E8,E9	0.636797	-0.0340988	-0.670896	0.000235316	0.00558598	0.124079	0.212648	0.088569
uc008ohy.1,uc008ohz.1,uc008oia.1:chr2:+:179759691:179770166:Lsm14b:3-4:6-7-8-9-10-11>	ES	E4,E6	E4,E5,E6	-0.685266	-1.79749	-1.11222	0.000240131	0.00567152	0.569423	0.837605	0.268182
uc007uga.2,uc007ugb.2,uc007ugc.2,uc007ugg.1,uc007ugh.1,uc007ugi.2:chr14:-:62221672:62301210:Dleu2:6-7-9:13>	ES	E9,E11,E13	E9,E13	-0.37949	0.784955	1.16444	0.000242027	0.00569878	0.293695	0.564588	0.270894
uc009stf.2,uc009stg.2,uc009sth.2,uc009sti.2,uc009stk.1,uc012hff.1:chrX:+:20194628:20228031:Rbm10:14:16-17-19-20-21-22-23-24-25-26-27-28-29-30>	IR	E14,E16	E14,E15,E16	-0.374411	1.83394	2.20835	0.000247317	0.00580553	0.416732	0.0833093	-0.333422
uc008ayt.2,uc008ayu.1,uc008ayw.2,uc008ayx.2,uc008aza.2,uc008azb.2,uc008azc.2,uc008azd.2,uc008aze.2,uc008azf.2,uc008azg.1,uc008azh.2,uc012amv.1:chr17:-:25025430:25073922:Eme2,Jsap1,Mapk8ip3:46-47-48-49-50-52:54.55>	IR	E52,E54	E52,E53,E54	-0.532012	0.851225	1.38324	0.000253576	0.0059343	0.556869	0.26444	-0.292429
uc008vye.1,uc008vyf.1,uc008vyg.1,uc008vyh.1,uc008vyi.1,uc012dpx.1,uc012dpy.1:chr4:-:150377763:150418731:Per3:5-6-7-8-9-10:13-14-15-17-18-19	A5SS	E10,E13	E10,E11,E13	1.22668	2.73162	1.50494	0.000258974	0.00604221	0.203939	0.046529	-0.15741
uc008bbc.2,uc008bbd.2,uc008bbe.2,uc008bbf.2,uc008bbg.1:chr17:+:25716118:25799668:Lmf1:2:6-7-10-12-13-14-15-16>	ES	E2,E6	E2,E4,E6	-0.273988	-2.94985	-2.67586	0.00026081	0.0060666	0.590283	0.985381	0.395098
uc007mpg.2,uc007mph.2,uc011yio.1:chr11:+:118289770:118313096:C1qtnf1::4-5-6>	AFE	E1,E4	E2,E4	0.0509581	1.87225	1.8213	0.000266393	0.00615913	0.499303	0.138017	-0.361286
uc007yll.2,uc007ylm.2,uc007yln.2,uc007ylo.2,uc007ylp.2,uc007ylq.1:chr16:+:17619446:17644923:Smpd4,mKIAA1418::8.9-11-12-13-14	AFE	E6,E8	E7,E8	-0.175891	1.4816	1.6575	0.000266037	0.00615913	0.169274	0.047576	-0.121698
uc007qix.1,uc007qiy.1:chr13:-:49298319:49311395:1110007C09Rik:<2:4-5-6-7-8>	ES	E2,E4	E2,E3	3.29756	1.62363	-1.67394	0.000267383	0.00616347	0.0245055	0.114351	0.0898452
uc007ghc.2,uc007ghd.2,uc007ghe.2,uc011xjf.1:chr10:+:80755716:80782719:Pip5k1c:<1-2-3-5-6-7-8-9-10-11-12-13-14-15-16-17:20>	ES	E17,E20	E17,E19,E20	0.962782	-0.154461	-1.11724	0.000271542	0.00624058	0.218424	0.469667	0.251243
uc007obi.1,uc007obj.1:chr12:+:81891545:81981820:4933426M11Rik:<1-2:4-5-6-7>	ES	E2,E4	E2,E3,E4	1.94591	0.454255	-1.49165	0.000273043	0.00625636	0.104675	0.346727	0.242052
uc009tmf.2,uc009tmg.2,uc009tmh.2,uc009tmi.1,uc012hkg.1,uc012hkh.1:chrX:+:70918471:70927839:CRT,Slc6a8::11-12-13-14-15.16-18-19-20-21>	AFE	E10,E11	E8,E9,E11	-0.390139	-2.6627	-2.27256	0.000274477	0.0062705	0.820249	0.985298	0.165049
uc007kii.1,uc007kij.1,uc007kik.1:chr11:+:77990212:77994274:Tlcd1:<1-2.3:5-6-7.8.9.10>	A5SS	E3,E5	E3,E4,E5	-1.23044	-0.371877	0.858562	0.000280247	0.00638331	0.691433	0.475409	-0.216024
uc008iho.1,uc008ihp.1,uc012bpd.1:chr2:+:10002238:10014328:Kin:4:7>	IR	E4,E7	E4,E5,E6,E7	-0.0289816	0.823473	0.852455	0.00029509	0.00665683	0.173759	0.0599604	-0.113799
uc008nwp.1,uc008nwq.1:chr2:+:164704867:164716937:BC060988,Pcif1:<1.2-4:	ALE	E4,E5	E4,E6,E7,E8,E9,E10,E11,E12,E13,E14,E15,E16,E17,E18,E19,E20	-0.384904	-1.44707	-1.06217	0.000297459	0.00665683	0.862472	0.666665	-0.195807
uc009btb.2,uc009btc.2,uc009btd.1:chr6:-:47480272:47545337:Ezh2:<2-3-4.5-6-7-8-9-10-12-13-14-15-16:18-19-20-21-22-23>	ES	E16,E18	E16,E17,E18	-0.722739	-2.55044	-1.8277	0.000295129	0.00665683	0.593307	0.912321	0.319014
uc009ikh.2,uc009iki.2,uc009ikj.2,uc009ikk.2,uc012fpq.1,uc012fpr.1:chr7:-:105499177:105509838:Tsku:<1.2.3:7>	ES	E3,E7	E3,E5	2.75684	0.885519	-1.87132	0.000296611	0.00665683	0.0718467	0.214661	0.142814
uc009nvl.1,uc009nvm.1,uc009nvn.1,uc009nvo.1,uc009nvp.1,uc009nvq.1,uc009nvr.1,uc012gmr.1:chr8:+:125897652:125928073:Tcf25,mKIAA1049:21:23	IR	E21,E23	E21,E22,E23	-3.18485	-1.75292	1.43193	0.000297153	0.00665683	0.845228	0.504434	-0.340794
uc009niy.2,uc009niz.2,uc009nja.1:chr8:-:112195220:112217194:2400003C14Rik:<1-2-3-4-5-6-7:9	IR	E7,E9	E7,E8,E9	0.527539	1.61149	1.08395	0.000304732	0.00679977	0.144487	0.0478228	-0.096664
uc009rtm.1,uc009rtn.1,uc009rto.1,uc009rtp.1,uc012hbg.1:chr9:+:110034527:110142682:Smarcc1:<1-2-3-4-5-6-7-8-9-10-11-12-13-14-15-17-18-19-20-21-22-23-24-25-26-28-29:	ALE	E29,E30	E29,E32	0.261343	-1.03345	-1.2948	0.000314037	0.00698708	0.927638	0.792527	-0.135111
uc009kcm.1,uc009kcn.1:chr7:-:140019143:140044330:Mettl10:5:7>	ES	E5,E7	E5,E6,E7	-3.19594	-1.25931	1.93663	0.000316871	0.00702977	0.971172	0.67449	-0.296682
uc009fxz.1,uc009fya.1,uc009fyb.1:chr7:+:28964501:28972313:Dyrk1b:3-4-5-6-7-8-9:11-12-13>	A3SS	E9,E10,E11	E9,E11	1.13349	-0.150563	-1.28406	0.000318454	0.00704453	0.693979	0.328199	-0.365781
uc009clu.2,uc009clv.2,uc009clw.1,uc009clx.1:chr6:-:83001261:83005267:HtrA2,Htra2:<1.2:4-5-6	IR	E2,E4	E2,E3,E4	0.449632	2.28716	1.83753	0.000332058	0.00732435	0.2767	0.0523884	-0.224312
uc009ali.1,uc009alj.1,uc009alk.1,uc009all.1,uc009alm.1,uc012egm.1:chr5:-:144956217:144984447:Tecpr1,mKIAA1358:<1-2-3:5-6-8-10-11-13-14-16-18-19-20-21-22-23-24-25-26-27-28-29-31-32>	IR	E3,E5	E3,E4,E5	-0.616315	0.412392	1.02871	0.000333045	0.00732507	0.532934	0.253789	-0.279144
uc008tts.2,uc008ttt.2,uc008ttu.2,uc008ttv.2,uc008ttw.2,uc008ttx.1,uc008tty.2:chr4:+:97248633:97785567:Nfia::4-6-7-8-9	AFE	E2,E4	E3,E4	-1.61892	-3.31115	-1.69223	0.000340422	0.00746594	0.77272	0.948997	0.176277
uc007gct.1,uc007gcu.1:chr10:+:79792914:79799186:Reep6:<1-2-3-4:6>	ES	E4,E6	E4,E5,E6	0.86033	-0.404004	-1.26433	0.000360198	0.00787714	0.321783	0.527999	0.206216
uc008ekj.1,uc008ekk.1,uc008ekl.1,uc008ekm.2,uc012bax.1,uc012bay.1:chr18:+:34568142:34602442:Pkd2l2:<2-3-4-5-6:	ALE	E6,E10	E6,E11	0.614513	2.40262	1.78811	0.000364276	0.00794369	0.258295	0.629462	0.371167
uc009qri.1,uc009qrj.2,uc009qrk.2,uc009qrl.2,uc009qrm.2,uc012gww.1:chr9:+:74800690:74880275:BC031353:9-10-11-12-13-14-15-16-17:20-21>	A5SS	E17,E20	E17,E18,E20	-0.0875273	0.859869	0.947396	0.000370011	0.00804591	0.440295	0.216069	-0.224226
uc009pic.2,uc009pid.2,uc009pie.2,uc009pif.2,uc009pig.2,uc009pih.2:chr9:-:48296801:48303435:Rbm7:5:8.9>	A5SS	E5,E8	E6,E8	1.87173	1.02722	-0.844512	0.000371517	0.00805583	0.129028	0.260569	0.13154
uc008lfv.2,uc008lfw.2,uc012bzr.1,uc012bzs.1:chr2:-:93041916:93174644:Tspan18:3:	ALE	E3,E4	E3,E6,E7,E8,E9,E10,E11,E12,E13	0.575729	-0.390602	-0.966331	0.000380941	0.0082369	0.947409	0.87485	-0.0725586
uc009ost.1,uc009osu.1,uc009osv.1,uc009osw.1,uc009osx.1,uc012gqf.1:chr9:-:35011805:35018555:Foxred1:4:7	IR	E4,E7	E4,E5,E6,E7	0.704645	1.75029	1.04564	0.000386856	0.0083413	0.17467	0.0354707	-0.139199
uc008xer.2,uc008xes.2,uc008xet.1,uc008xeu.2,uc008xev.1,uc008xew.2,uc008xex.1:chr5:-:36833252:36928875:Tbc1d14,kiaa1322::12-13-14-15-16-17-18-19-20.21-23-24>	AFE	E11,E12	E7,E9,E12	0.0467799	-1.66133	-1.70811	0.000388859	0.00836101	0.284876	0.54747	0.262594
uc008dbd.2,uc008dbe.1:chr17:-:56262507:56279766:Sema6b::3-4-5-6-7-8-9-10-11-12-13-14-15-16-17-18>	AFE	E1,E3	E2,E3	-2.05839	-0.405465	1.65292	0.000399289	0.00851842	0.800494	0.545074	-0.25542
uc008iie.2,uc008iif.2,uc008iig.2,uc008iih.2,uc008iii.1,uc008iij.2,uc008iik.2,uc008iil.2,uc008iim.2,uc008iin.2:chr2:-:11393057:11475556:Pfkfb3::4-5-6-7-8-9-10-11-12-13-14-15	AFE	E1,E4	E2,E4	-3.63803	-1.51794	2.12009	0.000400208	0.00851842	0.902676	0.544974	-0.357702
uc008ytc.2,uc008ytd.2,uc008yte.2,uc012ebh.1:chr5:+:112772114:112807444:Hps4:4-5-6-7-8-9-10-11-12:14-15-16-17>	IR	E12,E14	E12,E13,E14	-1.75402	0.182322	1.93634	0.000400619	0.00851842	0.704208	0.455091	-0.249117
uc007isy.1,uc007isz.1,uc007ita.1,uc007itb.1,uc007itc.1,uc011xuj.1:chr11:-:50712213:50729663:Zfp2:<1:3-4	A3SS	E1,E3	E1,E2,E3	0.62253	-1.28093	-1.90346	0.000415349	0.00880724	0.386406	0.731543	0.345137
uc007qbe.2,uc007qbf.2:chr13:+:34254845:34270041:Psmg4:<1:3>	ES	E1,E3	E1,E2,E3	-0.155663	-1.38601	-1.23035	0.000422292	0.00888337	0.480299	0.782424	0.302125
uc007ssq.1,uc007ssr.1,uc007sss.1,uc007sst.1,uc007ssu.1:chr14:-:27232660:27354417:Slmap,mKIAA1601:4-5-6-7-8-9-10-11-12-13:15	ES	E13,E15	E14,E15	-1.70294	-0.290294	1.41264	0.000420598	0.00888337	0.871929	0.485109	-0.386821
uc008ruf.2,uc008rug.2,uc008rui.2,uc012czq.1,uc012czr.1,uc012czs.1,uc012czt.1:chr3:-:153570252:153575957:Rabggtb:5-7-8:10-11	ES	E8,E10	E8,E9,E10	1.66022	2.37628	0.71606	0.000425821	0.00888337	0.128746	0.0575257	-0.0712206
uc009dms.2,uc009dmt.2,uc009dmu.2,uc009dmv.2,uc012ers.1,uc012ert.1,uc012eru.1,uc012erv.1:chr6:-:119873986:119988673:Wnk1:<1-2-3-4-6-7-8-9-12-13:18-19-20-21-22-23-24-25	ES	E13,E18	E13,E17	0.29731	-0.504954	-0.802264	0.000424976	0.00888337	0.222941	0.432172	0.209231
uc009ulk.1:chrX:+:137491455:137598813:Atg4a:<1-2:4-5-6-7-8-9-10-11-12-13>	ES	E2,E4	E2,E3,E4	-2.87788	-1.01927	1.85861	0.000422887	0.00888337	0.967582	0.706959	-0.260623
uc008nng.1,uc008nnh.1,uc008nni.1,uc008nnj.1,uc008nnk.1,uc008nnl.1,uc008nnm.1,uc008nnn.1,uc008nno.1,uc012cht.1:chr2:+:156246787:156368950:Epb4.1l1:18:21-22-23-24-25-26-27>	ES	E18,E21	E18,E20,E21	-1.08723	0.0285945	1.11583	0.000435657	0.00903811	0.56239	0.297058	-0.265332
uc009sdp.1,uc009sdq.1,uc009sdr.1,uc009sds.1,uc009sdt.1:chr9:+:121628298:121665959:Nktr:9:13-14	ES	E9,E11,E13	E9,E13	-0.146842	-1.86195	-1.71511	0.000434789	0.00903811	0.41459	0.126551	-0.288039
uc007grp.2,uc007grq.2,uc007grr.2,uc007grs.2,uc011xlh.1:chr10:-:87935557:87966715:Chpt1:11:	ALE	E11,E12	E11,E13	0.0293569	1.71596	1.6866	0.000438578	0.00907418	0.0916104	0.402114	0.310503
uc007pql.2,uc011ywr.1:chr13:-:21534043:21545596:Zfp187::4-5>	AFE	E1,E2,E4	E3,E4	-0.666743	0.704624	1.37137	0.000441339	0.00909976	0.094508	0.326196	0.231688
uc008gkk.2,uc008gkl.2,uc008gkm.2,uc012bhu.1:chr19:-:7300157:7315712:AK209302,Naa40:<1-2-3-4:7.8	IR	E4,E7	E4,E5,E6,E7	0.297256	1.25367	0.956418	0.000442628	0.00909976	0.400174	0.169865	-0.230309
uc009bhv.1,uc009bhw.2,uc009bhx.2,uc009bhy.2:chr6:-:34821770:34828065:3110062M04Rik::4-5-7>	AFE	E1,E4	E3,E4	-0.310155	1.53393	1.84409	0.00044337	0.00909976	0.393649	0.216738	-0.176912
uc007rjr.1:chr13:-:91074953:91363592:Atg10:<1-2-3:5	ES	E3,E5	E3,E4,E5	-2.12452	-4.0336	-1.90908	0.000446002	0.00910509	0.870175	0.987783	0.117609
uc007sla.2:chr14:-:21852963:21871664:Ap3m1:<1-2:4-5-6-7-8-9>	ES	E2,E4	E2,E3,E4	-1.71172	-4.04622	-2.3345	0.000445059	0.00910509	0.785804	0.968991	0.183187
uc007gke.1,uc011xjs.1:chr10:+:82448241:82658636:Chst11:<1.2:4-5>	A5SS	E2,E4	E2,E3,E4	-0.701906	0.657291	1.3592	0.000448783	0.0091217	0.537423	0.376692	-0.160731
uc007lyo.2,uc007lyp.2:chr11:-:106124484:106134286:Smarcd2::3-4-5-6-7-8-9-10-11-12-13-14>	AFE	E1,E3	E2,E3	0.0329521	1.47897	1.44602	0.000450381	0.0091217	0.804126	0.326097	-0.478029
uc009qyk.2,uc009qyl.2,uc009qym.2,uc009qyn.2:chr9:-:88271584:88333789:Snx14:<1-2-3-4-5-6-7-8-9-10-11-12-13-14-15:18-19-20-21-22-23-24-25-26-27-28-29-30>	ES	E15,E18	E15,E16,E18	0.526879	1.68089	1.15401	0.000449374	0.0091217	0.341706	0.111278	-0.230427
uc009jrg.1,uc009jrh.1,uc009jri.1,uc009jrj.1,uc009jrk.1,uc009jrl.1,uc009jrm.1,uc009jrn.1:chr7:-:133610507:133618644:Psmbeta,Sh2b1:10-11-12:14-15>	A5SS	E12,E14	E12,E13,E14	0.136101	0.991191	0.85509	0.000454928	0.00918954	0.42247	0.224962	-0.197508
uc007bnp.1,uc007bnq.1,uc007bnr.1,uc007bns.1:chr1:-:75131788:75139271:1810031K17Rik::5-6-7-8-9-10-11-12>	AFE	E3,E5	E4,E5	-1.07711	-0.143101	0.934005	0.000474805	0.0094665	0.944531	0.848212	-0.0963188
uc008qoa.2,uc008qob.2,uc008qoc.2,uc008qod.2:chr3:-:96515817:96531362:Polr3c:<1-2-3:5-8-9-10-12-13-14-15-16-17-18-19>	IR	E3,E5	E3,E4,E5	0.57669	1.81636	1.23967	0.000472964	0.0094665	0.292963	0.0813344	-0.211628
uc008sho.1,uc008shp.1,uc008shq.1,uc008shr.1:chr4:-:40629110:40650220:Aptx:3:5-6-7-8-9-10>	A3SS	E3,E5	E3,E4,E5	-0.61413	-1.58004	-0.965908	0.000474495	0.0094665	0.639414	0.827223	0.187809
uc009aoh.1,uc009aoi.1:chr5:-:148373771:148537564:Flt1:<1-2-3-4-5-6-7-8-9-10-11-12-13:	ALE	E13,E14	E13,E15,E16,E17,E18,E19,E20,E21,E22,E23,E24,E25,E26,E27,E28,E29,E30,E31	-0.428368	-1.22532	-0.796948	0.000473976	0.0094665	0.697344	0.495572	-0.201772
uc007qcw.2,uc007qcx.2,uc007qcy.2,uc007qcz.1,uc007qda.2,uc007qdb.2:chr13:+:37917906:38043874:Rreb1:9-10-11-12-13-14:17-18>	ES	E14,E17	E14,E16,E17	-1.45655	-0.867823	0.588729	0.000487785	0.00967503	0.736212	0.600367	-0.135845
uc009fym.1,uc009fyn.1,uc009fyo.1,uc009fyp.1,uc009fyq.1,uc009fyr.1:chr7:-:29144622:29157681:Clg,Plekhg2:8-9-10-11-12-13-14-15-16-17-18-19:21-22	IR	E19,E21	E19,E20,E21	-0.122602	1.38629	1.5089	0.00048711	0.00967503	0.488225	0.150597	-0.337628
uc007sly.1,uc007slz.2,uc007sma.2:chr14:+:22838933:23875310:1700112E06Rik:<1-2-3-4-5:	ALE	E5,E6	E5,E8,E9	-1.95214	-0.224707	1.72743	0.000490708	0.00970793	0.0298272	0.132797	0.10297
uc009cvs.2,uc009cvt.2:chr6:-:88785907:88791929:Abtb1,BPOZ:3:5-6-7-8-9-10	ES	E3,E5	E3,E4	-1.43508	-3.26767	-1.83258	0.000495371	0.00977499	0.779472	0.965624	0.186152
uc009izg.1,uc012frq.1:chr7:-:112893360:112900721:Tpp1:<1-2-3:5-6-7-8-9-10-11-12-13-14>	IR	E3,E5	E3,E4,E5	0.521226	1.92199	1.40076	0.000508535	0.00993262	0.0876773	0.0174982	-0.0701791
uc007giy.2,uc007giz.2:chr10:-:81084530:81090353:Sirt6::3-4-5-6-7-8-9.10.11>	AFE	E1,E3	E2,E3	-0.949081	1.0116	1.96068	0.00051762	0.0100844	0.465656	0.394011	-0.071645
uc009vdc.1:chr4_random:+:109801:130134:Dhrsx:<1-2-3:5-6-7>	ES	E3,E5	E3,E4,E5	-2.70078	-1.2075	1.49328	0.000521934	0.0101427	0.901709	0.695436	-0.206272
uc009fxo.2,uc009fxp.1,uc012fgo.1:chr7:-:28826720:28835111:Psmc4:<1-3-4-5-6-7-8-9.10:12-13-14>	IR	E10,E12	E10,E11,E12	1.26014	2.19136	0.93122	0.000523264	0.0101429	0.142566	0.047634	-0.0949316
uc009nne.2,uc009nnf.2,uc009nng.2:chr8:-:114517339:114535205:Kars:<1:3	ES	E1,E3	E1,E2,E3	0.779256	1.9365	1.15725	0.000526623	0.0101823	0.278028	0.107724	-0.170304
uc007zps.1,uc007zpt.1:chr16:-:62734677:62786542:Nsun3:<1-2:4-5-6-7>	A3SS	E2,E4	E2,E3,E4	0.559616	-1.22995	-1.78956	0.000529078	0.0101834	0.206586	0.656845	0.450259
uc008jfx.1,uc008jfy.1,uc008jfz.1:chr2:+:32442607:32455994:St6galnac4:7:9.10>	IR	E7,E9	E7,E8,E9	0.712195	2.10684	1.39465	0.000536287	0.0102913	0.0809211	0.0211608	-0.0597602
uc007xqh.2,uc007xqi.2:chr15:-:99608898:99705887:Lima1::5-6-7-8-9-10-11-12>	AFE	E1,E2,E3,E5	E4,E5	0.367434	2.58965	2.22221	0.000542259	0.0103542	0.510947	0.916362	0.405415
uc007dbx.2,uc007dby.2,uc007dca.2,uc007dcb.2,uc007dcc.2,uc011wub.1,uc011wuc.1:chr1:+:157882793:157915989:Ifrg15,Tor1aip2:<5:7	ES	E5,E7	E5,E6	1.31648	0.676716	-0.639768	0.000550126	0.0104783	0.174126	0.286504	0.112378
uc008gpw.2,uc008gpx.2,uc008gpy.2,uc008gpz.2,uc008gqa.2:chr19:+:10599733:10622225:Cpsf7:<1-2-3:5-6	ES	E3,E5	E3,E4,E5	0.0689828	1.20373	1.13474	0.000557035	0.0105837	0.434297	0.197741	-0.236556
uc008oxk.2,uc008oxl.2,uc008oxn.2:chr3:+:33919000:33968266:Fxr1:14-15-16:18	ES	E16,E18	E16,E17,E18	-0.850278	0.112988	0.963267	0.000567417	0.0107543	0.609261	0.381829	-0.227432
uc008eal.1,uc008eam.1:chr18:+:9958177:9995482:Thoc1:<1-2-3-4-5-6-8-9-10-11-12-13-14:16-17-18-19-20-21-22-23>	IR	E14,E16	E14,E15,E16	-0.908856	-0.0870114	0.821844	0.000577534	0.0109191	0.524233	0.343976	-0.180257
uc007kxv.1,uc007kxw.1,uc007kxx.1,uc007kxy.1,uc007kxz.1,uc007kya.1,uc007kyb.1,uc007kyc.1,uc007kyd.1,uc011ycs.1,uc011yct.1:chr11:+:93857404:93987396:JSAP2,Spag9::7-10-11-13-17-18-19-20-21-22-23-24-25-26-27-28-30-31-32-33-34-35	AFE	E4,E5,E7	E6,E7	-0.25482	1.61643	1.87125	0.000592969	0.0111834	0.600334	0.934734	0.334401
uc008nks.1,uc008nkt.1,uc008nku.1,uc008nkv.1:chr2:+:155343778:155411460:Acss2:<1-2-4-6:8	IR	E6,E8	E6,E7,E8	1.18367	2.07983	0.896164	0.000599111	0.0112715	0.169127	0.0521478	-0.116979
uc007dtg.2,uc007dth.2,uc007dti.2,uc007dtj.2,uc007dtk.2,uc007dtl.2:chr1:-:176989206:177422676:RGS7,Rgs7:<1-2-3-4-5-6-7-8-9-10-11-12-13:15-16	ES	E13,E15	E13,E14,E15	-3.43658	-1.69502	1.74156	0.000610005	0.0114484	0.981843	0.820611	-0.161232
uc009cio.1:chr6:+:72364326:72380701:Ggcx:<1-2-3-4-5-6-7-8-9:11-12-13-14-15>	ES	E9,E10,E11	E9,E11	2.10254	20	17.8975	0.00062265	0.0116289	0.884136	1	0.115864
uc009ndp.1,uc009ndq.1,uc009ndr.1,uc009nds.1,uc009ndt.1,uc012gjn.1:chr8:-:108219759:108224995:Acd::11	AFE	E10,E11	E8,E9,E11	0.419854	-1.50408	-1.92393	0.000621564	0.0116289	0.41945	0.766776	0.347325
uc007ypz.1,uc007yqa.1:chr16:+:20548675:20561676:Abcf3:<1-2-3-4-5-6-7-8-9-10-11-12:14.15-16-17-18-19-20-21-22-23>	A3SS	E12,E14	E12,E13,E14	-2.0511	-3.48999	-1.43889	0.000646777	0.012021	0.86687	0.978992	0.112122
uc008mja.2,uc008mjb.2,uc012cef.1,uc012ceg.1:chr2:+:130250055:130270005:Vps16,mVps16:<1-2-3-4-5-6-7:9	IR	E7,E9	E7,E8,E9	0.234299	1.53385	1.29955	0.000654358	0.0121325	0.343286	0.116749	-0.226536
uc007eth.2,uc007eti.2,uc007etj.2,uc007etk.2,uc007etl.2,uc007etm.2,uc007etn.2,uc007eto.2,uc011xcg.1,uc011xch.1:chr10:-:30348816:30522913:Ncoa7::16-17-18-20-22.23.24>	AFE	E1,E3,E4,E5,E6,E7,E8,E10,E11,E12,E13,E14,E16	E15,E16	0.192253	1.20737	1.01511	0.000656827	0.0121489	0.101879	0.243415	0.141536
uc008hya.2,uc008hyb.2,uc008hyc.2,uc008hyd.2,uc008hye.2,uc008hyf.2,uc008hyg.2,uc008hyh.2,uc008hyi.2,uc008hyj.2,uc008hyk.2,uc008hyl.2,uc008hyn.2,uc008hyo.2,uc012bnp.1:chr19:+:55816299:56008145:Tcf7l2:<1-2-3:5-8-10.11-12	ES	E3,E5	E3,E4,E5	-0.590669	0.32424	0.914908	0.000663535	0.0122435	0.560687	0.31675	-0.243938
uc008vmf.1,uc008vmg.1,uc008vmh.1,uc008vmi.1,uc008vmj.2,uc008vmk.2,uc008vmm.2,uc012dnt.1:chr4:+:138908507:139045447:C230096C10Rik,Ubr4::16-17-18-19	AFE	E1,E2,E3,E4,E5,E6,E7,E8,E9,E10,E11,E12,E13,E16	E15,E16	-0.0589327	1.1996	1.25853	0.000674149	0.0123798	0.147696	0.420453	0.272757
uc007uzq.1,uc007uzr.1,uc007uzs.1,uc007uzt.1,uc007uzu.1,uc007uzv.1,uc007uzw.1:chr14:+:120674890:120830920:Mbnl2:<1-4-5-6-7:10	ES	E7,E10	E7,E9,E10	1.31265	0.0844679	-1.22818	0.000682014	0.0124834	0.126104	0.449556	0.323452
uc007wkh.1,uc007wki.1,uc007wkj.1,uc007wkk.1,uc007wkl.1,uc011zuv.1:chr15:+:76307874:76331402:Hsf1:<1-2-3-4-5-6:9-10-11	IR	E6,E9	E6,E7,E8,E9	1.4718	2.48077	1.00896	0.000683043	0.0124834	0.138924	0.0559821	-0.0829424
uc008qtl.1,uc008qtm.1,uc008qto.1,uc008qtp.1:chr3:-:103604527:103613310:Dclre1b:<1.2:4	IR	E2,E4	E2,E3,E4	0.557075	2.64798	2.0909	0.000687867	0.012512	0.157545	0.0177544	-0.13979
uc009lhs.1,uc009lht.1,uc009lhu.1,uc009lhv.1,uc009lhw.1:chr8:+:28153026:28166604:Prosc:6:	ALE	E6,E7,E8	E6,E9,E10,E12,E13	-2.12755	-3.37876	-1.25121	0.000686411	0.012512	0.276054	0.0785229	-0.197531
uc007yli.2,uc012abt.1,uc012abu.1:chr16:+:17561977:17577893:P2rx6,mP2XM:<1-2-3-4-5:7	ES	E5,E7	E5,E6,E7	-4.34141	-1.81929	2.52212	0.000689632	0.0125145	0.987724	0.831153	-0.156571
uc007jem.2,uc007jen.2,uc007jeo.2,uc007jep.2,uc007jer.2,uc007jes.2,uc007jet.2,uc011xvo.1:chr11:+:59475996:59594362:Mprip:21-22-23-24-25-26-27:29>	ES	E27,E29	E27,E28,E29	-1.27133	-1.96538	-0.694042	0.000695081	0.012554	0.741248	0.852772	0.111524
uc009hgw.2,uc009hgx.2:chr7:+:73007021:73195272:Pcsk6:<1-2-3-4-5-6-7-8-9-10-11-12-13-14:16-17-18-19-20-21-22>	ES	E14,E16	E14,E15,E16	-1.83377	-0.700801	1.13297	0.000706024	0.0126251	0.832251	0.636395	-0.195856
uc009omn.1,uc009omo.1,uc009omp.1,uc009omq.1,uc009oms.1,uc009omt.1:chr9:-:21604623:21657079:Dock6:<1-2-3-4-5-6-8-9-10-11-12-13-14-15-17-18-19-20-21-22-23-24:27-28-31-32-33-34-35-36-37-38-39-40-41-42-43-44-45-46-47-48-49-50-51-52-53-54>	ME	E24,E25,E27	E24,E26,E27	1.11696	-0.121361	-1.23832	0.000704974	0.0126251	0.582076	0.316285	-0.265791
uc009pee.1,uc009pef.1,uc009peg.1,uc009peh.1:chr9:-:44494390:44543277:Phldb1:12-13-14-18-19-20-21:23-24-25-26-28>	A5SS	E21,E23	E21,E22,E23	0.375671	1.22447	0.848797	0.000701766	0.0126251	0.376965	0.181286	-0.19568
uc008lqs.2,uc008lqt.2,uc008lqu.2,uc008lqv.2,uc008lqw.2,uc008lqx.2,uc008lqy.2,uc008lqz.1:chr2:-:115686999:115890794:Meis2,meis2a:16:18>	ES	E16,E18	E16,E17,E18	-0.808336	0.19948	1.00782	0.000719795	0.0128194	0.722538	0.392261	-0.330277
uc007vex.1,uc007vey.2,uc007vez.2,uc007vfa.2:chr15:-:8584123:8660807:Slc1a3::10-11-12-13-14-15>	AFE	E1,E2,E4,E8,E10	E9,E10	2.37253	5.05841	2.68589	0.000726451	0.0128781	0.871224	0.995565	0.124341
uc008tsw.2,uc008tsx.2,uc008tsy.2,uc012dhd.1:chr4:+:95224197:95593630:Fggy:11:	ALE	E11,E12	E11,E13,E14	-0.843429	-2.61496	-1.77153	0.000725168	0.0128781	0.0788501	0.0124096	-0.0664405
uc007dsc.1,uc007dsd.1,uc007dse.1,uc007dsf.1,uc007dsg.1,uc007dsh.1,uc007dsi.2,uc007dsj.1:chr1:-:175850533:175872623:Ifi203:7-8:10-12>	IR	E8,E10	E8,E9,E10	-1.45012	0.259711	1.70983	0.00073558	0.0129244	0.496138	0.147828	-0.348311
uc008oid.1,uc008oie.1,uc008oif.1,uc008oig.1,uc008oih.1,uc008oii.1,uc012clv.1,uc012clw.1:chr2:+:179805297:179820607:Gtpbp5:8-9:11.12	A5SS	E9,E10,E11	E9,E11	-0.356986	-1.56536	-1.20837	0.000734684	0.0129244	0.348948	0.130101	-0.218847
uc009gfa.1,uc009gfb.1,uc009gfc.1,uc009gfd.1,uc012fhs.1:chr7:+:31348358:31352981:Tmem149,U2af1l4,U2af26:<1.2:4-5-6-7-9-10-11.12	A5SS	E2,E4	E2,E3,E4	1.25381	2.16353	0.909728	0.000735793	0.0129244	0.215688	0.0948445	-0.120844
uc009kwd.1,uc009kwe.1,uc012fzo.1,uc012fzp.1:chr8:-:12614276:12672100:Tubgcp3,mKIAA0357::12-13-14-15	AFE	E11,E12	E1,E2,E3,E4,E5,E6,E7,E8,E9,E10,E12	-2.08302	-4.84952	-2.7665	0.000731685	0.0129244	0.834798	0.994471	0.159673
uc009hxz.1,uc009hya.1,uc009hyb.1:chr7:-:86278653:86293946:Mfge8:<1-2-3:	ALE	E3,E5	E3,E7,E8,E9,E10,E11,E12	-2.21136	-1.13969	1.07167	0.000740239	0.0129621	0.566833	0.812381	0.245548
uc009lfs.1,uc009lft.1,uc009lfu.1,uc009lfv.1:chr8:-:26265023:26351373:Tacc1::3	AFE	E1,E3	E2,E3	-1.12362	0.971913	2.09553	0.000741319	0.0129621	0.49406	0.122374	-0.371686
uc008gkk.2,uc008gkl.2,uc008gkm.2,uc012bhu.1:chr19:-:7300157:7315712:AK209302,Naa40::13>	AFE	E10,E11,E13	E12,E13	0.413562	1.71079	1.29723	0.000745615	0.0130076	0.712667	0.883193	0.170526
uc008onc.1,uc008ond.1,uc008one.1,uc008onf.1,uc008ong.1:chr2:-:181423127:181428629:Rgs19:<1:4-5-6	ES	E1,E4	E1,E3	-0.847298	0.71784	1.56514	0.000747496	0.0130108	0.581391	0.382447	-0.198945
uc007klw.2,uc007kly.2,uc007klz.2,uc007kma.2,uc007kmb.2,uc007kmc.2:chr11:+:80196780:80219235:Zfp207:16:	ALE	E16,E17	E16,E18,E19,E20,E21,E22	-0.367977	1.11398	1.48196	0.000756064	0.0131302	0.645035	0.958336	0.3133
uc008xqa.1,uc008xqb.1,uc008xqc.1,uc008xqd.1,uc008xqe.1:chr5:-:68009379:68238670:Atp8a1:<10.11-12-13-14-15-16-17:19-20-21-22-23-24-25-26-27-28-30-31-32-33-34-35-36-37-38-39-40-41>	ES	E17,E19	E17,E18,E19	2.58597	0.817377	-1.76859	0.000764538	0.0132474	0.0367987	0.254583	0.217784
uc007fxm.1,uc007fxn.1:chr10:-:77649470:77707387:Trappc10::13-14-15	AFE	E12,E13	E1,E2,E3,E4,E5,E6,E7,E8,E9,E10,E11,E13	-2.12521	-3.90077	-1.77556	0.000766552	0.0132524	0.86681	0.980372	0.113562
uc008cjt.1,uc008cju.1,uc008cjv.1,uc008cjw.1,uc008cjx.2,uc012asi.1,uc012asj.1:chr17:-:36175353:36258355:H2-T10,H2-T22,H2-T9:15-16.17-18-19:21-22-23-24>	ES	E19,E21	E19,E20,E21	-3.52735	-2.26866	1.25869	0.000771155	0.0132618	0.96703	0.873169	-0.0938618
uc008qsg.2,uc008qsh.2,uc008qsi.2,uc008qsj.2,uc008qsk.1,uc008qsl.2:chr3:+:102824468:102862112:Csde1,mKIAA0885:7:11-13-14-15-16.17-18-19-20-21-22-23-24-25-26-27>	ES	E7,E11	E7,E9,E11	-0.30175	0.786005	1.08775	0.000772118	0.0132618	0.459002	0.182794	-0.276208
uc008vvx.1,uc008vvy.1,uc008vvz.1,uc008vwa.1,uc008vwb.1,uc012dpq.1:chr4:-:148550429:148681807:KIF1B,Kif1b:<1-2-3-4-5-6-7-8-9-13-14-15:17	ES	E15,E17	E15,E16,E17	0.182322	1.47085	1.28853	0.000774006	0.0132618	0.293332	0.165977	-0.127354
uc009rvm.2,uc009rvn.2,uc009rvo.2:chr9:+:111020614:111128172:Lrrfip2:6-7-8-9-10:13-14-15-16-17-18>	ES	E10,E13	E10,E11,E12,E13	0.55702	1.45952	0.902503	0.000772317	0.0132618	0.259092	0.0906992	-0.168392
uc007ngw.2,uc007ngx.2:chr12:-:31578190:31596477:Acp1:<1-2:5-6-7>	ME	E2,E3,E5	E2,E4,E5	-0.0170858	0.834964	0.85205	0.000778782	0.0133092	0.493567	0.69388	0.200313
uc008lfq.1,uc008lfr.1,uc008lfs.1:chr2:+:93027740:93041914:Trp53i11:<1:3	ES	E1,E3	E1,E2,E3	0.46426	2.07598	1.61172	0.000780244	0.0133092	0.287752	0.101606	-0.186146
uc007yet.1,uc007yeu.1,uc007yev.1,uc007yew.1,uc007yex.1:chr16:-:11075003:11134625:Txndc11:<1-2-3-4:	ALE	E4,E6	E4,E7	1.23673	-1.09718	-2.33391	0.000784775	0.0133273	0.51317	0.0996123	-0.413557
uc007hca.2,uc007hcb.2,uc007hcc.2,uc007hcd.2,uc007hce.2,uc007hcf.1:chr10:-:115922216:116018567:Cnot2:3:5	ES	E3,E5	E3,E4,E5	-0.24163	0.520705	0.762335	0.000792287	0.0134252	0.42111	0.23161	-0.1895
uc009dis.2,uc009dit.2,uc012eqj.1:chr6:+:115311238:115440419:Pparg::4-5-6-7-9-10>	AFE	E1,E2,E4	E3,E4	0.37714	-0.673014	-1.05015	0.000795045	0.0134422	0.457723	0.203197	-0.254526
uc007bzp.2,uc007bzq.2,uc007bzr.2,uc007bzs.2,uc007bzt.2,uc007bzu.2,uc011wpe.1:chr1:+:92895303:93025521:Lrrfip1:17-18:22	ES	E18,E22	E18,E19,E20,E22	-0.707519	0.108461	0.81598	0.000800327	0.0135018	0.518223	0.335954	-0.182268
uc009pba.1,uc009pbb.1,uc009pbc.1:chr9:-:42771924:42913801:Arhgef12:5-6:	ALE	E6,E7	E6,E8,E9,E10,E11,E12,E13	-1.93088	-3.9472	-2.01632	0.000807291	0.0135597	0.0615557	0.00625573	-0.0552999
uc007rca.1,uc007rcb.1,uc007rcc.1:chr13:+:68721124:68731156:Fastkd3:3:5-6	A5SS	E3,E5	E3,E4,E5	-0.242332	-1.13706	-0.894728	0.000809646	0.0135695	0.300938	0.484509	0.183571
uc007vhd.1,uc007vhe.1,uc007vhf.1,uc007vhg.1:chr15:-:11769651:11837042:Npr3:2:4-6-7-8-9	ES	E2,E4	E2,E3	2.87277	0.293241	-2.57953	0.000811513	0.0135712	0.0206374	0.137798	0.117161
uc009tog.2,uc009toh.2,uc009toi.2,uc009toj.2,uc012hks.1:chrX:+:71528035:71535490:Taz:<1-2-3-4-5.6-7:9	A3SS	E7,E9	E7,E8,E9	2.12319	1.09806	-1.02513	0.000823717	0.0137453	0.0954029	0.24758	0.152177
uc008iux.1,uc008iuy.1,uc008iuz.1,uc008iva.1,uc008ivb.1,uc008ivc.1:chr2:-:26238319:26244836:Sdccag3:6:	ALE	E6,E7	E6,E9	0.346276	-1.17412	-1.5204	0.000835044	0.0139041	0.335059	0.0889928	-0.246066
uc007bho.1,uc007bhp.1,uc007bhq.1,uc007bhr.1,uc007bhs.1,uc007bht.1:chr1:+:65233256:65325270:Pikfyve:<30-31-32-33-34-35-36-37-38-39-40:42-43-44-45-46-47-48-49-50>	ES	E40,E42	E40,E41,E42	-2.01398	-0.515506	1.49848	0.000837537	0.0139099	0.824261	0.574548	-0.249713
uc009cor.1,uc009cos.1,uc009cot.1,uc009cou.1,uc009cov.1,uc009cow.1:chr6:+:83958583:84161036:Dysf:3-4-5-6:8-9-10-11-12-13-14-15-16-17-18	ES	E6,E8	E6,E7,E8	-3.61092	-1.47785	2.13307	0.000840564	0.0139099	0.972801	0.77332	-0.199481
uc009taa.2,uc009tab.1,uc009tac.2,uc012hgl.1:chrX:-:35884797:35929373:Cul4b::6-7-8-9-10-11-12-13-14-15-16-18-19-20-21-22-23-24-25-26>	AFE	E4,E6	E5,E6	-0.286957	0.988311	1.27527	0.000841643	0.0139099	0.349113	0.130674	-0.218439
uc009knj.2,uc009knk.2,uc009knl.2,uc009knm.2,uc009knn.2,uc009kno.2,uc009knp.2,uc009knq.2,uc009knr.2,uc009kns.2,uc009knt.2,uc009knu.2,uc009knv.2,uc009knw.2,uc009knx.2,uc012fxm.1:chr7:+:149684740:149701914:Tnnt3:<1-2-3:5	ES	E3,E5	E3,E4,E5	-0.177346	-0.818478	-0.641132	0.000853534	0.0140308	0.519652	0.683913	0.164261
uc009jxk.1,uc009jxl.1,uc009jxm.1:chr7:-:135076151:135090239:Prss36:<5-6-7:10	ES	E7,E10	E7,E8,E10	-1.29928	1.20397	2.50326	0.00085836	0.0140786	0.787537	0.116713	-0.670824
uc007eco.1,uc007ecp.1,uc007ecq.1,uc007ecr.1:chr1:+:193399612:193445570:Ints7:3-4-5-6-7-8-9-10-11:	ALE	E11,E12	E11,E13,E14,E15,E16,E17,E18,E19,E20,E21	-1.12873	-2.67313	-1.5444	0.000869874	0.0142067	0.247243	0.0590823	-0.188161
uc009lxr.2,uc012gep.1:chr8:+:72315061:72331647:Atp13a1:<1-2-3-4-5-6:8-10	IR	E6,E8	E6,E7,E8	1.25888	2.57976	1.32088	0.000869723	0.0142067	0.18781	0.0530147	-0.134796
uc008mqq.2,uc008mqr.2:chr2:-:144075858:144096638:Snx5::3-4-5-6-7-8-9-10-11-12-13-14-15>	AFE	E1,E3	E2,E3	-1.76924	0.190954	1.9602	0.000877861	0.0143067	0.895268	0.71909	-0.176178
uc007dnu.1,uc007dnv.2,uc011wwa.1,uc011wwb.1:chr1:-:173212083:173218092:Usp16,Usp21:4:7	IR	E4,E7	E4,E5,E6,E7	1.335	2.66549	1.33049	0.00088035	0.0143169	0.138167	0.0373292	-0.100837
uc008bbc.2,uc008bbd.2,uc008bbe.2,uc008bbf.2,uc008bbg.1:chr17:+:25716118:25799668:Lmf1:<1:6-7-10-12-13-14-15-16>	ES	E1,E6	E1,E2	-1.12947	-3.28856	-2.1591	0.000884005	0.0143459	0.6	0.958666	0.358666
uc007axm.1,uc007axn.1,uc007axo.1,uc007axp.1:chr1:-:51522850:51535263:Nabp1,Obfc2a:12:	ALE	E12,E13	E12,E14	0.0490416	-1.28728	-1.33632	0.000901029	0.0145606	0.605646	0.663672	0.0580257
uc008gqb.1,uc008gqc.1:chr19:-:10608354:10630728:Tmem216::3-4-5-6.7>	AFE	E1,E3	E2,E3	-1.88402	-0.101803	1.78222	0.000916053	0.0147451	0.943438	0.752602	-0.190837
uc008hfc.2,uc008hfe.2,uc008hff.2,uc008hfg.2,uc008hfh.1:chr19:-:32197216:32464204:Sgms1::11-15-16-17-18>	AFE	E10,E11	E2,E3,E5,E8,E9,E11	1.01402	-0.13382	-1.14784	0.000916284	0.0147451	0.122183	0.295345	0.173162
uc008nmo.1,uc008nmp.1,uc008nmq.1,uc008nmr.1,uc008nms.1,uc008nmt.1,uc008nmu.1,uc008nmv.1,uc008nmw.1,uc012chr.1:chr2:-:155972974:156005976:Caper,Rbm39::10-12-13-14-16-17-18-19-20	AFE	E8,E10	E9,E10	-0.058866	2.01495	2.07381	0.000922657	0.0148166	0.481868	0.0584418	-0.423427
uc008hpj.1,uc008hpk.1:chr19:-:44183126:44210366:Cwf19l1:<1-2:4-5-6-7-8-9-10-11-12-13-14-15>	A3SS	E2,E4	E2,E3,E4	-0.842685	-2.24453	-1.40184	0.000928146	0.0148619	0.69901	0.916666	0.217656
uc009dle.2,uc009dlf.2,uc009dlg.2,uc012eqx.1,uc012eqy.1,uc012eqz.1,uc012era.1:chr6:+:117850357:117875640:Hnrnpf:<2:7-8-9>	A5SS	E2,E7	E2,E3,E7	-1.16693	-0.0529908	1.11394	0.000929352	0.0148619	0.593709	0.306003	-0.287707
uc007zma.1,uc007zmb.1,uc007zmc.1,uc012agp.1:chr16:-:56015620:56029830:Pcnp::3	AFE	E1,E3	E2,E3	0.886699	2.43357	1.54688	0.000939916	0.0149417	0.280693	0.0702185	-0.210475
uc009ngz.2,uc012gka.1,uc012gkb.1:chr8:+:109580776:109584828:Nip7:<1-2:4-5-6>	IR	E2,E4	E2,E3,E4	1.41513	2.56055	1.14542	0.00094018	0.0149417	0.149478	0.0411328	-0.108345
uc007qeq.2,uc007qer.2,uc007qes.2:chr13:+:41096378:41108402:Pak1ip1::9-10-11-12-13>	AFE	E5,E7,E9	E8,E9	0.693875	2.18985	1.49597	0.000944361	0.0149771	0.805678	0.955748	0.15007
uc009tng.2,uc009tnh.2,uc009tni.2:chrX:-:71162208:71167283:Naa10:<1-2-3-4-5-7-9:11>	A3SS	E9,E10,E11	E9,E11	2.58169	1.73928	-0.842418	0.000959929	0.0151926	0.907557	0.804775	-0.102783
uc008hrm.1,uc008hrn.1,uc008hrp.1,uc008hrq.1:chr19:-:45824748:45858269:Mgea5:<2.3-4-5:7-8-9-10-11-12-13	IR	E5,E7	E5,E6,E7	0.263164	1.99864	1.73547	0.00096601	0.0152574	0.108569	0.0139941	-0.0945751
uc008gik.2,uc008gil.2,uc008gim.2:chr19:+:6363689:6378038:Sf1:12-13:15>	A3SS	E13,E15	E13,E14,E15	-1.09419	-0.296819	0.797369	0.000972345	0.0153208	0.479918	0.298002	-0.181916
uc009kwd.1,uc009kwe.1,uc012fzo.1,uc012fzp.1:chr8:-:12614276:12672100:Tubgcp3,mKIAA0357:12-13-14-15:17-18-19-20-21-22-23-24>	IR	E15,E17	E15,E16,E17	-0.304939	0.951699	1.25664	0.000974016	0.0153208	0.174957	0.0505009	-0.124456
uc007awb.1,uc007awc.1,uc011wkc.1:chr1:-:44163390:44175618:Kdelc1:<1-2-3-4-5:7-9-10-11-12>	IR	E5,E7	E5,E6,E7	-0.0581537	0.952815	1.01097	0.0009767	0.0153316	0.441544	0.1933	-0.248244
uc008spm.1,uc008spn.1,uc008spo.1:chr4:+:43394853:43439960:Rusc2:<1-3-4-5-6-7-8-9-10-11-12:14>	IR	E12,E14	E12,E13,E14	-0.757785	0.730503	1.48829	0.000978701	0.0153317	0.683476	0.358603	-0.324873
uc007iyr.2,uc007iys.2,uc007iyt.2:chr11:-:54792463:54846973:Anxa6:<1-2-3-4-5-6-7-8-9-10-11-12-13-14-15-16-17-18-19-20:23-24-25-26-27>	ES	E20,E23	E20,E22,E23	-0.837692	-1.32416	-0.48647	0.000989185	0.0154643	0.686951	0.780001	0.0930505
uc008psg.1,uc008psh.1,uc008psi.1,uc008psj.1:chr3:+:87329499:87344078:Etv3:3:5	IR	E3,E5	E3,E4	-2.03688	0.262364	2.29925	0.000997513	0.0155628	0.883235	0.495472	-0.387762
uc007eeu.1,uc007eev.1,uc007eew.1,uc007eex.1:chr1:-:196923575:196957764:Cr1l,Crry:4-5-7-8-9-10-11:14>	ES	E11,E14	E12,E14	1.32377	3.3673	2.04352	0.00100471	0.0156433	0.166767	0.027363	-0.139404
uc007ygk.1:chr16:+:13819369:13835543:Ntan1:<1:4-5	ES	E1,E4	E1,E3	-1.17855	-2.30185	-1.1233	0.00102543	0.0159014	0.714534	0.894949	0.180415
uc008izt.1,uc008izu.1,uc008izv.1,uc008izw.1,uc008izx.1:chr2:+:29475239:29595883:Rapgef1:14:16-17-18-19-20-21-22-23-24-25-26-27-28>	ES	E14,E16	E14,E15,E16	-0.0953102	1.56862	1.66393	0.00102448	0.0159014	0.460019	0.133403	-0.326616
uc009ign.1,uc009igo.1:chr7:-:97273347:97278444:AK019082,BC048663:<1:4	ES	E1,E4	E1,E3,E4	2.83321	0.188052	-2.64516	0.00103057	0.0159488	0.0973085	0.399084	0.301775
uc008cds.1,uc008cdt.1,uc008cdu.1,uc012aqp.1:chr17:-:34976170:34987149:Skiv2l:10-11:13-14	IR	E11,E13	E11,E12,E13	-0.23301	0.614516	0.847526	0.00103538	0.015959	0.38456	0.185746	-0.198814
uc008ptz.1,uc008pua.1,uc008pub.1,uc008puc.1:chr3:+:87946316:87973562:Mef2d:<1-2-3:6-7-8	ME	E3,E4,E6	E3,E5,E6	0.743337	1.7836	1.04026	0.00103538	0.015959	0.696128	0.898979	0.20285
uc009bue.1,uc009buf.1,uc009bug.1,uc009buh.1,uc009bui.1,uc009buj.1,uc012eld.1:chr6:-:48377690:48395824:Zfp467:<1:5-6	ES	E1,E5	E1,E3	-0.372679	-1.61246	-1.23979	0.00104037	0.0159768	0.535699	0.656975	0.121276
uc009pxj.1,uc009pxk.1,uc009pxl.1,uc009pxm.1,uc009pxn.1:chr9:-:58722486:58884248:Neo1:9-10-11-12-13-14-15-16-18:20-21-22-23-25-26-27-28	A3SS	E18,E20	E18,E19,E20	1.33238	2.51723	1.18486	0.0010407	0.0159768	0.25117	0.0651382	-0.186032
uc007mrq.1,uc007mrr.1,uc007mrs.1,uc007mrt.1:chr11:-:119951835:119960045:2410002I01Rik:<1-2:4-5-7.8-9-10-11-12-13-14-15-16>	IR	E2,E4	E2,E3,E4	-1.53176	-0.44154	1.09022	0.00104735	0.0160149	0.65269	0.32216	-0.33053
uc009oki.2,uc009okj.2,uc009okk.1,uc009okl.2,uc009okm.2:chr9:+:20970157:21017692:Pde4a:4:6-8-10-11-13-14-15-16-17-18-19-20-21>	IR	E4,E6	E4,E5,E6	0.474842	1.35174	0.876899	0.00107085	0.0163121	0.120035	0.0450426	-0.0749921
uc009ina.1,uc012fqd.1:chr7:+:107621499:107634941:Ucp3:<1-2-3:5-6-7-8>	IR	E3,E5	E3,E4,E5	-0.295697	0.809473	1.10517	0.0010783	0.0163902	0.454243	0.188936	-0.265308
uc009kln.1,uc009klo.1:chr7:+:148661138:148679321:Tspan4::3-4-5-6-7-8-9>	AFE	E1,E3	E2,E3	0.863592	0.0245709	-0.839021	0.00109455	0.0166042	0.570317	0.830318	0.260001
uc008ijc.1,uc008ijd.1,uc008ije.1,uc008ijf.1,uc012bqu.1:chr2:-:11664199:11699176:Fbxo18:9-10-11-12-13-14-15-16-17-18-19-20-21-22-23:25-27-28-30>	IR	E23,E25	E23,E24,E25	0.576602	1.58168	1.00508	0.00111071	0.0168161	0.173905	0.069166	-0.104739
uc009olj.1,uc009olk.1,uc009oll.1,uc009olm.1,uc009oln.1:chr9:+:21229388:21312198:Dnm2:13-14-15:17-18-19-20-21-22	ES	E15,E17	E15,E16,E17	-0.382983	0.18144	0.564423	0.00111307	0.0168188	0.600387	0.44337	-0.157017
uc008svy.2,uc008svz.2,uc008swa.2,uc008swb.2,uc012dec.1:chr4:+:49644931:49669758:Rnf20:<1:3-4-5-6-7	IR	E1,E3	E1,E2,E3	0.0614859	-1.55679	-1.61827	0.00112843	0.0169508	0.390618	0.813538	0.42292
uc009ous.1,uc009out.1,uc009ouu.1,uc009ouv.1,uc012gqy.1:chr9:+:37209630:37221607:Robo4:<1-2-3-4-5-7-8-9:11-12-13-14-15	IR	E9,E10,E11	E9,E11	0.49513	-0.439588	-0.934719	0.00112632	0.0169508	0.486547	0.26181	-0.224737
uc009rng.2,uc009rnh.2:chr9:+:107790459:107805470:Mon1a:6:8>	IR	E6,E8	E6,E7,E8	1.90954	3.4012	1.49165	0.00112636	0.0169508	0.0933429	0.0228312	-0.0705116
uc009oof.2,uc009oog.2:chr9:+:22030146:22047798:Zfp809:<1-2-3-4-5:	ALE	E5,E6	E5,E7	1.02779	3.03145	2.00366	0.00113385	0.0169988	0.674841	0.921616	0.246774
uc007yzr.1,uc007yzs.1,uc012aet.1,uc012aeu.1:chr16:+:32914185:33016115:Lrch3:13-15-16-17:19-20-21-22>	ES	E17,E19	E17,E18,E19	-0.494624	-1.73192	-1.2373	0.00113753	0.0170208	0.546899	0.780446	0.233548
uc012aee.1,uc012aef.1:chr16:-:30312509:30388616:Atp13a3:<1-2-3-4-5-6-7-8-9-10-11-12-13-14-15-16-17-18-19-20-21-22-23-24-25-26-27-28-29-30-31-32:34>	ES	E32,E34	E32,E33,E34	-1.15744	-0.318453	0.838988	0.00114712	0.017131	0.713899	0.500524	-0.213375
uc007wtd.2,uc007wte.2,uc007wtf.2,uc007wtg.2:chr15:-:79116657:79158801:Pla2g6:5-6-7-8-9-10-11:13-14-15-16-17-18-19-20>	ES	E11,E13	E11,E12,E13	0.944462	2.19722	1.25276	0.00115535	0.0171869	0.195784	0.0811027	-0.114681
uc008iwn.1:chr2:-:26809082:26819906:Rexo4:<1-2-3:5-6-7-8>	ES	E3,E5	E3,E4,E5	-1.29244	-2.42008	-1.12764	0.00115439	0.0171869	0.695101	0.880136	0.185035
uc007wkv.2,uc007wkw.2,uc011zuw.1:chr15:+:76406788:76426241:Adck5:<1-2-3-4:6-7-8-9-11	A3SS	E4,E6	E4,E5,E6	0.274437	-1.23676	-1.5112	0.00115994	0.0172219	0.434466	0.787766	0.3533
uc009grt.2,uc009gru.1:chr7:+:52151448:52155994:Fuz:12:14	IR	E12,E14	E12,E13,E14	1.3618	0.592355	-0.769449	0.00116652	0.0172862	0.164958	0.305184	0.140225
uc009bfz.1,uc009bga.1,uc012ejs.1:chr6:+:31170430:31287394:AK008857,BC021953,BC099512:4:6	ES	E4,E6	E4,E5	-1.56257	-0.659814	0.902757	0.00116943	0.0172959	0.803355	0.612321	-0.191034
uc007wvt.1,uc007wvu.2,uc007wvv.2,uc007wvw.1,uc007wvx.1,uc007wvy.1,uc011zwi.1:chr15:+:80541742:80771516:Tnrc6b::6-7-8-9	AFE	E3,E4,E6	E5,E6	1.09876	-1.08178	-2.18054	0.00118245	0.0174088	0.729233	0.298641	-0.430592
uc008ruf.2,uc008rug.2,uc008rui.2,uc012czq.1,uc012czr.1,uc012czs.1,uc012czt.1:chr3:-:153570252:153575957:Rabggtb:10-11:13-14-15>	A3SS	E11,E13	E11,E12,E13	-1.59296	-2.34898	-0.756023	0.00118614	0.0174088	0.823377	0.910881	0.0875035
uc009lkh.2,uc009lki.2,uc012gcg.1:chr8:+:34842385:34887645:Gtf2e2::4-5-6-7-8-9-10>	AFE	E1,E4	E2,E4	1.37732	-0.194151	-1.57147	0.001183	0.0174088	0.209097	0.589616	0.38052
uc009lra.1,uc009lrb.1,uc009lrc.1,uc012gdn.1:chr8:-:48575481:48618824:D030016E14Rik::18-19-20-22-23-24-25-27-28-29-30-31-32-33-34-35>	AFE	E1,E2,E3,E4,E5,E6,E8,E9,E10,E11,E12,E13,E14,E16,E18	E17,E18	1.55019	2.90149	1.3513	0.00118593	0.0174088	0.508637	0.814345	0.305708
uc008nya.1,uc008nyb.1,uc008nyc.1,uc008nyd.1,uc008nye.1,uc008nyf.1,uc008nyg.1,uc008nyh.1:chr2:-:165609653:165722450:Zmynd8,mKIAA1125:24-25-26-27:29-30-31-32-33-34	A5SS	E27,E29	E27,E28,E29	-0.0037333	0.848611	0.852344	0.001197	0.0175012	0.390053	0.204261	-0.185792
uc009fjw.1,uc009fjx.1:chr7:-:19476232:19495753:Ccdc61:<1-2-3-4:6-7-8	A3SS	E4,E6	E4,E5,E6	-1.79295	-20	-18.207	0.00119535	0.0175012	0.81923	1	0.18077
uc008dcj.2,uc008dck.2,uc012avv.1:chr17:+:56724404:56745717:Safb:<1-2-3-4-5-8:10	IR	E8,E10	E8,E9,E10	1.39233	2.5436	1.15128	0.00123058	0.0179581	0.0673245	0.015787	-0.0515376
uc008ede.1,uc008edf.1,uc008edg.1,uc008edh.1,uc008edi.1:chr18:-:14784137:14841423:Ss18:7:10-11-12>	ES	E7,E10	E7,E9,E10	0.594348	1.56381	0.969461	0.00123795	0.0180314	0.270955	0.114533	-0.156422
uc007fyv.1,uc007fyw.1,uc007fyx.1,uc007fyy.1:chr10:-:79002989:79017836:Mier2:<1-2:4-5-6.7-8-9-10-11-12-13-14	A3SS	E2,E4	E2,E3,E4	0.666047	-0.551807	-1.21785	0.00124927	0.0180591	0.257156	0.516035	0.258879
uc008jdh.1,uc008jdi.2,uc008jdj.2,uc008jdk.2,uc008jdl.1,uc008jdm.2:chr2:-:30881725:30997528:Fnbp1:13:15-16-17	ES	E13,E15	E13,E14	0.988215	-0.378282	-1.3665	0.00124231	0.0180591	0.230533	0.580206	0.349673
uc008vtg.1,uc008vth.1,uc008vti.1,uc008vtj.1:chr4:-:147247703:147278928:Mfn2::3	AFE	E1,E3	E2,E3	1.52618	2.79469	1.26851	0.00124794	0.0180591	0.158098	0.0399379	-0.11816
uc009upy.1,uc009upz.1,uc009uqa.1,uc009uqb.1:chrX:+:148578810:148659779:Iqsec2:<3:5>	ES	E3,E5	E3,E4,E5	-1.2371	-2.27309	-1.03599	0.00126202	0.0182091	0.708879	0.871897	0.163018
uc007haa.2,uc007hab.2,uc007hac.2,uc007had.2,uc007hae.2:chr10:+:110910247:110935206:Nap1l1:17-18:20.21>	IR	E18,E20	E18,E19,E20	-1.49939	-3.7363	-2.23692	0.00126794	0.0182603	0.627091	0.961995	0.334904
uc007jcw.1,uc007jcx.1:chr11:-:58779249:58791552:AK009977,BC030470:<1:	ALE	E1,E2	E1,E3	2.21557	-0.546544	-2.76212	0.001282	0.0184187	0.94645	0.40487	-0.54158
uc009dso.2,uc009dsp.2,uc009dsq.2:chr6:+:124881405:124887256:Mlf2:<1-2-4-5-6-7-9-11:14>	IR	E11,E14	E11,E12,E13,E14	0.865377	1.73177	0.866396	0.00128374	0.0184187	0.188346	0.0784243	-0.109921
uc007dxf.2,uc007dxg.2:chr1:-:183103356:183142109:Wdr26:<1-2-3:5-6-7-8-9-10-11-12-13-14-15>	A5SS	E3,E5	E3,E4,E5	0.168509	0.718566	0.550058	0.00129974	0.018498	0.422062	0.28658	-0.135482
uc007gyv.2,uc007gyw.2,uc011xna.1:chr10:-:106373219:106560720:Acss3:<1-3-4-5-6-7-8-9-10-11:	ALE	E11,E12	E11,E13,E14,E15,E16,E17,E18	-1.82603	-3.31941	-1.49338	0.00129924	0.018498	0.112709	0.0198966	-0.0928121
uc007hlf.1,uc007hlg.1,uc007hlh.1,uc007hli.1,uc007hlj.1,uc007hlk.1,uc007hll.1,uc011xpz.1:chr10:+:127528665:127566359:Baz2a,TIP5:<1:3	ES	E1,E3	E2,E3	1.25276	-0.693147	-1.94591	0.0012934	0.018498	0.0877961	0.437741	0.349945
uc008dxk.2,uc008dxl.2,uc008dxm.2,uc008dxn.2,uc008dxo.2,uc008dxp.2,uc008dxq.2,uc008dxr.2,uc008dxs.2,uc008dxt.2,uc008dxu.2,uc008dxv.2,uc008dxw.2,uc008dxx.2,uc012ayt.1,uc012ayu.1,uc012ayv.1,uc012ayw.1:chr18:-:3266351:3337587:Crem:15:17>	A3SS	E15,E17	E15,E16,E17	-1.88303	-3.2788	-1.39577	0.00130665	0.0185394	0.735517	0.911862	0.176345
uc007lpl.1,uc007lpm.1,uc007lpn.1:chr11:+:101443555:101453099:Tmem106a:<1.2:4.5-6-7-8-9-10-11-12>	IR	E2,E4	E2,E3,E4	-0.0733438	-0.968359	-0.895016	0.00130972	0.0185487	0.352437	0.539865	0.187428
uc007gwa.1,uc007gwb.1,uc007gwc.1,uc007gwd.1:chr10:-:94637379:94786767:Cradd::6-8>	AFE	E1,E2,E3,E6	E4,E6	0.493924	-1.28905	-1.78297	0.0013444	0.0189434	0.725961	0.289693	-0.436268
uc008jqu.1,uc008jqv.1,uc008jqw.1:chr2:-:51992166:52194318:Neb:142-143:145-146	ES	E143,E145	E143,E144,E145	-0.939888	-1.85946	-0.919568	0.00134166	0.0189434	0.651571	0.834626	0.183055
uc008uaq.1,uc008uar.1,uc012did.1:chr4:-:107687397:107704695:Podn:5-6-7-8:10-11-12-13-14-15>	IR	E8,E10	E8,E9,E10	0.568724	1.76846	1.19974	0.00134499	0.0189434	0.147957	0.0407673	-0.107189
uc007mcq.1,uc007mcr.1,uc007mcs.1:chr11:-:109434834:109472703:Wipi1:<1-2-3-4-5-6-7-8-10-11-12-13:	ALE	E13,E14	E13,E15	-2.70298	-1.1536	1.54938	0.00135215	0.0189746	0.0272298	0.14258	0.11535
uc008hpg.2,uc008hph.2,uc008hpi.2:chr19:-:44147823:44181967:Chuk:14-15-16:	ALE	E16,E17	E16,E18,E19,E20	-1.56136	-3.13923	-1.57787	0.00135058	0.0189746	0.247789	0.0381357	-0.209653
uc008cit.2,uc008ciu.2,uc008civ.2,uc012ars.1:chr17:+:36002539:36012541:2310014H01Rik:4-5:7>	IR	E5,E7	E5,E6,E7	0.672273	2.90069	2.22842	0.00136458	0.01901	0.14299	0.0261212	-0.116869
uc008ica.2,uc008icb.2,uc012boh.1:chr19:+:60887472:60912132:Fam45a:3:5-6-7-8.9-10-11>	ES	E3,E5	E3,E4,E5	-1.34709	-3.14383	-1.79674	0.00136378	0.01901	0.732037	0.960461	0.228424
uc008qkq.2,uc008qkr.2,uc008qks.2,uc008qkt.2,uc008qku.2,uc008qkv.2,uc008qkw.2,uc012ctv.1:chr3:-:95543896:95558900:Tars2:<1-2-3-4-5.6:8-9	IR	E6,E8	E6,E7,E8	1.40464	2.5539	1.14926	0.00136271	0.01901	0.163088	0.0499224	-0.113166
uc007dzt.2,uc007dzv.1,uc007dzw.2:chr1:-:188872285:189039325:Spata17:4-5-7:11-12>	ES	E7,E10,E11	E7,E11	3.85015	1.44036	-2.40979	0.0013796	0.0190922	0.970208	0.68967	-0.280538
uc008etw.1,uc008etx.1,uc008ety.1,uc008etz.1:chr18:+:42671140:42735439:Tcerg1:7-8-9-10-11-12-14-15-16-17-18-19-20-21-22:24>	ES	E22,E24	E22,E23,E24	0.137279	1.30266	1.16538	0.00138043	0.0190922	0.38834	0.157028	-0.231311
uc008pvj.2,uc008pvk.2,uc008pvl.2:chr3:-:88285070:88307254:Lmna:<1-3-4-5-6-7-8-9-10-11:	ALE	E11,E12	E11,E13,E14	-0.42591	-1.37228	-0.946375	0.00137994	0.0190922	0.875164	0.681616	-0.193548
uc008cxu.1,uc008cxv.1,uc008cxw.1:chr17:+:48549338:48556591:AI314976:4:6	A5SS	E4,E6	E5,E6	-2.61848	-1.34873	1.26975	0.00139197	0.0192172	0.909196	0.67125	-0.237946
uc007mkj.1,uc007mkk.1,uc007mkl.1,uc007mkm.1:chr11:-:116033201:116060359:Acox1:<1-2:4	ES	E2,E4	E3,E4	1.53899	2.79713	1.25814	0.00140918	0.0193851	0.108468	0.0231443	-0.085324
uc008jhv.1,uc008jhw.1,uc008jhx.1,uc012bue.1:chr2:-:33305807:33324052:Zbtb43:4:6>	ES	E4,E6	E4,E5,E6	0.805625	-0.362905	-1.16853	0.00143799	0.0197107	0.254096	0.496205	0.24211
uc008inr.1,uc008ins.1,uc008int.1,uc008inu.1,uc008inv.1,uc008inw.1:chr2:-:22795508:22895760:Abi1:<1-2-3:5-6-7	ES	E3,E5	E3,E4,E5	-0.88961	-0.0590595	0.830551	0.00144544	0.0197423	0.689143	0.496496	-0.192647
uc008pfk.1,uc008pfl.1,uc008pfm.1,uc008pfn.1,uc008pfo.1,uc008pfp.1:chr3:+:54496779:54532685:D3Ertd300e,Fam48a:8-9-10-11-12-13-14-15-16-18-19-20-21-22:24	A3SS	E22,E24	E22,E23,E24	-1.84741	-0.805219	1.04219	0.00144519	0.0197423	0.688576	0.362935	-0.325641
uc008jem.2,uc008jen.2,uc008jeo.2:chr2:+:32006667:32090057:Prrc2b:<1-2-3-4-5-6-7-8-9-10-11-12-13-14-15:17-18-19-20	ES	E15,E17	E15,E16,E17	-1.54756	-0.483427	1.06414	0.00146375	0.019957	0.345243	0.152698	-0.192544
uc008kel.2,uc008kem.2,uc008ken.2,uc008keo.2,uc008kep.2:chr2:+:75497315:75507464:Hnrnpa3:<1:3.4-5-6-7-8-9-10-11-12	A5SS	E1,E3	E1,E2,E3	0.398877	1.17192	0.773039	0.001472	0.0200338	0.34762	0.205317	-0.142303
uc008ssm.1,uc008ssn.1,uc008sso.1,uc008ssp.1:chr4:+:45354972:45392594:Dcaf10,Wdr32:<1-2:6-7-8-9-10>	ES	E2,E6	E2,E4,E6	0.487873	1.89264	1.40477	0.00149854	0.0203589	0.343649	0.103181	-0.240468
uc009ign.1,uc009igo.1:chr7:-:97273347:97278444:AK019082,BC048663:<1:5>	ES	E1,E5	E1,E4	1.60142	0.336119	-1.2653	0.00150203	0.0203702	0.111175	0.331482	0.220308
uc007gxp.1,uc007gxq.1,uc007gxr.1,uc007gxs.1,uc011xmk.1:chr10:+:99478457:99563046:Kitl,Kitlg:<2-4-5-6-8:10-11-12-14>	ES	E8,E10	E8,E9,E10	0.0638798	-0.957415	-1.02129	0.00151776	0.0205473	0.450494	0.664843	0.214349
uc009tia.1,uc009tib.1,uc009tic.1,uc012hia.1,uc012hib.1:chrX:-:57476466:57657156:Atp11c:<1-2-3-4-5-6-7-8-10-11-12-13-14-15-16-17-18-19-20-21-22-23.24-25-26-27-28-29-30:33>	ES	E30,E33	E30,E32,E33	0.068487	-1.24227	-1.31076	0.00153615	0.0207596	0.419386	0.766485	0.347099
uc009myk.2,uc009myl.2,uc009mym.2:chr8:-:97969995:98012720:Csnk2a2:6-7-8-9-10-11-12:	ALE	E12,E13	E12,E14	-0.093536	0.532387	0.625923	0.00156072	0.0210546	0.45003	0.605495	0.155465
uc007joc.2,uc007jod.2,uc007joe.2,uc007jof.1:chr11:-:68634948:68685357:Ndel1::3-4-5-6-7-8-9	AFE	E1,E3	E2,E3	-2.9314	-1.38401	1.54739	0.00157528	0.0212138	0.888154	0.623607	-0.264547
uc007udr.1,uc007uds.1,uc007udt.1,uc007udu.1:chr14:-:58451538:58509099:Zdhhc20:<1-2-3-4-6-7-8-10-11-12-13:15>	ES	E13,E15	E13,E14,E15	0.510826	-0.916291	-1.42712	0.00158483	0.0213051	0.323659	0.594794	0.271135
uc008sry.2,uc008srz.2,uc008ssa.2,uc012ddi.1:chr4:+:44769430:44945086:Zcchc7::11-12-13>	AFE	E10,E11	E4,E5,E6,E7,E8,E11	0.558561	-0.297485	-0.856047	0.00159544	0.0214101	0.464532	0.720768	0.256235
uc008pzo.1,uc008pzp.1,uc008pzq.1:chr3:+:89234182:89239050:Pygo2::4-5>	AFE	E1,E4	E3,E4	-0.0785746	1.98977	2.06834	0.00163563	0.0218729	0.8407	0.429648	-0.411052
uc009kfm.1,uc009kfn.2:chr7:+:146398886:146428872:Lrrc27:<3-4-5-6-7-8-9.10:	ALE	E10,E11	E10,E12,E13,E14,E15	-3.13388	-20	-16.8661	0.00164525	0.0219252	0.0855186	0	-0.0855186
uc009rey.1,uc009rez.1,uc009rfa.1,uc009rfb.1,uc012gzf.1:chr9:+:100544041:100858963:Stag1:<1-2-3-4-6-7-8-9-10-11-12-13-15-16-17-18-19-20-21-22-23-24-25-26-27-28-29-30-31-32:35-36-37>	ES	E32,E35	E32,E33,E34,E35	-2.97617	-1.82426	1.15192	0.00164455	0.0219252	0.93237	0.820348	-0.112022
uc007jcy.1,uc007jcz.1,uc007jda.1,uc011xvj.1:chr11:+:58791617:58804960:Trim11:7:9>	IR	E7,E9	E7,E8,E9	-1.03806	-0.078084	0.959978	0.00166704	0.0221771	0.337664	0.182941	-0.154723
uc008htw.2,uc008htx.2,uc008hty.2,uc008htz.2:chr19:+:46673595:46731879:D19Wsu162e,Opal1:<1:4	ES	E1,E4	E1,E2,E4	-0.481146	-1.20105	-0.719901	0.00168766	0.0221921	0.622405	0.733913	0.111508
uc008iir.1,uc008iis.1,uc008iit.1,uc008iiu.1,uc008iiv.1,uc008iiw.1,uc008iix.1,uc008iiy.1,uc008iiz.1,uc008ija.1,uc008ijb.1,uc012bqt.1:chr2:+:11627162:11655589:IL15ra,Il15ra:6:11	ES	E6,E11	E6,E9	-1.47242	-2.13187	-0.659447	0.00167481	0.0221921	0.724681	0.821465	0.0967842
uc008qin.1,uc008qio.1,uc008qip.1,uc008qiq.1,uc008qir.1:chr3:-:94985689:95021864:Gabpb2:4-5:7-9-10-11-12>	IR	E5,E7	E5,E6,E7	0.17512	1.22803	1.05291	0.00168151	0.0221921	0.208002	0.0729905	-0.135012
uc008yio.1:chr5:+:102194148:102252871:Cds1:<1-2-3-4-5-6:9	ES	E6,E9	E6,E8,E9	-0.240681	0.855319	1.096	0.00168791	0.0221921	0.493761	0.227676	-0.266086
uc009amt.1,uc012egv.1:chr5:+:146044211:146052338:Zfp498:<2:4-5-6-7>	A5SS	E2,E4	E2,E3,E4	0.149532	1.8718	1.72227	0.00167455	0.0221921	0.459082	0.091261	-0.367821
uc009fcp.1,uc009fcq.1,uc009fcr.1,uc009fcs.1:chr7:-:7235026:7252222:Clcn4-2:13:15-16-17-18>	IR	E13,E15	E13,E14,E15	-0.572029	0.711138	1.28317	0.0016884	0.0221921	0.332396	0.104444	-0.227952
uc007jud.2,uc007jue.2,uc007juf.2,uc007jug.2,uc007juh.2,uc007jui.2,uc011xxr.1,uc011xxs.1:chr11:-:70048705:70053354:0610010K14Rik,Rnasek:4-5-6:8	ES	E6,E8	E6,E7,E8	-1.95205	-1.01005	0.941994	0.00169785	0.0222781	0.841757	0.66722	-0.174537
uc009adz.2:chr5:+:138229029:138263849:Zcwpw1:<1-2-3-4-5-6-7-8-9-10-11:13-14-15-16-17>	ES	E11,E13	E11,E12,E13	-1.75786	-0.575364	1.18249	0.00171278	0.0223974	0.808844	0.601945	-0.206898
uc009ros.2,uc009rot.2,uc009rou.2:chr9:-:107987744:107996811:Apeh:<1-2-3-4-5-6:8-9-10-11-12-13-14-15-16-17-18.19-20-21-22-23-24>	IR	E6,E8	E6,E7,E8	2.19365	3.70733	1.51368	0.00171831	0.0224315	0.0722952	0.0153585	-0.0569367
uc008ayt.2,uc008ayu.1,uc008ayw.2,uc008ayx.2,uc008aza.2,uc008azb.2,uc008azc.2,uc008azd.2,uc008aze.2,uc008azf.2,uc008azg.1,uc008azh.2,uc012amv.1:chr17:-:25025430:25073922:Eme2,Jsap1,Mapk8ip3:9:11-12-13-14-16-17-18	A5SS	E9,E10	E9,E11	2.49319	0.872123	-1.62106	0.00172168	0.0224374	0.639557	0.188701	-0.450856
uc009pxz.1,uc009pya.1,uc009pyb.1,uc009pyc.1,uc009pyd.1,uc009pye.1:chr9:+:59465090:59498076:Parp6:3-4-5-6-7:11-12	ES	E7,E11	E7,E9,E11	-3.35394	-1.88673	1.46721	0.00173709	0.0225999	0.971143	0.852665	-0.118478
uc008gjv.2,uc008gjw.2:chr19:-:7056961:7062141:Vegfb:<1-2-3-4-5:7-8>	A3SS	E5,E7	E5,E6,E7	0.431092	-0.2418	-0.672892	0.00174109	0.0226136	0.309806	0.486259	0.176453
uc008zwz.1,uc008zxa.1,uc008zxb.1,uc008zxc.1:chr5:+:135408242:135418507:Wbscr27:3-4-5:7>	ES	E5,E7	E5,E6,E7	-20	-2.1036	17.8964	0.00174569	0.02262	1	0.852087	-0.147913
uc009taw.1,uc009tax.1,uc009tay.1,uc009taz.1:chrX:+:39502588:39630352:SAP2,Stag2::5-6-7-9-10-11-12-13-14-15-16-17-18-19-20-21-22-23-24-25-26-27-28-29-30-31-32-33-34-35-36-37>	AFE	E1,E2,E5	E4,E5	0.52281	-0.95243	-1.47524	0.00174748	0.02262	0.451621	0.176836	-0.274784
uc009tjz.2,uc009tka.2:chrX:-:68673234:68746024:Cd99l2:<1-2:4-5-6-7-8-9-10>	ES	E2,E4	E2,E3,E4	-0.772603	-0.00483137	0.767771	0.00175956	0.022738	0.631898	0.425817	-0.206081
uc007pdk.2,uc007pdl.2,uc007pdm.2:chr12:+:112812720:112894438:Mark3:16:18>	ES	E16,E18	E16,E17,E18	-3.27289	-1.84131	1.43158	0.0017742	0.0228887	0.963374	0.837933	-0.125441
uc007jqv.1,uc007jqw.1:chr11:-:69470205:69476144:Mpdu1,Supl15h:<1-2-3:5	A3SS	E3,E5	E3,E4,E5	1.64631	0.895024	-0.751287	0.00178124	0.0229409	0.128576	0.246761	0.118186
uc009gtn.2,uc009gto.2,uc009gtp.1,uc009gtq.1:chr7:-:52386558:52391802:Flt3l::3	AFE	E1,E3	E2,E3	-0.289461	-2.19551	-1.90605	0.00179975	0.0231036	0.274508	0.772768	0.49826
uc009smm.1,uc009smn.1,uc009smo.1,uc009smp.1,uc009smq.1,uc009smr.1,uc012hel.1:chrX:+:7367120:7397689:Gripap1:7-8:10-11-12-13	ES	E8,E10	E8,E9,E10	-2.66953	-1.15638	1.51315	0.00179989	0.0231036	0.922763	0.737301	-0.185461
uc007ihc.1,uc007ihd.1,uc007ihe.1,uc007ihf.1,uc011xsq.1:chr11:+:29426435:29445255:Mtif2:4:6	A5SS	E4,E6	E4,E5,E6	-1.44561	-3.2924	-1.84679	0.00180499	0.0231303	0.66215	0.961287	0.299137
uc008svy.2,uc008svz.2,uc008swa.2,uc008swb.2,uc012dec.1:chr4:+:49644931:49669758:Rnf20:3-4-5-6-7:	ALE	E7,E8	E7,E9,E11,E12,E13,E14,E15,E16,E17,E18,E19,E20,E21,E22,E23,E24	-2.31735	-4.40388	-2.08654	0.00181458	0.0232125	0.176138	0.0145216	-0.161616
uc007ebj.2,uc007ebk.2,uc007ebl.2,uc007ebm.2,uc007ebn.2,uc007ebo.2,uc007ebp.1,uc007ebq.2:chr1:+:192748986:192770370:Angel2:<6:8	A5SS	E6,E8	E6,E7,E8	0.870354	-0.0579873	-0.928341	0.00182236	0.0232366	0.272072	0.363991	0.0919189
uc007ofy.1,uc007oga.2,uc007ogb.2,uc011ypf.1:chr12:-:86259098:86311836:1110018G07Rik,mKIAA0317:<1-2-4-5-6-7-8-9-10-11-12-13-14-15-16-17-18:	ALE	E18,E19	E18,E20,E21,E22	-2.65425	-4.80429	-2.15004	0.00183831	0.0234011	0.146562	0.00978209	-0.13678
uc008ryf.2,uc008ryg.2,uc008ryh.1,uc008ryi.2,uc008ryj.2,uc008ryk.2,uc008ryl.2,uc008rym.1,uc008ryn.2,uc008ryo.2,uc008ryp.1,uc012dak.1:chr4:-:9376231:9596491:Asph:5-7:	ALE	E7,E10,E11	E7,E12	2.39699	0.887128	-1.50986	0.0018545	0.0235681	0.456868	0.149425	-0.307443
uc007wmz.2,uc007wna.2,uc007wnb.2:chr15:+:76875504:76887538:Apol6::3-4-5.6	AFE	E1,E3	E2,E3	1.63546	0.775545	-0.859913	0.00187475	0.0237468	0.242666	0.417915	0.175249
uc007wnc.2,uc007wnd.2,uc007wne.2,uc007wnf.2,uc007wng.2,uc007wnh.2,uc007wni.2,uc011zvf.1,uc011zvg.1:chr15:-:76909419:77137483:Rbfox2,Rbm9:14:16-17-18.19.20>	ES	E14,E16	E14,E15	0.674924	2.39254	1.71762	0.00187373	0.0237468	0.305044	0.0445678	-0.260476
uc009nus.2,uc009nut.2,uc009nuu.2,uc009nuv.2,uc009nuw.2,uc009nux.2,uc009nuy.1,uc009nuz.2:chr8:-:125766255:125778075:1300018I17Rik:12:14-15-16-17	A3SS	E12,E14	E12,E13,E14	0.570438	1.54523	0.974796	0.00188007	0.023775	0.312752	0.134123	-0.178629
uc007bgu.1,uc007bgv.1:chr1:-:64653053:64663780:Fam119a::4-5-6>	AFE	E1,E2,E4	E3,E4	-0.099664	1.76804	1.8677	0.00189048	0.0238673	0.936931	0.989447	0.0525159
uc008oob.2,uc008ooc.2,uc008ood.2,uc012cmy.1,uc012cmz.1,uc012cna.1,uc012cnb.1:chr3:-:5560187:5576239:Pxmp3:4-5:7	ES	E5,E7	E5,E6,E7	0.953823	1.77207	0.818247	0.00190173	0.0239699	0.226	0.115082	-0.110918
uc009cxq.2,uc012epa.1:chr6:-:90609591:90760117:Iqsec1:<2-3-4-5-6-7-8-9-10-11-12-13:15.16>	ES	E13,E15	E13,E14,E15	-1.70333	-0.508173	1.19516	0.00191313	0.0240741	0.823298	0.528524	-0.294774
uc009smm.1,uc009smn.1,uc009smo.1,uc009smp.1,uc009smq.1,uc009smr.1,uc012hel.1:chrX:+:7367120:7397689:Gripap1:15:17	ES	E15,E17	E15,E16,E17	-3.68832	-2.18442	1.5039	0.00192136	0.0240986	0.978666	0.888468	-0.0901979
uc008jgp.1,uc008jgq.1,uc008jgr.1:chr2:+:32576591:32610514:Sh2d3c:4:6-7-8-9-10-11-12-13-14>	ES	E4,E6	E4,E5,E6	1.27952	3.64611	2.36659	0.00193288	0.0241316	0.0818977	0.00705807	-0.0748397
uc009dfn.1,uc009dfo.1,uc009dfp.1,uc009dfq.1,uc009dfr.1:chr6:-:113316654:113327514:Tada3:3-4:6.7	IR	E4,E6	E4,E5,E6	1.65338	3.26647	1.61309	0.00193657	0.0241316	0.118027	0.0171637	-0.100863
uc009ljb.1,uc009ljc.1:chr8:+:32200133:32207519:Dusp26::4-5-6>	AFE	E1,E2,E4	E3,E4	2.12525	0.510826	-1.61443	0.00192766	0.0241316	0.740831	0.406361	-0.33447
uc009bcx.2,uc009bcy.2:chr6:-:29073572:29114724:Rbm28::10-11-12-13-14-15-16-17-18-19-20-21>	AFE	E1,E2,E3,E4,E5,E6,E7,E8,E10	E9,E10	2.99557	5.57899	2.58342	0.00195497	0.0243215	0.774273	0.984348	0.210075
uc008iir.1,uc008iis.1,uc008iit.1,uc008iiu.1,uc008iiv.1,uc008iiw.1,uc008iix.1,uc008iiy.1,uc008iiz.1,uc008ija.1,uc008ijb.1,uc012bqt.1:chr2:+:11627162:11655589:IL15ra,Il15ra:11:13-14>	ES	E11,E13	E11,E12,E13	0.95432	1.52466	0.570337	0.00196242	0.0243746	0.238009	0.153002	-0.0850069
uc009hgo.2,uc009hgp.2,uc012fmq.1:chr7:-:72441050:72516130:Tjp1:<1-2-3-4-5-6-7-8-9-10-11-12-13-14-15-16-17-18-19:21.22.23-24-25-26-27-28-29	ES	E19,E21	E19,E20,E21	0.935014	0.157011	-0.778003	0.00196839	0.0244094	0.16748	0.304533	0.137052
uc007gel.1,uc007gem.1,uc007gen.1,uc007geo.1,uc007gep.1,uc011xiu.1:chr10:+:80217950:80257184:Dot1l:32:34.35.36>	IR	E32,E34	E32,E33,E34	-1.69291	-0.820318	0.872591	0.00198747	0.0244842	0.602085	0.35993	-0.242155
uc007rnu.2,uc007rnv.2,uc007rnx.2,uc007rny.2,uc007roa.2,uc007rob.2,uc011zdg.1,uc011zdh.1,uc011zdi.1:chr13:+:97907891:97951151:Gfm2::16-17-18-19-20-23-24-25-27-28>	AFE	E15,E16	E3,E4,E5,E6,E7,E8,E9,E10,E11,E12,E13,E16	-2.08408	-3.63368	-1.5496	0.00198404	0.0244842	0.874523	0.980478	0.105955
uc008kio.1,uc008kip.1,uc008kiq.1,uc008kir.1,uc008kis.1,uc008kit.1,uc008kiu.1:chr2:-:84440937:84490897:Ctnnd1:15-17-18-19-20-21:23	ES	E21,E23	E21,E22,E23	-0.0110909	-0.611875	-0.600784	0.00198697	0.0244842	0.447205	0.603048	0.155843
uc008zvt.1,uc008zvu.1,uc008zvv.1,uc008zvw.1,uc008zvx.1,uc008zvy.1,uc008zvz.1,uc008zwa.1,uc008zwb.1,uc008zwc.1,uc008zwd.1,uc008zwe.1,uc008zwf.1,uc008zwg.1,uc008zwh.1,uc012eee.1:chr5:-:134833530:134932581:Gtf2ird1:9-11-12-13-14-15-16-17-18-19-20-21:23-24-25	ES	E21,E23	E21,E22,E23	-2.55894	-1.54395	1.015	0.00199038	0.0244842	0.925195	0.791414	-0.133781
uc009drb.1,uc009drc.1:chr6:-:124480361:124492377:C1s:<1.2:4-5-6-7-8-9-10-11-12-13-14>	A5SS	E2,E4	E2,E3,E4	-0.34217	0.525008	0.867178	0.00198907	0.0244842	0.504811	0.311366	-0.193445
uc007fxv.2,uc007fxw.1,uc007fxx.1,uc007fxy.2,uc007fxz.1,uc007fya.2,uc011xhu.1:chr10:+:78037244:78047247:Ilvbl::3-4-5-6-7-8-9-10-11	AFE	E1,E3	E2,E3	-1.16402	-0.093013	1.07101	0.00199817	0.024512	0.891429	0.532777	-0.358651
uc008aor.2,uc008aos.1,uc012aku.1,uc012akv.1:chr17:-:15680042:15701304:Prdm9::9-10-11-12-14>	AFE	E1,E2,E3,E4,E5,E7,E9	E8,E9	-0.0678019	1.20037	1.26818	0.00199903	0.024512	0.235212	0.499459	0.264247
uc007cak.1,uc007cal.1,uc007cam.1,uc011wpg.1:chr1:-:93270437:93295360:Ilkap:6:8-9-10-11-12-14-15-16>	IR	E6,E8	E6,E7,E8	1.37496	2.55035	1.17539	0.00201235	0.024636	0.0656569	0.0136498	-0.0520071
uc007dsc.1,uc007dsd.1,uc007dse.1,uc007dsf.1,uc007dsg.1,uc007dsh.1,uc007dsi.2,uc007dsj.1:chr1:-:175850533:175872623:Ifi203::14-16-17>	AFE	E13,E14	E7,E8,E14	-0.0846612	-1.72326	-1.63859	0.00202438	0.0247424	0.679336	0.911378	0.232042
uc007nou.1,uc007nov.1,uc007now.1,uc007nox.1,uc007noy.1,uc011ymb.1:chr12:-:56703885:56922154:Ralgapa1:20-21-22-23-25-26-27-28-29-30-31-33-34-35-36-37-38-39-40-42-43-44:46>	ES	E44,E46	E44,E45,E46	-4.15868	-2.31531	1.84337	0.00202749	0.0247424	0.986126	0.908299	-0.0778265
uc008iyg.1,uc008iyh.1,uc008iyi.1,uc008iyj.1,uc008iyk.1,uc012bsy.1:chr2:+:28323480:28326697:MRP-S2,Mrps2:7:	ALE	E7,E8	E7,E9	-0.615076	-3.13031	-2.51524	0.00204639	0.0249335	0.898663	0.270222	-0.628441
uc008erq.2,uc008err.2,uc008ers.1,uc012bcc.1,uc012bcd.1:chr18:-:38132276:38158562:Arap3::5	AFE	E1,E5	E4,E5	0.140582	1.23214	1.09156	0.00207374	0.0252267	0.313022	0.154164	-0.158858
uc009niy.2,uc009niz.2,uc009nja.1:chr8:-:112195220:112217194:2400003C14Rik:9:11	IR	E9,E10,E11	E9,E11	2.05234	0.855731	-1.19661	0.00210932	0.0255785	0.645725	0.311092	-0.334633
uc009fyu.1,uc009fyv.1:chr7:+:29178014:29184402:Paf1:<1-2-3-4:6-7-8-9-10-11-12-13-14-15>	IR	E4,E6	E4,E5,E6	2.15739	3.62272	1.46533	0.00211948	0.0256611	0.0806174	0.0163096	-0.0643078
uc007sxm.1,uc007sxn.1:chr14:+:32149909:32185169:Capn7:<1-2-3.4-5-6-7-8-9-10-11-12-13:15-16-17-18-19-20-21-22-23>	A5SS	E13,E15	E13,E14,E15	-0.70649	0.60744	1.31393	0.00213315	0.025786	0.328491	0.0785821	-0.249908
uc008iwh.2,uc012bsq.1:chr2:-:26768897:26772050:Surf1:<1-2:4-5-6-7-8-9-10>	A3SS	E2,E4	E2,E3,E4	0.669987	1.68166	1.01167	0.00214403	0.0258767	0.269197	0.108294	-0.160903
uc008ekj.1,uc008ekk.1,uc008ekl.1,uc008ekm.2,uc012bax.1,uc012bay.1:chr18:+:34568142:34602442:Pkd2l2::13-14-15	AFE	E11,E13	E12,E13	1.65292	-0.693147	-2.34607	0.00217719	0.0262357	0.206053	0.798801	0.592748
uc007ecs.2,uc007ect.2,uc007ecu.2:chr1:+:193541902:193608134:Lpgat1:<1:3	ES	E1,E3	E2,E3	-1.86872	-3.07577	-1.20705	0.00219051	0.0262724	0.724821	0.902958	0.178137
uc009kik.2,uc009kil.2,uc012fwl.1:chr7:-:148049561:148068208:Sirt3::3	AFE	E1,E3	E2,E3	-1.75964	-1.20193	0.55771	0.0021857	0.0262724	0.892948	0.814741	-0.078207
uc009saf.1,uc012hch.1:chr9:-:118980645:119002614:Plcd1:<1-2-3-4-5-6-7-8-9:11-12-13-14-15-16>	A3SS	E9,E10,E11	E9,E11	0.475998	-0.5106	-0.986598	0.00218846	0.0262724	0.594104	0.318232	-0.275872
uc009jly.2,uc009jlz.2:chr7:-:126996676:127039259:Dcun1d3::3-4>	AFE	E1,E3	E2,E3	1.14304	3.24217	2.09913	0.00219448	0.026279	0.248714	0.0255976	-0.223116
uc009gkc.1,uc009gkd.1,uc012fil.1,uc012fim.1,uc012fin.1:chr7:+:36371265:36424256:Ankrd27:<1-2-3-4-5-6-7-8-9-10-11-12:	ALE	E12,E13,E14	E12,E15,E16,E17,E18,E19,E20,E21,E22	-0.880864	-1.88071	-0.999841	0.0022081	0.0264009	0.343017	0.160809	-0.182208
uc008clg.1,uc008clh.1:chr17:+:36974085:36996325:Trim26:8:	ALE	E8,E10,E11,E12,E13	E8,E9	2.29181	3.75562	1.4638	0.00222772	0.026594	0.744997	0.944425	0.199428
uc007slb.1,uc007slc.1,uc007sld.1,uc007sle.1:chr14:+:21871854:22267768:Adk::4-5-6-7-8-9-11-12-13-14>	AFE	E1,E4	E3,E4	0.763345	1.73793	0.974588	0.00225893	0.0268	0.161531	0.0699064	-0.0916242
uc008mrx.2,uc008mry.2:chr2:+:145728976:145742161:Naa20:3:	ALE	E3,E4	E3,E5,E6,E7	-19.5262	-3.84417	15.6821	0.00225318	0.0268	0	0.181184	0.181184
uc009fsu.1,uc009fsv.1,uc009fsw.1,uc009fsx.1,uc009fsy.1,uc009fsz.1,uc009fta.1,uc009ftb.1,uc012ffu.1:chr7:-:26246720:26274511:Ceacam1:4:6-8	ES	E4,E6	E4,E5,E6	0.113011	-1.33984	-1.45285	0.00225112	0.0268	0.352882	0.604635	0.251753
uc009gtr.1,uc009gts.1,uc009gtt.1,uc009gtu.1:chr7:-:52397209:52409908:Aldh16a1,mFLJ00209:<1-2:	ALE	E2,E3	E2,E4,E5,E6,E7,E8,E9,E10,E11,E12,E13,E14,E15,E16,E17,E19	-2.20642	-4.73863	-2.53221	0.00225891	0.0268	0.30409	0.0459633	-0.258127
uc008wip.2,uc008wiq.2,uc008wir.2,uc012dru.1:chr5:-:5505014:5514976:Cldn12:<1.2:5	A5SS	E2,E5	E2,E3,E5	1.33493	-0.152718	-1.48765	0.0022653	0.026834	0.139235	0.439688	0.300454
uc008cat.2,uc008cav.1,uc008caw.1:chr17:-:34162977:34168635:H2-Ke6,Slc39a7:3-4-5-6-7-8-9.10:12	IR	E10,E12	E10,E11,E12	-0.419239	0.710037	1.12928	0.00229551	0.0271465	0.564642	0.441839	-0.122803
uc009slt.1,uc009slu.1,uc009slv.1,uc009slw.1:chrX:+:7234542:7245312:Prickle3:<1-3-4:7-8-9-10-11-12>	A3SS	E4,E7	E4,E6,E7	-1.60992	-0.666027	0.94389	0.00229875	0.0271465	0.603033	0.351443	-0.25159
uc007dbk.2,uc007dbl.2,uc011wtw.1:chr1:+:157405249:157534363:Acbd6:<1-2-3:	ALE	E3,E4	E3,E6,E7,E8,E9,E10	-1.04681	-2.25001	-1.20321	0.00231744	0.0273248	0.645546	0.386107	-0.259439
uc008zhp.2,uc012ecr.1:chr5:-:121059068:121062598:1110008J03Rik:<1:3-4>	ES	E1,E3	E1,E2,E3	-0.0542505	1.00042	1.05467	0.00236596	0.0277693	0.438076	0.246047	-0.192029
uc009ntl.2,uc009ntm.2,uc009ntn.2:chr8:-:125149035:125223009:Cbfa2t3:3:5-6-7-8-9-10-11-12-13>	ES	E3,E5	E3,E4,E5	-0.153432	-1.69035	-1.53692	0.00237462	0.0278253	0.528838	0.810227	0.281389
uc009peu.2,uc009pev.2,uc009pew.2:chr9:-:44731209:44773683:Ube4a:14-16-17-18-19-20-21-22-23:	ALE	E23,E24	E23,E25,E26,E27	-2.91068	-4.68709	-1.77641	0.00237799	0.0278253	0.345251	0.0321147	-0.313136
uc008frb.1,uc008frc.2,uc008frd.2,uc008fre.2,uc012bfb.1,uc012bfc.1:chr18:+:77303946:77394447:Miz1,Pias2::3-4-5-6-8-9-10-11-12-13-14-16-17.18>	AFE	E1,E3	E2,E3	1.35758	2.59613	1.23855	0.00238456	0.0278598	0.183331	0.0529031	-0.130428
uc009pgt.1,uc009pgu.1,uc009pgv.1,uc009pgw.1,uc012gsk.1:chr9:-:45745957:45763332:Sidt2:13-14:16-17-18-19-20-21-22-23-24-25-26-27-28.29-30>	ES	E14,E16	E14,E15,E16	0.46306	-0.348235	-0.811294	0.00240435	0.0280483	0.322067	0.548717	0.22665
uc007vah.2,uc007vai.1,uc007vaj.1,uc007vak.1,uc007val.1,uc011zqg.1,uc011zqh.1,uc011zqi.1:chr14:-:121941260:122196956:Dock9:<41.42:44	A3SS	E42,E44	E42,E43	1.34915	3.55535	2.20619	0.00241454	0.0281245	0.167404	0.0459482	-0.121455
uc007pwa.1,uc007pwb.1,uc007pwc.1,uc007pwd.1,uc007pwe.1,uc011yxo.1:chr13:+:24706478:24825675:Fam65b:4-5-6-7-8-9-10-11-12-13-14-17:	ALE	E17,E19	E17,E20,E21,E22,E23,E24,E25,E26,E27,E28	-0.000242723	-1.61021	-1.60997	0.00241857	0.0281287	0.555806	0.344567	-0.211239
uc007wkt.1,uc007wku.1:chr15:+:76369372:76372560:Gpr172b:5:7>	IR	E5,E7	E5,E6,E7	1.13498	1.99655	0.861574	0.00242811	0.0281969	0.22448	0.101379	-0.123101
uc009cyg.2,uc009cyh.2:chr6:+:91634060:91709057:Slc6a6:<1-2-3-4-5:	ALE	E5,E6	E5,E7,E8,E9,E10,E11,E12,E13,E14,E15,E16	-2.49333	-3.93846	-1.44513	0.00243943	0.0282856	0.359304	0.0804202	-0.278883
uc009bji.1,uc009bjj.1,uc009bjk.1,uc009bjl.1:chr6:+:37820810:37916289:Trim24:<1-2-3-4-5-6-7-8-9:12-13-14-15-16-17-18-19-20-21>	A5SS	E10,E12	E9,E12	0.25442	-0.310567	-0.564987	0.00244739	0.0283351	0.487068	0.345474	-0.141594
uc008ica.2,uc008icb.2,uc012boh.1:chr19:+:60887472:60912132:Fam45a:<1:3	A3SS	E1,E3	E1,E2,E3	0.469942	1.94159	1.47165	0.002482	0.0286556	0.332505	0.0773317	-0.255173
uc009put.1,uc009puu.1,uc009puv.1:chr9:-:57233762:57287921:Ppcdc:<1-2-3-4-5:7-8>	A3SS	E5,E7	E5,E6,E7	-1.17285	-0.0662142	1.10664	0.00248254	0.0286556	0.653983	0.379454	-0.274529
uc008ypg.2,uc008yph.2,uc008ypi.2:chr5:-:109983727:109988012:Crlf2:<1:3-4-5-6-8-9-10>	A3SS	E1,E3	E1,E2,E3	-0.802541	1.4287	2.23124	0.00249541	0.028761	0.55485	0.120905	-0.433945
uc007gab.1,uc007gac.1,uc007gad.1:chr10:+:79317349:79327178:Ptbp1:10:12-13-14-15>	ES	E10,E12	E10,E11,E12	-2.05838	-3.4543	-1.39592	0.00251631	0.0289149	0.893989	0.981498	0.0875087
uc009qvg.2,uc009qvh.1,uc012gxi.1:chr9:+:80012840:80159536:Myo6:<1-2-3-4-5-6-7-8-9-10-11-12-13-14-15-16-17-18-19-20-21-22-23-24-25-26-27-28:32-33	ES	E28,E32	E28,E29	0.233487	-0.738374	-0.971861	0.00254615	0.0291706	0.373255	0.67349	0.300234
uc007ofu.2,uc007ofv.1:chr12:+:86114219:86116039:Isca2:<1:3	A3SS	E1,E3	E1,E2,E3	-1.34395	-0.451967	0.891986	0.0025645	0.029251	0.782174	0.602851	-0.179323
uc008lvr.1,uc008lvs.1,uc008lvt.1,uc008lvu.1,uc008lvv.1,uc008lvw.1,uc008lvx.2,uc008lvy.2,uc008lvz.2,uc008lwa.2,uc008lwb.2,uc012ccf.1:chr2:+:120229631:120330655:Capn3,Ganc,mFLJ00088:<1-3-4-6.7-8:11-13-14-15-16-17-18-19-20-21-22-23-24-25-27-28-29-30-31.32>	IR	E8,E11	E8,E9,E10,E11	-0.877787	0.0840638	0.961851	0.00256661	0.029251	0.326048	0.120959	-0.205089
uc008yog.1,uc008yoh.1,uc008yoi.1,uc008yoj.1,uc008yok.1,uc008yol.1,uc008yom.1,uc008yon.1,uc008yoo.1:chr5:-:108998432:109058758:Gak:23-24-25-27-28-29-30:32>	IR	E30,E32	E30,E31,E32	0.822775	1.53531	0.712533	0.0025667	0.029251	0.241897	0.112195	-0.129702
uc008yot.1,uc008you.1,uc012eau.1:chr5:-:109076062:109089788:Dgkq:5-6-7-8-9-10-11-12-13-14-15:17-18-19-20-21-22-23-24-25>	IR	E15,E17	E15,E16,E17	-1.34184	-0.321584	1.02026	0.00256842	0.029251	0.49841	0.290539	-0.207871
uc007pkx.1,uc007pky.2,uc007pkz.2:chr13:-:9684081:9764560:Zmynd11:3-4:6-7-8-9.10-11-12-13-14-15-16-17>	ES	E4,E6	E4,E5,E6	-0.0715668	-0.736737	-0.66517	0.00257628	0.0292971	0.407412	0.554023	0.146611
uc008iqm.2,uc008iqn.2:chr2:-:25055231:25067009:Cobra1:<1.2:4-5-6-7-8-9-10-11	IR	E2,E4	E2,E3,E4	1.33245	2.54761	1.21516	0.00258626	0.029367	0.118075	0.03615	-0.0819254
uc008eim.1:chr18:+:31948812:31956355:Polr2d:<1-2:4>	ES	E2,E4	E2,E3,E4	-2.91936	-1.79176	1.1276	0.00259487	0.0294199	0.939694	0.811921	-0.127772
uc008vaf.2,uc008vag.2:chr4:+:131429553:131457640:Srsf4::3-4-5-6-7>	AFE	E1,E3	E2,E3	-0.353535	0.599342	0.952877	0.00259858	0.0294199	0.260313	0.121116	-0.139197
uc007ckx.1,uc007cky.1,uc007ckz.1,uc007cla.1,uc007clb.1:chr1:+:129670740:129702509:Ccnt2:<1-2-3-5-7-10:12-13-14	A5SS	E10,E12	E10,E11,E12	-1.85306	-0.349716	1.50334	0.00265178	0.029978	0.758653	0.400432	-0.358221
uc009aod.2,uc009aoe.2,uc009aof.2,uc009aog.2:chr5:+:148242155:148360077:Pan3:<1-2-3-4-5:7-8-9-10-11-12-14-15-16-17-18-19-20-21>	ES	E5,E7	E5,E6,E7	0.464773	1.47369	1.00892	0.00265626	0.0299845	0.418006	0.117161	-0.300845
uc007agb.1,uc007agc.1,uc007agd.1,uc011why.1:chr1:+:7079000:7163709:Pcmtd1::5-6-7>	AFE	E3,E5	E4,E5	0.542241	2.93042	2.38818	0.00266178	0.0300026	0.0854017	0.00291747	-0.0824842
uc009soj.2,uc009sok.2,uc009sol.2,uc009som.2,uc009son.2,uc012heo.1:chrX:-:7770975:7783651:Mporc-b,Porcn:10-11-12-13-14:	ALE	E14,E15	E14,E16,E17	-1.50413	-0.373573	1.13056	0.00268637	0.0301911	0.121524	0.308796	0.187272
uc009ahn.1,uc009aho.1:chr5:+:140807875:140814089:Nudt1:<1:3-4-5>	ES	E1,E3	E1,E2,E3	-1.72478	-0.662249	1.06253	0.0026968	0.0302641	0.817303	0.617519	-0.199784
uc007sjh.1,uc007sji.2,uc007sjj.1,uc007sjk.1,uc007sjl.1,uc011zgp.1:chr14:+:21167383:21202713:Fam149b,Fam149b1:5:7	ES	E5,E7	E5,E6,E7	-1.97479	-1.03095	0.943832	0.00271321	0.0303325	0.8266	0.654682	-0.171917
uc008cja.2,uc008cjb.2,uc008cjc.2,uc008cjd.2,uc008cje.2,uc008cjf.1,uc012arw.1:chr17:-:36034540:36047013:2610110G12Rik,Atat1:3-4-5-6-7-8:11-12	ES	E8,E11	E9,E11	-0.359434	0.396961	0.756396	0.00271871	0.0303325	0.538229	0.329381	-0.208848
uc009kgl.2,uc009kgm.2,uc009kgn.1,uc012fwd.1:chr7:-:147181853:147222289:Tubgcp2::4-5-6-7-8-9-10-11-12-13-14-15-16-17	AFE	E1,E2,E4	E3,E4	0.965081	2.74727	1.78219	0.00271075	0.0303325	0.939228	0.989712	0.0504837
uc007sjh.1,uc007sji.2,uc007sjj.1,uc007sjk.1,uc007sjl.1,uc011zgp.1:chr14:+:21167383:21202713:Fam149b,Fam149b1:10-11:13-14-15.16-17>	ES	E11,E13	E11,E12,E13	-2.50355	-1.57302	0.930532	0.0027593	0.0307178	0.892889	0.733844	-0.159045
uc007xne.1,uc007xnf.1,uc007xng.1:chr15:-:98475937:98493320:Ddx23:9:11-12-13-14-15-16-17	IR	E9,E10,E11	E9,E11	-1.37881	-2.31785	-0.939044	0.00276525	0.0307178	0.108697	0.0331875	-0.0755098
uc008jix.2,uc008jiy.2,uc008jiz.2,uc008jja.2,uc008jjb.2,uc008jjc.2,uc008jjd.2,uc012buh.1:chr2:-:34659883:34681755:Fbxw2::3	AFE	E1,E3	E2,E3	1.02845	1.95397	0.925517	0.00276333	0.0307178	0.225112	0.067109	-0.158003
uc008hrm.1,uc008hrn.1,uc008hrp.1,uc008hrq.1:chr19:-:45824748:45858269:Mgea5:7-8-9-10-11-12-13:15	ES	E13,E15	E13,E14,E15	-0.296978	-1.247	-0.95002	0.00280517	0.0310714	0.500186	0.721627	0.221441
uc008rge.1,uc008rgf.1,uc008rgg.1,uc008rgh.1,uc008rgi.1,uc008rgj.1,uc008rgk.1,uc008rgl.1,uc008rgm.1,uc008rgn.1,uc008rgo.1,uc008rgp.1,uc008rgr.1,uc008rgs.1:chr3:+:126299890:126547972:Camk2d,Camk2g,mKIAA4163:32:	ALE	E32,E33	E32,E34	-2.3979	-4.8828	-2.48491	0.00281331	0.0310719	0.155833	0.0149643	-0.140869
uc009qyy.1,uc009qyz.1,uc012gya.1:chr9:-:88583442:88614636:100039707,Gm2382:<2:4>	ES	E2,E4	E2,E3	-0.0289875	-1.20397	-1.17499	0.00281294	0.0310719	0.357593	0.663474	0.305881
uc007roz.2,uc007rpa.2,uc007rpb.2,uc011zdl.1:chr13:-:99493360:99585404:Fcho2::19-20-21-23-24-25-26-27-28-29>	AFE	E1,E2,E3,E4,E5,E6,E7,E8,E9,E10,E11,E13,E14,E15,E16,E17,E19	E18,E19	0.663961	1.66395	0.999994	0.00282153	0.0311179	0.506166	0.777806	0.27164
uc008eom.1,uc008eon.1,uc008eoo.1:chr18:-:36923324:36925868:Dnd1:<4:	ALE	E4,E5	E4,E6	1.09861	-1.46634	-2.56495	0.00285375	0.0314281	0.812121	0.265096	-0.547025
uc007iwb.1,uc007iwc.1,uc007iwd.1,uc007iwe.1:chr11:+:53270706:53281257:Shroom1:<4.5:7-9-11-13>	IR	E5,E7	E5,E6,E7	-0.711769	0.81384	1.52561	0.00286492	0.0315059	0.572231	0.20989	-0.362341
uc007bls.1,uc007blt.1,uc007blu.1,uc007blw.1:chr1:+:74331607:74400266:Pnkd::6-7-8-9-10-11-12-13>	AFE	E1,E2,E6	E5,E6	0.811049	1.69698	0.885932	0.0028902	0.0316931	0.593763	0.778678	0.184915
uc008pfh.2,uc008pfi.2,uc008pfj.2:chr3:+:54165028:54194963:Postn:<1-2-3-4-5-6-7-8-9-10-11-12-13-14-15-16:18-19	ES	E16,E18	E16,E17,E18	3.65928	2.40599	-1.25328	0.00288668	0.0316931	0.0132433	0.0635058	0.0502625
uc007vep.1,uc007veq.1,uc007ver.1,uc007ves.1,uc007vet.1,uc007veu.1,uc007vev.1:chr15:-:8241224:8415285:Nipbl:53:	ALE	E53,E54	E53,E55	-0.405465	1.02962	1.43508	0.00289481	0.0316984	0.667952	0.907293	0.239342
uc007vhd.1,uc007vhe.1,uc007vhf.1,uc007vhg.1:chr15:-:11769651:11837042:Npr3:<1:3	ES	E1,E3	E2,E3	1.60944	-1.17499	-2.78442	0.00293431	0.0320394	0.0892463	0.677795	0.588549
uc009trv.1,uc009trw.1,uc009trx.1,uc009try.1:chrX:-:82947275:83022158:Gyk:4:6-7-8-9	ES	E4,E6	E4,E5,E6	0.592423	-0.0418717	-0.634295	0.00295336	0.0322017	0.234391	0.441723	0.207332
uc007iwh.1,uc007iwi.1,uc007iwj.1:chr11:+:53333301:53357598:Sept8:5-6-7-8-9-10:12>	A3SS	E10,E12	E10,E11,E12	-1.36098	-0.294239	1.06674	0.0029932	0.0325898	0.70061	0.460303	-0.240307
uc008jbo.1,uc008jbp.1,uc008jbq.1,uc008jbr.1,uc008jbs.1:chr2:-:30040645:30061219:Ccbl1:5:7-8-9-10	ES	E5,E7	E5,E6,E7	-0.154892	0.989621	1.14451	0.00300237	0.0326433	0.505216	0.191863	-0.313353
uc009kvu.2,uc009kvv.2,uc009kvw.2,uc009kvx.2,uc012fzl.1:chr8:+:11728104:11835217:Arhgef7:<2.3-4-5-6-7-8-9-10-11-12-13-14-15-16:18-19-23-24-25>	ES	E16,E18	E16,E17,E18	-0.795467	-1.90373	-1.10826	0.00304621	0.0330731	0.57473	0.798868	0.224138
uc009grm.1,uc009grn.1,uc009grp.1,uc009grq.1,uc009grr.1,uc009grs.1:chr7:-:52132134:52147773:Med25:20-21:23.24>	IR	E21,E23	E21,E22,E23	1.01674	2.34973	1.33299	0.00306563	0.033237	0.111005	0.352839	0.241834
uc007ijc.1,uc007ijf.1,uc007ijg.1,uc007ijh.1,uc007iji.1:chr11:-:32125627:32167658:Mare,Nprl3:<1.2.3-4:6	ES	E4,E6	E4,E5,E6	0.194563	-0.999733	-1.1943	0.00311002	0.0336706	0.439397	0.693483	0.254086
uc007nez.1,uc007nfa.1,uc007nfb.2,uc007nfc.1,uc007nfd.1:chr12:+:25659796:25748010:Kidins220:<1-2.3-4-5-6-7-8-9-11-12-13-14-15-16-17-18-19-20-21-22-23-24-25-26:31-33-34-35-36-37>	ES	E26,E31	E27,E31	-0.99472	-2.17974	-1.18502	0.00313191	0.0338599	0.657626	0.872838	0.215212
uc007itr.1,uc007its.1,uc007itt.1,uc007itu.1:chr11:+:51076672:51095266:Clk4:<1-2:4.5	ES	E2,E4	E2,E3,E4	0.890383	1.86233	0.971945	0.00316347	0.0340673	0.241623	0.111708	-0.129915
uc007xwf.2,uc007xwg.2,uc007xwh.2,uc007xwi.1:chr15:+:102348676:102354107:Tarbp2:<1-2:4	ES	E2,E4	E3,E4	-2.45039	-1.54811	0.902282	0.0031644	0.0340673	0.898058	0.767549	-0.130509
uc008kvq.2,uc008kvr.2:chr2:+:91105271:91117528:Arfgap2:<1-2-3-4-5-6-7:9-10-11-12-13-14>	ES	E7,E9	E7,E8,E9	0.684443	0.0201328	-0.664311	0.00315651	0.0340673	0.297141	0.459685	0.162543
uc007nyv.1,uc007nyw.2,uc007nyx.2,uc011yoe.1:chr12:-:78038255:78063235:Max:3-4:6>	ES	E4,E6	E4,E5,E6	1.2161	1.86507	0.648971	0.00317349	0.0341172	0.18594	0.0994659	-0.0864743
uc008ief.1,uc008ieg.1,uc008ieh.1,uc008iei.1:chr2:-:3406125:3430086:Hspa14:<1-2-3-7-8-9-10-11-12-13-14-15-16:	ALE	E16,E17	E16,E18	-2.43595	-0.985043	1.4509	0.00319397	0.0342894	0.0282373	0.0972303	0.068993
uc007csl.1,uc007csm.1,uc007csn.1,uc007cso.2:chr1:-:136655643:136852517:9530009M10Rik,Ppp1r12b::21-23-24-25-26	AFE	E1,E2,E3,E4,E5,E6,E7,E8,E9,E10,E11,E12,E13,E15,E16,E17,E18,E19,E21	E20,E21	1.72066	0.797287	-0.923376	0.00321599	0.0344634	0.53746	0.302098	-0.235361
uc007ykz.1,uc007yla.1,uc007ylb.1:chr16:+:17509063:17526424:Lztr1:<1-2-3-4-5-6-7-8-9-10-11-12-13-14-15-16-17-18-20-21:23>	IR	E21,E23	E21,E22,E23	0.901049	1.46004	0.558989	0.00321916	0.0344634	0.234858	0.139529	-0.0953281
uc007kvs.1,uc007kvt.1:chr11:+:88579958:88589886:AK021127,AK214167:<1:3	A3SS	E1,E3	E1,E2,E3	0.721242	1.93338	1.21213	0.00323202	0.0345529	0.135767	0.0367597	-0.0990072
uc008ezm.2:chr18:+:58038331:58106475:Slc12a2:<1-2-3-4-5-6-7-8-9-10-11-12-13-14-15-16-17-18-19-20:22-23-24-25-26-27>	ES	E20,E22	E20,E21,E22	-2.75207	-1.26397	1.4881	0.00323882	0.0345774	0.954899	0.751543	-0.203356
uc007jvh.1,uc007jvi.1,uc007jvj.1,uc007jvk.1,uc007jvl.1,uc007jvm.1,uc007jvn.1:chr11:+:70376382:70427984:Mink1:17-18-19.20-21:23-24	ES	E21,E23	E21,E22,E23	-2.47499	-1.27406	1.20093	0.00326419	0.0347999	0.890344	0.648679	-0.241664
uc007ihg.1,uc007ihh.1:chr11:-:29445841:29448040:Rps27a::3-4-5-6-7>	AFE	E1,E3	E2,E3	2.2556	1.1131	-1.1425	0.0032833	0.034955	0.162572	0.40762	0.245048
uc008ovi.2,uc008ovj.2,uc008ovk.2:chr3:+:30754871:30796114:Gpr160:<1:3	A5SS	E1,E3	E1,E2,E3	-0.0605592	1.02695	1.08751	0.00331262	0.0352184	0.379771	0.12604	-0.253731
uc007qas.2,uc007qat.2,uc007qau.2,uc011yyg.1:chr13:+:34056527:34080334:Nqo2:<1:4	ES	E1,E4	E1,E2,E4	0.49693	1.3183	0.821368	0.00332926	0.0353345	0.303774	0.170331	-0.133443
uc008odj.1,uc008odk.1:chr2:+:172936335:172957771:AK041254,AK079954:<1:	ALE	E1,E2	E1,E3,E4,E5	-0.589623	-2.01035	-1.42073	0.00333735	0.0353345	0.457861	0.123042	-0.334819
uc008psg.1,uc008psh.1,uc008psi.1,uc008psj.1:chr3:+:87329499:87344078:Etv3:7-8:	ALE	E8,E10	E8,E9	0.583948	1.92181	1.33786	0.00333648	0.0353345	0.378572	0.740863	0.362291
uc008jtx.1,uc008jty.1,uc008jtz.1,uc008jua.1:chr2:+:60047992:60086442:March7:<1:3-4-5	ES	E1,E3	E1,E2,E3	3.4012	0.788457	-2.61274	0.00334935	0.0354127	0.0228029	0.27889	0.256087
uc009gav.2,uc009gaw.2,uc012fhc.1:chr7:-:29937528:29941229:Fam98c:<1.2.3:5	IR	E3,E5	E4,E5	2.11593	-0.2072	-2.32313	0.00335535	0.0354274	0.19802	0.446257	0.248237
uc007oso.1,uc011ypz.1:chr12:-:101363661:101397863:BC002230:<1-2:4-5-6-7-8-9-10-11-12-13-14-15>	A5SS	E2,E4	E2,E3,E4	-0.836957	0.157589	0.994546	0.00336244	0.0354534	0.672837	0.436494	-0.236342
uc007yym.2,uc012aej.1:chr16:+:32247312:32257169:Wdr53::4-5>	AFE	E1,E2,E4	E3,E4	-0.429563	0.677399	1.10696	0.00338682	0.0356615	0.807869	0.920511	0.112642
uc009iqx.1,uc009iqy.1,uc009iqz.1,uc009ira.1,uc009irb.1,uc009irc.1,uc012fqw.1:chr7:-:109267913:109358634:Nup98:15-16-17-18-19-20-21-22-23-24-26-27-28:	ALE	E28,E29	E28,E30,E31,E32,E33,E34,E35,E36,E37,E38,E39	-1.52148	-2.66446	-1.14298	0.00340996	0.035856	0.643323	0.351297	-0.292026
uc007rhh.1,uc007rhi.1,uc007rhj.1:chr13:+:81022682:81035303:Arrdc3,mKIAA1376:<1-2-4-6-7-8:10-11>	A3SS	E8,E10	E8,E9,E10	0.825834	1.92672	1.10089	0.00345043	0.0362319	0.245185	0.0896701	-0.155514
uc007aza.1,uc007azb.1,uc007azc.1,uc007azd.1,uc011wkt.1:chr1:+:53370506:53383019:Osgepl1:<1-2:4-6-7	A3SS	E2,E4	E2,E3,E4	-1.87954	-3.05272	-1.17318	0.00346683	0.0363047	0.838572	0.959681	0.121109
uc009rzz.2,uc009saa.2:chr9:+:118835653:118953237:Ctdspl::7-8-9>	AFE	E1,E2,E3,E4,E5,E7	E6,E7	1.81759	3.69903	1.88144	0.00348165	0.0364102	0.802511	0.970681	0.168169
uc009lqe.1,uc009lqf.1:chr8:+:47556395:47621404:Acsl1::3-4-5-6-7-8-9-10-11-12-13-14-15-16-17-18-19-20-21-22>	AFE	E1,E3	E2,E3	2.08369	0.868418	-1.21527	0.00349212	0.0364701	0.408604	0.740645	0.33204
uc007mek.2,uc007mel.2,uc007mem.2,uc007men.2,uc007meo.1:chr11:-:113106167:113511385:Slc39a11:4-5-6-8:10-11-12-13-14.15.16>	A5SS	E8,E10	E8,E9,E10	1.06087	2.77259	1.71172	0.00351274	0.0366356	0.284969	0.0417597	-0.243209
uc007pca.2,uc011yuu.1:chr12:+:112088488:112108208:Zfp839:<1-2:4-5-6-7-8>	ES	E2,E4	E2,E3,E4	-2.06686	-0.85349	1.21337	0.00353305	0.0367975	0.802865	0.498644	-0.304221
uc009nne.2,uc009nnf.2,uc009nng.2:chr8:-:114517339:114535205:Kars:<1:4-5-6-7-8-9-10-11-12-13-14-15-16>	ES	E1,E4	E1,E3	0.466868	1.19416	0.727292	0.00354682	0.0368908	0.267758	0.145735	-0.122023
uc008rwc.1,uc008rwd.1,uc008rwe.2,uc008rwf.2:chr3:+:159502658:159598139:Wls:<1:3-4-5-6-7-8-10-13-14-15-16>	ES	E1,E3	E1,E2,E3	1.74778	0.714917	-1.03286	0.00356776	0.0370584	0.117174	0.264734	0.14756
uc007ybj.1,uc007ybk.1:chr16:-:5008821:5013646:Rogdi::6-7-8-9-10-11-12>	AFE	E1,E2,E3,E4,E6	E5,E6	0.716766	1.96647	1.24971	0.00358105	0.0370983	0.309057	0.651186	0.34213
uc008bvb.2,uc008bvc.2,uc008bvd.2,uc012aou.1:chr17:-:31631266:31649432:Wdr4,wdr4:<1-2-3:5-6-8-9-10-11-12-13>	A5SS	E3,E5	E3,E4,E5	-1.73587	-2.95331	-1.21744	0.00358127	0.0370983	0.816038	0.957347	0.141309
uc008ljx.2,uc008ljy.2,uc008ljz.2:chr2:+:104430640:104505582:Cstf3:<1-2:4.5>	IR	E2,E4	E2,E3,E4	0.221695	1.44684	1.22514	0.00360881	0.0373332	0.384982	0.117071	-0.267912
uc009stp.2,uc009stq.3:chrX:+:20281034:20297665:Usp11:3-4-5-7-8-9-10-11-12-13-14-15:17-18-19-20-21-22-23-24>	IR	E15,E17	E15,E16,E17	-0.200671	2.30259	2.50326	0.00363655	0.0375696	0.260184	0.0223373	-0.237846
uc008tzb.1,uc008tzc.1,uc008tzd.1,uc008tze.1,uc012dib.1:chr4:+:106739623:106760596:Cyb5rl,mFLJ00377:<1-3-7-8:10-13.14>	ES	E8,E10	E8,E9,E10	-3.50634	-1.66179	1.84456	0.00364315	0.0375872	0.961258	0.786672	-0.174586
uc008whn.1,uc008who.2,uc008whq.2,uc012drq.1,uc012drr.1,uc012drs.1:chr5:-:3689999:3803109:Ankib1,mKIAA1386:<1-2-3-4-5-6-8-9-10-12-13-14-15-17.18-19-20-21:23-24-25>	A3SS	E21,E23	E21,E22,E23	-1.88707	-0.962811	0.924259	0.00366604	0.0377725	0.844431	0.71068	-0.133751
uc007jso.1,uc007jsp.1:chr11:+:69727551:69730093:Gps2::3-4-5-6-7-8-9-10-11-12>	AFE	E1,E3	E2,E3	-0.243033	0.406358	0.649391	0.0037961	0.0389557	0.223042	0.140585	-0.0824562
uc008jpk.1,uc012bvd.1:chr2:+:44966657:44969604:Gm13476::3-4>	AFE	E1,E3	E2,E3	0.590391	1.94134	1.35095	0.00382006	0.0391493	0.526065	0.213708	-0.312357
uc008zzt.1,uc008zzu.1,uc008zzv.1:chr5:+:136559785:136587730:Rasa4:13:15-16-17-18-19-20-21-22-23>	ES	E13,E15	E13,E14,E15	-1.60921	-3.86898	-2.25977	0.00383924	0.0392491	0.813159	0.970087	0.156927
uc009txe.1,uc009txf.1,uc009txh.1,uc009txi.2,uc009txj.2,uc012hmx.1:chrX:+:98469429:98516689:Med12,Nlgn3:42-44:46-48-49-50-51>	IR	E44,E46	E44,E45,E46	-1.61695	-2.31408	-0.697136	0.00384003	0.0392491	0.791836	0.893631	0.101795
uc009krr.1,uc009krs.1,uc009krt.1,uc009kru.1,uc012fyk.1:chr8:+:3515383:3544267:Pnpla6::5-6-7-8-9-10-11-12-13-14-15	AFE	E3,E5	E4,E5	-0.111226	-1.75786	-1.64663	0.00385439	0.0392912	0.282837	0.64953	0.366693
uc009ndp.1,uc009ndq.1,uc009ndr.1,uc009nds.1,uc009ndt.1,uc012gjn.1:chr8:-:108219759:108224995:Acd:11:13-14-15-16.17>	IR	E11,E13	E11,E12,E13	1.16007	2.46728	1.30722	0.00386242	0.0393208	0.179406	0.0588414	-0.120564
uc007gtp.1,uc007gtq.1,uc007gtr.1,uc007gts.1,uc007gtt.1,uc007gtu.1,uc007gtv.1,uc007gtw.1,uc007gtx.1:chr10:-:90610315:90634327:Tmpo:9:12	ES	E9,E11,E12	E9,E12	-0.0183491	0.965081	0.98343	0.00389244	0.0395147	0.365563	0.659192	0.293629
uc008tyo.1,uc008typ.1:chr4:+:106323673:106327887:Pars2::3>	AFE	E1,E3	E2,E3	-0.0870114	2.16496	2.25198	0.0038969	0.0395147	0.0909458	0.0109922	-0.0799536
uc007mcd.1,uc007mce.1,uc011ygt.1:chr11:+:109224107:109262683:Gna13:<1-2:	ALE	E2,E3	E2,E4,E5	0.342555	-0.699625	-1.04218	0.00393403	0.0397726	0.8576	0.656171	-0.201429
uc007xld.1,uc007xle.1,uc007xlf.1,uc007xlg.1,uc007xlh.1,uc007xli.1,uc007xlj.1,uc011zyn.1,uc011zyo.1:chr15:-:97623111:97674733:HDAC7,Hdac7:5-6-7-8.9-10-11:13-14	ES	E11,E13	E11,E12,E13	0.295279	1.31728	1.02201	0.00392796	0.0397726	0.332054	0.124057	-0.207997
uc007nff.1,uc007nfg.1:chr12:-:26991662:27100121:Rnf144a:<1:3-4-5-6-7-8-9-10>	ES	E1,E3	E1,E2,E3	0.156345	-1.08537	-1.24172	0.00394693	0.0398116	0.418078	0.686377	0.268299
uc008jmw.1,uc008jmx.1,uc008jmy.1:chr2:+:37298804:37421957:Rabgap1:<1:4-5-6-7-8-9-10-12-13-14-15-16-17-18-19-20-21-22-24-25-26-27-28-29-30>	A3SS	E1,E4	E1,E3	-2.27305	-0.570348	1.7027	0.00399985	0.0402925	0.86563	0.571512	-0.294118
uc009rmv.2,uc009rmw.2,uc009rmx.2,uc009rmy.2,uc009rmz.2,uc009rna.2,uc012hak.1:chr9:-:107642825:107673333:Rbm5:14-15-16-17-18-19-20:22.23-24-25-26-27-28-29-30-31>	ES	E20,E22	E20,E21,E22	-2.36983	-3.11856	-0.74873	0.00405158	0.0406535	0.885959	0.944571	0.0586122
uc007nqr.2,uc007nqs.2,uc007nqt.2,uc007nqu.2,uc007nqv.2:chr12:+:66066728:66123560:Fam179b:<1-3.4-5-6-7-8-10:12-13-14-15-16-17-18-19-20-21-22.23-24-25>	ES	E10,E12	E10,E11,E12	-0.0176683	-1.17328	-1.15561	0.00406088	0.0406936	0.408605	0.680566	0.271961
uc007iok.2,uc007iol.2,uc009vaf.1,uc009vag.1:chr11:+:46250448:46256223:Med7:3:5>	ES	E3,E5	E3,E4	-1.76247	-0.36365	1.39882	0.00409238	0.0409147	0.872036	0.481951	-0.390085
uc007kmz.1,uc007kna.1,uc007knb.1,uc007knc.1,uc007knd.1,uc007kne.1,uc007knf.1,uc007kng.1:chr11:+:82594636:82617776:Lig3:<1.2:4-5	A5SS	E2,E4	E2,E3,E4	6.66781e-10	-20	-20	0.00409361	0.0409147	0.642279	1	0.357721
uc007vsf.1,uc007vsg.1,uc007vsh.1:chr15:-:55365649:55388867:MRPL13,Mrpl13:<1-2:5-6-7-8>	ES	E2,E5	E2,E4,E5	-1.14678	-1.88959	-0.742818	0.00411007	0.0410259	0.720151	0.847126	0.126975
uc007xru.1,uc007xrv.1:chr15:-:100451770:100467296:Smagp:<1.2:4-5-6>	A5SS	E2,E4	E2,E3,E4	1.04077	0.172774	-0.867994	0.00412448	0.0410803	0.174968	0.339972	0.165004
uc007yjq.1,uc007yjr.1,uc007yjs.1:chr16:+:16983474:17047546:Mapk1:9:	ALE	E9,E10	E9,E11	-0.645437	-1.808	-1.16256	0.00412623	0.0410803	0.76687	0.466541	-0.300328
uc008fal.1,uc008fam.1:chr18:+:60720439:60732383:Rbm22:9:	ALE	E9,E10	E9,E11,E12,E13	-2.18358	-3.79715	-1.61357	0.00414338	0.0411976	0.120111	0.0314287	-0.0886819
uc008wee.1,uc008wef.1,uc008weg.1,uc008weh.1,uc012dqt.1,uc012dqu.1,uc012dqv.1:chr4:-:155028580:155043336:Mib2,dyslike:14-15:18-20-21-22-23-24-25-26-27-28.29.30>	IR	E15,E18	E15,E16,E17,E18	0.317714	1.07906	0.761351	0.00416876	0.0413429	0.359818	0.17687	-0.182948
uc008pjb.1,uc008pjc.1,uc008pjd.1,uc008pje.1,uc008pjf.1,uc008pjg.1,uc008pjh.1,uc012cqb.1:chr3:+:60277031:60433670:Mbnl1,mKIAA0428:8.9:12	ES	E11,E12	E9,E12	-0.226092	-0.728372	-0.50228	0.00418205	0.0413678	0.449768	0.290312	-0.159456
uc009czi.1,uc009czj.1,uc009czk.1,uc009czl.1,uc009czm.1,uc009czn.1,uc009czo.1,uc009czp.1,uc009czq.1,uc012epi.1:chr6:-:93625448:94233898:Magi1:<20-21-22:26-27-28-29-32>	ES	E22,E26	E22,E25,E26	-0.74242	-2.25093	-1.50851	0.00417775	0.0413678	0.547861	0.875078	0.327217
uc007pnm.2,uc007pnn.2:chr13:+:14722511:14730469:AW209491:<2:4>	A5SS	E2,E4	E2,E3,E4	-1.51134	-3.12449	-1.61315	0.00419526	0.0413918	0.787669	0.941516	0.153847
uc008zxv.2,uc012een.1:chr5:+:135644241:135657722:BCL7B,Bcl7b:<1-2:	ALE	E2,E3	E2,E4,E5,E6,E7	-2.1338	-3.30376	-1.16996	0.0041907	0.0413918	0.365331	0.116233	-0.249099
uc008hkm.1,uc008hkn.1,uc008hko.1,uc008hkp.1,uc008hkq.1,uc008hkr.1,uc008hks.1,uc008hkt.1,uc008hku.1,uc008hkv.1:chr19:-:40366529:40588302:Sorbs1,mKIAA1296:<1.2-5-6-7:9-12	ES	E7,E9	E7,E8,E9	1.31098	0.296245	-1.01474	0.00420951	0.0414791	0.163627	0.351988	0.188361
uc007vfc.1,uc007vfd.1,uc007vfe.1,uc011zrd.1:chr15:+:9001008:9040244:1110020G09Rik:<1-2-3-4-5-6-7:9-10-11-12-14>	ES	E7,E9	E7,E8,E9	-0.999139	-0.496928	0.502211	0.00424359	0.0417078	0.653788	0.557496	-0.0962911
uc008zxs.1,uc008zxt.1,uc012eek.1,uc012eel.1:chr5:+:135582782:135613792:Mlxipl,Wbscr14:13-14-15-16:18-19-20-21>	A3SS	E16,E18	E16,E17,E18	1.35052	1.80697	0.456452	0.0042384	0.0417078	0.172927	0.114269	-0.0586579
uc008pcr.1,uc008pcs.1,uc008pct.1,uc008pcu.1,uc008pcv.1,uc008pcw.1:chr3:+:41546539:41562861:D3Ertd751e:6-7:10.11.12>	ES	E7,E10	E7,E8,E9,E10	-1.64436	-0.602766	1.04159	0.00425732	0.0417892	0.721731	0.496058	-0.225673
uc008vfp.1,uc008vfq.1,uc008vfr.1,uc008vfs.1,uc012dmy.1:chr4:-:134358675:134409260:Tmem57:<1-2:5-6-8-9-10-11-12-13-15>	ES	E2,E5	E2,E4,E5	0.317225	1.60444	1.28721	0.00426629	0.0418238	0.277027	0.0753133	-0.201714
uc007bnz.1,uc007boa.1,uc007bob.1,uc007boc.1,uc011wnh.1:chr1:-:75177438:75188497:Atg9,Atg9a::10-11	AFE	E1,E2,E3,E4,E5,E6,E7,E10	E9,E10	1.47812	2.59625	1.11812	0.00431609	0.0420988	0.613205	0.83876	0.225555
uc007qjl.1,uc011yzf.1:chr13:+:49600178:49628158:Ecm2::5-6-7-8-9-10-11>	AFE	E1,E2,E3,E5	E4,E5	1.33649	2.79869	1.4622	0.00431628	0.0420988	0.925236	0.98383	0.058594
uc008waz.2,uc008wba.2,uc012dqf.1,uc012dqg.1,uc012dqh.1:chr4:-:153394578:153400153:1190007F08Rik:<1-3:6	ES	E3,E6	E3,E4,E5,E6	0.597837	2.02815	1.43031	0.00430805	0.0420988	0.217258	0.0626959	-0.154562
uc009snh.2,uc009sni.2,uc009snj.2,uc012hen.1:chrX:-:7507247:7525015:Hdac6:3-4-5-6-7-8-9-10-11-12-13-14:17	IR	E14,E17	E14,E15,E16,E17	0.81093	2.94444	2.13351	0.00430082	0.0420988	0.257849	0.0361319	-0.221717
uc008dau.1,uc008dav.2,uc008daw.1,uc008dax.1,uc012avq.1:chr17:+:56219079:56240019:Hdgfrp2:7.8:10.11-12-13-14-15-16-17-18-19	A3SS	E8,E10	E8,E9,E10	0.674398	-0.327329	-1.00173	0.00438248	0.0426902	0.314882	0.56384	0.248958
uc008rgt.1,uc008rgu.1,uc008rgv.1,uc008rgw.1,uc008rgx.1,uc008rgy.1,uc008rgz.1,uc008rha.1,uc008rhb.1,uc012cxg.1:chr3:-:126624524:127202033:AK081244,Ank2:<19-21-22-23:25-26-27-28-30-31-32-34.35-36-37-39-40-41-42-43-44-45-46-47-51-52-53-54-55-56-57-58-59>	ES	E23,E25	E23,E24,E25	-0.910166	0.151124	1.06129	0.00441466	0.0429492	0.686185	0.379726	-0.30646
uc007djj.1,uc007djk.1:chr1:-:167579075:167638225:Rcsd1:<1-2:4-5-6-7>	ES	E2,E4	E2,E3,E4	-0.53049	-1.40355	-0.873057	0.00443363	0.0430792	0.554051	0.750474	0.196423
uc007svv.2,uc007svw.2,uc007svx.2,uc011zia.1:chr14:+:31699677:31715169:Itih4:<11-12-13-14-15-16:18-19-20-21-22-23-24>	A3SS	E16,E18	E16,E17,E18	1.0857	-0.153286	-1.23899	0.00449041	0.0435757	0.269652	0.533504	0.263851
uc008odw.2,uc008odx.2,uc008odz.2,uc008oea.2,uc008oeb.2,uc008oec.2:chr2:-:173404820:173485040:Ppp4r1l-ps:<1-2:5	ES	E2,E5	E2,E4,E5	-0.624154	-1.81238	-1.18822	0.00450368	0.0436493	0.587132	0.831618	0.244486
uc007jql.2,uc007jqm.2,uc007jqn.2,uc011xww.1,uc011xwx.1:chr11:+:69393860:69405375:Trp53,p53:3-4-5-6-7-8-9:11.12-13	IR	E9,E10,E11	E9,E11	-1.84845	-4.00733	-2.15888	0.00451	0.0436555	0.108376	0.016413	-0.0919625
uc009nmt.2,uc009nmu.2,uc009nmv.1,uc009nmw.2:chr8:-:114234374:114267749:Bcar1:3:	ALE	E3,E4	E3,E6,E7,E8,E9,E10,E11	-2.16853	-3.69284	-1.52431	0.00456754	0.0441568	0.165112	0.030485	-0.134627
uc008zwp.1,uc008zwq.1:chr5:-:135095745:135115198:Eif4h:<1-2-3-4:6-7>	ES	E4,E6	E4,E5,E6	0.0840538	-0.466297	-0.55035	0.00458382	0.0442583	0.42028	0.563055	0.142776
uc008vlv.1,uc008vlw.1,uc008vlx.1,uc008vly.1,uc012dnq.1:chr4:+:138748845:138847727:Capzb:<1-3-5-6-7-8-9-10:13>	ES	E10,E13	E10,E12,E13	0.0750249	0.547897	0.472873	0.00462379	0.0445882	0.397666	0.28098	-0.116686
uc009che.1,uc009chf.1,uc009chg.1,uc009chh.1,uc009chi.1,uc009chj.1,uc009chk.1,uc009chl.1,uc009chm.1,uc009chn.1,uc009cho.1,uc012eng.1:chr6:+:71781324:71827382:Immt:<1-2-3-4:6	A3SS	E4,E6	E4,E5,E6	-0.245716	0.296647	0.542363	0.00467359	0.0450119	0.546079	0.383244	-0.162835
uc008izo.1,uc008izp.1,uc012btf.1:chr2:-:29050340:29103560:Ntng2:<1-2-3-4:7-8-9>	ES	E4,E7	E4,E5,E6,E7	-0.902265	-2.13723	-1.23497	0.00468211	0.0450375	0.594923	0.848726	0.253803
uc008cks.2,uc008ckt.2,uc008cku.1,uc008ckv.1,uc008ckw.2:chr17:-:36395817:36409192:Trim39:<1.2.3.4:6-8-9-11-12	IR	E4,E6	E4,E5,E6	-1.12003	-0.273246	0.846787	0.00479332	0.0458215	0.26115	0.112022	-0.149128
uc008oxk.2,uc008oxl.2,uc008oxn.2:chr3:+:33919000:33968266:Fxr1:<1-2-3-4-5-6-7-8-9-10-11-12:14-15-16	IR	E12,E14	E12,E13,E14	0.234212	1.00874	0.774524	0.00480541	0.0458215	0.332051	0.183703	-0.148348
uc008sqh.2,uc008sqi.2:chr4:-:43579799:43591736:Gba2,mKIAA1605:<1-2-3-4-5-6:8-9	IR	E6,E8	E6,E7,E8	-0.387283	0.36546	0.752743	0.00479276	0.0458215	0.504335	0.308864	-0.195471
uc008xeg.2,uc008xeh.2,uc008xei.2,uc012dve.1,uc012dvf.1,uc012dvg.1,uc012dvh.1:chr5:+:36100528:36227628:ABLIM2,Ablim2:17-18:22-23-24>	ES	E18,E22	E18,E20,E21,E22	-1.69029	-20	-18.3097	0.00477295	0.0458215	0.828019	1	0.171981
uc008yat.1,uc008yau.1,uc008yav.1,uc008yaw.1,uc008yax.1,uc008yay.1,uc012dyh.1:chr5:-:90656190:90795211:Ankrd17:<1.2.3-6-7-8-9-10-11-12-13-14-15-16-17-18:20	ES	E18,E20	E19,E20	-0.0286631	0.898837	0.9275	0.00478866	0.0458215	0.262053	0.0977523	-0.1643
uc009mek.2,uc009mel.2,uc009mem.2,uc009men.1,uc009mep.2,uc009meq.2:chr8:+:74200281:74214476:Insl3,Jak3:14-15-16:18	A5SS	E16,E18	E16,E17,E18	-0.858863	-1.68798	-0.829118	0.00479759	0.0458215	0.710519	0.849549	0.139029
uc007sjr.2,uc007sjs.2,uc007sjt.2,uc007sju.2,uc007sjv.2:chr14:-:21274482:21299355:Anxa7:3-4-6-7:9-10-11-12-13-14-16-17>	ES	E7,E9	E7,E8,E9	1.95613	1.24871	-0.707412	0.004836	0.0460287	0.102372	0.183359	0.0809873
uc007xyv.1,uc007xyw.1,uc007xyy.1:chr16:+:3884618:3904781:Nat15:4-5-6-7.8:10>	A5SS	E8,E10	E8,E9,E10	1.19591	0.575873	-0.620039	0.00483913	0.0460287	0.222471	0.355342	0.132871
uc009gca.1,uc009gcb.1,uc009gcc.1:chr7:+:30569808:30579559:Zfp30,mKIAA0961:6:	ALE	E6,E7	E6,E8	0.453597	-1.34146	-1.79505	0.00486273	0.0461959	0.571812	0.19336	-0.378452
uc008eok.2,uc012bbs.1:chr18:+:36904309:36917293:Ik:<1-2-3-4-5-7:9-10-11-12-13-14-15-16>	IR	E7,E9	E7,E8,E9	1.24483	2.12666	0.88183	0.00492735	0.0466367	0.149976	0.0386053	-0.111371
uc008uro.2:chr4:+:124707257:124732626:Gnl2:<1-2-3:5-6-7-8-9-10-11-12-13-14-15-16>	ES	E3,E5	E3,E4,E5	-2.05745	-3.28374	-1.22629	0.00491784	0.0466367	0.850594	0.9394	0.0888059
uc009hyu.2,uc009hyv.2,uc009hyw.1,uc009hyx.2,uc012fnk.1:chr7:-:86866049:86877662:Plin,Plin1:4-5:	ALE	E5,E6	E5,E7,E8,E9	-1.48491	-0.790566	0.69434	0.0049259	0.0466367	0.120205	0.218236	0.0980315
uc009fkl.2,uc009fkm.2,uc012fax.1:chr7:+:19661548:19668124:Dmwd::3-4	AFE	E1,E3	E2,E3	-0.0844059	1.36122	1.44563	0.00494099	0.0467082	0.867519	0.515947	-0.351572
uc007gjb.1,uc007gjc.2,uc007gjd.1,uc011xjk.1:chr10:+:81091284:81110357:Ankrd24:<3:5.6-7-8	ES	E3,E5	E3,E4,E5	-20	-0.656518	19.3435	0.00498298	0.0469893	1	0.597488	-0.402512
uc007jdi.1,uc007jdj.1,uc007jdk.1:chr11:+:59016018:59019504:Mrpl55:<1.2:5	A3SS	E2,E5	E2,E4,E5	0.0360133	-0.232652	-0.268665	0.00500918	0.0471785	0.486894	0.552986	0.0660917
uc008lgm.1,uc008lgn.1,uc008lgo.1:chr2:-:93820790:93850887:Alkbh3:<1.2:4-5-6-7-8	A5SS	E2,E4	E2,E3,E4	-0.58992	0.148973	0.738893	0.00504018	0.0474123	0.439567	0.280615	-0.158952
uc007gik.1,uc007gil.1:chr10:-:80991476:81007791:Gna11::6-7-8>	AFE	E1,E2,E3,E4,E6	E5,E6	2.60071	4.07052	1.46981	0.00505264	0.0474142	0.919205	0.984403	0.0651988
uc008kbh.1,uc008kbi.1,uc008kbj.2,uc008kbk.2:chr2:+:71711328:71741915:Pdk1:<1-2-3-4-5-7:	ALE	E7,E8	E7,E9,E10,E11,E12,E13	-3.01754	-5.02582	-2.00828	0.00506509	0.0474142	0.33014	0.0288056	-0.301335
uc008usq.2,uc008usr.2,uc008uss.2,uc008ust.2,uc008usu.1:chr4:-:125827845:125840585:1700029G01Rik::5	AFE	E1,E2,E3,E5	E4,E5	1.48489	0.469149	-1.01574	0.00505843	0.0474142	0.544095	0.297711	-0.246383
uc009rno.1,uc009rnp.1,uc009rnq.1,uc009rnr.2,uc009rnt.1,uc009rnu.2,uc009rnx.2,uc009rny.2,uc009rnz.1,uc009roa.1,uc009rob.1,uc009roc.1,uc009rod.1,uc009roe.1,uc009rof.1,uc012han.1,uc012hao.1,uc012hap.1,uc012haq.1:chr9:+:107877897:107951113:AK157941,AK197603,Cdh29,Cdhr4,D330022A01Rik,Ip6k1,Uba7,Ube1l:31-32:34>	IR	E32,E34	E32,E33,E34	-0.635168	-1.50977	-0.874599	0.00506302	0.0474142	0.4352	0.62108	0.18588
uc008baf.2,uc008bag.2,uc012anb.1,uc012anc.1:chr17:+:25377114:25379744:0610007P22Rik:2.3:6-7-8-9>	IR	E3,E6	E3,E4,E5,E6	-1.32188	-0.294919	1.02696	0.00508716	0.0475049	0.600071	0.386123	-0.213947
uc009rvc.2,uc009rvd.2,uc009rve.2,uc009rvf.2:chr9:+:110782677:110803034:Als2cl:5-6-7-8-9-10-11-12-13-14-15-16-17-18-19-20:22-23-24-25-26-27-28-29>	ES	E20,E22	E20,E21,E22	-0.325706	-1.62385	-1.29815	0.00508485	0.0475049	0.471278	0.776427	0.305149
uc007yzj.2,uc007yzk.2,uc007yzl.2,uc007yzm.2,uc007yzn.1:chr16:-:32821787:32877852:1700021K19Rik,mKIAA0226::11-12-13-14-15-16-17-18-19-20-22-23>	AFE	E10,E11	E3,E4,E5,E6,E7,E8,E11	-1.88843	-2.96293	-1.0745	0.00510556	0.0476188	0.443425	0.722438	0.279013
uc008pvq.1,uc008pvr.1,uc012crz.1:chr3:+:88357637:88373647:Ubqln4,ubin:<1-2-3-4-5-6:	ALE	E6,E7	E6,E8,E9,E10,E11,E12	-2.10626	-3.43859	-1.33233	0.00512105	0.0477053	0.501164	0.193979	-0.307185
uc007kvg.2,uc007kvh.2,uc011ycf.1,uc011ycg.1:chr11:+:87912647:88007642:Cuedc1:3-4-5-6-7:	ALE	E7,E10,E11,E12	E7,E8	0.988885	2.02552	1.03663	0.00512855	0.0477173	0.878364	0.95903	0.0806662
uc007loj.1,uc007lok.1,uc007lol.1:chr11:-:101149580:101163581:Becn1:<1-2-3-4:7-8-9-11-12-13-14-15>	IR	E4,E7	E4,E5,E6,E7	0.844953	1.49802	0.653065	0.00515375	0.0478937	0.124159	0.0549622	-0.0691968
uc008bpv.1,uc008bpw.1,uc008bpx.1,uc008bpy.1,uc008bpz.1:chr17:+:28046284:28199581:Anks1:26:28.29>	IR	E26,E28	E26,E27,E28	-0.241791	-1.18811	-0.946318	0.00525922	0.0488147	0.228824	0.398947	0.170123
uc009bda.1,uc009bdb.1,uc009bdc.1:chr6:-:29150439:29166350:Impdh1::3	AFE	E1,E3	E2,E3	-0.758414	-1.24367	-0.485254	0.00528933	0.0490349	0.856427	0.910535	0.0541079
uc007bbv.2,uc007bbw.2,uc007bbx.2,uc007bby.2:chr1:-:58487836:58502330:Ppil3:3:	ALE	E3,E4	E3,E5,E6,E7,E8,E9,E11	-2.73716	-20	-17.2628	0.0053368	0.0493557	0.0939435	0	-0.0939435
uc007ozb.1,uc007ozc.1,uc007ozd.1,uc007oze.1:chr12:+:107248472:107315620:Vrk1:<1-2-3-4-5-6.7-8-9-10-11-12-13:16>	ES	E13,E16	E13,E15	0.561689	1.88526	1.32357	0.00533144	0.0493557	0.331238	0.103498	-0.22774
uc008bef.1,uc008beg.1:chr17:+:26698456:26793878:Ergic1:5-6-7-8-9-10:	ALE	E10,E11	E10,E12	-3.19638	-1.77274	1.42364	0.0053517	0.049434	0.0355549	0.111904	0.0763496
uc007muo.2,uc007mup.2,uc007muq.1:chr11:+:120645585:120650416:Gps1:3-4-5-6-7-8-9-10-11-12-13-14:16>	IR	E14,E16	E14,E15,E16	1.92584	2.71688	0.791037	0.00537352	0.0495454	0.102305	0.0462099	-0.0560948
uc009thg.2,uc009thh.2,uc009thi.2,uc009thj.2:chrX:-:54636524:54646213:Gm7324,Rbmx:3-4-5-6-7-8-9:11	IR	E9,E10,E11	E9,E11	-0.224669	-0.803813	-0.579144	0.00538312	0.0495454	0.199448	0.107346	-0.0921018
uc008vzg.1,uc008vzh.1,uc008vzi.1,uc008vzj.1:chr4:+:151460980:151489509:Plekhg5,mKIAA0720::4-5-6-7-8-9-10-11-12-13-15-17-19	AFE	E1,E2,E4	E3,E4	-2.1805	-0.718667	1.46183	0.00540109	0.0496017	0.15751	0.381901	0.224391
uc009nhr.1,uc009nhs.1:chr8:-:109936388:109948938:Nob1:6-8:	ALE	E8,E10,E11,E12	E8,E9	2.53744	3.72503	1.18759	0.00540217	0.0496017	0.838476	0.94331	0.104834
uc007fja.2,uc007fjb.1,uc007fjc.2,uc007fjd.1,uc011xff.1:chr10:-:62206675:62255116:Ccar1:4-5-6-7-8-9-10-11-13-16-17-18:20	ES	E18,E20	E18,E19,E20	-1.57819	-2.70163	-1.12344	0.00544363	0.0498845	0.725376	0.905732	0.180356
uc007vll.1,uc007vlm.1,uc007vln.1,uc007vlo.1:chr15:+:34236435:34365995:Matn2:<1-2-3-5-6-7-8-9-10-11-12-13-14-15-17-18:20-21-22>	A3SS	E18,E20	E18,E19,E20	-0.84894	0.102124	0.951065	0.00546176	0.0498845	0.674348	0.402769	-0.271579
uc008dsk.1,uc008dsl.1,uc012axx.1:chr17:-:84230693:84246130:Haao::5	AFE	E1,E2,E3,E5	E4,E5	20	-1.09861	-21.0986	0.00546546	0.0498845	1	0.205773	-0.794227
uc008evz.1:chr18:+:47118529:47247648:Commd10:<1-2:5-6-7>	ES	E2,E5	E2,E3	-3.43172	-1.90748	1.52424	0.00545103	0.0498845	0.964311	0.82349	-0.140821
uc009txl.2,uc009txm.2,uc009txn.2,uc009txo.2,uc009txp.2,uc009txq.1,uc012hmy.1:chrX:-:98599722:98616024:Zmym3:13-14-15-16-17-18-19-20-21-22-23-24-25:27-28-29-30-31>	A5SS	E25,E27	E25,E26,E27	-2.42109	-20	-17.5789	0.0054539	0.0498845	0.924896	1	0.075104

## Sheet: sWAT
event_id	event_type	path1	path2	logoddsSN	logoddsSC	logoddsratio	pvalue	qvalue	PSI_SN	PSI_SC	delta_PSI
uc008rol.2,uc008ron.2,uc008roo.2,uc012cyp.1,uc012cyq.1,uc012cyr.1,uc012cys.1,uc012cyt.1,uc012cyu.1:chr3:-:141902548:142058660:Pdlim5:10-11:	ALE	E11,E12	E11,E16,E17,E18,E19,E20,E21	-3.54474	0.638503	4.18325	9.06961e-25	6.96183e-21	0.0890062	0.842822	0.753816
uc009mfr.2,uc009mfs.2,uc009mft.2,uc009mfu.2,uc009mfv.2:chr8:-:74864895:74945373:Eps15l1:18:	ALE	E18,E19	E18,E20,E21,E22,E23,E24	1.1636	-2.18344	-3.34704	8.0966e-18	2.07165e-14	0.44847	0.0291398	-0.41933
uc009roi.2,uc009roj.2,uc009rok.2,uc009rol.1,uc009ron.1,uc009roo.1,uc009roq.1:chr9:-:107954002:107982071:Kpc1,Rnf123:5-6-7-8-9-10-11-13-14:16-17-18-19-20-21-22-23-24-25-26-27	IR	E14,E16	E14,E15,E16	-20	1.0535	21.0535	7.85856e-18	2.07165e-14	1	0.112998	-0.887002
uc009kae.1,uc009kaf.1,uc009kag.1,uc009kah.1,uc009kai.1,uc009kaj.1,uc009kak.1,uc009kal.1,uc009kam.1,uc009kan.1,uc012fuz.1,uc012fva.1:chr7:+:137720997:137908298:Tacc2,mKIAA4180:18-19-20:23-24-25-26-27-28.29-31>	ES	E20,E23	E20,E21,E22,E23	1.43249	-1.74404	-3.17653	1.61266e-17	3.09469e-14	0.105589	0.753395	0.647806
uc009kxp.1,uc009kxq.1,uc009kxr.1,uc009kxs.1,uc009kxt.1,uc012fzy.1:chr8:+:13338750:13377702:Tfdp1:<1:4	ES	E1,E4	E1,E3,E4	-2.21504	1.02007	3.23511	1.04328e-16	1.60164e-13	0.858023	0.224469	-0.633554
uc008hfc.2,uc008hfe.2,uc008hff.2,uc008hfg.2,uc008hfh.1:chr19:-:32197216:32464204:Sgms1::11-15-16-17-18>	AFE	E10,E11	E2,E3,E5,E8,E9,E11	3.44582	0.164677	-3.28114	3.31222e-16	4.23744e-13	0.0142444	0.229369	0.215124
uc008wuo.2,uc008wup.2,uc008wuq.2,uc008wur.2:chr5:+:30062437:30113018:Dnajb6:<1-2-3-4-5-8.9-10-11:	ALE	E11,E12	E11,E13,E14	-2.69081	0.946342	3.63716	4.47331e-16	4.90531e-13	0.140681	0.863229	0.722548
uc008qpg.1,uc008qph.1,uc008qpi.1,uc012cue.1,uc012cuf.1,uc012cug.1,uc012cuh.1:chr3:-:97493751:97692630:Pde4dip:13-14-15-16-17-18-19-20-21-22-23-24-25-26-27-28:	ALE	E28,E29	E28,E30,E31,E32,E33,E34,E35,E36,E37,E38	0.737987	-3.3065	-4.04448	7.90597e-16	6.82518e-13	0.635801	0.0198433	-0.615958
uc009knj.2,uc009knk.2,uc009knl.2,uc009knm.2,uc009knn.2,uc009kno.2,uc009knp.2,uc009knq.2,uc009knr.2,uc009kns.2,uc009knt.2,uc009knu.2,uc009knv.2,uc009knw.2,uc009knx.2,uc012fxm.1:chr7:+:149684740:149701914:Tnnt3:<1-2-3:5	ES	E3,E5	E3,E4,E5	2.02547	0.64079	-1.38468	9.62038e-16	7.3846e-13	0.108598	0.326644	0.218046
uc007wir.2,uc007wis.2,uc007wit.2,uc007wiu.2,uc007wiv.2,uc007wiw.2,uc007wix.2,uc007wiy.2,uc007wiz.2,uc007wja.2,uc007wjb.2,uc007wjc.2,uc007wjd.2,uc007wje.2,uc007wjf.1,uc007wjg.1,uc007wjh.1,uc007wji.1,uc007wjj.2,uc007wjk.2,uc011zuq.1:chr15:-:76001403:76073870:Parp10,Plec,Plec1:25:27-29-30-31-32-33-34-35-36-37-38-39-40-41-42-43-44-45-46-47-48-49-50-51-52-53-54-55-56-57>	ES	E25,E27	E25,E26,E27	3.32273	-0.0901079	-3.41284	7.49113e-15	5.19385e-12	0.0269277	0.515811	0.488883
uc007ohg.1,uc007ohh.2,uc007ohj.2,uc007ohk.2,uc007ohl.2,uc007ohm.1,uc011yph.1,uc011ypi.1:chr12:+:87165622:87402843:Ttll5,mKIAA0998:<1.2-4-5-6-8-10-11-12-13-14:36-37-39	ES	E14,E36	E14,E15,E16,E17,E18,E19,E21,E22,E23,E24,E25,E26,E27,E28,E29,E30,E31,E32,E33,E34,E35,E36	-1.79455	-20	-18.2055	6.93698e-14	3.61391e-11	0.393881	1	0.606119
uc008kel.2,uc008kem.2,uc008ken.2,uc008keo.2,uc008kep.2:chr2:+:75497315:75507464:Hnrnpa3:<1:3.4-5-6-7-8-9-10-11-12	A5SS	E1,E3	E1,E2,E3	-2.14585	1.34677	3.49263	7.53289e-14	3.61391e-11	0.856011	0.176293	-0.679718
uc008ygx.1,uc008ygy.1,uc008ygz.1:chr5:-:100462597:100468241:Hnrpdl:<1-2-3-4-5-6-7:9	IR	E7,E9	E7,E8,E9	2.60521	0.0164935	-2.58871	1.05715e-13	4.50814e-11	0.065181	0.449727	0.384546
uc008wfb.1,uc008wfc.1,uc008wfd.1,uc008wfe.1,uc012dra.1:chr4:+:155221520:155233412:Dvl1:12:14-15-16-17-18-19-20	IR	E12,E14	E12,E13,E14	-0.611143	0.99618	1.60732	1.33257e-13	5.38357e-11	0.570263	0.212602	-0.357661
uc008bwg.1,uc008bwh.1,uc008bwi.1,uc012aox.1:chr17:-:32440620:32458098:AKAP95,Akap8:6-7-8-9:11-12-13-14-15-16>	A3SS	E9,E10,E11	E9,E11	2.97375	0.197768	-2.77598	2.74337e-13	1.00277e-10	0.839722	0.207507	-0.632215
uc008hzr.2,uc008hzs.2,uc008hzt.2,uc008hzu.2,uc008hzv.1,uc008hzw.1,uc008hzz.1,uc009vbz.1,uc012bnw.1:chr19:-:57107753:57389409:Ablim1::11-12-15-16-17-18-22	AFE	E10,E11	E4,E5,E6,E7,E8,E11	1.21097	-1.81671	-3.02768	2.70259e-13	1.00277e-10	0.0905386	0.613963	0.523424
uc007gaw.1,uc007gax.1,uc007gay.1,uc011xik.1:chr10:-:79439864:79447075:ORF61,mFLJ00277:<1-2-3-4-5-6-7:9-11.12	IR	E7,E9	E7,E8,E9	-0.0625472	1.7185	1.78105	3.11184e-13	1.01414e-10	0.435439	0.110239	-0.3252
uc008sqb.1,uc008sqc.1,uc008sqd.1:chr4:-:43527582:43536260:Tpm2:<1-2-3-4-5:8-9-10.11>	ME	E5,E6,E8	E5,E7,E8	-0.962706	-3.52334	-2.56064	3.17083e-13	1.01414e-10	0.405284	0.00644475	-0.398839
uc007deh.1,uc007dei.2,uc007dej.2,uc007dek.1:chr1:-:162149304:162723069:Rabgap1l,mKIAA0471::26	AFE	E25,E26	E8,E9,E10,E11,E12,E13,E15,E16,E17,E18,E19,E20,E21,E23,E26	0.758925	-2.28311	-3.04204	4.86988e-13	1.49525e-10	0.15364	0.812227	0.658588
uc008oql.1,uc008oqm.1,uc008oqn.1:chr3:-:14606288:14611256:1810022K09Rik::4-5	AFE	E1,E2,E4	E3,E4	-1.88732	2.72002	4.60734	8.62497e-13	2.45205e-10	0.36567	0.989893	0.624223
uc009kvh.2,uc009kvi.2,uc009kvj.2,uc012fzj.1:chr8:-:11514016:11550771:Cars2::8	AFE	E1,E2,E3,E4,E5,E6,E8	E7,E8	2.37325	-0.57453	-2.94778	1.6036e-12	4.37895e-10	0.758806	0.148952	-0.609853
uc008lvr.1,uc008lvs.1,uc008lvt.1,uc008lvu.1,uc008lvv.1,uc008lvw.1,uc008lvx.2,uc008lvy.2,uc008lvz.2,uc008lwa.2,uc008lwb.2,uc012ccf.1:chr2:+:120229631:120330655:Capn3,Ganc,mFLJ00088:<33-35-36-37-38-39-40-41-42-43-44-45-47-49:52-53-54-55-56-57-58-59>	ES	E49,E52	E49,E50,E51,E52	0.23991	-3.72231	-3.96222	2.10472e-12	5.21156e-10	0.376504	0.956818	0.580314
uc009lpv.1,uc009lpw.1,uc009lpx.1,uc009lpy.1:chr8:+:47249042:47280944:4933411K20Rik:<1.2:5-7-8-9>	A5SS	E2,E5	E2,E3,E5	-3.06027	3.39002	6.45029	2.30124e-12	5.5201e-10	0.923286	0.0452571	-0.878029
uc007kmd.1,uc007kme.1,uc007kmf.1:chr11:+:80242116:80285635:Psmd11:<1-2-4-5-6-7-8-9-10-11-12-13-14:16.17>	IR	E14,E16	E14,E15,E16	-1.72847	1.31846	3.04693	2.49986e-12	5.78318e-10	0.80552	0.14549	-0.66003
uc007vjf.1,uc007vjg.1,uc007vjh.1,uc007vji.1:chr15:+:25773018:25903442:Fam134b::8-9-10-11-12-13>	AFE	E1,E2,E3,E8	E6,E7,E8	2.44112	-2.08002	-4.52113	2.5616e-12	5.78318e-10	0.13462	0.903561	0.768942
uc007bzp.2,uc007bzq.2,uc007bzr.2,uc007bzs.2,uc007bzt.2,uc007bzu.2,uc011wpe.1:chr1:+:92895303:93025521:Lrrfip1:14-15:17-18	ES	E15,E17	E15,E16,E17	3.15766	-0.504748	-3.66241	3.01521e-12	6.61278e-10	0.0174774	0.514722	0.497244
uc007qeq.2,uc007qer.2,uc007qes.2:chr13:+:41096378:41108402:Pak1ip1::9-10-11-12-13>	AFE	E5,E7,E9	E8,E9	-2.89497	1.82546	4.72043	4.19121e-12	8.69506e-10	0.0805702	0.936927	0.856356
uc007qts.2,uc007qtt.1,uc007qtu.1,uc007qtv.1,uc007qtw.1,uc007qtx.1,uc007qty.1,uc007qtz.1:chr13:-:58492599:58504704:Hnrnpk,Hnrpk::9	AFE	E5,E6,E7,E9	E8,E9	-0.764575	1.66046	2.42503	4.38056e-12	8.84874e-10	0.364585	0.859326	0.494741
uc008qbf.1,uc008qbg.1,uc008qbh.1,uc008qbi.1,uc008qbj.1:chr3:+:89876615:89904526:Tpm3::4-5-6	AFE	E1,E2,E4	E3,E4	-4.03279	-0.532887	3.4999	4.80428e-12	9.4558e-10	0.00264953	0.289488	0.286838
uc009eua.1,uc012evy.1,uc012evz.1:chr6:-:149106098:149137234:Amn1:<1.2:4	A5SS	E2,E4	E2,E3,E4	-3.9814	-0.328418	3.65298	6.74149e-12	1.29369e-09	0.928244	0.351047	-0.577197
uc008qkq.2,uc008qkr.2,uc008qks.2,uc008qkt.2,uc008qku.2,uc008qkv.2,uc008qkw.2,uc012ctv.1:chr3:-:95543896:95558900:Tars2:<1-2-3-4-5.6:8-9	IR	E6,E8	E6,E7,E8	-0.0142286	2.09821	2.11244	7.7463e-12	1.45026e-09	0.416661	0.0763464	-0.340315
uc007slb.1,uc007slc.1,uc007sld.1,uc007sle.1:chr14:+:21871854:22267768:Adk:<1:	ALE	E1,E2	E1,E4,E5,E6,E7,E8,E9,E11,E12,E13,E14	1.50027	-2.21493	-3.7152	9.00945e-12	1.64658e-09	0.976437	0.351454	-0.624983
uc007khg.1,uc007khh.1,uc007khi.1,uc007khj.1,uc007khk.1,uc007khl.1,uc011xzx.1,uc011xzy.1:chr11:+:77590766:77679482:Myo18a:16-17-18-19-20-21-22-23-24-25-26-27-28-29-30-31-32-33-34-35-36-37-38-39-40-41-42-43:45-46>	ES	E43,E45	E43,E44,E45	0.859344	-1.88804	-2.74739	2.73168e-11	4.87636e-09	0.252958	0.857427	0.604469
uc008wfb.1,uc008wfc.1,uc008wfd.1,uc008wfe.1,uc012dra.1:chr4:+:155221520:155233412:Dvl1:8-9-10:12	IR	E10,E12	E10,E11,E12	-0.656785	0.712823	1.36961	3.08251e-11	5.37758e-09	0.591907	0.27395	-0.317957
uc008uhf.1,uc008uhg.1,uc008uhh.1,uc008uhi.1:chr4:+:116381175:116387709:0610037D15Rik,Ccdc163::6-7-8-10-11-12-13-14>	AFE	E1,E6	E2,E3,E4,E5,E6	0.9529	-2.56495	-3.51785	3.5298e-11	6.02106e-09	0.134782	0.886305	0.751522
uc007ngw.2,uc007ngx.2:chr12:-:31578190:31596477:Acp1:<1-2:5-6-7>	ME	E2,E3,E5	E2,E4,E5	-1.32442	0.629977	1.9544	4.22476e-11	6.89983e-09	0.219201	0.650338	0.431137
uc008ovi.2,uc008ovj.2,uc008ovk.2:chr3:+:30754871:30796114:Gpr160:<1:3	A5SS	E1,E3	E1,E2,E3	-1.75391	0.607279	2.36118	4.16908e-11	6.89983e-09	0.764808	0.230591	-0.534217
uc008hst.2,uc008hsu.2,uc008hsv.1,uc008hsx.2,uc008hsy.2,uc008hsz.1,uc008hta.1:chr19:+:46379226:46386875:Nfkb2::5-6-8-9-10-11-12-13-14-15-16-17-18-19-20-21-22-23-24-25-26	AFE	E1,E2,E5	E4,E5	2.48894	0.182322	-2.30662	4.32062e-11	6.90939e-09	0.971388	0.786608	-0.18478
uc009mav.1,uc009maw.1:chr8:+:73118379:73121189:Isyna1:<1-2-3-4:6-7-8-9-10-11-12>	IR	E4,E6	E4,E5,E6	-0.566352	1.33353	1.89988	4.53309e-11	7.10123e-09	0.556971	0.175877	-0.381093
uc007bln.1,uc007blo.1,uc007blp.1:chr1:+:74283091:74314787:Arpc2:<1.2:4.5-7-8-9-10-11-12-13-14-15>	IR	E2,E4	E2,E3,E4	1.64763	-0.736977	-2.38461	5.22398e-11	8.01986e-09	0.0752527	0.53467	0.459418
uc009rno.1,uc009rnp.1,uc009rnq.1,uc009rnr.2,uc009rnt.1,uc009rnu.2,uc009rnx.2,uc009rny.2,uc009rnz.1,uc009roa.1,uc009rob.1,uc009roc.1,uc009rod.1,uc009roe.1,uc009rof.1,uc012han.1,uc012hao.1,uc012hap.1,uc012haq.1:chr9:+:107877897:107951113:AK157941,AK197603,Cdh29,Cdhr4,D330022A01Rik,Ip6k1,Uba7,Ube1l:28:	ALE	E28,E29	E28,E31,E32	-1.46166	-0.0615675	1.40009	6.57875e-11	9.90166e-09	0.0359394	0.118993	0.0830531
uc007nqd.2,uc007nqe.2,uc007nqf.2,uc007nqg.2,uc007nqh.1,uc007nqi.2,uc011ymd.1:chr12:+:60230732:60291207:Ctage5::3-4-5	AFE	E1,E3	E2,E3	-2.71685	1.5846	4.30146	7.43662e-11	1.08059e-08	0.95456	0.21275	-0.74181
uc007hte.2,uc007htf.2,uc007htg.2,uc007hth.2,uc007hti.2,uc011xqq.1:chr11:-:3417524:3439295:Smtn:16-17:20-21-22-23-24-25>	ES	E17,E20	E17,E18,E19,E20	-4.00287	-1.23033	2.77254	7.64311e-11	1.08645e-08	0.971956	0.640874	-0.331081
uc007llr.1,uc007lls.1:chr11:-:100444149:100481482:Dnajc7,mDj11::12-13-14-15>	AFE	E11,E12	E1,E2,E3,E4,E5,E6,E7,E8,E9,E10,E12	-0.38084	-3.59348	-3.21264	9.74745e-11	1.36039e-08	0.0681682	0.700991	0.632823
uc007kvg.2,uc007kvh.2,uc011ycf.1,uc011ycg.1:chr11:+:87912647:88007642:Cuedc1:3-4-5-6-7:	ALE	E7,E10,E11,E12	E7,E8	-0.588244	1.75377	2.34201	9.97103e-11	1.36674e-08	0.557858	0.941828	0.38397
uc007pmp.1,uc007pmq.1,uc007pmr.1,uc007pms.1,uc007pmt.1:chr13:-:14090217:14131867:Tbce:16:	ALE	E16,E17	E16,E18,E19,E20,E21	1.335	-1.56499	-2.89999	1.3375e-10	1.80117e-08	0.7868	0.168188	-0.618611
uc008vtg.1,uc008vth.1,uc008vti.1,uc008vtj.1:chr4:-:147247703:147278928:Mfn2:3:5-6-7-8-9-10-11-12-13-14-15-16-17-19-20-21-22>	ES	E3,E5	E3,E4,E5	2.77862	0.532687	-2.24593	1.36863e-10	1.81131e-08	0.0300798	0.264134	0.234054
uc007ygv.2,uc007ygw.1,uc007ygx.1:chr16:-:14109258:14163444:4921513D23Rik,Lkap:<3-4-5.6-7-8-9-10-11-12-13:	ALE	E13,E14	E13,E15,E17,E18,E19,E20,E21,E22,E23,E24,E25,E26,E27,E28,E29,E30,E31,E32	-0.517833	-2.61752	-2.09969	1.63136e-10	2.12242e-08	0.815385	0.324235	-0.49115
uc009fna.2,uc009fnb.2,uc009fnc.2,uc012fbi.1:chr7:-:20286661:20300778:Tom40,Tomm40:<1:3-4-5-7-8.9-10.11-12-13-14>	IR	E1,E3	E1,E2,E3	2.14973	0.328504	-1.82123	1.84942e-10	2.32723e-08	0.0770714	0.558585	0.481514
uc008vak.2,uc008val.2,uc008vam.2,uc008van.2,uc008vao.1,uc012dma.1,uc012dmb.1,uc012dmc.1:chr4:-:131479340:131631228:Epb4.1:17:21	ES	E17,E21	E17,E20,E21	2.41748	-0.230029	-2.64751	1.92514e-10	2.38345e-08	0.0766709	0.501859	0.425188
uc007qix.1,uc007qiy.1:chr13:-:49298319:49311395:1110007C09Rik::3	AFE	E1,E3	E2,E3	1.9548	-2.12026	-4.07506	2.244e-10	2.73411e-08	0.107501	0.853116	0.745615
uc008wqd.1,uc008wqe.1,uc008wqf.1,uc008wqg.1,uc008wqh.1,uc008wqi.1,uc008wqj.1:chr5:-:23009173:23190435:Srpk2::6	AFE	E3,E4,E6	E5,E6	1.4446	-2.00052	-3.44512	2.38208e-10	2.81305e-08	0.821266	0.167408	-0.653857
uc009ade.2,uc009adg.2,uc012efb.1:chr5:+:138070350:138084130:Lrch4:<1-2-3-4-5-6-7-8-9-10-11-12-13-14-15-16-17:19.20-21-22-23-24>	A3SS	E17,E19	E17,E18,E19	0.387319	-1.70236	-2.08968	2.35405e-10	2.81305e-08	0.136349	0.568629	0.43228
uc007ujy.2,uc007ujz.2,uc007uka.1,uc011znq.1,uc011znr.1:chr14:-:66772093:66899889:Ptk2b:<1-2-3-4-5-6-7-8-9-10-11-12-13-14-15-17-18-19-20-21-22-23-24:26-27-28-30.31-32-33-34>	ES	E24,E26	E24,E25,E26	0.547656	-1.23238	-1.78003	2.42419e-10	2.81763e-08	0.270896	0.70305	0.432154
uc009kcf.1,uc009kcg.1,uc009kch.1,uc009kci.1,uc009kcj.1,uc009kck.1,uc009kcl.1:chr7:-:139903766:140005569:Fam53b::7	AFE	E5,E7	E6,E7	1.32193	-0.721157	-2.04309	2.58148e-10	2.91403e-08	0.294869	0.763061	0.468192
uc007aqi.1,uc007aqj.1,uc007aqk.1,uc011wjk.1:chr1:+:36568720:36585082:Acdp3,Cnnm3:<1-2-3.4-5-6-7-8:	ALE	E8,E10	E8,E9	3.78028	-1.01459	-4.79487	2.77025e-10	3.05192e-08	0.586176	0.0105053	-0.57567
uc007veg.1,uc007veh.1:chr15:-:7823054:8049209:Gm1943,Wdr70:<1-2-3:	ALE	E3,E4	E3,E5,E6,E7,E8,E9,E10,E11,E12,E13,E14,E15,E16,E17,E18,E19	1.7466	-0.0699193	-1.81652	2.78315e-10	3.05192e-08	0.924789	0.693589	-0.2312
uc008ojq.1,uc008ojr.1,uc008ojs.1,uc008ojt.1,uc008oju.1,uc008ojv.1,uc008ojw.1,uc008ojx.1:chr2:-:180392668:180444704:Dido1:7-9-10-11:	ALE	E11,E12	E11,E14,E15,E16,E17,E18,E19,E20,E21,E22	1.44439	-0.741773	-2.18616	3.00438e-10	3.24812e-08	0.733873	0.24861	-0.485263
uc008qpg.1,uc008qph.1,uc008qpi.1,uc012cue.1,uc012cuf.1,uc012cug.1,uc012cuh.1:chr3:-:97493751:97692630:Pde4dip::13-14-15-16-17-18-19-20-21-22-23-24-25-26-27-28	AFE	E12,E13	E6,E8,E9,E10,E11,E13	0.341562	-2.26308	-2.60464	3.0469e-10	3.24833e-08	0.568301	0.962313	0.394011
uc007wae.1,uc007waf.1,uc007wag.1,uc007wah.1,uc007wai.1,uc007waj.1,uc007wak.1,uc007wal.1,uc007wam.1,uc007wan.1,uc007wao.1:chr15:+:66409133:66476817:Phf20l1:24-25-26-27:30-31-32-33>	A5SS	E27,E30	E27,E28,E30	-2.05412	1.68688	3.741	3.43329e-10	3.61013e-08	0.614314	0.0276569	-0.586657
uc007twq.2,uc007twr.2,uc007tws.2,uc007twv.2,uc007tww.2,uc007twx.2,uc011zld.1,uc011zle.1:chr14:-:55260997:55305768:Acin1:<1-2-3:5-6-7-8-13-14	ES	E3,E5	E3,E4,E5	-2.45303	0.472517	2.92554	3.70645e-10	3.84469e-08	0.90864	0.300568	-0.608072
uc007hhz.2,uc007hia.2:chr10:-:126531314:126558216:Os9:<1-2-3-4-5-6-7-8-9-10-11-12:14-15>	ES	E12,E14	E12,E13,E14	-2.05603	-0.205441	1.85059	4.7205e-10	4.83128e-08	0.830862	0.414934	-0.415928
uc008vlv.1,uc008vlw.1,uc008vlx.1,uc008vly.1,uc012dnq.1:chr4:+:138748845:138847727:Capzb:<1-3-5-6-7-8-9-10:13>	ES	E10,E13	E10,E12,E13	2.1909	0.55005	-1.64085	5.15403e-10	5.20557e-08	0.0700995	0.280485	0.210386
uc009epm.1,uc009epn.1,uc009epo.1,uc009epp.1,uc009epr.1:chr6:-:142536381:142650794:Abcc9:21-22-23-24-25-26-27-28-29-30-31-32-33-34-35-36-37-38-39-40:42>	ES	E40,E42	E40,E41,E42	3.1434	0.0224176	-3.12098	5.94777e-10	5.92923e-08	0.0459624	0.348327	0.302364
uc009rjf.1,uc009rjg.1:chr9:+:106105438:106117718:Twf2::3-4-5-6-7-8-9-10>	AFE	E1,E3	E2,E3	4.06177	0.052942	-4.00883	6.58343e-10	6.47877e-08	0.029959	0.617962	0.588003
uc008ohy.1,uc008ohz.1,uc008oia.1:chr2:+:179759691:179770166:Lsm14b:3-4:6-7-8-9-10-11>	ES	E4,E6	E4,E5,E6	0.887188	-0.952794	-1.83998	7.64947e-10	7.43257e-08	0.214937	0.637197	0.42226
uc008jtr.1,uc008jts.1,uc008jtt.1,uc008jtu.1,uc008jtv.1,uc012bvt.1:chr2:-:59737419:59963867:Baz2b::15-16-17-18-19-20-21-22-23-24-25-26-27-28-29-30-31-32-33-34-35-36	AFE	E14,E15	E7,E8,E9,E10,E11,E12,E15	0.474324	-3.29747	-3.7718	8.59791e-10	8.14785e-08	0.110879	0.873198	0.762319
uc008ylj.2,uc008ylk.2,uc012eah.1:chr5:+:106305586:106344837:Zfp326,Znf326:5:8	ES	E5,E8	E5,E7	-4.48864	-0.217065	4.27157	8.92042e-10	8.24977e-08	0.943431	0.297621	-0.64581
uc009nfl.1,uc009nfm.1,uc009nfn.1,uc009nfo.1:chr8:+:108692774:108722604:Slc7a6:8-9:11-12-13-14-15-16.17>	IR	E9,E10,E11	E9,E11	0.773481	-1.74692	-2.52041	1.09294e-09	9.75515e-08	0.314184	0.0426959	-0.271488
uc008crn.2,uc008cro.2,uc008crp.2,uc008crq.1,uc008crr.2,uc012aui.1,uc012auj.1,uc012auk.1:chr17:-:46153942:46169326:Vegfa:<1-2-3:	ALE	E3,E4	E3,E6,E7	0.7022	-2.06053	-2.76273	1.22595e-09	1.08165e-07	0.610715	0.0700343	-0.54068
uc008dym.2,uc008dyn.2,uc008dyo.2,uc008dyp.2,uc008dyr.2,uc008dys.2,uc012ayz.1,uc012aza.1:chr18:+:4920537:5119291:Svil:3-4-5-6-7:11-13-14	ES	E7,E11	E7,E8,E9,E10,E11	1.72841	-0.708531	-2.43694	1.26055e-09	1.09954e-07	0.0310939	0.292827	0.261733
uc008mqq.2,uc008mqr.2:chr2:-:144075858:144096638:Snx5::3-4-5-6-7-8-9-10-11-12-13-14-15>	AFE	E1,E3	E2,E3	1.42085	0.390441	-1.03041	1.31466e-09	1.13386e-07	0.299298	0.644404	0.345105
uc007lpl.1,uc007lpm.1,uc007lpn.1:chr11:+:101443555:101453099:Tmem106a:<1.2:4.5-6-7-8-9-10-11-12>	IR	E2,E4	E2,E3,E4	1.44123	-0.321265	-1.76249	1.37905e-09	1.17618e-07	0.0935101	0.387681	0.294171
uc008qal.2,uc008qam.2,uc008qan.2,uc008qao.2,uc008qap.2,uc008qaq.2,uc008qar.1,uc008qas.2,uc008qat.2,uc008qau.2,uc008qav.2,uc008qaw.1,uc008qax.1,uc008qay.1,uc008qaz.2:chr3:-:89803510:89856437:Ubap2l,lig-2a:<1.2:5-6-7-9	A5SS	E2,E5	E2,E3,E5	-1.32226	1.09001	2.41226	1.50088e-09	1.25226e-07	0.738214	0.240659	-0.497555
uc008wwc.1,uc008wwd.1,uc008wwe.1,uc008wwf.1,uc008wwg.1,uc008wwh.1,uc008wwi.1,uc008wwj.1:chr5:+:31191224:31209039:Agbl5:<2.3:7-9-11-12-13-14-16-17-18-19-21-23-25-26-27>	A5SS	E3,E7	E5,E7	1.08519	-3.09104	-4.17623	1.4849e-09	1.25226e-07	0.105945	0.904742	0.798798
uc008dco.1,uc008dcp.1:chr17:-:56753721:56766326:Lonp1:<1.2-4-5-6-7-8-9:11	IR	E9,E10,E11	E9,E11	0.180371	-2.16511	-2.34548	1.90018e-09	1.56836e-07	0.278347	0.0219082	-0.256439
uc008tmn.1,uc008tmo.1,uc008tmp.1,uc008tmq.2,uc008tmr.1,uc008tms.1,uc012dgt.1,uc012dgu.1:chr4:-:87415828:87679311:Mllt3::3-4-6-7.8.9.10.11.12	AFE	E1,E3	E2,E3	0.265964	3.78419	3.51823	2.26229e-09	1.84738e-07	0.603381	0.0476612	-0.55572
uc009akw.2,uc009akx.2:chr5:-:144663572:144670708:Aimp2:<1:3-4-5>	A5SS	E1,E3	E1,E2,E3	-1.35734	0.323893	1.68123	2.88644e-09	2.33224e-07	0.726682	0.328981	-0.397701
uc007bzp.2,uc007bzq.2,uc007bzr.2,uc007bzs.2,uc007bzt.2,uc007bzu.2,uc011wpe.1:chr1:+:92895303:93025521:Lrrfip1:22:	ALE	E22,E24	E22,E25,E26,E27,E28,E29	0.807852	-1.69022	-2.49807	3.11175e-09	2.47152e-07	0.347348	0.0869832	-0.260365
uc007ovc.1,uc007ovd.1,uc007ove.1:chr12:-:104559351:104594211:Asb2::4-5-7-8-9-10-11-12>	AFE	E1,E2,E4	E3,E4	0.263124	3.45759	3.19447	3.12321e-09	2.47152e-07	0.184327	0.869475	0.685148
uc008vmf.1,uc008vmg.1,uc008vmh.1,uc008vmi.1,uc008vmj.2,uc008vmk.2,uc008vmm.2,uc012dnt.1:chr4:+:138908507:139045447:C230096C10Rik,Ubr4:<28-29-30-31-32-33-34-35-36-37-38-40-41-42-43-44-45-46-47-48-49-50-51-52-53-54-55-56-57-58-59-60-61-62-63-64-65-66-67-68-69-70-71-72-73-74-75-76-77-79-80-81-82-83-84-85-86:88-89-90-91-92-93-94-95-96-97-98-99-100-101-102-103-104-105-106-107-108-109-110-111-112-113-1…	ES	E86,E88	E86,E87,E88	-2.60361	-0.558764	2.04484	3.18907e-09	2.49788e-07	0.908977	0.532547	-0.37643
uc007rrf.2,uc007rrg.2,uc007rrh.1,uc007rri.1:chr13:+:101421297:101436368:Taf9::3	AFE	E1,E3	E2,E3	0.882326	3.60109	2.71876	3.33027e-09	2.58214e-07	0.290532	0.0149062	-0.275626
uc008akb.2,uc008akc.2,uc008ake.2,uc012ajv.1:chr17:-:10399335:10512226:Qk:9:	ALE	E9,E10	E9,E11	-4.12826	-1.03353	3.09473	3.51095e-09	2.69501e-07	0.0127603	0.264499	0.251738
uc007gbm.1,uc007gbn.1,uc007gbo.1,uc007gbp.1,uc007gbq.1,uc007gbr.1,uc007gbs.1:chr10:-:79519758:79565447:Sbno2,Sno::8-9-10-12-13-14-15-16-17-18-19-20-21-22	AFE	E3,E4,E5,E8	E7,E8	0.553308	2.77151	2.2182	3.64275e-09	2.76849e-07	0.509711	0.907427	0.397716
uc007bui.2,uc007buj.2,uc011wod.1:chr1:-:87613657:87633181:A630001G21Rik:3-4:6-7-8>	A3SS	E4,E6	E4,E5,E6	-3.78563	-0.727873	3.05775	3.76413e-09	2.77821e-07	0.957264	0.568578	-0.388686
uc007eth.2,uc007eti.2,uc007etj.2,uc007etk.2,uc007etl.2,uc007etm.2,uc007etn.2,uc007eto.2,uc011xcg.1,uc011xch.1:chr10:-:30348816:30522913:Ncoa7::16-17-18-20-22.23.24>	AFE	E1,E3,E4,E5,E6,E7,E8,E10,E11,E12,E13,E14,E16	E15,E16	-2.35644	0.02842	2.38486	3.72703e-09	2.77821e-07	0.00915487	0.0858211	0.0766662
uc008hxj.1,uc008hxk.1,uc008hxl.1,uc012bnm.1:chr19:-:55141757:55201706:Gpam,mKIAA1560::5-6-7-8-9-10-11-12-13-14-15-16-17-18-19-20-21.22-23-24-25.26>	AFE	E1,E3,E5	E4,E5	-0.431822	3.02399	3.45581	3.76266e-09	2.77821e-07	0.196025	0.915348	0.719323
uc009fqv.2,uc009fqw.2,uc009fqx.2,uc009fqy.2,uc009fqz.2,uc009fra.1,uc009frb.1:chr7:+:25688004:25711610:Arhgef1,mFLJ00369::3-4-5-6-7-8-9-10-11-12	AFE	E1,E3	E2,E3	2.40728	0.995662	-1.41161	3.92265e-09	2.86765e-07	0.0781348	0.321118	0.242983
uc009buq.2,uc009bur.2,uc012elf.1:chr6:+:48504797:48520721:Lrrc61:2:4>	ES	E2,E4	E2,E3	1.18036	-1.26714	-2.4475	4.24931e-09	3.04838e-07	0.159888	0.697025	0.537137
uc007fqb.2,uc007fqc.2:chr10:+:74523640:74647668:Bcr::18-19-20-21-22-23-24>	AFE	E1,E2,E3,E4,E5,E6,E7,E8,E9,E10,E11,E12,E13,E14,E15,E16,E18	E17,E18	0.63942	3.7951	3.15568	4.51825e-09	3.21131e-07	0.145104	0.808585	0.663482
uc008vfx.1,uc008vfy.1,uc008vfz.1:chr4:+:134479539:134483285:D4Wsu53e:<1-2-3:6-7>	A3SS	E3,E6	E3,E4,E5,E6	1.37565	-0.92976	-2.30541	4.93564e-09	3.47578e-07	0.0515456	0.392754	0.341209
uc007pdk.2,uc007pdl.2,uc007pdm.2:chr12:+:112812720:112894438:Mark3:<1-2-3-4-5-6-7-8-9-10-11-12-13-14-15:18>	ES	E15,E18	E15,E16	0.569772	-1.672	-2.24178	5.00428e-09	3.49208e-07	0.337681	0.822454	0.484773
uc007vot.2,uc007vou.1,uc007vov.1,uc007vox.2,uc007voy.1,uc007voz.1,uc007vpa.1,uc011zso.1:chr15:+:41279027:41692593:Oxr1::9-10-11-12-13-14-15-16	AFE	E1,E3,E4,E9	E6,E9	-3.6707	-0.11473	3.55597	5.33097e-09	3.68653e-07	0.00778904	0.242493	0.234704
uc008gmj.2,uc008gmk.2,uc008gml.1:chr19:+:8797976:8800932:AK036616,Snhg1:5:7	IR	E5,E7	E5,E6,E7	2.81178	0.320954	-2.49083	5.70599e-09	3.91064e-07	0.0444247	0.267206	0.222781
uc009qnk.1,uc009qnl.1,uc009qnm.1,uc009qnn.1:chr9:+:69837307:69856124:Bnip2:<1-2-3-4-5-6-7-8-9:12>	ES	E9,E11,E12	E9,E12	-1.5581	0.946826	2.50492	5.79533e-09	3.93672e-07	0.142119	0.682151	0.540032
uc007ggc.2,uc007ggd.2,uc011xjc.1:chr10:-:80616715:80630465:PIAS-gamma,Pias4:4-5-6-7-8:	ALE	E8,E10,E11,E12,E13	E8,E9	1.49134	4.80717	3.31583	6.17889e-09	4.16045e-07	0.839255	0.996591	0.157336
uc007mnd.2,uc007mne.2,uc007mnf.2,uc007mng.2:chr11:+:117060974:117223639:Sept9::4	AFE	E1,E2,E4	E3,E4	-0.744055	1.95102	2.69508	6.23446e-09	4.16137e-07	0.490913	0.924222	0.433309
uc007hss.1,uc007hst.1,uc007hsu.1:chr11:-:3243299:3309238:Limk2::4-5-6-8-9-10-11-12-13-14-15-16-17-18>	AFE	E1,E2,E4	E3,E4	3.30412	0.579604	-2.72451	6.29861e-09	4.16794e-07	0.978853	0.725542	-0.253311
uc007gca.1,uc007gcb.1,uc007gcc.1,uc007gcd.1:chr10:+:79611034:79621112:Midn:<1-2-3-4:6	ES	E4,E6	E4,E5,E6	-0.40748	1.05119	1.45867	6.8518e-09	4.49525e-07	0.495736	0.182134	-0.313601
uc008qnx.2,uc008qny.2,uc008qnz.2:chr3:-:96509814:96512483:Nudt17:7:9	IR	E7,E9	E7,E8,E9	0.83071	-1.01342	-1.84413	7.22655e-09	4.70093e-07	0.177306	0.551259	0.373953
uc009kae.1,uc009kaf.1,uc009kag.1,uc009kah.1,uc009kai.1,uc009kaj.1,uc009kak.1,uc009kal.1,uc009kam.1,uc009kan.1,uc012fuz.1,uc012fva.1:chr7:+:137720997:137908298:Tacc2,mKIAA4180:7-9-10.11.12-14.15-16:18-19-20	A5SS	E16,E18	E16,E17,E18	0.784348	-1.28068	-2.06502	7.77378e-09	5.01442e-07	0.289997	0.737238	0.447241
uc009nhb.1,uc009nhc.1,uc009nhd.1,uc009nhe.1,uc009nhf.1:chr8:-:109593301:109620445:Terf2,mTRF2:11.12:	ALE	E12,E13	E12,E15,E16,E17	0.0865575	-2.87622	-2.96278	8.11316e-09	5.18972e-07	0.556065	0.0521068	-0.503958
uc008xar.1,uc008xas.2,uc012duq.1,uc012dur.1:chr5:+:33721199:33762403:4933407H18Rik:<1.2.3.4:6-7.8-9-10-11-12	IR	E4,E6	E4,E5,E6	0.792524	-1.64668	-2.43921	8.869e-09	5.62632e-07	0.17293	0.786106	0.613176
uc007txj.1,uc007txk.2,uc007txl.2,uc011zlh.1:chr14:-:55525140:55531969:Slc22a17::8	AFE	E1,E2,E4,E5,E6,E8	E7,E8	2.09413	-0.296918	-2.39105	9.68879e-09	6.04644e-07	0.846885	0.327507	-0.519378
uc009mkl.2,uc009mkm.2,uc009mkn.2,uc012ggr.1,uc012ggs.1:chr8:-:86095596:86118390:Tecr:6.7:9.10-11-12-13-14-15-16-17>	IR	E7,E9	E7,E8,E9	1.48302	2.81946	1.33643	1.03892e-08	6.43128e-07	0.150371	0.0356148	-0.114756
uc008gjk.2,uc008gjl.1,uc008gjm.1,uc012bhq.1:chr19:-:7012559:7016940:Gpr137:8:10-11-12-13>	ES	E8,E10	E8,E9,E10	-0.174655	-1.21184	-1.03719	1.11122e-08	6.82376e-07	0.383102	0.61811	0.235007
uc007bzp.2,uc007bzq.2,uc007bzr.2,uc007bzs.2,uc007bzt.2,uc007bzu.2,uc011wpe.1:chr1:+:92895303:93025521:Lrrfip1::14-15	AFE	E10,E11,E12,E13,E14	E3,E14	-1.23729	1.33432	2.5716	1.12164e-08	6.8331e-07	0.0884415	0.554949	0.466508
uc008ryf.2,uc008ryg.2,uc008ryh.1,uc008ryi.2,uc008ryj.2,uc008ryk.2,uc008ryl.2,uc008rym.1,uc008ryn.2,uc008ryo.2,uc008ryp.1,uc012dak.1:chr4:-:9376231:9596491:Asph::5-7	AFE	E3,E5	E4,E5	2.86502	-1.34779	-4.21281	1.28325e-08	7.69549e-07	0.0666745	0.872976	0.806301
uc007aof.1,uc007aog.1,uc007aoh.1,uc007aoi.1,uc007aoj.1,uc007aok.1,uc007aol.1,uc007aom.1,uc007aon.1,uc007aoo.1,uc007aop.1:chr1:+:33965069:34365497:Bpag1,Dst:<35-36-37-38-39-40-41-44-45-46-47-48-49-50-51-52-53-54-55-56-57-58-59-60-61-63-64-65-66-67-68-69-70-71-72-73-74-75-76-77-78-79-80-81-82-83-84-85-86-87-88-89-90-91-92-93-94-95-96-97-98-99-100-101-102-103-104-105-106-107:109-110-111-112>	ES	E107,E109	E107,E108,E109	2.65449	0.558534	-2.09595	1.29608e-08	7.71218e-07	0.0321132	0.269626	0.237513
uc007cym.1,uc007cyn.1,uc007cyo.1,uc007cyp.1:chr1:+:153191627:153211575:Ivns1abp:<1-2-3-4-5-6-7:9	A3SS	E7,E9	E7,E8,E9	-0.890364	1.00622	1.89658	1.38973e-08	8.1432e-07	0.319979	0.0559703	-0.264008
uc008bcp.1,uc008bcr.1,uc008bct.1,uc012ano.1,uc012anp.1,uc012anq.1:chr17:-:26063368:26078907:Pigq,mGpi1:<1-2-4.5.6-7:	ALE	E7,E11,E12,E13,E14,E15,E16,E17	E7,E8,E9,E10	1.05421	3.11086	2.05665	1.38652e-08	8.1432e-07	0.423166	0.0228686	-0.400298
uc007muc.1,uc007mud.1:chr11:-:120572254:120575081:Stra13:<1:3	ES	E1,E3	E1,E2,E3	1.05347	-0.268416	-1.32189	1.42241e-08	8.16005e-07	0.136179	0.384718	0.248539
uc008fat.1,uc008fau.1,uc008fav.1,uc008faw.1,uc008fax.1:chr18:-:60845629:60908319:Ndst1::5-6-7-8-9-10-11-12-13-14-15-16-17-18>	AFE	E1,E5	E2,E5	0.357163	-3.3673	-3.72446	1.40357e-08	8.16005e-07	0.514849	0.988734	0.473885
uc009ncp.1,uc009ncq.1,uc009ncr.1:chr8:-:107836239:107850176:Lrrc29:<1-2:	ALE	E2,E3	E2,E4,E5,E6,E7,E8	-1.6244	0.834372	2.45877	1.4245e-08	8.16005e-07	0.237356	0.784701	0.547345
uc008qzk.2,uc008qzl.2,uc008qzm.2,uc008qzn.2:chr3:+:108456830:108481758:Clcc1:<1.2:7-8-9-10-11-12-13-14-15-16	A5SS	E2,E7	E4,E7	-1.94913	0.170829	2.11996	1.45165e-08	8.25398e-07	0.833106	0.409158	-0.423948
uc009bhh.1,uc009bhi.1,uc009bhk.1,uc009bhl.1:chr6:+:34548543:34725469:Cald1::5-7.8	AFE	E1,E2,E3,E5	E4,E5	-1.76603	0.570772	2.3368	1.65328e-08	9.33128e-07	0.134836	0.593469	0.458633
uc007bim.2,uc007bin.2,uc007bio.2,uc007bip.1,uc007biq.2,uc011wml.1:chr1:-:66765816:66864169:1110028C15Rik::6	AFE	E1,E2,E3,E6	E4,E5,E6	5.12553	1.17788	-3.94765	2.30342e-08	1.28124e-06	0.00223259	0.134003	0.131771
uc008glh.1,uc008gli.1,uc008glj.1:chr19:+:7631948:7663035:Pla2g16:<1.2:4-5-6-8>	A5SS	E2,E4	E2,E3,E4	-0.663322	1.70635	2.36968	2.45298e-08	1.34741e-06	0.489327	0.0692407	-0.420086
uc009nus.2,uc009nut.2,uc009nuu.2,uc009nuv.2,uc009nuw.2,uc009nux.2,uc009nuy.1,uc009nuz.2:chr8:-:125766255:125778075:1300018I17Rik:14-15-16-17:19-22-23>	A5SS	E17,E19	E17,E18,E19	0.99164	3.77659	2.78494	2.4575e-08	1.34741e-06	0.248364	0.016276	-0.232088
uc008iho.1,uc008ihp.1,uc012bpd.1:chr2:+:10002238:10014328:Kin:4:7>	IR	E4,E7	E4,E5,E6,E7	-2.5436	0.705787	3.24939	2.49718e-08	1.35946e-06	0.685881	0.0800584	-0.605823
uc008fao.2,uc008fap.2,uc008faq.2,uc008far.2,uc008fas.2:chr18:-:60753643:60789739:Synpo:5.6:	ALE	E6,E10	E6,E7,E8	1.41321	-2.08786	-3.50107	2.77781e-08	1.50158e-06	0.723533	0.0600125	-0.663521
uc007axy.1,uc007axz.1,uc007aya.1,uc007ayb.1,uc007ayc.1,uc007ayd.1:chr1:+:52176281:52218707:Stat1:8-9-10-11-12-13-14-16-17-18-20-21-22-23-25-26-27-28-29-30-31:	ALE	E31,E32	E31,E33,E34	0.349996	-2.09685	-2.44684	2.81087e-08	1.50883e-06	0.922245	0.549654	-0.372591
uc008hry.1,uc008hrz.1,uc008hsa.1,uc012bmr.1:chr19:-:46107090:46119701:Ldb1:12:	ALE	E12,E13	E12,E14	0.20542	-1.36098	-1.5664	2.8908e-08	1.54096e-06	0.928937	0.719306	-0.209631
uc008hom.1,uc008hon.1,uc008hoo.1,uc008hop.1:chr19:-:43738291:43749371:Slc25a28:<1-2:5	IR	E2,E5	E2,E3,E4,E5	-0.459924	0.84329	1.30321	3.84023e-08	2.01902e-06	0.226027	0.0763171	-0.14971
uc007eiy.1,uc007eiz.2,uc007eja.1,uc007ejc.1,uc011xab.1:chr10:-:9475344:9620838:Stxbp5:<1-2-3-4-5-6-7-8-9-10-11-12-13-14-15-16-17-18-20:24.25-26.27-29-30-31-33-34>	ES	E20,E24	E20,E21,E22,E24	1.63152	-1.12963	-2.76115	4.25059e-08	2.21956e-06	0.131151	0.722378	0.591227
uc007zxy.1,uc007zxz.1,uc007zya.1,uc007zyb.2,uc012aii.1:chr16:+:91648068:91679437:Son,mKIAA1019:9-10:13-14-15	ES	E10,E13	E10,E12	0.1248	2.39124	2.26644	4.35884e-08	2.2607e-06	0.403019	0.0500533	-0.352965
uc007yzc.2,uc007yze.2,uc007yzf.2,uc012aeo.1:chr16:+:32644728:32683579:Tnk2:11-12:14-15-16-17>	ES	E12,E14	E12,E13,E14	1.88888	-0.105276	-1.99416	4.47371e-08	2.30471e-06	0.101375	0.496529	0.395154
uc007dms.1,uc007dmt.1,uc007dmu.1,uc007dmv.1,uc011wvv.1:chr1:-:172890688:172906678:Fcgr2b:<3.4-5-6-7-8:12-13>	ES	E8,E10,E11,E12	E8,E12	0.371112	-1.08839	-1.45951	4.78831e-08	2.45034e-06	0.491583	0.163604	-0.327979
uc007joc.2,uc007jod.2,uc007joe.2,uc007jof.1:chr11:-:68634948:68685357:Ndel1:3-4-5-6-7-8-9:12>	ES	E9,E11,E12	E9,E12	-1.79498	-0.0874978	1.70748	5.18477e-08	2.63565e-06	0.128489	0.432402	0.303912
uc009kfe.1,uc009kff.1:chr7:+:146038068:146074739:Ppp2r2d::3	AFE	E1,E3	E2,E3	4.7487	1.55916	-3.18954	5.25975e-08	2.65618e-06	0.0677925	0.687902	0.620109
uc009kxg.1,uc009kxh.1,uc009kxi.1,uc009kxj.1,uc009kxk.1,uc009kxl.1,uc012fzx.1:chr8:-:13255962:13288126:Dcun1d2:6:9>	ES	E6,E9	E6,E8	0.887303	-1.98707	-2.87437	5.35325e-08	2.68572e-06	0.212094	0.829435	0.617341
uc008ubw.1,uc008uby.1,uc012dih.1,uc012dij.1:chr4:+:108673409:108734376:Nrd1::4-5-6-7-8-9-10-11-12-13-14-15-16-17-18-19-20-21-22-23-24-25-26-27-28-29-30-31-32>	AFE	E1,E2,E4	E3,E4	0.223897	3.20184	2.97795	5.84786e-08	2.91482e-06	0.64612	0.985387	0.339267
uc009erf.2,uc009erg.2,uc012evp.1:chr6:+:145159653:145165062:Lyrm5:<2:5-6>	A5SS	E2,E5	E3,E5	-0.289227	2.16794	2.45717	6.08705e-08	3.01446e-06	0.387711	0.0345219	-0.353189
uc007wgh.2,uc007wgi.2,uc011zug.1,uc011zuh.1,uc011zui.1,uc011zuj.1:chr15:+:74785480:74790335:Ly6e:<1.2:5	IR	E2,E5	E2,E3,E4,E5	-2.43219	-0.420531	2.01166	6.12782e-08	3.0152e-06	0.847359	0.485737	-0.361621
uc007sme.2,uc007smf.1,uc007smg.1,uc007smh.1,uc007smi.1,uc007smj.1,uc007smk.1,uc007sml.1,uc011zgv.1,uc011zgw.1,uc011zgx.1,uc011zgy.1,uc011zgz.1,uc011zha.1,uc011zhb.1,uc011zhc.1,uc011zhd.1,uc011zhe.1,uc011zhf.1,uc011zhg.1,uc011zhh.1,uc011zhi.1,uc011zhj.1,uc011zhk.1:chr14:-:24117982:24833713:Kcnma1,Slo:<31-32:34-35>	ES	E32,E34	E32,E33,E34	2.47959	-1.67308	-4.15266	6.22249e-08	3.04228e-06	0.143024	0.803779	0.660755
uc008mmn.1,uc008mmo.1:chr2:+:132088992:132137777:Cds2:<1-2-3-4:	ALE	E4,E5	E4,E6,E7,E8,E9,E10,E11,E12,E13,E14	-0.16574	-2.83285	-2.66711	6.59155e-08	3.20233e-06	0.880871	0.348856	-0.532015
uc007swk.1,uc007swl.1,uc007swm.1,uc007swn.1,uc007swo.1,uc007swp.1,uc007swq.1:chr14:+:31832323:31934778:Pbrm1:<18-19-20-21-22-23-24-25-26-27-28-29:32-33-34>	ES	E29,E32	E29,E31	-2.24213	0.268485	2.51061	6.64915e-08	3.20999e-06	0.854149	0.324896	-0.529253
uc009peu.2,uc009pev.2,uc009pew.2:chr9:-:44731209:44773683:Ube4a:7-8-9-10-11-12:14-16-17-18-19-20-21-22-23	IR	E12,E14	E12,E13,E14	0.458117	3.15981	2.70169	6.75028e-08	3.23845e-06	0.09002	0.00684152	-0.0831784
uc007bzp.2,uc007bzq.2,uc007bzr.2,uc007bzs.2,uc007bzt.2,uc007bzu.2,uc011wpe.1:chr1:+:92895303:93025521:Lrrfip1:17-18:22	ES	E18,E22	E18,E19,E20,E22	1.57701	-0.284474	-1.86148	7.27393e-08	3.468e-06	0.168173	0.429922	0.261749
uc007ypv.1,uc007ypw.1,uc007ypx.1:chr16:+:20517136:20532593:Dvl3:4-5-6:8	IR	E6,E8	E6,E7,E8	-1.09776	0.337436	1.4352	7.45656e-08	3.53312e-06	0.640832	0.289584	-0.351248
uc008ort.2,uc008oru.1:chr3:-:19125917:19211322:Pde7a::3-4-5-6-7-8-9-10-11-12-13-14>	AFE	E1,E3	E2,E3	5.0073	0.076961	-4.93034	8.03137e-08	3.78213e-06	0.0194889	0.719477	0.699988
uc009uqf.1,uc009uqg.1:chrX:-:148771394:148777027:Tspyl2:<1-2:4-5-6-7-8>	IR	E2,E4	E2,E3,E4	-0.880246	0.976564	1.85681	8.22062e-08	3.84765e-06	0.624709	0.238919	-0.38579
uc008uca.2,uc008ucb.2,uc008ucc.2:chr4:-:108733749:108874877:Osbpl9::6-7-8-9	AFE	E1,E2,E3,E4,E6	E5,E6	-1.53887	0.167892	1.70676	8.46523e-08	3.93813e-06	0.0803859	0.288259	0.207873
uc008wda.2,uc008wdb.2:chr4:+:154624074:154630796:2610002J02Rik::3-4-5>	AFE	E1,E3	E2,E3	1.61467	-0.550802	-2.16547	8.95828e-08	4.11759e-06	0.0416732	0.277132	0.235458
uc007itz.1,uc007iua.1,uc007iub.1:chr11:-:51413601:51420383:Hnrnpab:<1-2-3-4-5-6:9.10>	ES	E6,E9	E6,E7,E9	-1.15777	0.365407	1.52318	9.8336e-08	4.49302e-06	0.667765	0.298956	-0.368809
uc008boy.2,uc008boz.2,uc008bpa.2,uc008bpb.2,uc008bpc.2,uc008bpd.2,uc012anw.1,uc012anx.1,uc012any.1,uc012anz.1,uc012aoa.1,uc012aob.1,uc012aoc.1,uc012aod.1:chr17:+:27693518:27700617:Hmga1,Hmga1-rs1:4:7	A5SS	E4,E7	E4,E5,E6,E7	-0.780184	0.322725	1.10291	9.95055e-08	4.51955e-06	0.486218	0.231779	-0.254439
uc009roi.2,uc009roj.2,uc009rok.2,uc009rol.1,uc009ron.1,uc009roo.1,uc009roq.1:chr9:-:107954002:107982071:Kpc1,Rnf123:<2.3:5-6-7-8-9-10-11-13-14	A5SS	E3,E5	E3,E4,E5	-0.440779	1.83944	2.28021	1.10255e-07	4.97835e-06	0.349621	0.064603	-0.285017
uc008afk.2,uc008afl.2,uc008afm.2,uc008afn.2,uc008afo.2,uc008afp.2,uc008afr.1,uc008afs.1,uc008aft.1,uc008afu.1,uc008afv.1,uc008afw.1,uc012ajh.1:chr17:+:5941279:6044290:Synj2,mKIAA0348::8-9-10-12.13-14-15-16-17-18-19-20	AFE	E1,E3,E4,E6,E8	E7,E8	4.20469	0.77319	-3.4315	1.19682e-07	5.31885e-06	0.79143	0.0782378	-0.713192
uc008bai.2,uc008baj.2,uc008bak.2,uc008bal.2:chr17:-:25397455:25411255:Ube2i:4-5-6:	ALE	E6,E7	E6,E8,E9,E10	-0.386325	-2.61747	-2.23115	1.19875e-07	5.31885e-06	0.38667	0.047687	-0.338983
uc009pdo.1,uc009pdp.1,uc009pdq.1,uc012grv.1:chr9:-:44218246:44226090:Ccdc84:11.12:14	IR	E12,E14	E12,E13,E14	0.756231	-0.885374	-1.64161	1.18929e-07	5.31885e-06	0.158699	0.449929	0.291231
uc008xeg.2,uc008xeh.2,uc008xei.2,uc012dve.1,uc012dvf.1,uc012dvg.1,uc012dvh.1:chr5:+:36100528:36227628:ABLIM2,Ablim2:10-11-13-14-15:17-18	ES	E15,E17	E15,E16,E17	1.15486	-1.72713	-2.88199	1.32383e-07	5.8067e-06	0.211024	0.764675	0.55365
uc009kgl.2,uc009kgm.2,uc009kgn.1,uc012fwd.1:chr7:-:147181853:147222289:Tubgcp2::4-5-6-7-8-9-10-11-12-13-14-15-16-17	AFE	E1,E2,E4	E3,E4	-0.613523	2.39095	3.00447	1.49109e-07	6.46644e-06	0.735873	0.98498	0.249107
uc007det.1,uc007deu.1,uc007dev.1,uc007dew.1,uc007dex.1,uc011wun.1:chr1:+:162965296:162968668:Gas5:5:7	IR	E5,E7	E5,E6,E7	2.1373	0.767134	-1.37017	1.58041e-07	6.80964e-06	0.0590684	0.190632	0.131564
uc008upi.2,uc008upj.2,uc008upk.2,uc008upl.2,uc008upm.1,uc008upn.1,uc008upq.1,uc008upr.2,uc008upt.1:chr4:-:123026875:123361603:Macf1:56-57-58-59-60-61-62-63-64-65-66-67-68-69-70-71-72-73-74-75-76-77-78-79-80-81-82-83-84-85-86-87-88-89-90-91-92-93-96-97-98:100-101	ES	E98,E100	E98,E99,E100	1.77013	-0.330885	-2.10102	1.58797e-07	6.80964e-06	0.105951	0.539847	0.433896
uc007bch.2,uc007bci.2,uc007bcj.2:chr1:-:58579649:58643177:Fam126b:<1-3-4-5-6-7-8-9-10-11-12:14>	ES	E12,E14	E12,E13,E14	-2.07967	0.605202	2.68487	1.63554e-07	6.95411e-06	0.843395	0.247403	-0.595992
uc007gaw.1,uc007gax.1,uc007gay.1,uc011xik.1:chr10:-:79439864:79447075:ORF61,mFLJ00277:9-11.12:14-15>	IR	E12,E14	E12,E13,E14	0.0147175	1.98637	1.97165	1.63978e-07	6.95411e-06	0.405215	0.052993	-0.352222
uc009pgp.1,uc009pgq.1,uc009pgr.1,uc012gsj.1:chr9:+:45714651:45737805:Pcsk7:<1.2:	ALE	E2,E3	E2,E4,E5,E6,E7,E8,E9,E10,E11,E12,E13,E14	-0.790799	-2.96088	-2.17008	1.66375e-07	7.01699e-06	0.736394	0.200713	-0.535681
uc009dsr.2,uc009dss.2:chr6:-:124908428:124915547:Cops7a:3-4-5-6-7-8:	ALE	E8,E10	E8,E9	-1.86377	-3.68157	-1.8178	1.85085e-07	7.72126e-06	0.25804	0.0532718	-0.204769
uc008dej.1,uc008dek.1,uc008del.1,uc008dem.1:chr17:+:57388873:57402846:Trip10:4-5-6-7-8-9:11-12-13	ES	E9,E10,E11	E9,E11	-1.01683	0.796547	1.81338	1.91008e-07	7.88268e-06	0.161578	0.548299	0.386722
uc008kvq.2,uc008kvr.2:chr2:+:91105271:91117528:Arfgap2:<1-2-3-4-5-6-7:9-10-11-12-13-14>	ES	E7,E9	E7,E8,E9	1.9121	-0.0467984	-1.95889	1.90186e-07	7.88268e-06	0.0853736	0.452991	0.367618
uc008oxm.1,uc008oxo.1,uc008oxp.1:chr3:-:33956679:33980248:Dnajc19:<1-2-3-4-5:	ALE	E5,E7,E8	E5,E9	0.587738	3.35743	2.76969	2.10313e-07	8.63297e-06	0.805153	0.977427	0.172275
uc007gct.1,uc007gcu.1:chr10:+:79792914:79799186:Reep6:<1-2-3-4:6>	ES	E4,E6	E4,E5,E6	2.05273	0.162687	-1.89004	2.18211e-07	8.90952e-06	0.0692422	0.402765	0.333522
uc007mnd.2,uc007mne.2,uc007mnf.2,uc007mng.2:chr11:+:117060974:117223639:Sept9::7-8-9-10-11-12-13-14-15>	AFE	E4,E7	E6,E7	-0.730467	2.02899	2.75946	2.25351e-07	9.15218e-06	0.892975	0.333632	-0.559343
uc009tkb.1,uc009tkc.1,uc009tkd.1:chrX:+:68809096:68813829:Hmgb3:<1.2:4.5-6-7-8>	A5SS	E2,E4	E2,E3,E4	-2.1194	0.0861501	2.20555	2.26721e-07	9.15218e-06	0.815824	0.375308	-0.440516
uc007kjs.1,uc007kjt.1,uc007kju.1:chr11:+:78349937:78354975:Ift20:<1:3-4-5	ES	E1,E3	E1,E2,E3	0.567869	-0.828764	-1.39663	2.33786e-07	9.34655e-06	0.226607	0.531236	0.304628
uc008hfl.2,uc008hfm.1,uc008hfn.1:chr19:+:32670204:32741677:Papss2::3-4-5-6-7-8-10-11-12-13-14>	AFE	E1,E3	E2,E3	3.65964	0.6708	-2.98884	2.38756e-07	9.44687e-06	0.0134707	0.283764	0.270293
uc009fpm.1,uc009fpn.1:chr7:+:25184646:25207796:1500002O20Rik:<1-2-3-4-5-6:	ALE	E6,E7	E6,E8,E9,E10,E11,E12,E13,E14,E15	-1.82145	-4.55171	-2.73026	2.38147e-07	9.44687e-06	0.259381	0.0135548	-0.245826
uc008cjt.1,uc008cju.1,uc008cjv.1,uc008cjw.1,uc008cjx.2,uc012asi.1,uc012asj.1:chr17:-:36175353:36258355:H2-T10,H2-T22,H2-T9:<12.13:15-16.17-18-19	IR	E13,E15	E13,E14,E15	1.94236	0.652319	-1.29004	2.47323e-07	9.73565e-06	0.0922211	0.261253	0.169032
uc007idr.2,uc007ids.2,uc007idt.2:chr11:-:21221144:21271204:Ugp2::4-5-6-7-8-9-10-11-12>	AFE	E1,E4	E2,E4	3.09844	-0.658012	-3.75645	2.51208e-07	9.83814e-06	0.00228871	0.311261	0.308973
uc008sry.2,uc008srz.2,uc008ssa.2,uc012ddi.1:chr4:+:44769430:44945086:Zcchc7::11-12-13>	AFE	E10,E11	E4,E5,E6,E7,E8,E11	-2.54516	0.0436328	2.5888	2.65602e-07	1.03491e-05	0.941794	0.635652	-0.306142
uc007bbs.2,uc007bbt.2,uc007bbu.2,uc011wlk.1:chr1:-:58468831:58480932:Clk1:<1-2-3:5	IR	E3,E5	E3,E4,E5	-3.32214	-0.93438	2.38776	2.90309e-07	1.12546e-05	0.896906	0.353676	-0.54323
uc008ngo.2,uc008ngp.2,uc008ngq.2,uc008ngr.2,uc012cgj.1,uc012cgk.1:chr2:+:152673699:152721057:Tpx2:<1:3-5.6-8>	A5SS	E1,E3	E1,E2,E3	-1.41808	2.02277	3.44086	3.19595e-07	1.22574e-05	0.723576	0.0792863	-0.644289
uc009dle.2,uc009dlf.2,uc009dlg.2,uc012eqx.1,uc012eqy.1,uc012eqz.1,uc012era.1:chr6:+:117850357:117875640:Hnrnpf:<2:7-8-9>	A5SS	E2,E7	E2,E3,E7	-2.32682	-0.379834	1.94699	3.20967e-07	1.22574e-05	0.770547	0.354813	-0.415734
uc009gfa.1,uc009gfb.1,uc009gfc.1,uc009gfd.1,uc012fhs.1:chr7:+:31348358:31352981:Tmem149,U2af1l4,U2af26:4-5-6-7-9-10-11.12:14-15-16.17-18>	IR	E12,E14	E12,E13,E14	-0.992181	-3.83646	-2.84428	3.19114e-07	1.22574e-05	0.437598	0.947957	0.510359
uc008mpg.2,uc008mph.2,uc008mpi.2,uc008mpj.2,uc008mpk.2,uc008mpl.2,uc008mpm.1:chr2:-:139659215:139892521:Tasp1:11:	ALE	E11,E12	E11,E13,E14,E15,E16,E17,E18,E19	-3.28067	-0.0434413	3.23723	3.48611e-07	1.32472e-05	0.0399155	0.564311	0.524395
uc007vep.1,uc007veq.1,uc007ver.1,uc007ves.1,uc007vet.1,uc007veu.1,uc007vev.1:chr15:-:8241224:8415285:Nipbl:53:	ALE	E53,E54	E53,E55	-3.17805	0.593064	3.77112	3.54878e-07	1.34189e-05	0.125941	0.844296	0.718355
uc009fmg.1,uc009fmh.1:chr7:-:20116315:20147747:Lrrc68:<1-2-3-4-5-6-7-8-9.10:12-13-14-15>	IR	E10,E12	E10,E11,E12	1.31033	3.00883	1.69851	3.71452e-07	1.39768e-05	0.152257	0.0295578	-0.122699
uc007yll.2,uc007ylm.2,uc007yln.2,uc007ylo.2,uc007ylp.2,uc007ylq.1:chr16:+:17619446:17644923:Smpd4,mKIAA1418::8.9-11-12-13-14	AFE	E6,E8	E7,E8	-20	0.767255	20.7673	3.8614e-07	1.43884e-05	1	0.0684412	-0.931559
uc009trg.1,uc009trh.2,uc009tri.2,uc009trj.1,uc009trl.1,uc009trm.1,uc009trn.1,uc009tro.1,uc009trp.2,uc009trq.1,uc009trr.2,uc012hll.1:chrX:+:80060248:82450389:Dmd,dystrophin::70-71-72-73-74-75-77-78-80-81-82-83-84-85-86	AFE	E65,E66,E67,E70	E69,E70	-2.06264	0.913715	2.97635	3.85207e-07	1.43884e-05	0.0500288	0.55768	0.507651
uc008jzn.2,uc008jzo.2,uc008jzp.2,uc008jzq.1,uc008jzr.1,uc008jzs.2:chr2:+:70499565:70529782:Gorasp2:<1:4-5-6-7-8-9-11-12-14>	ES	E1,E4	E1,E2,E4	2.7488	0.181276	-2.56753	3.96608e-07	1.47071e-05	0.0247531	0.269484	0.244731
uc009ker.2,uc009kes.2,uc012fvm.1:chr7:-:144385353:144506128:Ebf3:15:17-18>	A3SS	E15,E17	E15,E16	0.568	-0.659946	-1.22795	4.03961e-07	1.49077e-05	0.2888	0.56582	0.27702
uc008pjb.1,uc008pjc.1,uc008pjd.1,uc008pje.1,uc008pjf.1,uc008pjg.1,uc008pjh.1,uc012cqb.1:chr3:+:60277031:60433670:Mbnl1,mKIAA0428:8.9:12	ES	E11,E12	E9,E12	1.15368	-0.176481	-1.33016	4.09801e-07	1.50509e-05	0.735593	0.421548	-0.314045
uc008vnw.1,uc008vnx.1:chr4:-:140668929:140695711:D4Ertd22e:<1:3-4>	ES	E1,E3	E1,E2,E3	1.0434	-0.0524678	-1.09587	4.20303e-07	1.53631e-05	0.224479	0.465166	0.240687
uc008zmf.1,uc008zmg.1,uc008zmh.1,uc008zmi.1,uc008zmj.1,uc008zmk.1,uc008zml.1,uc008zmm.1,uc012edb.1:chr5:-:123237469:123271348:Anapc5:14:	ALE	E14,E15	E14,E16,E17,E18,E19,E20,E21,E22,E23,E24	-1.13654	-3.12263	-1.98609	4.34702e-07	1.58141e-05	0.695823	0.112109	-0.583714
uc007ihs.1,uc007iht.1,uc007ihu.1,uc011xss.1:chr11:-:29999394:30168175:AK137356,Spnb2::5-6.7-8-9-10-11-12-13-14-15-16-17-18-19-20-21-22-23-24-25-26-27-28-29-30-31-32-33-34-35	AFE	E1,E2,E5	E4,E5	0.442835	3.03069	2.58786	4.52323e-07	1.63775e-05	0.689846	0.97564	0.285794
uc008cqw.1,uc008cqx.1,uc008cqy.1:chr17:+:45700908:45704618:Slc35b2:<1-3-4:	ALE	E4,E5	E4,E6	-2.95293	-0.54601	2.40692	4.60929e-07	1.65925e-05	0.154722	0.668343	0.51362
uc008upa.1,uc008upb.1,uc008upc.1,uc008upd.1,uc008upe.1,uc008upf.1:chr4:+:122939620:122976076:Gm12612,Pabpc4:<3-4-5:7-8-9-10-11-13-14	A5SS	E5,E7	E5,E6,E7	-0.551667	1.16699	1.71866	4.62583e-07	1.65925e-05	0.49906	0.128992	-0.370068
uc007jwq.2,uc007jwr.2,uc007jws.2,uc007jwt.2,uc007jwu.1,uc011xyb.1:chr11:+:70658264:70756607:Rabep1::21.22>	AFE	E13,E14,E15,E16,E17,E18,E19,E21	E20,E21	-1.09963	1.92279	3.02241	4.69357e-07	1.66795e-05	0.135307	0.766177	0.63087
uc008wsk.2,uc008wsl.2,uc008wsm.2,uc008wsn.2,uc012dtj.1:chr5:-:24368552:24606460:Prkag2::7	AFE	E1,E2,E3,E5,E7	E6,E7	1.08004	3.39171	2.31167	4.6902e-07	1.66795e-05	0.245991	0.872969	0.626978
uc007nqw.1,uc007nqx.1,uc007nqy.1,uc007nqz.1,uc007nra.1:chr12:+:66137320:66164373:Prpf39:<1-2-4:7-8-9-10-11	ES	E4,E7	E4,E5,E6,E7	-3.85483	-0.370204	3.48462	4.98215e-07	1.76235e-05	0.978039	0.47599	-0.50205
uc007mmn.2,uc007mmo.2:chr11:-:116711210:116714408:Srsf2:4:6.7>	IR	E4,E6	E4,E5,E6	0.417755	-1.24951	-1.66727	5.077e-07	1.7795e-05	0.182002	0.53683	0.354827
uc009pgb.2,uc012gse.1,uc012gsf.1,uc012gsg.1:chr9:-:45575028:45636721:Cep164,mKIAA1052:<5-6.7-8-9-10-11-12:16-17-18-19-20-21-22-23-24-25.26-27-28-29-30-31-32-33-34>	ES	E12,E16	E12,E13,E16	-0.87855	0.729515	1.60807	5.05869e-07	1.7795e-05	0.608109	0.211043	-0.397066
uc008ylg.2,uc008ylh.2:chr5:+:106128987:106244234:Lrrc8d::3-4>	AFE	E1,E3	E2,E3	2.63496	-1.21303	-3.84799	5.12571e-07	1.78841e-05	0.0637564	0.825256	0.761499
uc008iir.1,uc008iis.1,uc008iit.1,uc008iiu.1,uc008iiv.1,uc008iiw.1,uc008iix.1,uc008iiy.1,uc008iiz.1,uc008ija.1,uc008ijb.1,uc012bqt.1:chr2:+:11627162:11655589:IL15ra,Il15ra::3	AFE	E1,E3	E2,E3	0.503456	3.05646	2.553	5.31964e-07	1.84767e-05	0.223304	0.0197896	-0.203514
uc008job.1,uc008joc.1,uc008jod.1,uc008joe.1,uc012bux.1:chr2:-:38872022:38921005:Golga1:<4-5-6-7-8-9-10:13-14-15-16-17-18-19-20-21-22-23-24-25-26.27.28.29>	IR	E10,E13	E10,E11,E12,E13	-2.92817	0.352377	3.28055	5.60357e-07	1.92884e-05	0.929677	0.185206	-0.744471
uc008mhz.1,uc008mia.2,uc008mib.2,uc012cdw.1:chr2:+:129418574:129457964:Sirpa::3-4	AFE	E1,E3	E2,E3	0.807751	-0.882389	-1.69014	5.66284e-07	1.93191e-05	0.205326	0.610174	0.404849
uc008upa.1,uc008upb.1,uc008upc.1,uc008upd.1,uc008upe.1,uc008upf.1:chr4:+:122939620:122976076:Gm12612,Pabpc4:15:17-18-19-20>	ES	E15,E17	E15,E16	-1.40543	-0.174487	1.23094	6.60344e-07	2.2249e-05	0.759454	0.462069	-0.297385
uc008wvz.1,uc012due.1:chr5:+:31117128:31168479:Mapre3:<1-2-3:5-6-7-8>	IR	E3,E5	E3,E4,E5	-1.21255	0.732746	1.9453	6.63453e-07	2.2249e-05	0.48498	0.122238	-0.362742
uc009gpz.1,uc009gqa.1,uc009gqb.1,uc009gqc.1,uc009gqd.1,uc012fjr.1:chr7:-:51805002:51809318:Nr1h2:6-7:9	IR	E7,E9	E7,E8,E9	-1.13109	0.0137008	1.14479	6.6376e-07	2.2249e-05	0.603864	0.328472	-0.275392
uc007cvf.2,uc007cvg.2,uc007cvh.2,uc007cvi.2,uc007cvj.2,uc007cvk.2:chr1:-:139959437:140071882:Ptprc:5:8-10-11-12-13-14-15-16-17-18-19-20-21-22-23-24-25-26-27-28-29-30-31-32-33-34-35>	ES	E5,E8	E5,E7,E8	-0.0605736	-1.17297	-1.1124	6.99792e-07	2.33548e-05	0.405135	0.642753	0.237618
uc007ane.1,uc007anf.1,uc007ang.1:chr1:-:30859186:30930717:Phf3:<1:3	ES	E1,E3	E2,E3	2.50065	-2.45771	-4.95836	7.20595e-07	2.3945e-05	0.0448748	0.838819	0.793945
uc007csl.1,uc007csm.1,uc007csn.1,uc007cso.2:chr1:-:136655643:136852517:9530009M10Rik,Ppp1r12b::21-23-24-25-26	AFE	E1,E2,E3,E4,E5,E6,E7,E8,E9,E10,E11,E12,E13,E15,E16,E17,E18,E19,E21	E20,E21	-0.200266	1.67238	1.87264	7.50604e-07	2.45176e-05	0.138383	0.502288	0.363905
uc007hvf.1,uc007hvg.1,uc007hvi.1,uc007hvj.1,uc011xra.1:chr11:-:4665850:4749530:Nf2:10-11-12-13-14-15-16:20>	ES	E16,E20	E16,E19,E20	0.667308	-0.971225	-1.63853	7.47717e-07	2.45176e-05	0.306283	0.679423	0.373141
uc008gnd.1,uc008gne.1,uc008gnf.1:chr19:-:8883564:8893784:Ttc9c:<1.2:4-5-6>	IR	E2,E4	E2,E3,E4	0.356207	-0.677956	-1.03416	7.42562e-07	2.45176e-05	0.216601	0.4537	0.237099
uc009kju.2,uc009kjv.2,uc009kjw.2:chr7:-:148375832:148379903:Hras1:<1-2-3-4-6:8>	IR	E6,E8	E6,E7,E8	-0.775717	0.510188	1.2859	7.4866e-07	2.45176e-05	0.570828	0.259192	-0.311636
uc007khg.1,uc007khh.1,uc007khi.1,uc007khj.1,uc007khk.1,uc007khl.1,uc011xzx.1,uc011xzy.1:chr11:+:77590766:77679482:Myo18a:5-6-7-8-9-10-11-12:16-17-18-19-20-21-22-23-24-25-26-27-28-29-30-31-32-33-34-35-36-37-38-39-40-41-42-43	ES	E12,E16	E12,E14,E15,E16	-0.271851	1.28558	1.55743	7.70211e-07	2.50514e-05	0.550757	0.205273	-0.345484
uc009fnd.2,uc009fne.2:chr7:-:20301992:20334922:Pvrl2:<1-2-3-4-5:	ALE	E5,E6	E5,E7,E8,E9,E10	0.474386	-0.677996	-1.15238	8.09011e-07	2.62024e-05	0.781467	0.490224	-0.291243
uc007jrd.1,uc007jre.1,uc007jrg.2,uc007jrh.2,uc007jri.2:chr11:-:69496078:69509600:BC096441,Tnfsf12,Tnfsf13::11-12-13	AFE	E10,E11	E3,E4,E5,E6,E7,E8,E11	-0.475107	-1.71878	-1.24367	8.24627e-07	2.65447e-05	0.585414	0.826758	0.241344
uc008yfo.1,uc008yfp.1:chr5:+:97426707:97520067:Bmp2k:<4-5-6-7-8-9-10-11-12-13-14:	ALE	E14,E15	E14,E16,E17	-2.79321	-0.338975	2.45423	8.26496e-07	2.65447e-05	0.0959833	0.760243	0.664259
uc008rqy.1,uc008rqz.1:chr3:+:145812796:145858476:Mcoln2::3-4>	AFE	E1,E3	E2,E3	2.2039	-1.00084	-3.20474	8.53764e-07	2.73062e-05	0.122657	0.827901	0.705244
uc008dym.2,uc008dyn.2,uc008dyo.2,uc008dyp.2,uc008dyr.2,uc008dys.2,uc012ayz.1,uc012aza.1:chr18:+:4920537:5119291:Svil:11-13-14:16-17-18-19-20-21-22-23-24-25-26-27-28-29-30-31-32-33-34-35-38-39-40-41-42>	ES	E14,E16	E14,E15,E16	1.72426	-0.287567	-2.01183	9.0318e-07	2.87669e-05	0.128233	0.477893	0.34966
uc007hxq.2,uc007hxr.2,uc007hxs.2,uc007hxt.2,uc007hxu.1,uc007hxw.1:chr11:-:5869668:5965751:Camk2b:18-19:21	ES	E19,E21	E19,E20,E21	1.2803	-1.05694	-2.33724	9.20329e-07	2.91919e-05	0.251479	0.706433	0.454954
uc008rmg.1,uc008rmh.1,uc008rmi.1:chr3:+:136333733:136598743:Ppp3ca:<1-2-3-4-5-6-7-8-10-11-12-13:15>	ES	E13,E15	E13,E14,E15	3.14567	0.992119	-2.15356	9.28205e-07	2.93206e-05	0.0270994	0.234313	0.207213
uc007xne.1,uc007xnf.1,uc007xng.1:chr15:-:98475937:98493320:Ddx23:4-5-6-7:9	IR	E7,E9	E7,E8,E9	0.27301	2.09642	1.82341	9.48746e-07	2.98466e-05	0.287302	0.0348522	-0.25245
uc007kkf.1,uc007kkg.1:chr11:-:78828302:78959856:Ksr1:<8-9-10-11-12-13-14-15-16-17-18-19-20:22>	ES	E20,E22	E20,E21,E22	2.12494	0.0211713	-2.10377	9.58649e-07	3.00351e-05	0.0875545	0.43091	0.343356
uc009str.1,uc009sts.2,uc009stt.2,uc009stu.2,uc009stv.1:chrX:+:20374939:20437647:Araf:12:14	IR	E12,E14	E12,E13,E14	1.33136	2.34252	1.01115	1.00099e-06	3.12343e-05	0.162475	0.0616593	-0.100816
uc007iok.2,uc007iol.2,uc009vaf.1,uc009vag.1:chr11:+:46250448:46256223:Med7:<2:4	A5SS	E2,E4	E3,E4	-3.51167	0.37728	3.88895	1.08361e-06	3.36752e-05	0.969386	0.358871	-0.610515
uc009edo.1,uc009edp.1,uc009edq.1,uc012etc.1:chr6:-:128359461:128374928:Itfg2:15.16:18>	IR	E16,E18	E16,E17,E18	0.618475	2.16597	1.5475	1.08807e-06	3.36777e-05	0.299378	0.0787319	-0.220646
uc009fll.2,uc009flm.2:chr7:+:19930419:19941873:Ercc1:<1-2-3-4-5-6-7:	ALE	E7,E8	E7,E9,E10,E11	-2.90351	-0.865353	2.03816	1.13107e-06	3.47519e-05	0.0288087	0.199499	0.17069
uc007lzp.1,uc007lzq.1,uc007lzr.1,uc007lzs.1:chr11:-:106641669:106650179:Ddx5:<2.3-4-5-6-7-8-9-10-11-12-14:	ALE	E14,E15	E14,E16,E17	-0.827624	-2.31684	-1.48922	1.17739e-06	3.58635e-05	0.61838	0.296953	-0.321427
uc007jse.1,uc007jsf.1,uc007jsg.1,uc007jsh.1,uc007jsi.1:chr11:-:69695068:69709041:Acap1,BC064116,Centb1,mKIAA0050:19-21-22-23-24-25-26:28>	IR	E26,E28	E26,E27,E28	1.17561	-0.258607	-1.43422	1.19385e-06	3.62215e-05	0.124439	0.359048	0.234609
uc009mek.2,uc009mel.2,uc009mem.2,uc009men.1,uc009mep.2,uc009meq.2:chr8:+:74200281:74214476:Insl3,Jak3:<1-2-3-4-5-7:	ALE	E7,E11,E12	E7,E8,E9	0.271643	2.60842	2.33677	1.22982e-06	3.71656e-05	0.401914	0.0853798	-0.316534
uc008ubo.1,uc008ubp.1,uc008ubq.1,uc008ubr.1:chr4:-:108486899:108506853:Btf3l4:<2.3:5-6-7-9-10>	A5SS	E3,E5	E3,E4,E5	0.303668	2.92772	2.62405	1.24254e-06	3.74029e-05	0.285152	0.0169298	-0.268222
uc007pzs.2,uc007pzt.2,uc011yyb.1:chr13:+:32893898:32914479:WHIP,Wrnip1:8:	ALE	E8,E10	E8,E9	5.68526	2.22221	-3.46305	1.28309e-06	3.83444e-05	0.997381	0.910133	-0.0872476
uc008qbf.1,uc008qbg.1,uc008qbh.1,uc008qbi.1,uc008qbj.1:chr3:+:89876615:89904526:Tpm3:4-5-6:10-11	ME	E6,E8,E10	E6,E9,E10	2.06787	0.122393	-1.94548	1.28381e-06	3.83444e-05	0.888338	0.497027	-0.391311
uc009lud.1,uc009lue.1,uc009luf.1,uc009lug.1,uc009luh.1,uc009lui.1:chr8:-:63992040:64381487:Palld::14.15-16-17	AFE	E13,E14	E4,E5,E6,E7,E8,E9,E10,E11,E14	1.17993	-1.70723	-2.88716	1.31287e-06	3.90605e-05	0.02074	0.358603	0.337863
uc007cng.2,uc007cni.1,uc007cnj.1,uc011wrp.1,uc011wrq.1:chr1:-:133181827:133423938:Srgap2:<1-2-3-4-5-7-8-9-10-11-12-13-15-18-19-20-21-22-23-24-25.26:	ALE	E26,E27	E26,E32,E33,E34	-0.226781	-1.87702	-1.65024	1.33138e-06	3.94583e-05	0.876328	0.557764	-0.318564
uc008tfd.1,uc008tfe.1,uc008tfg.1,uc008tfh.2,uc008tfi.2,uc008tfj.1,uc008tfk.2,uc008tfl.2,uc012dfu.1,uc012dfv.1:chr4:+:62220880:62364053:Rgs3::18-19-20-21	AFE	E12,E13,E14,E15,E16,E18	E17,E18	0.795765	2.88298	2.08722	1.36144e-06	3.99975e-05	0.168704	0.628256	0.459553
uc008wmw.2,uc008wmx.2,uc008wmy.2,uc008wmz.2,uc008wna.2,uc008wnb.2,uc008wnc.1:chr5:+:15440508:15880329:Cacna2d1:<1-2-3-5-6-7-8-9-10-11:	ALE	E11,E12	E11,E13,E14,E15,E16,E17,E18,E19,E20,E21,E22,E23,E24,E25,E26,E28,E29,E30,E31,E32,E33,E34,E35,E36,E37,E38,E39,E40,E41,E42,E43	1.09861	-2.84491	-3.94352	1.36521e-06	3.99975e-05	0.647805	0.237894	-0.409912
uc007uvl.1,uc007uvn.2,uc007uvo.2,uc007uvp.2,uc007uvq.2,uc007uvr.2,uc011zph.1:chr14:-:101841576:102008408:Tbc1d4:<1-2-3-4-5-6-7.8-9-10-11:14	ES	E11,E14	E11,E12,E14	3.5388	0.87211	-2.66669	1.37044e-06	3.99981e-05	0.0150877	0.189617	0.174529
uc009bfz.1,uc009bga.1,uc012ejs.1:chr6:+:31170430:31287394:AK008857,BC021953,BC099512:<1:3	ES	E1,E3	E1,E2,E3	1.88149	0.362401	-1.51909	1.43013e-06	4.14251e-05	0.0620986	0.254419	0.192321
uc009tgm.1,uc009tgn.1,uc009tgo.1,uc012hhw.1:chrX:+:53984963:54046523:Fhl1::5-6	AFE	E1,E3,E5	E4,E5	1.50112	-1.86636	-3.36747	1.42555e-06	4.14251e-05	0.740268	0.0447424	-0.695526
uc009qri.1,uc009qrj.2,uc009qrk.2,uc009qrl.2,uc009qrm.2,uc012gww.1:chr9:+:74800690:74880275:BC031353::9-10-11-12-13-14-15-16-17	AFE	E6,E9	E8,E9	-1.60507	0.176911	1.78198	1.52379e-06	4.39723e-05	0.779833	0.373986	-0.405847
uc009csr.1,uc009css.1,uc009cst.1,uc009csu.1:chr6:+:86799510:86953221:Aak1:<1.2:4-5-6-7-8-9-10-11-12-14-15	IR	E2,E4	E2,E3,E4	1.21948	-0.969819	-2.1893	1.55323e-06	4.4654e-05	0.144856	0.713654	0.568798
uc008qyi.1,uc008qyj.1,uc008qyk.1,uc012cwc.1:chr3:-:107998688:108003752:Cyb561d1::5-6>	AFE	E1,E2,E5	E3,E4,E5	1.40086	-0.545242	-1.9461	1.58294e-06	4.53383e-05	0.166822	0.550427	0.383606
uc008qqo.2,uc008qqp.2:chr3:-:99942102:99966326:Wdr3:<1-2-3.4-5-6-7-8-9-10-11-12-13-14-15-16-17-18-20-22:24-26-28.29-30-31-32-33-34>	IR	E22,E24	E22,E23,E24	0.280141	2.70336	2.42322	1.66893e-06	4.76235e-05	0.314765	0.0262494	-0.288516
uc009evu.2,uc009evv.2,uc009evw.2,uc009evx.1,uc009evy.2:chr7:+:3645211:3652637:Tsen34::3-4-5-7.8>	AFE	E1,E3	E2,E3	-0.906557	1.22656	2.13312	1.7439e-06	4.95786e-05	0.886874	0.356193	-0.530681
uc008cup.2,uc012aus.1,uc012aut.1,uc012auu.1:chr17:-:47065239:47147481:Ubr2::13	AFE	E12,E13	E1,E2,E3,E4,E6,E7,E8,E9,E10,E11,E13	-0.00852995	-1.88089	-1.87236	1.802e-06	5.10411e-05	0.34728	0.792619	0.445339
uc008yzf.1,uc008yzg.1,uc008yzh.1:chr5:+:114580443:114589330:Ung::5-6-7-8-9>	AFE	E2,E3,E5	E4,E5	3.30851	0.420117	-2.88839	1.8602e-06	5.2496e-05	0.97083	0.50877	-0.462059
uc008seo.2,uc008sep.2,uc008seq.2:chr4:+:32051081:32110441:Map3k7:<1-2-3-4-5-6-8-9-10-11-12:14-15-16-17-18>	ES	E12,E14	E12,E13,E14	0.217152	-0.925715	-1.14287	1.88045e-06	5.28731e-05	0.376912	0.662993	0.286081
uc008xok.2,uc008xol.2,uc008xom.2,uc008xon.2,uc008xoo.2,uc008xop.2:chr5:-:66407795:66543163:Rbm47::5-7-8	AFE	E2,E5	E3,E5	1.99364	-0.276348	-2.26999	1.96623e-06	5.50831e-05	0.0474002	0.316615	0.269215
uc008jaw.1,uc008jax.1,uc008jay.1:chr2:+:29917562:29927314:Set::3-4.5-6-7-8.9-10-11>	AFE	E1,E3	E2,E3	2.47833	-0.500978	-2.97931	2.00311e-06	5.59122e-05	0.0602408	0.701955	0.641714
uc008bpv.1,uc008bpw.1,uc008bpx.1,uc008bpy.1,uc008bpz.1:chr17:+:28046284:28199581:Anks1:13-14-15-16-17-18-19-20-21-22-23-24:26	ES	E24,E26	E24,E25,E26	2.08446	0.788461	-1.296	2.10095e-06	5.78062e-05	0.0775118	0.225828	0.148317
uc008dcj.2,uc008dck.2,uc012avv.1:chr17:+:56724404:56745717:Safb:<1-2-3-4-5-8:10	IR	E8,E10	E8,E9,E10	-0.706655	1.73837	2.44502	2.08037e-06	5.78062e-05	0.354282	0.0293531	-0.324929
uc008wwk.1,uc012dug.1:chr5:-:31208890:31210161:Ost4:<1.2:4-5>	IR	E2,E4	E2,E3,E4	0.765226	1.6988	0.933574	2.10109e-06	5.78062e-05	0.221693	0.102008	-0.119685
uc009igp.1,uc009igq.1,uc009igr.1,uc009igs.1,uc009igt.1,uc009igu.1,uc009igv.1,uc009igw.1:chr7:+:97278741:97357442:Picalm,mKIAA4114:<1-2-4-6-7-8-9-10-11-12-13-14:16	ES	E14,E16	E14,E15,E16	1.68561	0.52987	-1.15574	2.08916e-06	5.78062e-05	0.0990858	0.246679	0.147593
uc007rie.2,uc007rif.1,uc007rih.2,uc007rii.2,uc007rij.2,uc007rik.2:chr13:+:83643032:83806684:Mef2c:6-7:10-12-13-15-16	ME	E7,E8,E10	E7,E9,E10	2.5809	0.566464	-2.01443	2.14331e-06	5.87573e-05	0.925216	0.650569	-0.274647
uc007zxy.1,uc007zxz.1,uc007zya.1,uc007zyb.2,uc012aii.1:chr16:+:91648068:91679437:Son,mKIAA1019:<1-2-3-4:	ALE	E4,E5	E4,E6,E7	-0.0497555	-1.90533	-1.85557	2.15238e-06	5.8796e-05	0.251782	0.0529867	-0.198795
uc009kfm.1,uc009kfn.2:chr7:+:146398886:146428872:Lrrc27:<3-4-5-6-7-8-9.10:	ALE	E10,E11	E10,E12,E13,E14,E15	-0.593507	-3.93203	-3.33853	2.172e-06	5.91215e-05	0.565334	0.0324519	-0.532882
uc007jzk.2,uc007jzl.2,uc007jzm.2,uc007jzn.2:chr11:+:72609727:72740622:Zzef1::49-50-51.52-53.54-55-56-57-58-59>	AFE	E42,E43,E44,E45,E46,E47,E49	E48,E49	0.902216	3.65762	2.7554	2.21787e-06	6.01566e-05	0.607303	0.972497	0.365194
uc008clq.1,uc008clr.1:chr17:+:37095536:37102568:Znrd1as:<1.2:4-5>	A5SS	E2,E4	E2,E3,E4	-0.408255	2.38595	2.7942	2.24067e-06	6.02482e-05	0.652319	0.0603533	-0.591966
uc008xer.2,uc008xes.2,uc008xet.1,uc008xeu.2,uc008xev.1,uc008xew.2,uc008xex.1:chr5:-:36833252:36928875:Tbc1d14,kiaa1322::12-13-14-15-16-17-18-19-20.21-23-24>	AFE	E11,E12	E7,E9,E12	1.44614	-1.06611	-2.51225	2.24479e-06	6.02482e-05	0.0821765	0.429101	0.346924
uc007jem.2,uc007jen.2,uc007jeo.2,uc007jep.2,uc007jer.2,uc007jes.2,uc007jet.2,uc011xvo.1:chr11:+:59475996:59594362:Mprip:<1-2-3-4-5-6.7-8:10-11-12-14.15-16-17-18-19	A5SS	E8,E10	E8,E9,E10	-1.85536	0.159072	2.01443	2.26015e-06	6.04492e-05	0.727153	0.254442	-0.472711
uc007nyb.1,uc007nyc.2,uc011ynz.1:chr12:-:77449886:77470547:Zbtb25:<1.2:6.7>	ES	E2,E6	E2,E5,E6	-0.320201	-20	-19.6798	2.28451e-06	6.04693e-05	0.488426	1	0.511574
uc007obm.1,uc007obn.1,uc007obo.1,uc007obp.1,uc007obq.1:chr12:+:82046490:82051494:Srsf5:2:4-6-7-8-9-10	A5SS	E2,E4	E2,E3,E4	0.0153663	1.45566	1.44029	2.27701e-06	6.04693e-05	0.388302	0.104665	-0.283637
uc009epm.1,uc009epn.1,uc009epo.1,uc009epp.1,uc009epr.1:chr6:-:142536381:142650794:Abcc9:<1-2-3-4-5-7-8-9-10-11-12-13-14-15-16-17-18-19:21-22-23-24-25-26-27-28-29-30-31-32-33-34-35-36-37-38-39-40	ES	E19,E21	E19,E20,E21	-20	-0.29973	19.7003	2.28453e-06	6.04693e-05	1	0.533962	-0.466038
uc008zpa.2,uc008zpb.2,uc008zpc.2,uc008zpd.1,uc008zpe.1:chr5:-:124568698:124666426:BC115953,Pitpnm2:20:24-25-26-27-28-29-30-31>	ES	E20,E24	E20,E22,E24	-0.777878	-2.52751	-1.74963	2.30431e-06	6.0783e-05	0.576737	0.885886	0.309149
uc008ygx.1,uc008ygy.1,uc008ygz.1:chr5:-:100462597:100468241:Hnrpdl:<1-2-3-4-5-6-7:11.12>	ES	E7,E11	E7,E9,E11	-2.67885	-0.560461	2.11839	2.3223e-06	6.08396e-05	0.853384	0.389607	-0.463777
uc009lxe.1,uc009lxf.1:chr8:-:71897096:71919427:AK034302,AK162599:<1:	ALE	E1,E2	E1,E3,E4,E5	3.49025	-0.749125	-4.23938	2.31492e-06	6.08396e-05	0.854999	0.0920865	-0.762912
uc009sny.2,uc009snz.2,uc009soa.2,uc009sob.2,uc009soc.2,uc009sod.2:chrX:-:7716100:7722928:Rbm3:9.10:	ALE	E10,E11	E10,E12	-0.256623	4.40902	4.66564	2.36665e-06	6.17905e-05	0.796362	0.995803	0.199441
uc009rtg.1,uc009rth.1,uc009rti.1,uc009rtj.1,uc009rtk.1,uc009rtl.1:chr9:-:109986823:110019918:Dhx30,HELG:3:	ALE	E3,E4	E3,E5	1.26369	-1.43508	-2.69878	2.48064e-06	6.45471e-05	0.52229	0.0779591	-0.444331
uc009txz.1,uc009tya.1,uc009tyb.1,uc009tyc.2,uc009tyd.2:chrX:+:98835400:98879690:Ogt:6-7-8:	ALE	E8,E11,E12,E13,E14,E15,E16,E17,E18,E19,E20,E21,E22,E23,E24,E25,E26,E27,E28	E8,E9	0.859934	2.31621	1.45627	2.53629e-06	6.57723e-05	0.271872	0.608994	0.337122
uc008eyn.2,uc008eyo.2:chr18:-:56685389:56732593:Aldh7a1::4-5-6-7-8-9-10-11-12-13-14-15-16-17-18-19-20-21>	AFE	E1,E2,E4	E3,E4	-0.559731	0.945113	1.50484	2.62852e-06	6.79345e-05	0.155747	0.466198	0.310451
uc007slb.1,uc007slc.1,uc007sld.1,uc007sle.1:chr14:+:21871854:22267768:Adk::4-5-6-7-8-9-11-12-13-14>	AFE	E1,E4	E3,E4	-2.64194	0.829543	3.47148	2.69699e-06	6.92377e-05	0.870251	0.156881	-0.71337
uc007mks.2,uc007mkt.2,uc007mku.2:chr11:-:116149311:116168052:Exoc7:8:10-11-12-13-14	IR	E8,E10	E8,E9,E10	-0.930635	0.684007	1.61464	2.71922e-06	6.95757e-05	0.274384	0.056618	-0.217766
uc008cds.1,uc008cdt.1,uc008cdu.1,uc012aqp.1:chr17:-:34976170:34987149:Skiv2l:13-14:16-17	IR	E14,E16	E14,E15,E16	1.11421	2.67203	1.55782	2.75933e-06	7.03676e-05	0.178456	0.0454404	-0.133015
uc008avs.1,uc008avt.1,uc008avu.1:chr17:+:24551619:24562842:Rnps1:<1:3	ES	E1,E3	E2,E3	-4.41738	-0.565204	3.85218	2.78218e-06	7.04819e-05	0.970651	0.522117	-0.448534
uc009gif.1,uc009gig.1:chr7:-:31915145:31936069:Gramd1a:<1-2-3-4-5-6-7-8-9-10-11-12-13:15-16-17-18-19-20>	A5SS	E13,E15	E13,E14,E15	-1.19449	0.313257	1.50775	2.77378e-06	7.04819e-05	0.71734	0.355119	-0.36222
uc007wkt.1,uc007wku.1:chr15:+:76369372:76372560:Gpr172b:<1-2-3:5	IR	E3,E5	E3,E4,E5	1.17384	2.76475	1.59091	2.81615e-06	7.11077e-05	0.182906	0.0391245	-0.143781
uc009ndh.1,uc009ndi.1,uc009ndk.1,uc009ndl.1:chr8:-:108090597:108161374:AK080383,AK086852,Agrp:<1.2:4>	A5SS	E2,E4	E2,E3,E4	-2.53576	0.0566892	2.59245	2.83299e-06	7.12983e-05	0.864401	0.346609	-0.517792
uc007jvh.1,uc007jvi.1,uc007jvj.1,uc007jvk.1,uc007jvl.1,uc007jvm.1,uc007jvn.1:chr11:+:70376382:70427984:Mink1::17-18-19.20-21	AFE	E1,E2,E3,E4,E5,E6,E7,E8,E9,E10,E11,E12,E13,E14,E17	E16,E17	0.914999	2.72616	1.81116	2.88732e-06	7.24284e-05	0.34115	0.791502	0.450352
uc009oki.2,uc009okj.2,uc009okk.1,uc009okl.2,uc009okm.2:chr9:+:20970157:21017692:Pde4a::4	AFE	E2,E4	E3,E4	0.417429	-1.80548	-2.22291	2.97825e-06	7.44659e-05	0.251896	0.742488	0.490592
uc009hxz.1,uc009hya.1,uc009hyb.1:chr7:-:86278653:86293946:Mfge8:<1-2-3:	ALE	E3,E5	E3,E7,E8,E9,E10,E11,E12	-3.57892	-1.69662	1.8823	3.07309e-06	7.65879e-05	0.256142	0.690007	0.433865
uc008xpo.1,uc008xpp.1,uc008xpq.1,uc008xpr.1,uc008xps.1:chr5:+:67651890:67682700:Tmem33::3-4-5-7-8	AFE	E1,E3	E2,E3	2.73006	1.53476	-1.19531	3.1712e-06	7.87771e-05	0.0813206	0.218896	0.137576
uc008clg.1,uc008clh.1:chr17:+:36974085:36996325:Trim26:8:	ALE	E8,E10,E11,E12,E13	E8,E9	1.11406	2.83482	1.72076	3.2409e-06	8.0249e-05	0.496897	0.870194	0.373297
uc007jrd.1,uc007jre.1,uc007jrg.2,uc007jrh.2,uc007jri.2:chr11:-:69496078:69509600:BC096441,Tnfsf12,Tnfsf13:3-4-5-6-7-8:	ALE	E8,E11,E12,E13	E8,E9	-0.0746442	-1.05687	-0.982222	3.28068e-06	8.09727e-05	0.74371	0.526466	-0.217244
uc007nkr.1,uc007nks.1,uc007nkt.1:chr12:-:40732033:40764574:Arl4a::3.4>	AFE	E1,E3	E2,E3	0.617018	-1.30228	-1.9193	3.2972e-06	8.11195e-05	0.411777	0.816162	0.404384
uc008ycw.1,uc008ycx.1,uc008ycy.2,uc008ydc.1,uc008ydd.2,uc008yde.1,uc008ydg.2,uc008ydh.2,uc008ydi.2,uc008ydj.2,uc012dyq.1:chr5:+:92760866:92843653:Art3,art3::13-14	AFE	E12,E13	E6,E7,E8,E9,E11,E13	-0.784291	-2.54894	-1.76465	3.31907e-06	8.13967e-05	0.0922877	0.367732	0.275444
uc008ycw.1,uc008ycx.1,uc008ycy.2,uc008ydc.1,uc008ydd.2,uc008yde.1,uc008ydg.2,uc008ydh.2,uc008ydi.2,uc008ydj.2,uc012dyq.1:chr5:+:92760866:92843653:Art3,art3:13-14:17>	ES	E14,E17	E14,E15,E17	3.70213	1.23154	-2.47059	3.47909e-06	8.50493e-05	0.0158988	0.190773	0.174874
uc007sxq.1,uc007sxr.1,uc007sxs.1:chr14:-:32291983:32308163:Mettl6:5:	ALE	E5,E6	E5,E7	0.646627	-1.65823	-2.30486	3.54171e-06	8.63053e-05	0.689647	0.103532	-0.586115
uc009pdy.2,uc009pdz.2,uc012grw.1,uc012grx.1:chr9:+:44412974:44448814:Ddx6:2:4-5-6-7-8-9-10-11-12-13-15-16-17>	A5SS	E2,E4	E2,E3,E4	-1.5635	1.38471	2.94821	3.56226e-06	8.65313e-05	0.783208	0.203565	-0.579643
uc009ros.2,uc009rot.2,uc009rou.2:chr9:-:107987744:107996811:Apeh:<1-2-3-4-5-6:8-9-10-11-12-13-14-15-16-17-18.19-20-21-22-23-24>	IR	E6,E8	E6,E7,E8	0.766939	2.98416	2.21722	3.67986e-06	8.91059e-05	0.226652	0.0236755	-0.202977
uc008xaa.1,uc008xab.1,uc008xac.2,uc008xad.2,uc008xae.2,uc008xaf.2:chr5:+:33206369:33336882:Depdc5:3-4-5-6-7-8-9-11-12-13-14-15-16-17-18-19-21-22-23-24-25-26-27-28-30-31-32-33-34-35-36:39-40-41-42-43-44-45-46-47-48>	ES	E36,E39	E36,E38,E39	2.93636	0.748454	-2.18791	3.71873e-06	8.96254e-05	0.0383805	0.281806	0.243425
uc007ztj.1,uc007ztk.1,uc007ztl.1,uc012ahm.1:chr16:+:84835169:84864023:Gabpa::3-4-5-6-7-8-9-10-11	AFE	E1,E3	E2,E3	-3.0129	0.39323	3.40613	3.88778e-06	9.32582e-05	0.93917	0.165842	-0.773328
uc007kvg.2,uc007kvh.2,uc011ycf.1,uc011ycg.1:chr11:+:87912647:88007642:Cuedc1::3-4-5-6-7	AFE	E1,E3	E2,E3	3.36153	0.081678	-3.27985	3.906e-06	9.34033e-05	0.0420397	0.547077	0.505037
uc007bnp.1,uc007bnq.1,uc007bnr.1,uc007bns.1:chr1:-:75131788:75139271:1810031K17Rik::5-6-7-8-9-10-11-12>	AFE	E3,E5	E4,E5	-2.43848	-0.577317	1.86116	3.98567e-06	9.50125e-05	0.986256	0.915835	-0.0704212
uc009kjs.2,uc009kjt.2,uc012fwp.1:chr7:-:148346224:148358750:Rnh1::5-6-7-8-9-10-11-12-13>	AFE	E1,E5	E2,E3,E5	-0.091287	1.36881	1.4601	4.05198e-06	9.62941e-05	0.31177	0.0860805	-0.22569
uc008ojh.1,uc008oji.1:chr2:+:180316008:180320339:1600027N09Rik:<2-3-4:6-7>	A3SS	E4,E6	E4,E5,E6	-1.80967	-0.236881	1.57279	4.08375e-06	9.67496e-05	0.814358	0.469432	-0.344927
uc007det.1,uc007deu.1,uc007dev.1,uc007dew.1,uc007dex.1,uc011wun.1:chr1:+:162965296:162968668:Gas5:11:13	IR	E11,E13	E11,E12,E13	1.58841	0.122816	-1.4656	4.22843e-06	9.98689e-05	0.0858844	0.283506	0.197622
uc008mkk.2,uc008mkl.2,uc008mkm.2,uc008mkn.2:chr2:-:130876552:130889550:Adam33,mADAM33-alpha:15:17-18-19-20-21-22-23>	IR	E15,E17	E15,E16,E17	0.379618	-1.13993	-1.51954	4.37517e-06	0.000103018	0.313743	0.649059	0.335316
uc007mzu.2,uc007mzv.2,uc007mzw.2,uc007mzx.2,uc007mzy.2,uc007mzz.2,uc007naa.2:chr12:+:8680939:8759389:Pum2:13-14-15-16-17:19-20-21	ES	E17,E19	E17,E18,E19	0.149783	-1.318	-1.46778	4.39977e-06	0.00010328	0.286199	0.649009	0.36281
uc007hnv.2,uc007hnw.1,uc007hnx.2:chr10:-:128114238:128133324:Rab5b:<1.2:4-5-6	A5SS	E2,E4	E2,E3,E4	-0.0264879	1.23881	1.2653	4.59426e-06	0.000107517	0.369979	0.15264	-0.217338
uc007qbn.2,uc007qbo.2,uc007qbp.2,uc007qbq.1:chr13:+:34967362:34997933:Prpf4b:19:	ALE	E19,E20	E19,E21,E22,E23	-20	-1.17234	18.8277	4.70376e-06	0.000109745	0	0.314382	0.314382
uc008zmq.1,uc008zmr.1,uc008zms.1,uc008zmt.1,uc008zmu.1,uc008zmv.1:chr5:-:123320684:123439101:Kdm2b::16-18-19-20-21-23-24-25-26-27-29>	AFE	E15,E16	E4,E5,E6,E7,E8,E9,E10,E12,E13,E14,E16	0.61453	-1.67604	-2.29057	5.10576e-06	0.000118763	0.0662597	0.534299	0.468039
uc008gdy.2,uc008gdz.2,uc008gea.2,uc008geb.2,uc008gec.2,uc008ged.2:chr19:-:5603013:5610094:Kat5:8-9-10-11-12-13:	ALE	E13,E14,E15	E13,E17,E18,E19	-1.00915	-2.78158	-1.77242	5.24217e-06	0.000121568	0.519237	0.112741	-0.406496
uc009ibj.2,uc009ibk.2,uc009ibl.2,uc012fns.1:chr7:-:88035608:88046155:Wdr73:<1:3-4	IR	E1,E3	E1,E2,E3	-1.43785	1.72499	3.16284	5.32014e-06	0.000123004	0.616801	0.0554595	-0.561341
uc007daf.1,uc007dag.2,uc007dah.1,uc007daj.2,uc011wtu.1:chr1:+:155596555:155611351:Rnasel:<2.3.4:	ALE	E4,E5	E4,E6,E7,E8	-0.130688	-2.79337	-2.66268	5.35553e-06	0.00012345	0.655239	0.105373	-0.549866
uc007hof.1,uc007hog.2,uc007hoh.2:chr10:+:128227965:128237880:Mmp19::4-5-6-7-8-9-10-12.13>	AFE	E1,E2,E4	E3,E4	-0.00708494	1.80734	1.81443	5.47434e-06	0.000124817	0.754201	0.951522	0.19732
uc007joo.1,uc007jop.1,uc007joq.1:chr11:+:68781632:68786017:Slc25a35:<1-2:4.5	IR	E2,E4	E2,E3,E4	2.25143	0.649729	-1.6017	5.47984e-06	0.000124817	0.0365472	0.15703	0.120483
uc008chm.2,uc012arg.1:chr17:+:35516561:35521619:H2-Gs10,H2-gs10:<1-2:4-5-6-7>	IR	E2,E4	E2,E3,E4	-0.173665	0.87204	1.0457	5.47767e-06	0.000124817	0.406842	0.19281	-0.214032
uc009ifz.1,uc009iga.1:chr7:-:96656294:96675685:Prss23::3>	AFE	E1,E3	E2,E3	-3.04281	0.48918	3.53199	5.45433e-06	0.000124817	0.957074	0.414361	-0.542713
uc008dpj.2,uc012axl.1:chr17:+:79315838:79320388:1110001A16Rik::3-4-5-6>	AFE	E1,E3	E2,E3	-2.81807	0.39999	3.21806	5.53082e-06	0.000125235	0.776907	0.0995316	-0.677375
uc008mpg.2,uc008mph.2,uc008mpi.2,uc008mpj.2,uc008mpk.2,uc008mpl.2,uc008mpm.1:chr2:-:139659215:139892521:Tasp1::4-5-7-8-9	AFE	E1,E2,E4	E3,E4	-2.1557	1.02302	3.17872	5.53069e-06	0.000125235	0.442916	0.967266	0.52435
uc008xaa.1,uc008xab.1,uc008xac.2,uc008xad.2,uc008xae.2,uc008xaf.2:chr5:+:33206369:33336882:Depdc5:<1:	ALE	E1,E2	E1,E3,E4,E5,E6,E7,E8,E9,E11,E12,E13,E14,E15,E16,E17,E18,E19,E21,E22,E23,E24,E25,E26,E27,E28,E30,E31,E32,E33,E34,E35,E36	0.941885	-1.59315	-2.53503	5.95821e-06	0.000134515	0.957362	0.648324	-0.309038
uc007cdx.1,uc007cdy.1,uc007cdz.1:chr1:-:95302516:95375385:Hdlbp::3-4-5-6-7-8-9-10-12-13-14-15-16-17-18-19-20-21-22-23-24-25-26-27-28-29-30>	AFE	E1,E3	E2,E3	-1.76303	-0.25894	1.50409	6.10596e-06	0.00013725	0.885431	0.629771	-0.25566
uc007ekq.2,uc007ekr.2,uc007eks.2,uc007ekt.2:chr10:-:12927522:13194202:Phactr2::4-5-6	AFE	E1,E4	E3,E4	0.597837	-20	-20.5978	6.12917e-06	0.00013725	0.651591	1	0.348409
uc008lwc.1,uc008lwd.1,uc008lwe.1,uc008lwf.1,uc012ccg.1:chr2:-:120332565:120389567:Zfp106:<1-2-3.4:9-10-11-12-13-15-16-17-18-19-20-21-22	ES	E4,E9	E7,E9	1.55797	-1.48678	-3.04475	6.15084e-06	0.00013725	0.0191734	0.296188	0.277015
uc009mwt.1,uc009mwu.1:chr8:+:97190654:97198322:Arl2bp::3-4-5-6-7>	AFE	E1,E3	E2,E3	5.06708	2.07311	-2.99397	6.14673e-06	0.00013725	0.00307965	0.1229	0.11982
uc007xrc.2,uc007xrd.2,uc007xre.1,uc011zzl.1:chr15:-:100218330:100254645:Nramp2,Slc11a2:5-6-7-8-9-10-11-12-13-14-15-16-17-18:	ALE	E18,E19	E18,E20	-1.37077	0.0722355	1.44301	6.2081e-06	0.000138126	0.102719	0.342311	0.239592
uc009igp.1,uc009igq.1,uc009igr.1,uc009igs.1,uc009igt.1,uc009igu.1,uc009igv.1,uc009igw.1:chr7:+:97278741:97357442:Picalm,mKIAA4114:18-19-20:22-23-24>	ES	E20,E22	E20,E21,E22	0.379956	-0.918677	-1.29863	6.30882e-06	0.000139961	0.372633	0.697001	0.324368
uc009gtr.1,uc009gts.1,uc009gtt.1,uc009gtu.1:chr7:-:52397209:52409908:Aldh16a1,mFLJ00209:<1-2:	ALE	E2,E3	E2,E4,E5,E6,E7,E8,E9,E10,E11,E12,E13,E14,E15,E16,E17,E19	-1.50172	-3.38425	-1.88253	6.42233e-06	0.000142069	0.580091	0.185434	-0.394657
uc007dvq.1,uc011wxn.1:chr1:-:181675034:181734146:Ahctf1:<1-2-3-4-5-6-7-8-9-10-11-12-13-14-15-16-17-18-19-20-21-22-23-24-25-26-27-28-29-30-31-32-33-34-35:37.38>	IR	E35,E37	E35,E36,E37	-1.27586	1.87552	3.15138	6.62071e-06	0.000144788	0.518251	0.0481386	-0.470113
uc009lxj.1,uc009lxk.1,uc009lxl.1,uc009lxm.1,uc009lxn.1,uc012gen.1:chr8:-:72229036:72240847:Zfp869::5	AFE	E3,E5	E4,E5	1.28783	-0.435803	-1.72364	6.60858e-06	0.000144788	0.155876	0.519728	0.363853
uc009mco.2,uc009mcp.2,uc009mcq.2,uc009mcr.2,uc009mcs.2,uc009mct.2:chr8:+:73890746:73893631:Use1::5-7-8-9-10	AFE	E3,E5	E4,E5	1.76996	-0.00642976	-1.77639	6.58399e-06	0.000144788	0.121289	0.475372	0.354083
uc009mlc.2,uc009mld.2,uc009mle.2,uc012ggt.1:chr8:-:86247149:86265210:Cd97:4-5:8-9-10-11-12-13-14-15-16-17-18-19-20-21>	ES	E5,E8	E5,E7	1.80512	0.193576	-1.61154	6.59512e-06	0.000144788	0.0897536	0.313647	0.223894
uc009qzk.1,uc009qzl.1,uc009qzm.1:chr9:+:89106027:89135063:Mthfs::4-6>	AFE	E1,E4	E2,E4	2.27263	1.02871	-1.24392	6.7237e-06	0.000146622	0.113211	0.331126	0.217916
uc008nsi.1,uc008nsj.1,uc008nsk.1:chr2:+:162843207:162871871:Ift52:<1.2:4-5-6-7-8-9-10-11-13-14-15-16>	A5SS	E2,E4	E2,E3,E4	-0.641258	1.44788	2.08914	6.77898e-06	0.000147409	0.497424	0.102052	-0.395372
uc007erh.1,uc007eri.1,uc011xbv.1:chr10:-:24888895:25018969:Akap7::11>	AFE	E10,E11	E2,E3,E4,E6,E7,E8,E9,E11	-1.625	-5.41805	-3.79305	6.93277e-06	0.000150061	0.51489	0.991648	0.476759
uc007nqd.2,uc007nqe.2,uc007nqf.2,uc007nqg.2,uc007nqh.1,uc007nqi.2,uc011ymd.1:chr12:+:60230732:60291207:Ctage5:6:8-9-10-11-12-13-14-15-16-17.18-19-20-21	ES	E6,E8	E6,E7	0.916291	-2.83034	-3.74663	6.95957e-06	0.000150061	0.5	0.941959	0.441959
uc008otx.2,uc008oty.1,uc012cob.1,uc012coc.1,uc012cod.1:chr3:+:28162135:28569507:Tnik:<7-9-10-11-12-13-14:16-17-18-19-20-21-23-24-25-26-27>	ES	E14,E16	E14,E15,E16	3.42047	-0.214065	-3.63454	6.9477e-06	0.000150061	0.0142699	0.516014	0.501744
uc009qrn.2,uc009qro.1,uc009qrp.1,uc012gwx.1:chr9:+:74885420:74908120:Arpp19::3-6-7>	AFE	E1,E3	E2,E3	-0.553957	1.85437	2.40833	7.12422e-06	0.000153181	0.509992	0.0804475	-0.429545
uc009cbq.2,uc009cbr.2:chr6:-:56832394:56873926:Nt5c3::3	AFE	E1,E3	E2,E3	3.87806	-0.600382	-4.47844	7.1894e-06	0.00015415	0.0764139	0.889864	0.81345
uc007hrj.3,uc007hrk.2,uc007hrm.3:chr10:+:129759907:129801167:5830405N20Rik:<1:3-4-5-7-8-9-10-11>	ES	E1,E3	E1,E2,E3	0.586271	-2.57812	-3.16439	7.45814e-06	0.000159467	0.257858	0.843926	0.586068
uc008jev.1,uc008jew.1,uc008jex.1,uc008jey.1,uc012btt.1:chr2:+:32143772:32163441:Golga2,mKIAA4150:<1-2:4	ES	E2,E4	E3,E4	0.249212	-0.993962	-1.24317	7.5553e-06	0.000161096	0.368446	0.674157	0.305711
uc008ryf.2,uc008ryg.2,uc008ryh.1,uc008ryi.2,uc008ryj.2,uc008ryk.2,uc008ryl.2,uc008rym.1,uc008ryn.2,uc008ryo.2,uc008ryp.1,uc012dak.1:chr4:-:9376231:9596491:Asph:18-19-20-21:	ALE	E21,E22	E21,E23,E24,E25,E26,E27,E28,E29,E30,E31,E32,E33	-1.86328	0.530058	2.39333	7.58447e-06	0.00016127	0.328734	0.850393	0.521659
uc007fdz.1,uc007fea.1,uc007feb.1,uc007fec.1,uc011xef.1:chr10:+:59342338:59360764:Dnajb12,mDj10:10:	ALE	E10,E11	E10,E12	-0.655876	-2.541	-1.88512	7.75874e-06	0.00016452	0.501432	0.136575	-0.364857
uc007sjr.2,uc007sjs.2,uc007sjt.2,uc007sju.2,uc007sjv.2:chr14:-:21274482:21299355:Anxa7:3-4-6-7:9-10-11-12-13-14-16-17>	ES	E7,E9	E7,E8,E9	2.97951	1.11116	-1.86835	7.78105e-06	0.000164538	0.0135899	0.154814	0.141224
uc007rsk.2,uc007rsl.1,uc007rsm.1,uc007rsn.1,uc011zed.1,uc011zee.1,uc011zef.1:chr13:-:104608865:104710594:Erbb2ip,mKIAA1225:<1-2-3-4-5-6-7-8-9-10-11-12-13-14-15-16-17-18-20-21-22:25-26.27	ES	E22,E25	E22,E23,E25	-0.290176	1.44787	1.73805	8.10516e-06	0.000170921	0.471652	0.136936	-0.334716
uc009olj.1,uc009olk.1,uc009oll.1,uc009olm.1,uc009oln.1:chr9:+:21229388:21312198:Dnm2::12	AFE	E11,E12	E1,E2,E3,E4,E5,E6,E7,E8,E9,E12	-1.11411	-2.87077	-1.75666	8.20568e-06	0.000172567	0.184125	0.586214	0.402089
uc007tia.2,uc007tib.2,uc007tic.2:chr14:+:47993534:48005842:Lgals3:<1:5-6-7-8-9>	A5SS	E1,E5	E1,E2,E3,E5	0.400615	-0.408392	-0.809006	8.32693e-06	0.000174638	0.376458	0.574525	0.198068
uc007vkk.1,uc007vkl.1:chr15:+:31531870:31547290:Fam173b:<1:6>	ES	E1,E6	E1,E3	0.319917	-1.38985	-1.70977	8.59869e-06	0.000179846	0.202613	0.55914	0.356527
uc008rst.1,uc008rsu.1,uc008rsv.1,uc008rsw.1,uc008rsx.1,uc008rsy.1,uc008rsz.1,uc008rta.1:chr3:+:151873421:151899794:Fubp1:26:28.29.30>	IR	E26,E28	E26,E27,E28	0.863035	-2.05207	-2.91511	9.05413e-06	0.000188125	0.35243	0.585751	0.23332
uc009twe.1,uc009twf.1,uc009twg.1:chrX:-:97818244:97821277:Pdzd11:<1.2.3:6-7-8-9-10-11>	A5SS	E3,E6	E4,E6	-1.32784	0.0594137	1.38725	9.03265e-06	0.000188125	0.73713	0.42111	-0.31602
uc008ang.1,uc008anh.1,uc008ani.1,uc012ako.1:chr17:+:15080188:15082944:1600012H06Rik:<1:4.5>	IR	E1,E4	E1,E2,E3,E4	0.215641	-0.975747	-1.19139	9.38358e-06	0.000194147	0.271975	0.575572	0.303597
uc009rgn.1,uc009rgo.1,uc009rgp.1,uc009rgq.1,uc009rgr.2:chr9:-:103255431:103268110:Cdv3::6-7-8	AFE	E1,E2,E3,E4,E6	E5,E6	3.46894	0.495223	-2.97372	9.48029e-06	0.00019562	0.991866	0.589122	-0.402744
uc007yzj.2,uc007yzk.2,uc007yzl.2,uc007yzm.2,uc007yzn.1:chr16:-:32821787:32877852:1700021K19Rik,mKIAA0226::3-4-5-6-7-8	AFE	E1,E3	E2,E3	-3.31678	-0.893818	2.42296	9.65142e-06	0.00019849	0.979122	0.812656	-0.166466
uc008som.1,uc008son.1,uc008soo.1,uc008sop.1:chr4:+:42962738:42971604:Dnajb5::5-6-7>	AFE	E1,E5	E4,E5	4.49708	1.12347	-3.3736	9.6711e-06	0.00019849	0.0278512	0.475048	0.447197
uc009hyu.2,uc009hyv.2,uc009hyw.1,uc009hyx.2,uc012fnk.1:chr7:-:86866049:86877662:Plin,Plin1:4-5:	ALE	E5,E6	E5,E7,E8,E9	-3.61896	-1.85183	1.76712	9.71526e-06	0.000198865	0.00906359	0.096149	0.0870854
uc007uxp.2,uc007uxq.2,uc007uxr.2,uc007uxs.2:chr14:+:105657889:105708515:N4wbp5A,Ndfip2:<1-2-3-6-8-9-10:12>	A3SS	E10,E12	E10,E11,E12	0.392987	-1.06175	-1.45474	9.8927e-06	0.000201958	0.249961	0.585222	0.335261
uc007khg.1,uc007khh.1,uc007khi.1,uc007khj.1,uc007khk.1,uc007khl.1,uc011xzx.1,uc011xzy.1:chr11:+:77590766:77679482:Myo18a::5-6-7-8-9-10-11-12	AFE	E1,E5	E2,E5	0.0519865	2.59076	2.53877	1.05766e-05	0.000214778	0.925792	0.450707	-0.475085
uc009kqj.2,uc009kqk.2,uc012fxz.1,uc012fya.1:chr7:-:151662659:151739634:Ppfia1:<1-2-3-4-5-6-7-8-9:11-12-13-14-15-16-17-19-20-21-22-23-27-28-29-30-31	ES	E9,E10,E11	E9,E11	-4.5087	-1.55118	2.95752	1.05724e-05	0.000214778	0.01059	0.124652	0.114062
uc008wzv.1,uc008wzw.1,uc008wzx.1:chr5:-:33078961:33128275:Pisd::6-7-8-9-10>	AFE	E1,E2,E3,E6	E4,E5,E6	1.2994	3.0316	1.7322	1.08148e-05	0.000219036	0.304626	0.0496489	-0.254977
uc008jpc.1,uc008jpd.1,uc008jpe.1,uc008jpf.1,uc008jpg.1,uc008jph.1,uc008jpi.1,uc008jpj.1:chr2:-:44839153:44972915:Zeb2,mKIAA0569::3	AFE	E1,E3	E2,E3	0.77786	-2.88385	-3.66171	1.08574e-05	0.00021932	0.322656	0.909809	0.587153
uc009jlw.1,uc009jlx.1:chr7:+:126937643:126992455:2610020H08Rik:<1:	ALE	E1,E2	E1,E5,E6,E7,E8,E9,E10,E11,E12,E13,E14,E15,E16	0.471683	-2.31246	-2.78414	1.09981e-05	0.000221578	0.943757	0.498248	-0.445509
uc007vpu.1,uc007vpv.1,uc007vpw.1:chr15:+:44259637:44269231:Eny2:<1.2:4-5-7-8>	A5SS	E2,E4	E2,E3,E4	-2.74239	-0.803417	1.93898	1.1462e-05	0.000229866	0.895248	0.659167	-0.236081
uc009rqn.1,uc009rqo.1,uc009rqp.1,uc009rqq.1,uc009rqr.1:chr9:-:108505273:108556012:Ari2,Arih2:5-6-7-8-10-11-12-13-14-15-16-17:19-20>	A3SS	E17,E19	E17,E18,E19	0.659389	2.4166	1.75721	1.14693e-05	0.000229866	0.282719	0.0661651	-0.216554
uc007ihk.2,uc007ihl.2,uc007ihm.2,uc007ihn.2,uc007iho.2:chr11:+:29592897:29644414:Rtn4::6-7-8-9-10-11>	AFE	E1,E6	E5,E6	-0.279786	-3.29502	-3.01523	1.16119e-05	0.000231761	0.749406	0.995174	0.245768
uc008oit.1,uc008oiu.1:chr2:-:179993243:180008170:Cables2:<1:3-4-5-6-7-8-9-10>	ES	E1,E3	E1,E2,E3	-0.872454	-20	-19.1275	1.16243e-05	0.000231761	0.685248	1	0.314752
uc008ptz.1,uc008pua.1,uc008pub.1,uc008puc.1:chr3:+:87946316:87973562:Mef2d:<1-2-3:6-7-8	ME	E3,E4,E6	E3,E5,E6	2.72483	1.25782	-1.46701	1.16927e-05	0.000232522	0.94773	0.809169	-0.138561
uc009sdp.1,uc009sdq.1,uc009sdr.1,uc009sds.1,uc009sdt.1:chr9:+:121628298:121665959:Nktr::3-4	AFE	E1,E3	E2,E3	2.31831	0.916291	-1.40202	1.19049e-05	0.00023613	0.197188	0.506209	0.309021
uc009pvr.1,uc009pvs.1:chr9:-:57598517:57613667:Clk3:5-6-7-8-9-10-11-12:14>	IR	E12,E14	E12,E13,E14	-0.708817	0.545988	1.25481	1.20966e-05	0.000239312	0.382071	0.134172	-0.247899
uc008bpv.1,uc008bpw.1,uc008bpx.1,uc008bpy.1,uc008bpz.1:chr17:+:28046284:28199581:Anks1:26:28.29>	IR	E26,E28	E26,E27,E28	0.845359	-0.43084	-1.2762	1.2508e-05	0.000246816	0.0697741	0.200051	0.130277
uc008juq.2,uc008jur.2,uc008jus.2,uc008jut.2,uc008juu.2,uc008juv.1:chr2:-:60590009:60801261:Rbms1::4-5-6-7-9-10-11-12	AFE	E1,E4	E3,E4	-0.0120072	1.66341	1.67542	1.30889e-05	0.000257617	0.61771	0.241459	-0.376251
uc009fwi.2,uc009fwj.2,uc009fwk.2,uc012fgi.1:chr7:+:28284342:28305060:Prx::6-7-9>	AFE	E1,E2,E3,E4,E6	E5,E6	-0.7638	1.55449	2.3183	1.31475e-05	0.000258108	0.206385	0.674229	0.467843
uc007vah.2,uc007vai.1,uc007vaj.1,uc007vak.1,uc007val.1,uc011zqg.1,uc011zqh.1,uc011zqi.1:chr14:-:121941260:122196956:Dock9:46-47-48-49-50-51:53-54-55-58-59-60-61-62-64	ES	E51,E53	E51,E52,E53	0.0969035	1.31887	1.22197	1.32192e-05	0.000258854	0.381433	0.14633	-0.235103
uc008cax.1,uc008cay.1,uc008caz.1,uc008cba.1:chr17:+:34168796:34175344:Rxrb::3-4-5-6-7-8	AFE	E1,E3	E2,E3	1.70569	0.0672024	-1.63849	1.35554e-05	0.000264129	0.400004	0.784948	0.384944
uc009bcx.2,uc009bcy.2:chr6:-:29073572:29114724:Rbm28::10-11-12-13-14-15-16-17-18-19-20-21>	AFE	E1,E2,E3,E4,E5,E6,E7,E8,E10	E9,E10	1.09079	4.71603	3.62523	1.35574e-05	0.000264129	0.501142	0.970013	0.468871
uc008iux.1,uc008iuy.1,uc008iuz.1,uc008iva.1,uc008ivb.1,uc008ivc.1:chr2:-:26238319:26244836:Sdccag3::11-12-13-14>	AFE	E10,E11	E9,E11	2.48986	0.0139006	-2.47596	1.39224e-05	0.000270553	0.335279	0.81612	0.480842
uc007zbc.1,uc007zbd.1,uc007zbe.1,uc007zbf.1,uc007zbh.1:chr16:+:34745295:35002520:Mlyk,Mylk::36-37-38>	AFE	E34,E36	E35,E36	-2.04697	0.273941	2.32091	1.46117e-05	0.000282518	0.818669	0.294124	-0.524545
uc009lkk.1,uc009lkl.1,uc009lkm.1,uc009lkn.1:chr8:-:34893115:35040313:Rbpms:8:10>	ES	E8,E10	E8,E9,E10	0.0520054	1.38087	1.32886	1.47216e-05	0.000283928	0.40498	0.160348	-0.244632
uc009rmv.2,uc009rmw.2,uc009rmx.2,uc009rmy.2,uc009rmz.2,uc009rna.2,uc012hak.1:chr9:-:107642825:107673333:Rbm5:<1-2-3-4.5-7:9	IR	E7,E9	E7,E8,E9	-1.93827	-0.717093	1.22117	1.56119e-05	0.000300125	0.691363	0.390795	-0.300567
uc008yog.1,uc008yoh.1,uc008yoi.1,uc008yoj.1,uc008yok.1,uc008yol.1,uc008yom.1,uc008yon.1,uc008yoo.1:chr5:-:108998432:109058758:Gak:23-24-25-27-28-29-30:32>	IR	E30,E32	E30,E31,E32	0.177266	1.36949	1.19223	1.60525e-05	0.00030728	0.330157	0.122683	-0.207474
uc009gca.1,uc009gcb.1,uc009gcc.1:chr7:+:30569808:30579559:Zfp30,mKIAA0961:6:	ALE	E6,E7	E6,E8	20	-0.496437	-20.4964	1.68915e-05	0.000322534	1	0.329851	-0.670149
uc007qum.1,uc007qun.1,uc007qup.1,uc007quq.1,uc007qur.1,uc007qus.1,uc011zar.1:chr13:-:59550895:59658680:Agtpbp1,Nna1:<1.2:5-6-7-8	A5SS	E2,E5	E2,E3,E5	-1.21913	0.509254	1.72838	1.7074e-05	0.000325212	0.654441	0.327485	-0.326956
uc007boz.1,uc007bpa.1,uc007bpb.1,uc007bpc.1,uc011wnq.1:chr1:+:75371871:75428881:Speg:9.10-11-12-14-15-16:	ALE	E16,E17	E16,E18,E19,E20,E21,E22,E23,E24,E25,E26,E27,E28,E29,E30,E31,E32,E33,E34,E35,E36,E37,E38,E39,E40,E41,E42,E43,E44,E45,E46,E47,E48,E49	0.237931	-1.49284	-1.73077	1.72474e-05	0.000326891	0.921883	0.494751	-0.427132
uc008ycg.1,uc008ych.1,uc008yci.1,uc008ycj.1,uc008yck.1:chr5:-:92481171:92512761:G3bp2:<1.2-5-6-7-8-9-10:12-13-14-15>	ES	E10,E12	E10,E11,E12	1.06322	-0.097826	-1.16105	1.72229e-05	0.000326891	0.180516	0.433597	0.253081
uc009ico.2,uc009icp.2,uc009icq.1,uc012fob.1:chr7:+:89003907:89028954:Tm6sf1::9-11-12-13>	AFE	E1,E3,E4,E5,E6,E7,E9	E8,E9	0.749836	2.48857	1.73873	1.742e-05	0.000329349	0.793213	0.958752	0.16554
uc007bqn.2,uc007bqo.2,uc007bqp.2,uc011wnu.1,uc011wnv.1:chr1:+:78654399:78704318:Acsl3,Utp14b:<1:6-7-8-9-10-11-12-13-14-15-16-17-18-19>	ES	E1,E6	E4,E6	3.84841	-0.134616	-3.98302	1.75355e-05	0.000330718	0.00857244	0.426472	0.417899
uc008fpx.1,uc008fpy.1:chr18:+:75165521:75169587:BC031181:2:4-5>	A5SS	E2,E4	E2,E3,E4	0.427641	-0.756321	-1.18396	1.76982e-05	0.000332156	0.307059	0.587242	0.280183
uc007lqf.2,uc007lqg.2,uc007lqh.2,uc007lqi.2,uc007lqj.2:chr11:+:101902824:101916931:Cd300lg:3:5-7-9-10-11>	A3SS	E3,E5	E3,E4	0.483933	-0.86904	-1.35297	1.78604e-05	0.000333827	0.230575	0.484774	0.254199
uc009cio.1:chr6:+:72364326:72380701:Ggcx:<1-2-3-4-5-6-7-8-9:11-12-13-14-15>	ES	E9,E10,E11	E9,E11	0.949375	3.21398	2.2646	1.78743e-05	0.000333827	0.638728	0.963927	0.325199
uc009stf.2,uc009stg.2,uc009sth.2,uc009sti.2,uc009stk.1,uc012hff.1:chrX:+:20194628:20228031:Rbm10:<1.2-4-5:7-8-9	ES	E5,E7	E5,E6,E7	-0.960047	0.89405	1.8541	1.80973e-05	0.000337172	0.569718	0.158959	-0.410759
uc009oki.2,uc009okj.2,uc009okk.1,uc009okl.2,uc009okm.2:chr9:+:20970157:21017692:Pde4a:4:6-8-10-11-13-14-15-16-17-18-19-20-21>	IR	E4,E6	E4,E5,E6	0.22877	1.35529	1.12652	1.84939e-05	0.000343727	0.144756	0.0543947	-0.0903611
uc007mkj.1,uc007mkk.1,uc007mkl.1,uc007mkm.1:chr11:-:116033201:116060359:Acox1:3:6-7-8-9-10-11-12-13-14-15-16>	ES	E3,E6	E3,E4	-0.724553	1.19888	1.92343	1.86258e-05	0.000345342	0.506212	0.12434	-0.381872
uc007mks.2,uc007mkt.2,uc007mku.2:chr11:-:116149311:116168052:Exoc7:10-11-12-13-14:16-17-18-19-20-21-22>	ES	E14,E16	E14,E15,E16	3.0969	1.56916	-1.52774	1.87835e-05	0.000347427	0.034179	0.151198	0.117019
uc007cte.1,uc007ctf.1,uc011wsj.1,uc011wsk.1:chr1:-:137278891:137327068:Importin9,Ipo9:<1:3-4-5-6-7-8-9-10-11-12-13-14-15-16-19-20-21-22-23-24-25-26-27>	ES	E1,E3	E1,E2,E3	0.547079	1.83104	1.28396	1.89083e-05	0.000348058	0.28097	0.095	-0.18597
uc009rno.1,uc009rnp.1,uc009rnq.1,uc009rnr.2,uc009rnt.1,uc009rnu.2,uc009rnx.2,uc009rny.2,uc009rnz.1,uc009roa.1,uc009rob.1,uc009roc.1,uc009rod.1,uc009roe.1,uc009rof.1,uc012han.1,uc012hao.1,uc012hap.1,uc012haq.1:chr9:+:107877897:107951113:AK157941,AK197603,Cdh29,Cdhr4,D330022A01Rik,Ip6k1,Uba7,Ube1l:31-32:34>	IR	E32,E34	E32,E33,E34	0.0178456	-1.12974	-1.14759	1.88722e-05	0.000348058	0.255117	0.512316	0.257199
uc008hhi.1,uc008hhj.1,uc008hhk.1,uc012bkz.1,uc012bla.1,uc012blb.1:chr19:+:36422943:36530694:AK080025,Pcgf5::5-6-7-8.9-10-11-12	AFE	E1,E5	E4,E5	-0.722135	0.137784	0.859918	1.92436e-05	0.000353382	0.598083	0.385337	-0.212746
uc009rqu.1,uc009rqv.1,uc009rqw.1,uc009rqx.1,uc009rqy.1:chr9:+:108686126:108708664:AK057615,Ip6k2:<1-3:	ALE	E3,E12,E13,E14,E15,E16	E3,E4,E5,E6,E7	-0.66921	0.77622	1.44543	1.93746e-05	0.00035494	0.834013	0.575167	-0.258846
uc009cms.2,uc009cmt.2,uc009cmu.2:chr6:+:83085801:83102573:Rtkn::5-6-7-8-9-10-11-12-13-14-15>	AFE	E1,E5	E4,E5	-0.129212	-2.68558	-2.55637	1.95269e-05	0.000356877	0.484617	0.92816	0.443543
uc008pax.2,uc008pay.2:chr3:+:37538868:37543521:Spry1:3:5>	ES	E3,E5	E3,E4	-2.24702	-0.241162	2.00585	1.98476e-05	0.000361878	0.811407	0.28987	-0.521536
uc007ywe.2,uc007ywf.2,uc007ywg.2:chr16:+:29579419:29654688:Opa1::20-21-22-23-24-25-26-27-28-29-30-31-32>	AFE	E19,E20	E8,E9,E10,E11,E12,E13,E14,E15,E16,E17,E18,E20	-0.893069	-3.51625	-2.62318	2.01109e-05	0.000365809	0.703323	0.980962	0.277639
uc007pbf.1,uc007pbj.2,uc007pbk.1,uc007pbl.1,uc007pbm.1,uc007pbn.1,uc011yur.1,uc011yus.1:chr12:+:111140610:111821271:Ppp2r5c,mKIAA0044::7-8-9-10-11-12-13-14-15-16-17	AFE	E5,E7	E6,E7	-4.09262	-1.69602	2.3966	2.03641e-05	0.000369539	0.988575	0.806765	-0.18181
uc007clh.1,uc007cli.1,uc007clj.1,uc011wrb.1:chr1:+:129999882:130134312:R3hdm1:17:20-21-22-23-24-25-26-27-28-29>	ES	E17,E20	E17,E19,E20	1.60961	-0.076659	-1.68627	2.06292e-05	0.000373466	0.122218	0.41981	0.297593
uc008crv.2,uc008crw.2,uc012aul.1:chr17:+:46297980:46306319:Gtpbp2:<1.2:	ALE	E2,E3	E2,E4,E5,E6,E7,E8,E9,E10,E11,E12,E13,E14	-0.920344	-2.21654	-1.2962	2.10616e-05	0.000379505	0.710437	0.373941	-0.336496
uc007ser.2,uc007ses.2,uc007set.2,uc007seu.2,uc011zfv.1:chr14:+:8930726:8997625:Pxk:<1-2-3-4-5-6-7-8-9-10-11:	ALE	E11,E12	E11,E13,E14,E15,E16,E17	-1.44577	-3.79779	-2.35202	2.20423e-05	0.00039532	0.0766877	0.00548542	-0.0712023
uc007ycv.1,uc007ycw.1,uc007ycx.1,uc007ycy.1,uc007ycz.1:chr16:-:8688814:8792401:Hausp,Usp7:<3-4-5.6-7-8-9-10-11-12-13-14-15-16-17-18-19:	ALE	E19,E20	E19,E21,E22,E23,E24,E26,E27,E28,E29,E30,E31,E32,E34,E35,E36,E37	-0.657159	-3.15705	-2.49989	2.20127e-05	0.00039532	0.72863	0.165444	-0.563185
uc007zxg.2,uc007zxh.2,uc007zxi.2:chr16:+:91373027:91405832:Ifnar2:<1-2-3-4-5-6-7:	ALE	E7,E8	E7,E9,E10	-1.26737	1.11597	2.38335	2.21599e-05	0.000396502	0.803438	0.981213	0.177775
uc007pea.1,uc007peb.1:chr12:+:113052480:113066287:Zfyve21:<1-2-3-4-5:7-8>	ES	E5,E7	E5,E6,E7	2.10145	0.761452	-1.34	2.23434e-05	0.000398856	0.0872006	0.271092	0.183892
uc009fyh.1,uc009fyi.1,uc009fyj.1,uc009fyk.1,uc012fgq.1:chr7:-:29099914:29123738:Supt5h::4-6-7-8-9-10-11-13-14-15	AFE	E1,E2,E4	E3,E4	0.550378	2.7615	2.21112	2.24475e-05	0.000399784	0.929696	0.992668	0.0629716
uc007lbf.2,uc007lbg.2:chr11:-:95934106:95937008:Atp5g1::4-5-6-7>	AFE	E1,E2,E4	E3,E4	1.30039	-0.813132	-2.11353	2.26924e-05	0.00040321	0.787339	0.314578	-0.472761
uc008flv.1,uc008flw.1,uc008flx.1:chr18:-:67385183:67405484:Mppe1::9	AFE	E3,E4,E5,E6,E7,E9	E8,E9	0.400531	2.30661	1.90607	2.28328e-05	0.000404769	0.679522	0.939464	0.259941
uc008fah.1,uc008fai.1,uc008faj.1,uc008fak.1:chr18:+:60685874:60718416:Dctn4:<1:	ALE	E1,E2	E1,E3,E4,E5,E6,E8,E9,E10,E11,E13,E14,E15,E16	-0.982081	-2.47922	-1.49714	2.33847e-05	0.000413597	0.483484	0.182425	-0.301059
uc007oxi.1,uc007oxj.1,uc007oxk.1,uc011yrh.1,uc011yri.1:chr12:-:105925951:105990162:Dicer1::4-5-6-7-8-10-11-13-14-15-16-17-18-19-20-21-22-23-24-25-26-28-29-30-31-32>	AFE	E1,E4	E2,E3,E4	0.870152	-3.57442	-4.44457	2.3771e-05	0.00041888	0.334426	0.992415	0.657989
uc007dpr.2,uc007dps.2,uc007dpt.2,uc007dpu.2,uc007dpv.2,uc007dpw.2,uc007dpx.2:chr1:+:174078145:174126524:Dcaf8,Wdr42a:<1.2:6-7-8-10-11-12-13-14-15	A5SS	E2,E6	E4,E6	-1.33066	0.263852	1.59451	2.40767e-05	0.000422912	0.69231	0.289132	-0.403178
uc007ueo.2,uc007uep.2,uc007ueq.2,uc011zmv.1,uc011zmw.1,uc011zmx.1:chr14:-:60178224:60216796:Cdadc1:<1-2-3-4-5:	ALE	E5,E6	E5,E7,E8,E9,E10	-0.887076	-2.82304	-1.93596	2.47015e-05	0.000432897	0.136383	0.0171668	-0.119216
uc009gjc.1,uc009gjd.1,uc009gje.1:chr7:-:35129738:35174559:Lsm14a:<1-2-3-4:6-7-8-9	ES	E4,E6	E4,E5,E6	-3.30371	-1.74631	1.5574	2.6061e-05	0.000455682	0.956658	0.795668	-0.16099
uc008axy.2,uc008axz.2,uc008aya.2,uc008ayb.2:chr17:+:24857007:24858872:Gm10653,Rps2:<1.2:4-5-6.7-8-10>	IR	E2,E4	E2,E3,E4	1.83105	0.181882	-1.64916	2.65271e-05	0.000462778	0.0632181	0.480282	0.417063
uc007lgc.1,uc007lgd.1,uc007lge.1:chr11:+:98219697:98242412:Stard3::17-18>	AFE	E1,E2,E4,E5,E6,E7,E8,E9,E10,E11,E12,E13,E14,E15,E17	E16,E17	1.33351	3.14285	1.80933	2.66293e-05	0.000463506	0.234272	0.726652	0.49238
uc009etv.1,uc009etw.1,uc009etx.1,uc009ety.1,uc009etz.1:chr6:+:149090118:149099692:4833442J19Rik:<1:4	ES	E1,E4	E1,E2,E4	1.00177	-0.765937	-1.76771	2.71884e-05	0.000472167	0.214131	0.593034	0.378904
uc008txq.1,uc012dht.1:chr4:+:102986450:103039033:Oma1:<1-2-3.4-5-6:8-9-10.11.12>	ES	E6,E8	E6,E7,E8	-1.12954	-3.02285	-1.89331	2.73832e-05	0.000474477	0.688328	0.933737	0.245409
uc007mmp.1,uc007mmq.1,uc007mmr.1,uc007mms.1,uc007mmt.1,uc011yig.1:chr11:+:116714608:116736951:AK007898,Mfsd11:<1.2:4	IR	E2,E4	E2,E3,E4	0.131324	-0.97648	-1.1078	2.77639e-05	0.00047999	0.37657	0.665464	0.288894
uc009ber.1,uc009bes.1,uc009bet.1,uc009beu.1,uc009bev.1,uc009bew.1,uc009bex.1:chr6:+:29997987:30103458:Nrf1:5-7-9-11-12-13-14-15-16:	ALE	E16,E18	E16,E19	-1.98655	-0.455476	1.53107	2.8754e-05	0.00049599	0.309649	0.661995	0.352346
uc008nnr.1,uc008nnt.1,uc008nnu.1,uc008nnv.1,uc012chu.1,uc012chv.1:chr2:+:156439440:156590099:Dlgap4:10:14	IR	E10,E14	E10,E11,E12,E13,E14	-0.836455	0.00917981	0.845635	2.88482e-05	0.0004965	0.203397	0.0895572	-0.113839
uc007uvl.1,uc007uvn.2,uc007uvo.2,uc007uvp.2,uc007uvq.2,uc007uvr.2,uc011zph.1:chr14:-:101841576:102008408:Tbc1d4::16-18-19-20-21-22-23-24>	AFE	E14,E16	E15,E16	-1.28972	1.33889	2.62861	2.92292e-05	0.000500811	0.838829	0.23206	-0.606769
uc007jzc.1,uc007jzd.1,uc007jze.1,uc007jzf.1:chr11:+:72420762:72499983:Ube2g1:<1:3-4.5-6-7-9>	ES	E1,E3	E1,E2,E3	2.72515	0.520525	-2.20463	3.10197e-05	0.000530306	0.0211342	0.165576	0.144442
uc009grv.1,uc009grw.1,uc009grx.1:chr7:-:52155742:52184860:Ap2a1:<1-3-4-5-6-7-8-9-10-11-12-13-14-15-16:18-19-20-21-22-23-24-25>	ES	E16,E18	E16,E17,E18	3.46379	1.60866	-1.85512	3.22336e-05	0.000549833	0.0240872	0.130724	0.106636
uc008rfm.1,uc008rfn.1,uc012cxc.1:chr3:-:123210469:123211254:BC025067,BC096391,Snora24:4:	ALE	E4,E5	E4,E6	-3.88445	-0.868168	3.01628	3.34691e-05	0.000568382	0.014455	0.242538	0.228083
uc007ghc.2,uc007ghd.2,uc007ghe.2,uc011xjf.1:chr10:+:80755716:80782719:Pip5k1c:<1-2-3-5-6-7-8-9-10-11-12-13-14-15-16-17:20>	ES	E17,E20	E17,E19,E20	1.44382	0.566912	-0.87691	3.36241e-05	0.000569754	0.149627	0.32357	0.173942
uc007zxy.1,uc007zxz.1,uc007zya.1,uc007zyb.2,uc012aii.1:chr16:+:91648068:91679437:Son,mKIAA1019:9-10:12	A5SS	E10,E12	E10,E11,E12	-0.889892	-1.86125	-0.971359	3.4149e-05	0.000577373	0.175976	0.357508	0.181532
uc009myv.1,uc009myw.1,uc009myx.1:chr8:+:98239812:98242904:Setd6:<1-2-3:7-8>	ES	E3,E7	E3,E4,E5,E6,E7	-1.78849	-4.53755	-2.74907	3.55323e-05	0.000599442	0.771325	0.989813	0.218489
uc008kvg.2,uc008kvh.2,uc008kvi.2,uc008kvj.2:chr2:-:91051738:91077223:Ddb2:<1-3:5	IR	E3,E5	E3,E4,E5	-0.501853	-1.98946	-1.48761	3.62109e-05	0.000609551	0.345612	0.710061	0.36445
uc008aei.2,uc008aej.2,uc008aek.1,uc008ael.1,uc008aem.1,uc008aen.1:chr17:+:3114971:3311120:AK049769,Rbm16,Scaf8:<1:3-4-5-6-7-8-9-10-11-12-13-14-15-16-17-18-19-20-21.22.23	ES	E1,E3	E1,E2,E3	1.87739	-0.2861	-2.16349	3.6613e-05	0.00061497	0.0955542	0.492153	0.396599
uc007jtw.1,uc007jtx.1,uc007jty.1:chr11:+:69980156:69984336:Clec10a:<1.2:4	IR	E2,E4	E2,E3,E4	-0.356507	0.93139	1.2879	3.697e-05	0.000619611	0.225051	0.0660609	-0.15899
uc007muo.2,uc007mup.2,uc007muq.1:chr11:+:120645585:120650416:Gps1:3-4-5-6-7-8-9-10-11-12-13-14:16>	IR	E14,E16	E14,E15,E16	0.824949	2.0934	1.26845	3.71546e-05	0.000620925	0.2408	0.0702037	-0.170596
uc009upy.1,uc009upz.1,uc009uqa.1,uc009uqb.1:chrX:+:148578810:148659779:Iqsec2:<3:5>	ES	E3,E5	E3,E4,E5	0.162937	-1.71183	-1.87477	3.72102e-05	0.000620925	0.375392	0.799838	0.424447
uc008rtm.1,uc008rtn.1,uc008rto.1,uc008rtp.1,uc012czm.1:chr3:+:152058436:152125790:Zzz3::7-8	AFE	E2,E4,E7	E6,E7	2.97748	-0.59467	-3.57215	3.75971e-05	0.00062602	0.99846	0.722989	-0.275471
uc009rrm.1,uc009rrn.1,uc009rro.1,uc009rrp.1,uc009rrq.1:chr9:+:108941140:108960280:Shisa5:5:7	IR	E5,E7	E5,E6	-1.30697	-0.204343	1.10263	3.82291e-05	0.000635166	0.790685	0.563565	-0.227121
uc007rsk.2,uc007rsl.1,uc007rsm.1,uc007rsn.1,uc011zed.1,uc011zee.1,uc011zef.1:chr13:-:104608865:104710594:Erbb2ip,mKIAA1225:<1-2-3-4-5-6-7-8-9-10-11-12-13-14-15-16-17-18-20-21-22:28-29-30>	ES	E22,E28	E22,E25	-3.36695	-0.908621	2.45832	3.85705e-05	0.000639453	0.900545	0.48654	-0.414005
uc008jbl.2,uc008jbm.2,uc008jbn.2:chr2:-:30028966:30033979:D2Wsu81e:4:6-7-8-9-10-11-12-13-14-15>	IR	E4,E6	E4,E5,E6	-0.750033	0.604222	1.35425	3.90556e-05	0.0006461	0.528058	0.200387	-0.327671
uc007aqc.1,uc007aqd.1,uc007aqe.1,uc007aqf.1:chr1:-:36480030:36502084:Lman2l:5:7-8-9-10>	ES	E5,E7	E5,E6,E7	-1.71585	-3.65905	-1.9432	3.99329e-05	0.000657669	0.813382	0.983221	0.169839
uc007fuj.1,uc007fuk.1,uc007ful.1,uc007fum.1:chr10:-:75813998:75905657:Pcnt::16-17-18-19-20-21-22-23-24-25-26-27-28-29-30-31-32-33-35-36-37-38-39-40-41-42-43-44-45>	AFE	E14,E16	E8,E9,E10,E11,E12,E13,E16	-4.69544	-1.42573	3.26971	3.98853e-05	0.000657669	0.977105	0.401253	-0.575853
uc008tgf.1,uc008tgg.1,uc008tgh.1,uc008tgi.1,uc008tgj.1,uc008tgk.1,uc008tgl.1,uc008tgm.1,uc008tgn.1,uc008tgo.1,uc008tgp.1:chr4:-:63075943:63156985:Whrn,mKIAA1526::9-10	AFE	E1,E2,E3,E4,E5,E7,E9	E8,E9	1.02065	3.31419	2.29354	4.00119e-05	0.000657669	0.402685	0.85677	0.454085
uc008bef.1,uc008beg.1:chr17:+:26698456:26793878:Ergic1::5-6-7-8-9-10	AFE	E1,E2,E3,E5	E4,E5	2.96658	0.602732	-2.36385	4.01581e-05	0.000658661	0.993273	0.771369	-0.221905
uc007xlr.2,uc007xls.2,uc007xlt.2,uc007xlu.2:chr15:-:97871659:97923836:Senp1::3-4-5-7-8-9-10-11	AFE	E1,E3	E2,E3	2.08232	-0.713235	-2.79555	4.03921e-05	0.000661087	0.0357957	0.401609	0.365813
uc008lfv.2,uc008lfw.2,uc012bzr.1,uc012bzs.1:chr2:-:93041916:93174644:Tspan18:<1:3	ES	E1,E3	E1,E2,E3	2.20946	-0.0686534	-2.27811	4.05114e-05	0.000661629	0.0287726	0.313139	0.284366
uc008yhu.2,uc008yhv.2:chr5:-:101083744:101103275:Coq2:<1:3-4-5-6-7>	ES	E1,E3	E1,E2,E3	-0.808082	-3.28469	-2.47661	4.13175e-05	0.000673362	0.597346	0.970495	0.373149
uc009gtn.2,uc009gto.2,uc009gtp.1,uc009gtq.1:chr7:-:52386558:52391802:Flt3l::3	AFE	E1,E3	E2,E3	-0.0755543	-1.43763	-1.36207	4.17398e-05	0.000678803	0.230409	0.525405	0.294995
uc009nmt.2,uc009nmu.2,uc009nmv.1,uc009nmw.2:chr8:-:114234374:114267749:Bcar1::3	AFE	E1,E3	E2,E3	1.473	-0.0377403	-1.51074	4.25226e-05	0.000688615	0.269646	0.617666	0.348019
uc009cip.1,uc009ciq.1:chr6:-:72382792:72389552:Mat2a:<1-2-3-4-5-6-7-8:10>	IR	E8,E10	E8,E9,E10	0.70899	-0.489268	-1.19826	4.26934e-05	0.000689925	0.192549	0.317708	0.125158
uc008vak.2,uc008val.2,uc008vam.2,uc008van.2,uc008vao.1,uc012dma.1,uc012dmb.1,uc012dmc.1:chr4:-:131479340:131631228:Epb4.1::4	AFE	E2,E4	E3,E4	-3.53125	-0.864997	2.66625	4.41078e-05	0.000710664	0.99626	0.885082	-0.111178
uc008rpl.2,uc008rpm.1,uc008rpo.2,uc012cyw.1:chr3:-:143851493:143868219:Lmo4::5-7-8-9>	AFE	E1,E5	E2,E3,E5	0.103412	1.25849	1.15508	4.44284e-05	0.000713457	0.722171	0.517985	-0.204186
uc008icw.1,uc008icx.1,uc008icy.1,uc012bon.1:chr1_random:-:299583:342913:Mia3,mKIAA0268::9-11-12-13-14-15-16-17-18-19-20-21-22-23-24-25-26-27-28-29-30>	AFE	E6,E7,E9	E8,E9	-1.42083	0.589678	2.0105	4.52207e-05	0.000724664	0.136609	0.542023	0.405414
uc009gun.2,uc009gup.2,uc009guq.1,uc012fke.1,uc012fkf.1:chr7:-:52558524:52589150:Trpm4:6-7-8-9-10-11-12-13-14-15-16-17.18-19-20-21:23.24-25-26-27-28>	ES	E21,E23	E21,E22,E23	-0.913139	-3.37987	-2.46673	4.56222e-05	0.000729575	0.59399	0.956505	0.362515
uc008stw.1,uc008stx.1,uc008sty.1,uc012ddt.1,uc012ddu.1:chr4:-:46506652:46549016:Trim14,pub:<1-3-4-5-7:	ALE	E7,E10	E7,E9	-2.44558	-0.137306	2.30828	4.67268e-05	0.00074453	0.0226552	0.214978	0.192323
uc009kwf.1,uc009kwg.1,uc009kwh.1,uc009kwj.2,uc012fzr.1:chr8:+:12757015:12868728:Atp11a:<1-2-3-4-5-6-7-8-9-10-12-13-14-15-16-17-18-19-20-21-22-23-24-25-26-27-28-29:34>	ME	E29,E31,E34	E29,E33,E34	-1.66057	-0.703098	0.95747	4.67514e-05	0.00074453	0.168605	0.355403	0.186799
uc009myi.2,uc009myj.2,uc012gir.1:chr8:-:97944149:97958769:Gtl3:6:8>	IR	E6,E8	E6,E7,E8	0.577444	2.11885	1.5414	4.8058e-05	0.000763754	0.179763	0.0349618	-0.144801
uc009fig.1,uc009fih.1,uc009fii.1:chr7:+:17428282:17455810:Prkd2::3-5-6-7-8-9-10-12-13-14-15-16-17-18-19-20-21-22>	AFE	E1,E3	E2,E3	0.948911	-1.37498	-2.32389	4.95793e-05	0.000786304	0.0842208	0.449534	0.365313
uc007fyv.1,uc007fyw.1,uc007fyx.1,uc007fyy.1:chr10:-:79002989:79017836:Mier2:<1-2:4-5-6.7-8-9-10-11-12-13-14	A3SS	E2,E4	E2,E3,E4	1.25091	0.0409103	-1.21	5.01884e-05	0.000794322	0.131813	0.348016	0.216204
uc008bef.1,uc008beg.1:chr17:+:26698456:26793878:Ergic1:5-6-7-8-9-10:	ALE	E10,E11	E10,E12	-4.06831	-1.91819	2.15012	5.04477e-05	0.000796784	0.0124277	0.102695	0.0902674
uc007fxv.2,uc007fxw.1,uc007fxx.1,uc007fxy.2,uc007fxz.1,uc007fya.2,uc011xhu.1:chr10:+:78037244:78047247:Ilvbl:20:22>	IR	E20,E22	E20,E21,E22	0.58053	1.60586	1.02532	5.11548e-05	0.00080502	0.291237	0.124748	-0.16649
uc008tid.1,uc008tie.1,uc008tif.2,uc008tih.2,uc008tii.2,uc008tij.2,uc008tik.2,uc008til.2,uc012dgc.1,uc012dgd.1:chr4:-:71778175:71861953:Tle1:11:	ALE	E11,E12	E11,E14,E16,E17,E18,E19,E20,E21,E22,E23,E24,E25,E26,E27,E28	1.20156	-0.189859	-1.39142	5.12838e-05	0.00080502	0.940248	0.784338	-0.155911
uc009pgt.1,uc009pgu.1,uc009pgv.1,uc009pgw.1,uc012gsk.1:chr9:-:45745957:45763332:Sidt2:<1-2-3-4-6-7-8-9-10-11:13-14	ES	E11,E13	E11,E12,E13	0.544382	1.24704	0.70266	5.11871e-05	0.00080502	0.308659	0.169577	-0.139082
uc007tlq.1,uc007tlr.1,uc011zjx.1:chr14:+:51427620:51440975:Parp2:<1-2-3-4-5:7	IR	E5,E7	E5,E6,E7	-2.14376	0.0258479	2.1696	5.27615e-05	0.000826524	0.825221	0.279681	-0.54554
uc008akb.2,uc008akc.2,uc008ake.2,uc012ajv.1:chr17:-:10399335:10512226:Qk:<1-2-3-4-5-6:8	A3SS	E6,E8	E6,E7,E8	2.01909	-0.290811	-2.3099	5.34505e-05	0.000835614	0.0227755	0.179699	0.156924
uc008qhl.2,uc008qhm.2,uc008qhn.2:chr3:+:94778652:94810765:Pi4kb:<1:4-5-6-7-8-9-10-11-12>	ES	E1,E4	E1,E2	-2.50611	-1.40877	1.09734	5.39203e-05	0.000839538	0.717453	0.487976	-0.229477
uc008yqw.1,uc012ebb.1,uc012ebc.1:chr5:-:110790770:110877522:2410025L10Rik,Fbrsl1::7	AFE	E1,E2,E3,E4,E5,E7	E6,E7	0.499956	1.49995	0.999998	5.38587e-05	0.000839538	0.281447	0.52765	0.246203
uc007hhj.2,uc011xph.1,uc011xpj.1:chr10:+:126415772:126437031:Ctdsp2::9-10-11>	AFE	E1,E2,E3,E4,E5,E6,E7,E9	E8,E9	2.28798	4.20218	1.9142	5.42502e-05	0.000842964	0.737083	0.954047	0.216964
uc009hzo.1,uc009hzp.1,uc009hzq.1,uc009hzr.1:chr7:+:87331726:87371410:Sema4b,mKIAA1745::3-4-5-7-8-9-10-11-12-13-14-15-17-18>	AFE	E1,E3	E2,E3	-0.191891	1.70475	1.89664	5.48232e-05	0.000850147	0.70245	0.124922	-0.577529
uc008mja.2,uc008mjb.2,uc012cef.1,uc012ceg.1:chr2:+:130250055:130270005:Vps16,mVps16:9:11	IR	E9,E10,E11	E9,E11	-1.71398	-0.687336	1.02665	5.56227e-05	0.000860805	0.067032	0.172414	0.105382
uc007plm.2,uc007pln.2,uc007plo.2,uc011ywf.1,uc011ywg.1,uc011ywh.1:chr13:-:12531681:12557209:Lgals8:<2:4-5-6-7	A5SS	E2,E4	E2,E3,E4	-2.61475	-0.618115	1.99663	5.59794e-05	0.000864583	0.931662	0.550041	-0.381621
uc007qqd.1,uc007qqe.1,uc007qqf.1,uc007qqg.1,uc007qqh.1,uc007qqi.1,uc007qqj.1:chr13:+:55311142:55419686:AK053386,Nsd1::6	AFE	E2,E6	E4,E6	-0.862923	-2.88741	-2.02449	5.6952e-05	0.000877839	0.824881	0.975258	0.150377
uc009aub.2,uc009auc.2,uc009aud.2,uc009aue.2:chr5:-:151374217:151397100:N4bp2l1:<1:	ALE	E1,E2,E3,E4	E1,E6	-0.84725	0.891397	1.73865	5.74564e-05	0.000883767	0.0436478	0.278672	0.235025
uc009knj.2,uc009knk.2,uc009knl.2,uc009knm.2,uc009knn.2,uc009kno.2,uc009knp.2,uc009knq.2,uc009knr.2,uc009kns.2,uc009knt.2,uc009knu.2,uc009knv.2,uc009knw.2,uc009knx.2,uc012fxm.1:chr7:+:149684740:149701914:Tnnt3:5:8	ES	E5,E8	E7,E8	-2.06594	-0.801046	1.26489	5.75669e-05	0.000883767	0.86719	0.67026	-0.196929
uc009rri.1,uc009rrj.1,uc009rrk.1,uc012hay.1,uc012haz.1,uc012hba.1:chr9:+:108893946:108934739:Pfkfb4::15-16-17.18-19-20-21-22>	AFE	E14,E15	E2,E3,E7,E8,E9,E10,E11,E12,E13,E15	-0.792239	-3.03972	-2.24748	5.77543e-05	0.000884874	0.369097	0.75564	0.386543
uc007yhv.1,uc007yhw.1:chr16:-:15848533:15863462:Mzt2:<1.2:4-5-6>	IR	E2,E4	E2,E3,E4	-1.30642	-3.20496	-1.89855	5.85532e-05	0.00089353	0.644535	0.933693	0.289159
uc009rfg.2,uc009rfh.2,uc009rfi.1,uc009rfj.1:chr9:-:101007319:101154162:Ppp2r3a::4-6-7-8-9-10-11-12-13-14-15	AFE	E1,E2,E4	E3,E4	2.85158	-0.677901	-3.52948	5.86685e-05	0.00089353	0.792532	0.105278	-0.687254
uc008kho.1,uc008khp.1,uc008khq.1,uc008khr.1:chr2:+:80457370:80471818:Dusp19,SKRP1:4:7-8>	A3SS	E4,E7	E4,E6,E7	-0.370811	-1.98481	-1.614	5.90672e-05	0.000897822	0.503166	0.839694	0.336528
uc008rop.1,uc008roq.1,uc008ror.1,uc008rox.1,uc012cyv.1:chr3:+:142159897:142282140:Gbp1,Gbp5:<1-2-3-4-5.6-7-8-9-10-11:	ALE	E11,E12	E11,E13	-0.186978	-2.94618	-2.7592	5.96202e-05	0.000902652	0.56475	0.0484264	-0.516323
uc009jgl.2,uc009jgm.2,uc009jgn.2,uc009jgo.2,uc009jgp.1:chr7:+:119369349:119498708:Mical2:25-27-28:30.31>	IR	E28,E30	E28,E29,E30	-20	-0.977894	19.0221	6.04067e-05	0.000912759	1	0.315714	-0.684286
uc008rps.1,uc008rpt.1,uc008rpv.1,uc008rpw.1:chr3:-:144346641:144383287:Sh3glb1:11:	ALE	E11,E12	E11,E13	-0.714204	1.45872	2.17292	6.10155e-05	0.000920096	0.25394	0.743316	0.489376
uc009cor.1,uc009cos.1,uc009cot.1,uc009cou.1,uc009cov.1,uc009cow.1:chr6:+:83958583:84161036:Dysf::3-4-5-6	AFE	E1,E3	E2,E3	-2.99793	-0.946074	2.05185	6.11319e-05	0.000920096	0.976316	0.839836	-0.13648
uc007mnw.2,uc007mnx.2,uc007mny.2,uc007moa.2,uc007mob.2,uc007moc.1:chr11:+:117670980:117701222:Afmid,Clast2,Syngr2:<9.10:12-13-14-15-16-17-18	IR	E10,E12	E10,E11,E12	-0.00469967	1.84348	1.84818	6.22747e-05	0.000935461	0.428377	0.0835421	-0.344835
uc008cvr.1,uc008cvs.1,uc008cvt.1,uc008cvu.1,uc008cvv.1,uc008cvw.1:chr17:+:47748544:47821016:Med20,Usp49::8	AFE	E1,E2,E8	E7,E8	4.5748	2.41678	-2.15803	6.26423e-05	0.000939145	0.990751	0.907915	-0.0828361
uc008ruf.2,uc008rug.2,uc008rui.2,uc012czq.1,uc012czr.1,uc012czs.1,uc012czt.1:chr3:-:153570252:153575957:Rabggtb:5-7-8:10-11	ES	E8,E10	E8,E9,E10	0.428358	1.82027	1.39192	6.42211e-05	0.000957386	0.34294	0.0830148	-0.259925
uc008ztb.1,uc008ztc.1,uc008ztd.1,uc008zte.1:chr5:+:130221402:130224566:MRPS17,Mrps17:5:	ALE	E5,E6	E5,E7,E8	-0.938003	-1.9758	-1.0378	6.42332e-05	0.000957386	0.919881	0.800984	-0.118897
uc007lej.2,uc007lek.2,uc011ydv.1:chr11:+:97546909:97549939:Cisd3::4-5-6>	AFE	E1,E4	E3,E4	-1.50023	-3.92952	-2.42929	6.46885e-05	0.000962304	0.843626	0.989011	0.145385
uc007zfi.2,uc007zfj.2,uc007zfk.2,uc007zfl.2:chr16:+:38742376:38769158:B4galt4:<2:4-5-6-8	A5SS	E2,E4	E2,E3,E4	1.65456	0.405465	-1.24909	6.57874e-05	0.000971123	0.132613	0.322473	0.18986
uc008qwa.1,uc008qwb.1,uc012cvr.1:chr3:+:106285348:106303972:Dennd2d::4-5-6-7-8-9-10-11-12-13-14>	AFE	E1,E4	E3,E4	-0.132859	-1.60924	-1.47638	6.57795e-05	0.000971123	0.544258	0.826254	0.281997
uc009grj.1,uc009grk.1,uc009grl.1:chr7:-:52118437:52125158:Ptov1:<1-2-3-4-5-6-7:9-10-11-12-13	IR	E7,E9	E7,E8,E9	1.43755	2.40628	0.968737	6.562e-05	0.000971123	0.146609	0.0569594	-0.0896492
uc009qsd.1,uc009qse.1,uc009qsf.1:chr9:-:75234707:75257821:Mapk6::3-4-6-7-8>	AFE	E1,E3	E2,E3	1.93491	0.588863	-1.34605	6.5748e-05	0.000971123	0.119478	0.325419	0.20594
uc008kdc.1,uc008kdd.1,uc008kde.1,uc008kdf.1,uc008kdg.1,uc008kdh.1,uc008kdi.1,uc008kdj.1,uc008kdk.1,uc008kdl.1:chr2:-:73654578:73730685:Atf2:8-9:13-15-16	ES	E9,E10,E11,E13	E9,E13	1.13434	3.08211	1.94777	6.61789e-05	0.000975027	0.56275	0.953537	0.390787
uc008zvt.1,uc008zvu.1,uc008zvv.1,uc008zvw.1,uc008zvx.1,uc008zvy.1,uc008zvz.1,uc008zwa.1,uc008zwb.1,uc008zwc.1,uc008zwd.1,uc008zwe.1,uc008zwf.1,uc008zwg.1,uc008zwh.1,uc012eee.1:chr5:-:134833530:134932581:Gtf2ird1::3-4-5-6-7	AFE	E1,E3	E2,E3	0.272583	-1.57511	-1.84769	6.86401e-05	0.00100742	0.519779	0.886769	0.366991
uc009ezt.2,uc009ezu.2,uc009ezv.2,uc009ezw.2:chr7:+:5013783:5031541:U2af2:<1-2-3-4-5:8-9-10-11-12	A3SS	E5,E8	E5,E6,E7,E8	2.21287	0.857975	-1.35489	6.9042e-05	0.00101139	0.0276338	0.0998057	0.072172
uc008gfe.1,uc008gff.1,uc008gfg.1:chr19:+:5740903:5758532:Ltbp3:6-7-8-10-11-12-13-14-15-16-17-18-19-20-21-22:	ALE	E22,E23	E22,E24,E25,E26,E27,E28,E29,E30,E31,E32	-3.35421	-1.82587	1.52834	6.94292e-05	0.00101512	0.138614	0.447439	0.308824
uc009hhz.2,uc009hia.2,uc009hib.2,uc009hic.2,uc009hid.2,uc012fmv.1:chr7:+:74367429:74373354:Lysmd4:<1.2:	ALE	E2,E3	E2,E4,E9	-0.257462	-2.61038	-2.35292	6.97408e-05	0.00101581	0.808985	0.296155	-0.51283
uc007dbk.2,uc007dbl.2,uc011wtw.1:chr1:+:157405249:157534363:Acbd6:<1-2-3:	ALE	E3,E4	E3,E6,E7,E8,E9,E10	-0.0432496	-1.84378	-1.80053	7.09342e-05	0.00103123	0.853703	0.483492	-0.370212
uc007wkh.1,uc007wki.1,uc007wkj.1,uc007wkk.1,uc007wkl.1,uc011zuv.1:chr15:+:76307874:76331402:Hsf1:14:16-17.18>	IR	E14,E16	E14,E15,E16	0.40328	1.35566	0.952379	7.14004e-05	0.00103409	0.339491	0.16591	-0.173581
uc008nth.2,uc008nti.2,uc008ntj.2,uc008ntk.1,uc012ciw.1:chr2:+:163484121:163551894:Pkig::4	AFE	E1,E2,E4	E3,E4	-0.99398	1.17544	2.16942	7.13441e-05	0.00103409	0.385368	0.853596	0.468228
uc009mek.2,uc009mel.2,uc009mem.2,uc009men.1,uc009mep.2,uc009meq.2:chr8:+:74200281:74214476:Insl3,Jak3:11-12:14-15-16	IR	E12,E14	E12,E13,E14	0.748439	1.71509	0.966651	7.31205e-05	0.00105701	0.249618	0.114774	-0.134844
uc008dcj.2,uc008dck.2,uc012avv.1:chr17:+:56724404:56745717:Safb:10:12-13-14-15-16-17-18-19-20-21-22-23-24-25>	IR	E10,E12	E10,E11,E12	1.1112	-0.320795	-1.432	7.34881e-05	0.00106	0.113052	0.343014	0.229962
uc009lud.1,uc009lue.1,uc009luf.1,uc009lug.1,uc009luh.1,uc009lui.1:chr8:-:63992040:64381487:Palld:14.15-16-17:19-20-21-22-23-24-25-27>	ES	E17,E19	E17,E18,E19	1.45424	-0.222818	-1.67705	7.37933e-05	0.00106074	0.164854	0.472965	0.308111
uc009gpq.2,uc012fjp.1:chr7:-:51745307:51751883:2310044H10Rik:<1-2-3-4-5-6:8>	ES	E6,E8	E6,E7,E8	0.753676	2.02844	1.27476	7.5059e-05	0.00107692	0.240473	0.0758453	-0.164627
uc009aip.1,uc009aiq.1,uc009air.1,uc012ege.1:chr5:+:142939884:142954669:C330006K01Rik:<1-2-3-4-5-6-7-8:10.11	IR	E8,E10	E8,E9,E10	0.0606628	1.13922	1.07856	7.53588e-05	0.00107921	0.421611	0.20535	-0.216261
uc009pkb.1,uc009pkc.2,uc009pkd.1,uc009pke.1,uc009pkf.2,uc009pkg.2,uc009pkh.1:chr9:-:50470857:50547552:Dixdc1:<3-4:	ALE	E4,E5	E4,E7,E8,E9,E11,E13,E14,E15,E16,E17,E18	-0.890032	-3.33408	-2.44405	7.60514e-05	0.0010871	0.818628	0.189417	-0.629211
uc007ryw.1,uc007ryx.1,uc007ryy.1,uc007ryz.1,uc007rza.1,uc007rzb.1:chr13:-:120123123:120197945:Nnt:<1:3-4-6-8-9>	ES	E1,E3	E1,E2,E3	-1.01727	-3.66356	-2.64629	7.6857e-05	0.00109657	0.605009	0.956734	0.351726
uc007nyi.2,uc007nyj.2,uc007nyk.2,uc007nym.1,uc007nyn.2,uc011yod.1:chr12:+:77634546:77680026:Plekhg3::20	AFE	E1,E2,E3,E5,E6,E7,E8,E9,E10,E11,E12,E14,E20	E17,E18,E19,E20	0.295841	1.19	0.894159	7.72459e-05	0.00110007	0.391638	0.219494	-0.172144
uc009dam.2,uc009dan.2,uc009dao.2,uc009dap.2,uc009daq.2:chr6:-:97133809:97155636:Uba3:2:4-5-6-7-8-9-10-11-12-13-14-15-16-18-19-20>	A5SS	E2,E4	E2,E3,E4	0.143415	1.9807	1.83729	7.8653e-05	0.00111804	0.35004	0.0352793	-0.31476
uc009ela.2,uc009elb.2:chr6:+:134870418:134875543:Cdkn1b:<1-2:	ALE	E2,E3	E2,E4	1.54247	-0.885198	-2.42767	8.06504e-05	0.00114431	0.704124	0.189056	-0.515068
uc007hhp.1,uc007hhq.1,uc007hhr.1:chr10:+:126478987:126482517:Mettl1:<1-2:	ALE	E2,E3	E2,E4,E5,E7,E8	-1.87721	-3.7445	-1.86729	8.15596e-05	0.00115508	0.102642	0.0152765	-0.0873656
uc007nqd.2,uc007nqe.2,uc007nqf.2,uc007nqg.2,uc007nqh.1,uc007nqi.2,uc011ymd.1:chr12:+:60230732:60291207:Ctage5:8-9-10-11-12-13-14-15-16-17.18-19-20-21:23-24-25-26-27>	ES	E21,E23	E21,E22,E23	-4.41003	-2.26081	2.14922	8.21002e-05	0.00116059	0.987869	0.875371	-0.112498
uc007lco.2,uc007lcq.2,uc007lcr.2,uc007lcs.1,uc011ydl.1,uc011ydm.1,uc011ydn.1:chr11:-:96678727:96691282:Nfe2l1::3-6.7-8-9.10.11.12>	AFE	E1,E3	E2,E3	0.391792	-1.92405	-2.31584	8.27069e-05	0.00116507	0.52104	0.925431	0.404391
uc007mfk.1,uc007mfl.1:chr11:+:114529856:114533645:Rpl38:<1:3-4-5-6>	A5SS	E1,E3	E1,E2,E3	1.17605	2.20418	1.02814	8.27203e-05	0.00116507	0.224713	0.0904143	-0.134299
uc008jbz.1,uc008jca.1,uc008jcb.1:chr2:+:30141952:30199782:Nup188:<1-2-3-4-5-6.7:	ALE	E7,E8	E7,E9,E10,E11,E12,E13,E14,E15,E16,E17,E18,E19,E20,E21,E22,E23,E24,E25,E27,E28,E29,E30,E31,E32,E33,E34,E35,E36,E37,E38,E39,E40,E41,E42,E43,E44,E45,E46,E47	-0.276	-2.22395	-1.94796	8.33876e-05	0.00117231	0.960831	0.775576	-0.185255
uc007qqw.1,uc007qqx.2,uc007qqy.2,uc007qra.2,uc011yzs.1,uc011yzt.1:chr13:+:55546432:55562288:GRK6,Grk6:12.13-14-15-16-17-18-19:21>	ES	E19,E21	E19,E20,E21	-0.716976	0.446727	1.1637	8.36373e-05	0.00117367	0.504813	0.26464	-0.240173
uc008wsf.1,uc008wsg.1,uc012dti.1:chr5:+:24191632:24216373:Nub1:3-4-5:	ALE	E5,E6	E5,E7,E8,E9,E10,E11,E12,E13,E14,E15,E16,E17	-0.627766	-2.94791	-2.32015	8.49383e-05	0.00118976	0.561987	0.0539249	-0.508062
uc007lff.2,uc007lfg.1,uc007lfh.2,uc007lfi.2,uc011ydz.1:chr11:-:97864214:97883941:Cacnb1::4-5-6-7-8-10.11-12-13-14-15-16	AFE	E1,E2,E4	E3,E4	0.825973	-1.18993	-2.0159	8.58653e-05	0.00119974	0.457406	0.0575659	-0.399841
uc009mzg.1,uc009mzh.1:chr8:-:98359822:98377408:Slc38a7:<1.2:5-6-7-8-9-10-11-12-13-14>	ES	E2,E5	E2,E4,E5	-0.229875	-1.62975	-1.39987	8.59635e-05	0.00119974	0.458229	0.727339	0.26911
uc008gkq.1,uc008gkr.1,uc008gks.1,uc008gkt.1:chr19:-:7349885:7416334:Mark2:<1-3-4-5-6-7-8-9-10-11-12-13-14-15:17	ES	E15,E17	E15,E16,E17	0.0812931	0.880278	0.798985	8.62685e-05	0.00120181	0.352716	0.2004	-0.152316
uc008haw.2,uc008hax.2:chr19:-:24994405:25036106:Cbwd1:<1:3-4-5-6-7-8-9-10-11-12-13-14-15-16>	A5SS	E1,E3	E1,E2,E3	-0.627508	1.1001	1.72761	8.64878e-05	0.00120268	0.594301	0.168696	-0.425604
uc009dky.1,uc009dkz.1,uc009dla.1,uc009dlb.2:chr6:+:117791259:117795974:Zfp637::3.4	AFE	E1,E3	E2,E3	-1.16643	0.870828	2.03726	8.6811e-05	0.00120499	0.431382	0.094951	-0.336431
uc008ozw.2,uc008ozx.2,uc008ozy.1,uc008ozz.1,uc008paa.1,uc008pab.2,uc008pac.2,uc008pad.2,uc008pae.1:chr3:+:36762027:36951955:4932438A13Rik,Kiaa1109,mKIAA1109:72-73-74-75:78-79-80-81	ES	E75,E78	E75,E76,E78	1.09861	-0.510826	-1.60944	8.74359e-05	0.00120929	0.154115	0.628454	0.474338
uc009joa.1,uc009job.1,uc009joc.1,uc009jod.1:chr7:-:129130235:129164712:Gga2,mKIAA1080::10-11-12-13-14-15-16-17-18-19>	AFE	E1,E2,E3,E4,E5,E7,E8,E10	E9,E10	0.651153	2.24254	1.59139	8.73074e-05	0.00120929	0.445272	0.81239	0.367118
uc009olj.1,uc009olk.1,uc009oll.1,uc009olm.1,uc009oln.1:chr9:+:21229388:21312198:Dnm2:13-14-15:17-18-19-20-21-22	ES	E15,E17	E15,E16,E17	-1.14881	-0.216183	0.932626	8.96583e-05	0.0012378	0.760527	0.537672	-0.222855
uc008cbt.2,uc008cbu.2,uc008cbv.2,uc012apt.1,uc012apu.1:chr17:+:34324500:34334170:Tap1:7:9	IR	E7,E9	E7,E8,E9	1.35792	0.450553	-0.907365	9.15334e-05	0.00126142	0.0730681	0.154463	0.0813948
uc008hbn.1,uc008hbq.1,uc008hbr.1,uc012bjw.1,uc012bjx.1:chr19:+:26679649:26852811:Smarca2::35-36-37-38-39-40>	AFE	E1,E2,E3,E4,E5,E6,E7,E8,E9,E10,E11,E12,E13,E14,E15,E16,E17,E18,E19,E20,E21,E22,E23,E24,E26,E27,E28,E30,E31,E35	E32,E33,E35	3.18962	1.61624	-1.57338	9.20744e-05	0.0012666	0.381468	0.727066	0.345598
uc007zwa.1,uc007zwb.1,uc007zwc.1,uc007zwd.1,uc007zwe.1,uc007zwf.1,uc007zwg.1:chr16:-:90229384:90284670:Scaf4,Srsf15:26:	ALE	E26,E27	E26,E28	-5.4245	-2.32734	3.09716	9.25976e-05	0.00127152	0.0140975	0.304952	0.290855
uc009maj.1,uc009mak.1:chr8:+:73017054:73027980:CRLM3,Crlf1:<7:10>	ES	E7,E10	E7,E9,E10	-1.04982	0.362905	1.41273	9.35668e-05	0.00128253	0.708356	0.362405	-0.345951
uc007sra.1,uc007srb.1,uc007src.1,uc007srd.1,uc007sre.1:chr14:+:25309902:25315368:Rps24:7:9	IR	E7,E9	E7,E8,E9	-1.75705	0.160193	1.91724	9.38233e-05	0.00128376	0.483089	0.134962	-0.348127
uc009djs.2,uc009djt.1,uc009dju.1,uc012eqv.1:chr6:+:116158050:116212689:D6Wsu116e:<1.2:4-6-7-8-9-10-11-12-13-14-15-16-17-18-19-20-21-22-23-24-25-26-27-28-29.30-31-32-33-34-35>	IR	E2,E4	E2,E3,E4	1.09175	0.309161	-0.782588	9.58794e-05	0.00130956	0.205944	0.35407	0.148126
uc008fyr.1,uc008fys.1,uc008fyt.1,uc008fyu.1,uc008fyv.1,uc012bgd.1:chr19:+:4125959:4132307:Tmem134:4.5-6:9-10>	ES	E6,E9	E6,E8,E9	0.133108	0.891539	0.758432	9.6467e-05	0.00131524	0.421356	0.250407	-0.170949
uc007gea.2,uc007geb.2:chr10:+:80085524:80103516:Csnk1g2:<1-3-4-5:7-8-9-10-11-12-13-14>	IR	E5,E7	E5,E6,E7	1.14402	2.11184	0.967824	9.76443e-05	0.00132893	0.18049	0.0752426	-0.105248
uc007dbx.2,uc007dby.2,uc007dca.2,uc007dcb.2,uc007dcc.2,uc011wub.1,uc011wuc.1:chr1:+:157882793:157915989:Ifrg15,Tor1aip2:<5:7	ES	E5,E7	E5,E6	1.79357	0.30372	-1.48985	9.85479e-05	0.00133886	0.121479	0.360611	0.239132
uc008bab.1,uc008bac.1,uc008bad.1,uc008bae.1:chr17:-:25371261:25377061:Gnptg:<1-2:4-5-7-8-10-11-12-13-14>	IR	E2,E4	E2,E3,E4	1.41374	2.73134	1.3176	9.96864e-05	0.00135193	0.154407	0.041542	-0.112865
uc009okz.2,uc009ola.2,uc012gpf.1:chr9:+:21125162:21159472:Slc44a2::3-4-5-6-7-8-9-10-11-12-13-14-15-16-17-18.19-20-21-22-23-24>	AFE	E1,E3	E2,E3	3.33177	1.05581	-2.27596	0.000100076	0.00135482	0.0138601	0.263518	0.249658
uc008bql.2,uc008bqm.2,uc008bqn.2,uc008bqo.2,uc012aof.1:chr17:+:28450474:28463519:Fance:5:7-8-9	A3SS	E5,E7	E5,E6,E7	0.523422	-0.818396	-1.34182	0.000100963	0.0013628	0.334158	0.667382	0.333224
uc008qvo.1,uc008qvp.1:chr3:+:105762415:105772678:Wdr77:<1-2-3-4-5-6-7-8:10-11>	IR	E8,E10	E8,E9,E10	1.05811	2.19869	1.14058	0.000101021	0.0013628	0.102234	0.0359482	-0.0662862
uc007wbw.2,uc007wbx.2,uc007wby.2,uc007wbz.2,uc007wca.1,uc007wcb.1,uc007wcc.1,uc007wcd.1,uc011ztu.1:chr15:-:73035534:73253710:FAK,Ptk2:<2-3:	ALE	E3,E6	E3,E8,E9,E10,E11,E12,E14,E15,E16,E17,E18,E19,E20,E23,E25,E26,E27,E28,E29,E30,E31,E32,E33,E34,E35,E36,E37,E38	-0.911619	-4.36762	-3.456	0.000101522	0.00136716	0.80773	0.0632327	-0.744497
uc009ijj.2,uc009ijk.2,uc009ijl.2,uc012fpj.1,uc012fpk.1:chr7:-:104698840:104728007:1810020D17Rik:3:5>	ES	E3,E5	E3,E4,E5	-0.473886	-1.74551	-1.27162	0.000103599	0.00139026	0.553182	0.8307	0.277519
uc008hkm.1,uc008hkn.1,uc008hko.1,uc008hkp.1,uc008hkq.1,uc008hkr.1,uc008hks.1,uc008hkt.1,uc008hku.1,uc008hkv.1:chr19:-:40366529:40588302:Sorbs1,mKIAA1296:<1.2-5-6-7:9-12	ES	E7,E9	E7,E8,E9	2.15054	0.528764	-1.62178	0.000103921	0.00139215	0.073059	0.268216	0.195157
uc007lsk.2,uc007lsl.2,uc007lsm.2,uc007lsn.2:chr11:-:102660791:102681000:Gjc1::5-6>	AFE	E1,E5	E2,E5	-2.02166	-0.0991314	1.92253	0.000104947	0.00140343	0.870555	0.507679	-0.362876
uc007bmq.1,uc007bmr.1:chr1:+:74634934:74639017:Bcs1l:<1.2:4-5-6-7-8-9-10>	A5SS	E2,E4	E2,E3,E4	-0.311436	0.769133	1.08057	0.000106124	0.00141597	0.493883	0.249392	-0.244491
uc007xfs.1,uc007xft.1:chr15:-:89012642:89026905:Fam116b:<1-2-3-4-5-6-7-8-9-10-11:13-14-15-16-17-18-19-20-21>	A3SS	E11,E13	E11,E12,E13	-1.84159e-10	-1.71765	-1.71765	0.000106253	0.00141597	0.452698	0.81706	0.364362
uc007xne.1,uc007xnf.1,uc007xng.1:chr15:-:98475937:98493320:Ddx23:9:11-12-13-14-15-16-17	IR	E9,E10,E11	E9,E11	-0.303557	-1.71315	-1.40959	0.000106498	0.00141678	0.344801	0.0453058	-0.299496
uc009lxs.1,uc009lxt.1,uc009lxu.1:chr8:+:72332585:72345769:Gmip:<1-2-4-5-6-7-8-9-10-11-12-13-14-15-16-17-18-19-20:	ALE	E20,E21	E20,E22,E23	-2.14363	-0.42432	1.71931	0.000107494	0.00142755	0.152766	0.457014	0.304247
uc009qwc.2,uc009qwd.2,uc009qwe.2:chr9:-:83003548:83040214:Hmgn3:6:8>	IR	E6,E8	E6,E7,E8	-2.27727	-0.563469	1.7138	0.000110285	0.00146209	0.631383	0.312633	-0.31875
uc007mmh.1,uc007mmi.1,uc007mmj.1,uc011yid.1,uc011yie.1,uc011yif.1:chr11:-:116698745:116704763:Jmjd6,mKIAA0585:9:	ALE	E9,E10	E9,E11,E12	-0.489271	-1.65942	-1.17015	0.000110934	0.00146815	0.422507	0.18775	-0.234756
uc008nnr.1,uc008nnt.1,uc008nnu.1,uc008nnv.1,uc012chu.1,uc012chv.1:chr2:+:156439440:156590099:Dlgap4::10	AFE	E8,E10	E9,E10	1.45308	-0.283007	-1.73608	0.000113216	0.00149578	0.0310135	0.144158	0.113144
uc008cup.2,uc012aus.1,uc012aut.1,uc012auu.1:chr17:-:47065239:47147481:Ubr2:13:16-17-18-19-20-21-22-23-24-25-26-27-28-29-30-31-32-33-34-35-36-37-38-39-40-41-42-43-44-45-46-47-48-49-50-51>	A5SS	E13,E16	E13,E14,E15	-0.434038	0.800778	1.23482	0.000114105	0.00150493	0.509342	0.207437	-0.301905
uc007yxd.1,uc007yxe.1:chr16:-:31251626:31275363:Ppp1r2:<1-2-3-4-5:	ALE	E5,E6	E5,E7	0.873437	-2.38361	-3.25705	0.000115756	0.00152409	0.949152	0.402327	-0.546824
uc008flz.1,uc008fma.1,uc008fmb.1,uc012beg.1:chr18:-:67480862:67503757:B430212C06Rik:<2:5	A3SS	E2,E5	E2,E4,E5	3.13097	0.329813	-2.80116	0.000116472	0.00152749	0.0239937	0.296194	0.2722
uc008oid.1,uc008oie.1,uc008oif.1,uc008oig.1,uc008oih.1,uc008oii.1,uc012clv.1,uc012clw.1:chr2:+:179805297:179820607:Gtpbp5:5-6:	ALE	E6,E7	E6,E8,E9	-1.07299	-2.76106	-1.68807	0.000116726	0.00152749	0.175983	0.0295773	-0.146406
uc009fgx.2,uc009fgy.2:chr7:+:16705224:16712865:Kptn:<1-2:4	IR	E2,E4	E2,E3,E4	2.75771	1.29305	-1.46466	0.00011681	0.00152749	0.0380208	0.147044	0.109024
uc009osa.1,uc009osb.1,uc009osc.1:chr9:+:32443805:32565405:Ets1::5-7-8-9-10-11-12>	AFE	E1,E2,E3,E5	E4,E5	-2.63995	-0.999988	1.63997	0.000116521	0.00152749	0.0515289	0.341798	0.290269
uc007yzc.2,uc007yze.2,uc007yzf.2,uc012aeo.1:chr16:+:32644728:32683579:Tnk2::11-12	AFE	E10,E11	E1,E2,E3,E4,E5,E6,E7,E8,E9,E11	-3.30441	-1.65615	1.64826	0.000118153	0.00154241	0.716624	0.261268	-0.455357
uc007jvh.1,uc007jvi.1,uc007jvj.1,uc007jvk.1,uc007jvl.1,uc007jvm.1,uc007jvn.1:chr11:+:70376382:70427984:Mink1:23-24:26	ES	E24,E26	E24,E25,E26	0.86972	0.227578	-0.642142	0.000119072	0.00154652	0.27619	0.433869	0.157679
uc008luc.1,uc008lud.1:chr2:-:119481186:119488535:Ndufaf1:<2:4-5-6-7>	A5SS	E2,E4	E2,E3,E4	-3.49596	-0.716281	2.77968	0.000118736	0.00154652	0.960878	0.573566	-0.387312
uc008yhn.2,uc008yho.2,uc008yhp.1,uc008yhq.2,uc012dzr.1:chr5:-:100871057:100929658:Lin54,mKIAA2037::3	AFE	E1,E3	E2,E3	1.54716	-0.451985	-1.99915	0.000119002	0.00154652	0.102258	0.341656	0.239398
uc008upi.2,uc008upj.2,uc008upk.2,uc008upl.2,uc008upm.1,uc008upn.1,uc008upq.1,uc008upr.2,uc008upt.1:chr4:-:123026875:123361603:Macf1:100-101:103-104>	ES	E101,E103	E101,E102,E103	2.14645	0.739203	-1.40724	0.000121149	0.00157084	0.0317763	0.219481	0.187705
uc007ehx.2,uc007ehy.2,uc007ehz.2,uc007eia.2,uc011wzx.1:chr10:-:7350033:7383382:Pcmt1:10:	ALE	E10,E11	E10,E12	0.45309	-0.804229	-1.25732	0.00012264	0.001583	0.814334	0.545587	-0.268747
uc007ocq.1,uc007ocr.1,uc007ocs.1,uc007oct.1,uc011yol.1,uc011yom.1,uc011yon.1:chr12:+:82961016:83101911:Pcnx:<1-2-3-4-5-6:9-11-13-14-15-16-17.18-19-20-21-22-23-24-25-26-28-29-30-31-33-34-35-36-37-38-40-41-42>	ES	E6,E9	E6,E7,E8,E9	0.3667	-0.76715	-1.13385	0.000122705	0.001583	0.227179	0.449751	0.222572
uc008atn.1,uc008ato.1,uc008atp.1,uc008atq.1:chr17:+:23940153:23961710:Srrm2:11-12:14.15-16-17-18>	A3SS	E12,E14	E12,E13,E14	-0.821694	0.377716	1.19941	0.000122353	0.001583	0.455215	0.183335	-0.27188
uc007fxo.1,uc007fxp.1,uc007fxq.1,uc007fxr.1:chr10:-:77734307:77815187:Agpat3::3	AFE	E1,E3	E2,E3	0.934063	-0.433744	-1.36781	0.000124334	0.00160132	0.552052	0.833215	0.281163
uc007pmp.1,uc007pmq.1,uc007pmr.1,uc007pms.1,uc007pmt.1:chr13:-:14090217:14131867:Tbce:<1-2:4	ES	E2,E4	E2,E3,E4	-0.871547	-2.94464	-2.0731	0.000126201	0.00162265	0.667759	0.948457	0.280698
uc007eeu.1,uc007eev.1,uc007eew.1,uc007eex.1:chr1:-:196923575:196957764:Cr1l,Crry:2:4-5-7-8-9-10-11	A5SS	E2,E4	E2,E3,E4	1.37216	2.49386	1.1217	0.000126815	0.00162781	0.128768	0.0363628	-0.0924048
uc007xws.2,uc007xwt.2:chr15:-:102537207:102552609:Calcoco1:<1-2-3-4-5-6-7-8-9-10-11-12-13-14:	ALE	E14,E15	E14,E16	-0.641017	-1.76891	-1.12789	0.000127886	0.00163422	0.303386	0.123229	-0.180157
uc008miu.2,uc008miv.2,uc008miw.2,uc008mix.2,uc008miy.2,uc008miz.2:chr2:-:130243419:130250437:Fam113a:9:	ALE	E9,E10	E9,E11	0.376938	-1.36769	-1.74463	0.0001279	0.00163422	0.774104	0.356909	-0.417195
uc008vwz.1,uc008vxa.1,uc008vxb.1,uc008vxc.1,uc008vxd.1:chr4:-:149089483:149112145:Tmem201:<1-2-3-5-7-8:	ALE	E8,E10,E11,E12,E13	E8,E9	0.782948	-0.281483	-1.06443	0.000127953	0.00163422	0.875808	0.708818	-0.16699
uc009kvo.2,uc009kvp.2,uc009kvq.2,uc009kvr.2,uc009kvs.2:chr8:-:11611582:11635754:Ankrd10:<1-2-3:7-8	ES	E3,E7	E3,E6,E7	1.84871	0.523703	-1.325	0.000128767	0.00164189	0.0931295	0.294932	0.201802
uc008kyb.1,uc008kyc.1:chr2:-:92292921:92300675:Slc35c1::3-4>	AFE	E1,E3	E2,E3	0.501256	-0.940983	-1.44224	0.000129665	0.00164786	0.104201	0.406921	0.30272
uc008qlp.1,uc008qlq.1,uc008qlr.1:chr3:+:95697918:95702213:Aph1a:<1-2-3.4-5-6-7:9.10>	IR	E7,E9	E7,E8,E9	-1.08597	-2.70087	-1.6149	0.000129487	0.00164786	0.564457	0.895053	0.330596
uc008cds.1,uc008cdt.1,uc008cdu.1,uc012aqp.1:chr17:-:34976170:34987149:Skiv2l:16-17:19-20-21-22-23-24-25-26-27-28-29-30-31-32>	IR	E17,E19	E17,E18,E19	-0.372497	0.535653	0.90815	0.000129964	0.00164893	0.521928	0.29633	-0.225598
uc009pgp.1,uc009pgq.1,uc009pgr.1,uc012gsj.1:chr9:+:45714651:45737805:Pcsk7:16-17:19-20-21>	ES	E17,E19	E17,E18,E19	0.480448	1.70424	1.22379	0.000131155	0.0016613	0.301201	0.101849	-0.199353
uc007tml.2,uc007tmm.2,uc007tmn.2,uc007tmo.2:chr14:+:51710751:51725826:Ang,Rnase4:<1:	ALE	E1,E3	E1,E4	-2.01044	-1.03271	0.977729	0.000132276	0.00166998	0.22574	0.431591	0.205851
uc007lmr.1,uc007lms.1:chr11:-:100818050:100831931:Ptrf:<1:	ALE	E1,E2	E1,E3	-3.77572	-1.91975	1.85597	0.00013318	0.00167864	0.032829	0.18509	0.152261
uc007ijd.2,uc007ije.2:chr11:+:32126504:32132702:Mpg:<1-2:4.5-6>	ES	E2,E4	E2,E3,E4	1.4812	0.222238	-1.25896	0.000133452	0.00167931	0.0835453	0.220858	0.137313
uc007nou.1,uc007nov.1,uc007now.1,uc007nox.1,uc007noy.1,uc011ymb.1:chr12:-:56703885:56922154:Ralgapa1:<1-2-3-4-5-6-7-8-9-10-11-12-13-14-15-16-18:	ALE	E18,E19	E18,E20,E21,E22,E23,E25,E26,E27,E28,E29,E30,E31,E33,E34,E35,E36,E37,E38,E39,E40,E42,E43,E44	-2.91425	-1.47103	1.44323	0.000134514	0.0016899	0.254838	0.588728	0.33389
uc007rfk.1,uc007rfl.1,uc007rfm.1,uc007rfn.1,uc007rfo.1,uc007rfp.1,uc007rfq.1,uc011zbx.1:chr13:-:74831733:74946208:Cast::3-4	AFE	E1,E3	E2,E3	2.09976	0.332642	-1.76712	0.000137469	0.0017242	0.271195	0.673634	0.402439
uc009rno.1,uc009rnp.1,uc009rnq.1,uc009rnr.2,uc009rnt.1,uc009rnu.2,uc009rnx.2,uc009rny.2,uc009rnz.1,uc009roa.1,uc009rob.1,uc009roc.1,uc009rod.1,uc009roe.1,uc009rof.1,uc012han.1,uc012hao.1,uc012hap.1,uc012haq.1:chr9:+:107877897:107951113:AK157941,AK197603,Cdh29,Cdhr4,D330022A01Rik,Ip6k1,Uba7,Ube1l:26:28	IR	E26,E28	E26,E27,E28	0.859746	0.204525	-0.655222	0.000138758	0.00173753	0.231149	0.344525	0.113376
uc007apo.2,uc007app.2,uc007apq.2,uc007apr.2:chr1:-:36196872:36301147:Ugcgl1,Uggt1:<1-2-3-4-5-6-7.8-9-10-11-12-13-14-15-16-17-18-19-20-22:24-25-26-27-28-30-31-32-34-35-36-37-38-39-40-41-42-43-44-45>	ES	E22,E24	E22,E23,E24	1.80388	-0.434292	-2.23817	0.000139136	0.00173942	0.12193	0.609196	0.487265
uc008iwv.1,uc008iww.1,uc008iwx.1,uc008iwy.1,uc012bst.1,uc012bsu.1:chr2:-:26876884:26883518:Slc2a6:<1-2-3-4-5-6.7-9:11	IR	E9,E10,E11	E9,E11	0.667829	-1.22378	-1.8916	0.000139828	0.00174524	0.465355	0.124943	-0.340412
uc009edo.1,uc009edp.1,uc009edq.1,uc012etc.1:chr6:-:128359461:128374928:Itfg2:<1-2-4:8-9-10-11-12-13	ES	E4,E8	E6,E8	-1.46326	-20	-18.5367	0.000142148	0.00177131	0.711789	1	0.288211
uc008otp.2,uc008otq.2,uc008otr.1:chr3:-:27315083:27610229:Fndc3b,fad104::6-7-8-9-10-11-12-13-15-16-17-18-19-20-21	AFE	E1,E6	E2,E3,E4,E6	1.26743	-0.441833	-1.70927	0.000146323	0.00182038	0.368691	0.758436	0.389745
uc009oux.1,uc009ouy.1:chr9:+:37296905:37331735:BC024479:<1:4-5-6>	A3SS	E1,E4	E1,E3,E4	0.439893	-2.24621	-2.6861	0.000146921	0.00182487	0.294522	0.852847	0.558325
uc008pus.1,uc008put.1,uc012crq.1,uc012crr.1:chr3:+:88140181:88166259:Smg5:<1-2-3-4-5-6-7-8-9-10-11-12:	ALE	E12,E13,E14	E12,E16,E17,E18,E19,E20,E21,E22,E23,E24,E25	-2.05746	-0.908757	1.1487	0.000147559	0.00182983	0.234897	0.46652	0.231622
uc009sna.1,uc009snb.1,uc009snc.1:chrX:+:7461369:7471618:Slc35a2:<1-2-3-4.5:	ALE	E5,E6	E5,E7	1.00467	-0.407442	-1.41211	0.000151612	0.00187706	0.424265	0.156187	-0.268078
uc009coh.2,uc009coi.2,uc012eob.1:chr6:+:83745021:83752550:AK084646,Nagk:<1.2.3:6-7-8-9-10-11-12-13-14>	A5SS	E3,E6	E4,E6	-0.257067	0.997823	1.25489	0.000153563	0.00189815	0.49084	0.24315	-0.24769
uc008awx.1,uc008awy.1,uc008awz.1,uc008axa.1,uc008axb.1,uc008axc.1,uc008axd.1,uc008axe.1,uc008axf.1,uc008axg.1,uc008axh.1:chr17:-:24732881:24769574:Tsc2:31-32-33-34-35:37-38-39-40-41-42-43-44.45-47-48>	ES	E35,E37	E35,E36,E37	0.0777172	-0.850599	-0.928316	0.000155192	0.0019152	0.413468	0.635631	0.222163
uc008oms.1,uc008omt.1:chr2:-:181303858:181316678:Uckl1:<1-2-3-4-6-7-8:10-11-12-13-14-15-16>	ES	E8,E10	E8,E9,E10	-0.394457	-1.19207	-0.797612	0.000156234	0.00192496	0.583032	0.741293	0.158262
uc007sla.2:chr14:-:21852963:21871664:Ap3m1:<1-2:4-5-6-7-8-9>	ES	E2,E4	E2,E3,E4	-0.480185	-2.27777	-1.79758	0.000157867	0.00194197	0.648074	0.857925	0.209851
uc007det.1,uc007deu.1,uc007dev.1,uc007dew.1,uc007dex.1,uc011wun.1:chr1:+:162965296:162968668:Gas5:<1:3	IR	E1,E3	E1,E2,E3	1.47255	2.9086	1.43605	0.000160415	0.00197015	0.0692991	0.0173493	-0.0519497
uc008llf.2,uc008llg.2:chr2:-:105806864:105843706:Dnajc24:<1-2:4	ES	E2,E4	E3,E4	0.775292	-1.21109	-1.98638	0.000162161	0.00198525	0.237415	0.695489	0.458074
uc008fph.2,uc008fpj.2,uc008fpk.1,uc012bex.1:chr18:+:74427941:74442338:Mbd1:<1-2-3-4-5-6-7-8-10-11:13-14-15-16	ES	E11,E13	E11,E12,E13	-0.936645	-0.105185	0.83146	0.000164668	0.00201273	0.59401	0.383361	-0.210648
uc009bkw.2,uc009bkx.2,uc009bky.2,uc009bkz.2,uc009blb.2:chr6:-:38647838:38826189:Hipk2:5-6-7-8-9:11-12	A3SS	E9,E10,E11	E9,E11	-0.0866476	1.47093	1.55758	0.000167487	0.00204393	0.414119	0.791672	0.377553
uc007fja.2,uc007fjb.1,uc007fjc.2,uc007fjd.1,uc011xff.1:chr10:-:62206675:62255116:Ccar1:4-5-6-7-8-9-10-11-13-16-17-18:20	ES	E18,E20	E18,E19,E20	-20	-1.86497	18.135	0.00016821	0.00204949	1	0.855777	-0.144223
uc008ipv.2,uc008ipw.2,uc008ipx.2,uc008ipy.2,uc008ipz.2,uc012brs.1:chr2:+:24831552:24909592:Pnpla7:4-5-6-7-8-9-11-12-13-14-15-16-18-19-20-21-22-23-24-25:29-30-31-32-33-34-35-36-37-38-39-40-42>	ES	E25,E29	E25,E26,E29	-0.992365	-2.40188	-1.40951	0.000168775	0.00205123	0.687887	0.898223	0.210336
uc008vuq.2,uc008vur.2:chr4:+:147822690:147931794:Mtor:<1-2-3-4-5:	ALE	E5,E6	E5,E7,E8,E9,E10,E11,E12,E13,E14,E15,E16,E17,E18,E19,E20,E21,E22,E23,E24,E25,E26,E27,E28,E29,E30,E31,E32,E33,E34,E35,E36,E37,E38,E39,E40,E41,E42,E43,E44,E45,E46,E47,E48,E49,E50,E51,E52,E53,E54,E55,E56,E57,E58,E59	-1.44691	-3.53201	-2.0851	0.000168887	0.00205123	0.879721	0.416222	-0.463498
uc007bbv.2,uc007bbw.2,uc007bbx.2,uc007bby.2:chr1:-:58487836:58502330:Ppil3:2:5-6-7-8-9-11>	A5SS	E2,E5	E3,E5	-1.42232	0.266297	1.68862	0.000169347	0.00205357	0.700805	0.333804	-0.367001
uc007uai.1,uc007uaj.1,uc007uak.1,uc007ual.1,uc007uam.1:chr14:-:56334713:56341094:Rabggta:<3:	ALE	E3,E4	E3,E5,E6,E7,E8,E9,E10,E11,E12,E13	-2.40417	-20	-17.5958	0.000170801	0.00206793	0.375714	0	-0.375714
uc008pjb.1,uc008pjc.1,uc008pjd.1,uc008pje.1,uc008pjf.1,uc008pjg.1,uc008pjh.1,uc012cqb.1:chr3:+:60277031:60433670:Mbnl1,mKIAA0428:11:13-14>	ES	E11,E13	E11,E12	-3.2533	-1.51127	1.74203	0.000178775	0.0021509	0.955819	0.759905	-0.195914
uc009llq.2,uc009llr.2,uc009lls.2,uc009llt.1,uc009llu.1,uc009llv.1,uc012gcj.1:chr8:-:37630792:38015490:A730069N07Rik,Dlc1::11-12-13-14-15-16-17-18-19-20-21-22-24>	AFE	E10,E11	E1,E2,E4,E6,E8,E11	1.86653	0.486996	-1.37953	0.000178593	0.0021509	0.02611	0.11101	0.0849003
uc009qoy.2,uc009qoz.2:chr9:-:71326243:71333790:Grinl1a::3-4-5>	AFE	E1,E3	E2,E3	6.07722	2.06265	-4.01457	0.000178631	0.0021509	0.00067724	0.152615	0.151937
uc009aip.1,uc009aiq.1,uc009air.1,uc012ege.1:chr5:+:142939884:142954669:C330006K01Rik:10.11:	ALE	E11,E12	E11,E13,E14,E15,E16,E17,E18,E19,E20,E21	-1.46479	-3.00324	-1.53845	0.000179092	0.00215135	0.797202	0.408429	-0.388772
uc008tzn.1,uc008tzo.2,uc008tzp.1:chr4:+:106926534:106952493:Hspb11:<1.2:4-6-7-8-9>	A5SS	E2,E4	E2,E3,E4	-2.12878	-0.0652643	2.06352	0.000179817	0.00215668	0.904249	0.506613	-0.397636
uc007tzs.1,uc007tzt.1,uc007tzu.1,uc007tzv.1,uc007tzw.1:chr14:-:56254802:56262643:Tm9sf1:10:	ALE	E10,E11	E10,E13,E14	-2.51752	-4.17526	-1.65773	0.000181318	0.00216791	0.197066	0.0456738	-0.151392
uc008kcu.1,uc008kcv.1,uc008kcw.1:chr2:-:73267673:73367467:Wipf1::4-5-6-7-8-9-10>	AFE	E1,E4	E3,E4	0.628609	-2.57192	-3.20053	0.000181295	0.00216791	0.150108	0.668457	0.518349
uc008zej.1,uc008zek.1,uc008zel.1,uc008zem.1,uc008zen.1:chr5:-:116099294:116181568:Ccdc64::15-16>	AFE	E12,E15	E14,E15	1.47727	-0.348307	-1.82557	0.000181759	0.0021698	0.138916	0.534006	0.39509
uc007lgz.1,uc007lha.1,uc007lhb.1,uc007lhc.1,uc011yeg.1:chr11:-:98565904:98590749:Med24:12:14-15-16-17-18-19-20-21-22-23-24-25-26-28-29-30-31-32-33-34>	IR	E12,E14	E12,E13,E14	-2.11122	-0.383327	1.72789	0.000183704	0.00218961	0.656221	0.201579	-0.454641
uc008vrm.2,uc008vrn.2,uc008vro.2,uc012dov.1:chr4:+:144482729:144517548:Dhrs3:<2.3-4:6-7-8-9>	A3SS	E4,E6	E4,E5,E6	1.08431	2.18807	1.10375	0.000185286	0.00220505	0.156981	0.0613136	-0.0956671
uc007vfc.1,uc007vfd.1,uc007vfe.1,uc011zrd.1:chr15:+:9001008:9040244:1110020G09Rik:<1-2-3-4-5-6-7:9-10-11-12-14>	ES	E7,E9	E7,E8,E9	0.680779	-0.542648	-1.22343	0.00018627	0.00221333	0.285613	0.558578	0.272965
uc007lxd.2,uc007lxe.2,uc007lxf.2,uc007lxg.2,uc011yge.1:chr11:+:105042843:105145270:Tlk2:<1-2-3-4-5:7	ES	E5,E7	E5,E6,E7	-3.57092	-1.80582	1.7651	0.000187546	0.0022247	0.967078	0.835492	-0.131586
uc008rou.1,uc008rov.1,uc008row.1:chr3:+:142223015:142236176:Gbp3:<1:4-5-6-7-8-9-10-11-12-13>	ES	E1,E4	E1,E3,E4	-0.469784	1.21843	1.68821	0.000187807	0.0022247	0.59039	0.157552	-0.432839
uc008mlm.2,uc008mln.2,uc008mlp.2,uc008mlq.2,uc008mlr.2,uc008mls.2,uc008mlt.2,uc012ceo.1,uc012cep.1,uc012ceq.1:chr2:+:131317597:131350919:Smox:9.10:12>	ES	E10,E12	E10,E11,E12	1.02279	1.70702	0.684225	0.000188721	0.00223208	0.214098	0.116785	-0.0973123
uc007hny.2,uc007hnz.2,uc007hoa.1,uc011xqh.1:chr10:-:128134994:128142107:Cdk2:4-5-6-7:9-10.11.12>	ES	E7,E9	E7,E8,E9	-0.794316	0.609081	1.4034	0.000191155	0.0022574	0.544036	0.250134	-0.293902
uc009nft.1,uc009nfu.1,uc009nfv.1,uc009nfw.1:chr8:+:108734953:108775594:Prmt7,mKIAA1933:<1-2-3-4-5-6-8-9:11-12-14-15-16-17-18-19-20-21>	A5SS	E9,E10,E11	E9,E11	-1.10931	-2.26868	-1.15938	0.000192151	0.00226567	0.0795074	0.0259811	-0.0535263
uc007few.2,uc007fex.2,uc007fey.1:chr10:+:59809598:59893042:4632428N05Rik::3-4-5-6	AFE	E1,E3	E2,E3	3.57972	2.31644	-1.26328	0.000193708	0.0022783	0.0716157	0.197017	0.125402
uc008cua.2,uc008cub.2,uc008cuc.1:chr17:-:46819939:46841951:Ppp2r5d:3-4-5-6-7-8-9-10-11-12-13-14-15:17>	IR	E15,E17	E15,E16,E17	0.891597	2.04039	1.14879	0.000193816	0.0022783	0.207927	0.0678272	-0.1401
uc009aod.2,uc009aoe.2,uc009aof.2,uc009aog.2:chr5:+:148242155:148360077:Pan3:<1-2-3-4-5:7-8-9-10-11-12-14-15-16-17-18-19-20-21>	ES	E5,E7	E5,E6,E7	-0.599786	1.14309	1.74288	0.000196468	0.00230242	0.520308	0.150018	-0.370289
uc009ipp.1,uc009ipq.1,uc009ipr.1,uc009ips.1,uc009ipt.1:chr7:+:109029838:109050359:3200002M19Rik:6-7-8:10>	IR	E8,E10	E8,E9,E10	-1.39959	0.727358	2.12695	0.000196372	0.00230242	0.655104	0.171915	-0.483189
uc007ajv.1,uc007ajw.1:chr1:-:16632845:16647123:Tceb1::3-4-5>	AFE	E1,E3	E2,E3	-1.38629	-0.0489608	1.33733	0.000201136	0.00235353	0.843472	0.553524	-0.289948
uc008pxt.2,uc008pxu.2,uc008pxv.1,uc008pxw.1,uc008pxx.1,uc012cse.1,uc012csf.1,uc012csg.1,uc012csh.1:chr3:+:88968726:88986692:Clk2,Scamp3:7-8-10-11-12-13-14-15:	ALE	E15,E16	E15,E17	-1.65801	-0.298098	1.35991	0.000208007	0.00242432	0.354497	0.696827	0.342329
uc009lgf.2,uc009lgg.1,uc009lgh.1,uc009lgi.1,uc009lgj.2:chr8:-:26688961:26707968:Letm2:<2:5-6-8-10-12-13-15-16-18-19>	A5SS	E2,E5	E2,E3,E4,E5	-1.7526	0.584768	2.33737	0.000208132	0.00242432	0.744173	0.220859	-0.523314
uc007jyq.2,uc007jyr.2,uc011xyi.1:chr11:+:72115130:72127235:Xaf1:<1-2:4	ES	E2,E4	E2,E3,E4	-1.56757	-0.301819	1.26575	0.000210221	0.00244493	0.727591	0.455887	-0.271704
uc007iyl.2,uc007iym.2,uc007iyn.2,uc007iyo.2,uc007iyp.2,uc007iyq.2:chr11:-:54724288:54776442:Tnip1::4	AFE	E1,E4	E2,E4	-0.39296	-1.78956	-1.3966	0.000211575	0.00245696	0.612735	0.860253	0.247518
uc008fml.1,uc008fmm.1,uc008fmn.1,uc008fmo.1,uc008fmp.1,uc012bej.1:chr18:-:67647862:67770444:AK053505,Spire1:<1-2-3-5-6-7-8-9-13-14-15:17-18-19-20-21>	ES	E15,E17	E15,E16,E17	1.08329	-0.401879	-1.48516	0.000212495	0.00245801	0.161244	0.426988	0.265744
uc008ryf.2,uc008ryg.2,uc008ryh.1,uc008ryi.2,uc008ryj.2,uc008ryk.2,uc008ryl.2,uc008rym.1,uc008ryn.2,uc008ryo.2,uc008ryp.1,uc012dak.1:chr4:-:9376231:9596491:Asph:5-7:	ALE	E7,E10,E11	E7,E12	-1.36986	1.28235	2.65222	0.000212946	0.00245801	0.0293897	0.21569	0.186301
uc009dsw.1,uc009dsx.1,uc009dsy.1,uc009dsz.1,uc009dtb.1,uc009dtc.1:chr6:+:124959255:124987887:Zfp384::3-4-5	AFE	E1,E3	E2,E3	2.62528	-0.99516	-3.62044	0.000212911	0.00245801	0.0380393	0.795378	0.757339
uc009olu.2,uc009olv.2,uc009olw.2:chr9:+:21351337:21393909:Carm1:<1-2-3:	ALE	E3,E4	E3,E5,E6,E7,E8,E9,E10,E11,E12,E13,E14,E15	-1.63654	-3.3025	-1.66596	0.000212733	0.00245801	0.51348	0.135946	-0.377535
uc008rbx.1,uc008rby.1:chr3:-:115812937:115832606:Vcam1:<1-2-3-4:	ALE	E4,E5	E4,E6,E7,E8,E9,E10	-4.67444	-2.62812	2.04632	0.00021671	0.00249395	0.0409085	0.307884	0.266975
uc009ngx.2,uc009ngy.2,uc012gjz.1:chr8:-:109570189:109580637:Cog8,Pdf::8>	AFE	E1,E2,E3,E4,E5,E8	E7,E8	-0.615571	0.79493	1.4105	0.000216439	0.00249395	0.130224	0.38875	0.258526
uc008uak.1,uc008ual.1,uc008uam.1:chr4:+:107562467:107570407:0610037L13Rik::11.12>	AFE	E10,E11	E3,E4,E5,E6,E7,E8,E11	-1.16438	-2.38817	-1.22379	0.000218257	0.00250425	0.622204	0.859931	0.237727
uc009oqy.1:chr9:+:30234913:30274311:Snx19:<1-2-3-4-5-6-7-8:10-11>	ES	E8,E10	E8,E9,E10	-3.32577	-1.37438	1.95139	0.000219376	0.00251333	0.965104	0.742314	-0.22279
uc008zkg.1,uc008zkh.1,uc008zki.1:chr5:-:122267223:122286810:Sh2b3:<1:3-4-5-6-7.8-9-10>	ES	E1,E3	E1,E2,E3	0.906962	-0.32857	-1.23553	0.000220412	0.00252143	0.219969	0.633642	0.413673
uc007klw.2,uc007kly.2,uc007klz.2,uc007kma.2,uc007kmb.2,uc007kmc.2:chr11:+:80196780:80219235:Zfp207:16:	ALE	E16,E17	E16,E18,E19,E20,E21,E22	-0.405465	1.3375	1.74297	0.00022128	0.0025276	0.675138	0.935184	0.260045
uc007bod.1,uc007boe.1,uc011wni.1,uc011wnj.1:chr1:+:75188708:75195960:Ankzf1:7:10-11-12.13-14-15-16-17-18>	IR	E7,E10	E7,E8,E9,E10	-0.12369	-1.50165	-1.37796	0.000225764	0.00256735	0.324153	0.682721	0.358568
uc009iqi.1,uc009iqj.1,uc009iqk.1,uc009iql.1,uc009iqm.1,uc009iqn.1,uc009iqo.1,uc012fqr.1,uc012fqs.1:chr7:+:109214226:109244930:Trpc2:12-13-14.15.16.17:	ALE	E17,E18,E19,E20	E17,E21,E22,E23,E24,E25,E26,E27,E28,E29,E30,E31,E32	1.08003	2.30806	1.22803	0.000230222	0.00261418	0.925491	0.978955	0.0534639
uc008jpw.2,uc008jpx.2:chr2:+:49307005:49407129:Epc2:<1-2-3-4-6-7:9-10-11-12-13-14-15>	ES	E7,E9	E7,E8,E9	-20	-1.14549	18.8545	0.000230771	0.00261654	1	0.621129	-0.378871
uc009fet.2,uc009feu.2,uc009fev.2,uc009few.1,uc009fex.2,uc012eze.1:chr7:+:13563196:13571065:Zfp446:5-6-7.8-11:13>	IR	E11,E13	E11,E12,E13	-0.160473	-1.82608	-1.6656	0.000238604	0.00270136	0.395361	0.733889	0.338528
uc008zli.2,uc008zlj.2:chr5:-:122903521:122952234:Atp2a2:<1-2-3-4-5-6-7-8-9-10-11-12-13-14-15-16-17-18-19-20:22>	A5SS	E20,E22	E20,E21,E22	-3.23815	-1.58559	1.65256	0.000240245	0.00271594	0.818402	0.427903	-0.390499
uc008hrm.1,uc008hrn.1,uc008hrp.1,uc008hrq.1:chr19:-:45824748:45858269:Mgea5:<2.3-4-5:7-8-9-10-11-12-13	IR	E5,E7	E5,E6,E7	-0.256933	1.79662	2.05355	0.000244386	0.00275464	0.195294	0.0256563	-0.169638
uc008uxt.1,uc008uxu.1,uc008uxv.1,uc008uxw.1:chr4:-:129296517:129301152:AK031278,Ccdc28b::4	AFE	E1,E2,E4	E3,E4	1.3938	0.0483481	-1.34545	0.000249643	0.00280977	0.47611	0.173422	-0.302688
uc008lwj.2,uc008lwk.2,uc008lwl.2,uc008lwm.2,uc008lwn.1:chr2:-:120429973:120435244:Lrrc57:5:8-9-10-11-12>	A5SS	E5,E8	E5,E6,E7,E8	-0.522468	0.708165	1.23063	0.000250731	0.00281788	0.483682	0.221545	-0.262137
uc008aaq.1,uc008aar.1,uc008aas.1,uc008aat.1,uc008aau.1,uc008aav.1,uc008aaw.1,uc008aax.1,uc008aay.1,uc008aaz.1,uc008aba.1,uc008abb.1,uc008abc.1,uc008abd.1,uc012aiu.1:chr16:+:94592345:94690828:Ttc3:15:17-18-19	ES	E15,E17	E15,E16,E17	1.10272	-1.05199	-2.1547	0.000253897	0.00284929	0.161885	0.720053	0.558168
uc009peu.2,uc009pev.2,uc009pew.2:chr9:-:44731209:44773683:Ube4a:<1:4	ES	E1,E4	E1,E2,E3,E4	-1.36801	-2.52246	-1.15446	0.000254445	0.00285127	0.693619	0.899096	0.205477
uc007ksn.2,uc007kso.2,uc007ksp.2:chr11:-:86312512:86358309:Rps6kb1::11-13-14-15-16-17-18-19-20>	AFE	E10,E11	E1,E2,E3,E4,E5,E7,E11	-1.07188	-3.69962	-2.62774	0.000256561	0.00286661	0.797133	0.967517	0.170384
uc009iyq.2,uc009iyr.2,uc012frp.1:chr7:-:112782714:112788930:Arfip2:<1-2-3-5-6.7:9-10-11>	A5SS	E7,E9	E7,E8,E9	0.234552	1.31888	1.08433	0.000256505	0.00286661	0.314005	0.122724	-0.191282
uc007vep.1,uc007veq.1,uc007ver.1,uc007ves.1,uc007vet.1,uc007veu.1,uc007vev.1:chr15:-:8241224:8415285:Nipbl:<3-4-5-6-7-8-9-11-12-14-15-16-17-18-19-20-21-22-23-24-25-26-27-28-29-30-31-32-33-34-35-36-37-38-39-40-41-42-43-45-46-47-49-50-51-52:55>	A5SS	E52,E55	E53,E55	0.506424	2.35651	1.85008	0.000258387	0.00288282	0.332825	0.0632425	-0.269583
uc008xlh.1,uc008xli.1,uc008xlj.1,uc008xlk.1,uc012dwg.1:chr5:+:53947017:54048684:Rbpj::7-8-9-10-11-12-13-14-15-16>	AFE	E2,E7	E3,E7	0.336472	-1.36828	-1.70475	0.000260593	0.00289901	0.539165	0.887225	0.34806
uc008cbt.2,uc008cbu.2,uc008cbv.2,uc012apt.1,uc012apu.1:chr17:+:34324500:34334170:Tap1:4:7	IR	E4,E7	E4,E5,E6,E7	1.42331	0.31949	-1.10382	0.00026408	0.00293354	0.0441599	0.129478	0.0853183
uc007lml.2,uc007lmm.1,uc007lmn.1,uc011yfg.1:chr11:+:100720664:100746483:Stat5a:<1-3-4-5-6-7-8:10-12-14	IR	E8,E10	E8,E9,E10	1.28358	3.36399	2.08041	0.000265128	0.00294092	0.135381	0.0117865	-0.123594
uc007mjw.1,uc007mjx.1,uc007mjy.1:chr11:-:115967139:115971330:Trim47::4-5	AFE	E1,E2,E4	E3,E4	1.90056	3.90197	2.00141	0.000265621	0.00294215	0.533668	0.918792	0.385123
uc007kxn.2,uc007kxo.2,uc007kxp.1,uc007kxr.2:chr11:+:93747419:93808298:Mbtd1::25.26>	AFE	E24,E25	E6,E7,E8,E9,E10,E11,E12,E13,E14,E15,E16,E17,E18,E20,E21,E22,E23,E25	0.358127	-1.66276	-2.02089	0.000267396	0.00295753	0.0615077	0.27351	0.212003
uc008jrh.1,uc008jri.1,uc008jrj.1:chr2:+:52716901:52993236:Fmnl2,mKIAA1902:<18-19-20-21-22-23-24-25:28>	ES	E25,E28	E25,E26,E27,E28	-20	-0.0723207	19.9277	0.000270435	0.00298684	1	0.370386	-0.629614
uc008pcr.1,uc008pcs.1,uc008pct.1,uc008pcu.1,uc008pcv.1,uc008pcw.1:chr3:+:41546539:41562861:D3Ertd751e:<1.2:6-7	ES	E2,E6	E2,E5,E6	0.064076	1.9406	1.87652	0.000271163	0.00299059	0.379534	0.088286	-0.291248
uc009ftx.2,uc009fty.2,uc009ftz.2,uc012ffy.1,uc012ffz.1:chr7:-:26541518:26573752:Axl:11-12-13-14-15:17	IR	E15,E17	E15,E16,E17	0.70366	1.97507	1.27141	0.000272167	0.00299735	0.156385	0.0438145	-0.11257
uc008iae.2,uc008iaf.2,uc008iag.2:chr19:+:57527395:57565495:Trub1:3-4-5-6:	ALE	E6,E10	E6,E7	-1.10514	1.24548	2.35062	0.000272876	0.00300086	0.461746	0.885794	0.424048
uc008zlb.1,uc008zlc.1:chr5:+:122804421:122813296:Vps29:<1:3-4-5>	ES	E1,E3	E1,E2,E3	1.45093	2.37923	0.9283	0.000280235	0.00307737	0.178407	0.0751951	-0.103212
uc008caa.2,uc008cab.2:chr17:+:34046389:34052535:Daxx:<1:3-4-5-6-7-8-9>	ES	E1,E3	E1,E2,E3	0.215073	1.60805	1.39297	0.000283945	0.00311366	0.282799	0.112095	-0.170704
uc007swy.1,uc007swz.1,uc007sxa.1,uc007sxb.1,uc007sxc.1,uc011zif.1:chr14:-:31984113:32020012:Nisch,mKIAA0975:<1-2-3-5-6-7-8-9-10-11.12-13:	ALE	E13,E14	E13,E15,E16	-0.316483	-1.45166	-1.13518	0.000284947	0.00312019	0.129207	0.0520921	-0.0771145
uc007swu.1,uc007swv.1,uc007sww.1,uc007swx.2:chr14:-:31952202:31981827:FELE-1,Stab1:<1-2-3-4-5-6-7-8-9-10-11-12-13-14-15-16-17-18:	ALE	E18,E19	E18,E20,E21,E23,E25,E26,E27,E28,E29,E30,E31,E32,E33,E34,E35,E36,E37,E38,E39,E40,E41,E42,E43,E44,E45,E46,E47,E48,E49,E50,E51,E53,E54,E55,E56,E57	-0.811102	-2.15391	-1.34281	0.000287826	0.00314722	0.833753	0.556977	-0.276776
uc007xwc.2,uc007xwd.2,uc007xwe.2:chr15:-:102328077:102347435:Map3k12:<1:6-7-8-9-10-11-12-13-14-15-16-17-18>	ES	E1,E6	E1,E3	-0.254892	-20	-19.7451	0.000288979	0.00315533	0.427563	1	0.572437
uc008mpo.2,uc008mpp.2:chr2:+:139996381:140030988:2310003L22Rik::3-4-5-6-7	AFE	E1,E3	E2,E3	20	1.94713	-18.0529	0.000290181	0.00316396	0	0.0867636	0.0867636
uc007hcj.1,uc007hck.1,uc011xnl.1:chr10:-:116342839:116387436:Rab3ip:5:7-8-9-10-11-12>	IR	E5,E7	E5,E6,E7	0.957029	2.43864	1.48161	0.000291269	0.00317132	0.0958904	0.0196779	-0.0762124
uc007xct.2,uc007xcu.2,uc007xcv.2,uc007xcw.1:chr15:+:84867491:84893260:Fam118a:<1:	ALE	E1,E2	E1,E4,E5,E6,E7,E9,E10,E11,E12	-1.9082	-3.75756	-1.84936	0.000292535	0.0031806	0.637833	0.180908	-0.456924
uc007pfi.1,uc007pfj.1:chr12:-:114058445:114067634:Cdca4::4>	AFE	E1,E2,E4	E3,E4	2.2691	1.0692	-1.19991	0.000297757	0.00323279	0.974047	0.913079	-0.0609679
uc007hrs.1,uc007hrt.1,uc007hru.1,uc007hrv.1,uc007hrw.1,uc007hrx.1,uc007hsa.1,uc007hsb.1:chr11:-:3031852:3093466:BC049259,Sfi1:<1-2-4-5-7-8-9-10-11-12-13-14-15-16-17-18-19-20:22-23-24-25-26-27-28.29	ES	E20,E22	E20,E21,E22	0.966001	1.86085	0.894845	0.000299627	0.0032485	0.214085	0.0945444	-0.119541
uc008ggw.1,uc008ggx.1,uc008ggy.1,uc008ggz.1,uc008gha.1:chr19:-:6062820:6067867:Tm7sf2:3:5	ES	E3,E5	E3,E4	-2.26669	-0.79451	1.47218	0.000302389	0.00327382	0.851602	0.571029	-0.280573
uc007wsy.1,uc007wsz.1:chr15:+:79059603:79079896:Pick1:<1.2:4-5-6-7-8-9-10-11-12-13-14-15>	A5SS	E2,E4	E2,E3,E4	-2.5755	-1.46702	1.10848	0.000303632	0.00328265	0.900174	0.706994	-0.19318
uc009lra.1,uc009lrb.1,uc009lrc.1,uc012gdn.1:chr8:-:48575481:48618824:D030016E14Rik::18-19-20-22-23-24-25-27-28-29-30-31-32-33-34-35>	AFE	E1,E2,E3,E4,E5,E6,E8,E9,E10,E11,E12,E13,E14,E16,E18	E17,E18	0.890776	2.55976	1.66899	0.000304396	0.00328628	0.311919	0.770807	0.458889
uc009rsy.2,uc009rsz.2,uc009rta.2,uc009rtb.2,uc009rtc.1,uc009rtd.1,uc009rte.1,uc009rtf.1:chr9:+:109834277:109986451:Map4,Mtap4:<1-2-3-5-6-7-8-9-12-13-14-15-16:18	ES	E16,E18	E16,E17,E18	-3.43903	-1.08149	2.35754	0.000308529	0.00332622	0.956359	0.667873	-0.288486
uc009puh.1,uc009pui.1,uc009puj.1,uc009puk.1:chr9:-:56991062:56996019:Neil1:7-8-9-10-11:13-14>	ES	E11,E13	E11,E12,E13	-1.71403	-3.053	-1.33896	0.000310173	0.00333926	0.816456	0.949569	0.133113
uc008cja.2,uc008cjb.2,uc008cjc.2,uc008cjd.2,uc008cje.2,uc008cjf.1,uc012arw.1:chr17:-:36034540:36047013:2610110G12Rik,Atat1::3-4-5-6-7-8	AFE	E1,E3	E2,E3	3.02711	0.19928	-2.82783	0.000311986	0.0033447	0.0637121	0.528196	0.464484
uc008zvt.1,uc008zvu.1,uc008zvv.1,uc008zvw.1,uc008zvx.1,uc008zvy.1,uc008zvz.1,uc008zwa.1,uc008zwb.1,uc008zwc.1,uc008zwd.1,uc008zwe.1,uc008zwf.1,uc008zwg.1,uc008zwh.1,uc012eee.1:chr5:-:134833530:134932581:Gtf2ird1:3-4-5-6-7:	ALE	E7,E8	E7,E9,E11,E12,E13,E14,E15,E16,E17,E18,E19,E20,E21	-1.12464	-2.91009	-1.78545	0.000311727	0.0033447	0.279331	0.0504947	-0.228837
uc009prm.1,uc009prn.1,uc009pro.1:chr9:-:54564961:54582335:Wdr61:<1.2:4	A5SS	E2,E4	E2,E3,E4	-0.207674	0.560853	0.768526	0.000311346	0.0033447	0.466521	0.291274	-0.175248
uc009dsa.1,uc009dsb.1,uc012esq.1:chr6:-:124765036:124779465:Usp5:<1-2-3-4-5-6-7-8-9-10-11-12-13-14-15:17-18-19-20-21>	A5SS	E15,E17	E15,E16,E17	2.02807	0.857882	-1.17019	0.000316899	0.00339263	0.0704341	0.223299	0.152864
uc008llv.1,uc008llw.1,uc008llx.1:chr2:-:108932456:109120883:Mett5d1::3-6-7-8-9>	AFE	E1,E3	E2,E3	1.82132	-1.39894	-3.22025	0.000322023	0.00344269	0.137507	0.813813	0.676306
uc008fyn.2,uc008fyo.2:chr19:+:4100116:4113965:Pitpnm1::3-4-5-6-7-8-9-10-11-12-13-14-15-16-17-18-19-20-21-22-23-24-25>	AFE	E1,E3	E2,E3	0.342767	1.23969	0.896924	0.00032441	0.00346338	0.115385	0.0576907	-0.0576941
uc009epw.2,uc009epx.2,uc009epy.2,uc009epz.2,uc009eqa.2,uc009eqb.1,uc009eqc.2:chr6:-:142959439:143048627:5730419I09Rik,Kiaa0528,mKIAA0528::3-4-5-7-8-9-11-13-14-15-16-17-18-19-20-21-22-23-24-25-26>	AFE	E1,E3	E2,E3	2.70462	0.972145	-1.73248	0.000330024	0.00350867	0.181065	0.571138	0.390073
uc008xvi.2,uc008xvj.2,uc008xvk.2,uc012dxo.1,uc012dxp.1:chr5:-:77302683:77334539:AASDH,Aasdh:<1:3-4-5-6-9-10-11-12-13-14-15-16-17-18-20>	ES	E1,E3	E1,E2,E3	0.584934	-0.437468	-1.0224	0.000334469	0.00355101	0.294233	0.536084	0.241852
uc009cor.1,uc009cos.1,uc009cot.1,uc009cou.1,uc009cov.1,uc009cow.1:chr6:+:83958583:84161036:Dysf:3-4-5-6:8-9-10-11-12-13-14-15-16-17-18	ES	E6,E8	E6,E7,E8	-3.20002	-1.44599	1.75403	0.000336742	0.00357021	0.962503	0.763355	-0.199148
uc007dcs.2,uc007dcu.2,uc007dcv.2,uc007dcw.2,uc007dcx.2,uc007dcy.2,uc007dcz.2,uc007dda.1,uc007ddb.2,uc011wui.1,uc011wuj.1:chr1:-:158734296:158869757:Ralgps2::4.5-6>	AFE	E1,E4	E3,E4	2.7831	0.589276	-2.19382	0.000338904	0.00358818	0.0866301	0.375073	0.288443
uc007mil.1,uc007mim.1,uc007min.1,uc007mio.1:chr11:+:115626746:115660347:2310067B10Rik::23	AFE	E22,E23	E2,E3,E4,E5,E6,E7,E8,E9,E10,E11,E12,E13,E14,E15,E16,E17,E18,E19,E20,E21,E23	-1.5373	-3.04623	-1.50893	0.000340858	0.00360389	0.300121	0.74141	0.44129
uc007awg.1,uc007awh.2,uc007awi.2,uc007awj.1:chr1:+:44204588:44238105:AK163166,Ercc5:3:	ALE	E3,E4	E3,E5,E6,E7,E8,E9,E10,E11,E12,E13,E14,E15,E16,E17,E18,E19	-0.80593	-3.89391	-3.08798	0.000345326	0.00364545	0.446778	0.0196239	-0.427154
uc009iif.1,uc009iig.1:chr7:+:99890223:99985627:Rab30::3-4-5-6>	AFE	E1,E3	E2,E3	-1.97155	0.257829	2.22938	0.000345739	0.00364545	0.953713	0.466104	-0.487609
uc008ioh.2,uc008ioi.2,uc008ioj.2:chr2:-:23365573:23427624:Spopl:4-5:7-8-9-10-11-12>	ES	E5,E7	E5,E6,E7	-20	-0.0923733	19.9076	0.00034773	0.0036514	1	0.59312	-0.40688
uc008mld.1,uc008mle.1,uc008mlf.1:chr2:+:131059802:131073760:Mavs::3-5-6-7-8-9>	AFE	E1,E3	E2,E3	0.466088	-0.982848	-1.44894	0.000347339	0.0036514	0.143025	0.436575	0.29355
uc008rrs.2,uc008rrt.2,uc008rru.1,uc008rrv.2:chr3:-:146392542:146475910:Prkacb::5-6-7-8-9-10-11-12-13>	AFE	E1,E5	E2,E5	-1.14384	0.968892	2.11273	0.000346922	0.0036514	0.798799	0.288989	-0.50981
uc008pvq.1,uc008pvr.1,uc012crz.1:chr3:+:88357637:88373647:Ubqln4,ubin:<1-2-3-4-5-6:	ALE	E6,E7	E6,E8,E9,E10,E11,E12	-1.31087	-3.03715	-1.72628	0.000348703	0.00365662	0.698973	0.254086	-0.444887
uc009coh.2,uc009coi.2,uc012eob.1:chr6:+:83745021:83752550:AK084646,Nagk:4:	ALE	E4,E5	E4,E6,E7,E8,E9,E10,E11,E12,E13,E14	-1.4585	-3.64469	-2.1862	0.000350149	0.00366677	0.139562	0.0135949	-0.125968
uc008mjw.1,uc008mjx.1,uc008mjy.1,uc008mjz.1,uc008mka.1,uc012cei.1:chr2:-:130533588:130665846:4930402H24Rik:<1-3-4-5-6-7-8:	ALE	E8,E10,E11,E12,E13,E14,E16,E17,E18,E19,E20,E21,E22,E23,E24,E26,E27,E28,E30,E31,E32,E33,E34,E35,E36,E37,E38,E39,E40,E41,E42	E8,E9	20	2.45283	-17.5472	0.000357515	0.00373372	1	0.806335	-0.193665
uc009tqi.2,uc009tqj.2,uc009tqk.2:chrX:-:73030992:73120509:Pls3::4-5-6-7-8-9-10-11-12-13-14-15-16-17-18>	AFE	E1,E4	E2,E4	0.12	2.53378	2.41378	0.000361068	0.00376571	0.414024	0.0485829	-0.365441
uc008ktx.1,uc008kty.1,uc008ktz.1,uc008kua.1,uc008kub.1:chr2:+:90780614:90857210:Celf1:<1:4-5-6-7-8-9-10-11	ES	E1,E4	E1,E3,E4	1.75284	0.257967	-1.49487	0.000363176	0.00378255	0.108102	0.331205	0.223102
uc008dtm.2,uc008dtn.2,uc008dto.2,uc008dtp.2,uc008dtq.2,uc008dtr.2,uc008dts.1:chr17:-:85462816:85489614:Prepl:<2.3:7-8-9-10-13-14-15-16	ES	E3,E7	E3,E4,E5,E7	-0.2634	-1.47306	-1.20966	0.000365384	0.00380039	0.29081	0.578059	0.287249
uc007mcd.1,uc007mce.1,uc011ygt.1:chr11:+:109224107:109262683:Gna13:4-5:7.8>	IR	E5,E7	E5,E6,E7	-0.883768	-0.0140847	0.869683	0.000367787	0.00382021	0.628904	0.427325	-0.201579
uc007ule.1,uc007ulf.2,uc007ulg.2,uc011znv.1:chr14:+:68334154:68360367:Kctd9::4-5-6	AFE	E2,E4	E3,E4	-3.46284	-1.53691	1.92593	0.000375026	0.00388488	0.846516	0.420743	-0.425773
uc008szw.2,uc008szx.2:chr4:-:59484739:59562236:Rod1:<1:3	ES	E1,E3	E1,E2,E3	2.02548	1.16954	-0.855943	0.000379517	0.00392171	0.101984	0.212373	0.110389
uc009cor.1,uc009cos.1,uc009cot.1,uc009cou.1,uc009cov.1,uc009cow.1:chr6:+:83958583:84161036:Dysf:8-9-10-11-12-13-14-15-16-17-18:20-21-22-23-24-26-27-28-29-30-31-32-33-35-36-37-38-39-40-41-42-43-44	ES	E18,E20	E18,E19,E20	1.70792	-0.0579314	-1.76585	0.000380113	0.00392171	0.16439	0.479016	0.314626
uc009grt.2,uc009gru.1:chr7:+:52151448:52155994:Fuz:7:9-10	IR	E7,E9	E7,E8,E9	1.19731	2.52403	1.32672	0.000379899	0.00392171	0.188243	0.0426418	-0.145601
uc009mfw.1,uc009mfx.1:chr8:-:74948081:74967677:Calr3::5-6-7-8-9-10>	AFE	E1,E2,E3,E5	E4,E5	20	0.952141	-19.0479	0.000383207	0.00394303	1	0.580408	-0.419592
uc009mrf.1,uc009mrg.1,uc012ghy.1:chr8:+:90723111:90783621:Papd5:<1:3-4-5-6-7-8-9-10-11-12-13-14>	A3SS	E1,E3	E1,E2,E3	1.96128	-0.915758	-2.87704	0.000389483	0.00400224	0.117426	0.684585	0.567159
uc009csd.1,uc009cse.1:chr6:+:86476264:86514443:AK005503,BC029726:2:4-5-6-7>	IR	E2,E4	E2,E3,E4	0.342945	-0.97601	-1.31895	0.000390208	0.00400426	0.211592	0.483994	0.272402
uc009jxb.1,uc009jxc.1:chr7:+:135020309:135029510:Zfp646::3-4-5>	AFE	E1,E3	E2,E3	2.28011	-0.257267	-2.53737	0.000392731	0.00401864	0.143507	0.709674	0.566166
uc009rrd.1,uc009rre.2,uc012hav.1:chr9:+:108756367:108815380:Slc26a6,slc26a6:4-5-6-7-8:10-11-12-13-14-15-16-17-18-19-20-21>	A5SS	E8,E10	E8,E9,E10	-1.50993	-4.01487	-2.50494	0.000393173	0.00401864	0.782956	0.97486	0.191904
uc008odj.1,uc008odk.1:chr2:+:172936335:172957771:AK041254,AK079954:<1:	ALE	E1,E2	E1,E3,E4,E5	-0.0918485	-1.90147	-1.80962	0.000394617	0.00402268	0.474837	0.125499	-0.349337
uc007uob.2,uc007uoc.2,uc007uod.2:chr14:-:70874361:70920067:Bmp1,mKIAA4159:6-7-8-9-10-11-12-13-14-15-16:19-20-21-22-23>	A3SS	E16,E19	E16,E18,E19	-1.69327	-0.570194	1.12308	0.000403515	0.00410793	0.621209	0.325703	-0.295506
uc007rpd.1,uc007rpe.1,uc007rpf.1,uc007rpg.1,uc007rph.1:chr13:-:99612035:99696339:Tnpo1::5-6-7-8-9-10-12-13-14-15-16-17-18-19-20-21-22-23-24-25-26-28-29>	AFE	E1,E5	E2,E3,E5	1.20539	2.79635	1.59096	0.000407699	0.00413959	0.229764	0.0684067	-0.161358
uc009mpf.1,uc009mpg.1,uc012ghq.1:chr8:+:87595655:87599060:Dhps::4-5-6-7-8-9-10>	AFE	E1,E2,E4	E3,E4	0.910295	1.87395	0.963653	0.000407703	0.00413959	0.563515	0.765527	0.202012
uc007zzd.1,uc007zze.1:chr16:-:92392197:92466391:Rcan1::3-4-5>	AFE	E1,E3	E2,E3	2.14466	-0.0042107	-2.14888	0.000410542	0.0041629	0.0593952	0.52045	0.461055
uc007tbx.2,uc007tby.2:chr14:-:37933631:37948508:Ghitm::3-4-5-6-7-8-9-10>	AFE	E1,E3	E2,E3	1.60543	3.17461	1.56918	0.000417813	0.00423105	0.108043	0.0160113	-0.0920317
uc008aot.2,uc008aou.2,uc008aov.1,uc012akw.1,uc012akx.1:chr17:+:15841930:15909576:Chd1:<1-2-3-4-5-7-8-10-11-12-13-14-15-16-17-18-19-20-21-22-23-24-25-27:	ALE	E27,E28	E27,E29,E30,E31,E32,E33,E34,E35,E36,E37,E38,E39,E40	-3.44224	-0.7781	2.66414	0.000422566	0.00426792	0.209444	0.880445	0.671002
uc008xay.1,uc008xaz.1:chr5:-:33995864:34000548:Tmem129:<1.2:4-5-6>	A5SS	E2,E4	E2,E3,E4	0.865684	1.98967	1.12399	0.000427904	0.00431615	0.244454	0.088211	-0.156243
uc007wlr.1,uc007wls.1:chr15:+:76527193:76530105:Gpt:16:18	IR	E16,E18	E16,E17,E18	1.97957	3.04288	1.06331	0.00043264	0.00433544	0.0857295	0.0250454	-0.0606841
uc008jaj.2,uc008jak.2,uc008jal.2,uc008jam.2,uc008jan.2,uc008jao.1:chr2:+:29745239:29787266:Odf2:9-10-11-12-13-14-15-16-17-19-21-22-23:	ALE	E23,E24	E23,E25,E26,E27,E28	-1.25181	-2.77005	-1.51824	0.000431829	0.00433544	0.713952	0.337145	-0.376807
uc008spr.2,uc008sps.2,uc008spt.2,uc008spu.2,uc008spv.2:chr4:-:43460595:43467498:Cd72:<1-2:5-6	ES	E2,E5	E2,E4	-0.614471	0.671594	1.28607	0.000438458	0.0043805	0.562254	0.266405	-0.295849
uc009ooz.2,uc009opa.2,uc009opb.1,uc012gpp.1:chr9:-:24216224:24307584:Dpy19l1:<1-3-4-5-7-8-9-10-11-12-13-14-15-16-17-18-19-20-22-23-24-25:27.28>	IR	E25,E27	E25,E26,E27	0.388482	-0.794595	-1.18308	0.000438849	0.0043805	0.103669	0.258803	0.155134
uc009dqn.2,uc009dqo.2:chr6:+:124254668:124280545:Cd163::17-18>	AFE	E1,E2,E3,E4,E5,E6,E7,E8,E9,E10,E11,E12,E13,E14,E15,E17	E16,E17	4.61847	1.61398	-3.00449	0.000440666	0.00439292	0.920602	0.11458	-0.806022
uc007xlv.2,uc007xlw.2,uc011zyq.1:chr15:+:97923019:97962878:Pfkm::4-5-6-7-8-9-10-11-12-13-14-15-16-17-18-19-20-21-22-23-24-25>	AFE	E2,E4	E3,E4	1.2083	-0.672046	-1.88035	0.000441299	0.00439353	0.370295	0.785312	0.415016
uc007hiz.2,uc011xpp.1:chr10:-:126733276:126748842:Mars:<1-2-3-4-5-6-7-8-9-10-11-12-13-14-15-16-17-18-19:21-22>	ES	E19,E21	E19,E20,E21	1.75051	0.489304	-1.26121	0.000443678	0.0044115	0.121494	0.342554	0.22106
uc008szu.1,uc012dew.1,uc012dex.1:chr4:-:59327554:59451505:OTTMUSG00000007332,Susd1:<12-13-14:18-19-20>	ES	E14,E18	E14,E16,E18	-0.481998	-2.22579	-1.74379	0.000446172	0.00443055	0.427673	0.751626	0.323952
uc007muo.2,uc007mup.2,uc007muq.1:chr11:+:120645585:120650416:Gps1::3-4-5-6-7-8-9-10-11-12-13-14	AFE	E1,E3	E2,E3	0.101684	1.89057	1.78889	0.000446997	0.00443301	0.237775	0.0608457	-0.176929
uc008kum.1,uc008kun.1,uc008kuq.1,uc008kus.2,uc008kut.2,uc008kuu.2,uc008kuv.2,uc008kuw.2,uc008kux.2,uc008kuy.2,uc008kuz.2,uc008kva.2,uc008kvb.2,uc012bzd.1,uc012bze.1,uc012bzf.1,uc012bzg.1,uc012bzh.1:chr2:-:90977516:91024025:Madd,mKIAA0358::3-4-6-7-8-9-10-11-12-13-14-16-18-19-20-22-23-24-25-30-31.32	AFE	E1,E3	E2,E3	-0.668689	0.914089	1.58278	0.000448902	0.00444616	0.498037	0.309209	-0.188827
uc009gsk.2,uc009gsl.1,uc012fjz.1:chr7:-:52246591:52254082:Bcl2l12:7:10-11>	A5SS	E7,E10	E7,E8,E9,E10	-0.0217136	-1.36995	-1.34823	0.000452442	0.00447544	0.293169	0.628898	0.335729
uc008oid.1,uc008oie.1,uc008oif.1,uc008oig.1,uc008oih.1,uc008oii.1,uc012clv.1,uc012clw.1:chr2:+:179805297:179820607:Gtpbp5:8-9:11.12	A5SS	E9,E10,E11	E9,E11	-0.672458	-1.66891	-0.996451	0.000453631	0.00448143	0.314495	0.142865	-0.171629
uc007bxi.1,uc007bxj.1,uc007bxk.1,uc007bxl.1,uc007bxm.1,uc007bxn.1,uc007bxo.1:chr1:+:89652645:89688997:APG16L,Atg16l1:13-15-16-17-18:20	IR	E18,E20	E18,E19,E20	0.101995	1.31608	1.21408	0.000455324	0.00449237	0.350237	0.106661	-0.243576
uc007xnb.1,uc007xnc.1,uc007xnd.1,uc011zza.1:chr15:+:98462650:98474961:Cacnb3:12:14-15-16-17>	IR	E12,E14	E12,E13,E14	1.78188	0.771771	-1.01011	0.000456433	0.00449754	0.0811063	0.182137	0.101031
uc007qif.2,uc007qig.2,uc007qih.1,uc011yza.1:chr13:-:48583028:48608805:Zfp169:<2.3:6-7-8-10.11.12>	A5SS	E3,E6	E3,E4,E5,E6	1.05646	2.62285	1.56639	0.000459978	0.00452666	0.211451	0.11839	-0.0930612
uc007mak.1,uc007mal.1,uc007mam.1,uc007man.1,uc007mao.1,uc007map.1,uc011ygq.1:chr11:-:107069205:107332034:M-rdgB beta,Pitpnc1::3-4.5-6-7-9-10-12	AFE	E1,E3	E2,E3	4.1332	0.947907	-3.18529	0.000461481	0.00453563	0.0491959	0.765046	0.715851
uc008yab.1,uc008yac.1:chr5:-:89088261:89105196:Grsf1::3-4-5-6-7-8-9-10-11>	AFE	E1,E3	E2,E3	2.29702	0.236246	-2.06078	0.000474808	0.00465615	0.204969	0.76113	0.556161
uc009mmk.1,uc009mml.1,uc012ghi.1:chr8:-:86781693:86794259:Ccdc130:<1-2-3-4-5-7-8-9:11>	ES	E9,E10,E11	E9,E11	2.10935	0.81225	-1.2971	0.000474956	0.00465615	0.850792	0.587231	-0.263562
uc007lmi.2,uc007lmj.2:chr11:-:100642044:100711899:Stat5b::3-4-5-6-7-8-9-10-11-12-13-14-15-16-17-18-19-20>	AFE	E1,E3	E2,E3	3.6653	1.6897	-1.9756	0.000480702	0.00470646	0.00596166	0.0690809	0.0631192
uc008yzz.1,uc008zaa.1,uc008zab.1,uc008zac.1,uc008zad.1:chr5:-:115177416:115223501:Git2:12-13-14-15-17-18:20-21-22-23>	ES	E18,E20	E18,E19,E20	-0.609611	-1.99367	-1.38406	0.000482975	0.0047227	0.586706	0.859048	0.272342
uc008xer.2,uc008xes.2,uc008xet.1,uc008xeu.2,uc008xev.1,uc008xew.2,uc008xex.1:chr5:-:36833252:36928875:Tbc1d14,kiaa1322::7-9	AFE	E5,E7	E6,E7	-0.440558	1.11667	1.55722	0.000484158	0.00472824	0.398133	0.117809	-0.280324
uc007ocu.2,uc007ocv.1,uc007ocw.2,uc007ocx.1,uc007ocz.1,uc011yoo.1:chr12:+:83270406:83552771:Sipa1l1::6	AFE	E4,E6	E5,E6	-1.21302	0.200671	1.41369	0.000485826	0.00473693	0.481189	0.157549	-0.323641
uc007rrc.1,uc007rrd.1,uc007rre.1:chr13:-:101387118:101421014:Rad17:<1:3-4-5	A5SS	E1,E3	E1,E2,E3	1.52524	3.27563	1.75039	0.000486477	0.00473693	0.122172	0.0230219	-0.0991502
uc007sjr.2,uc007sjs.2,uc007sjt.2,uc007sju.2,uc007sjv.2:chr14:-:21274482:21299355:Anxa7:<1:3-4-6-7	A5SS	E1,E3	E1,E2,E3	2.15857	0.990623	-1.16794	0.000486899	0.00473693	0.064032	0.180106	0.116074
uc008phm.1,uc008phn.2:chr3:-:57645816:57651679:Pfn2::3-4>	AFE	E1,E3	E2,E3	4.5581	2.10132	-2.45678	0.00049824	0.00483501	0.0198335	0.296161	0.276327
uc007mvs.1,uc011yjl.1:chr11:+:121120996:121171210:Foxk2:6-7:9>	ES	E7,E9	E7,E8,E9	-0.265244	-1.1009	-0.83566	0.000500147	0.00484127	0.41437	0.61333	0.19896
uc008bzc.2,uc008bzd.2,uc008bze.2,uc008bzf.2,uc008bzg.2,uc008bzh.2:chr17:-:33783177:33822403:Hnrnpm,mKIAA4193:9-10-11-12-13-14-15-16-17-18:20>	A3SS	E18,E20	E18,E19,E20	1.14093	2.17898	1.03805	0.000500043	0.00484127	0.179132	0.0672026	-0.11193
uc007yrm.2:chr16:-:21761357:21787907:Ehhadh:<1:3-4-5-6-7>	ES	E1,E3	E1,E2,E3	-0.763714	-2.42969	-1.66597	0.000501413	0.00484742	0.637571	0.906863	0.269292
uc008xbp.1,uc008xbq.1,uc008xbr.1:chr5:+:34326085:34327655:Gm1673:<3:6-7-8>	A5SS	E3,E6	E3,E4,E6	-0.281561	-2.38847	-2.10691	0.000504393	0.00486397	0.499185	0.878903	0.379718
uc009dnj.2,uc012erz.1:chr6:+:120413214:120433745:Il17ra:11:13-14-15>	IR	E11,E13	E11,E12,E13	-0.217499	0.849897	1.0674	0.00050406	0.00486397	0.404277	0.173817	-0.230461
uc007mnw.2,uc007mnx.2,uc007mny.2,uc007moa.2,uc007mob.2,uc007moc.1:chr11:+:117670980:117701222:Afmid,Clast2,Syngr2:12-13-14-15-16-17-18:	ALE	E18,E19	E18,E20	-1.07044	-2.69848	-1.62804	0.000505508	0.00486691	0.411274	0.176055	-0.235219
uc008juw.2,uc008jux.2,uc008juy.2,uc008juz.2,uc008jva.2,uc008jvb.2:chr2:+:61416642:61492226:Tank:15:	ALE	E15,E16,E17,E18	E15,E19	-2.70805	-1.53111	1.17694	0.000505966	0.00486691	0.0386462	0.0913675	0.0527213
uc008psg.1,uc008psh.1,uc008psi.1,uc008psj.1:chr3:+:87329499:87344078:Etv3:7-8:	ALE	E8,E10	E8,E9	3.58791	1.2865	-2.30141	0.00050729	0.00487354	0.957258	0.603037	-0.354221
uc007ltu.1,uc007ltv.1,uc007ltw.1,uc007ltx.1:chr11:+:103032451:103060214:Fmnl1,Fr1:<1-2-3-4-5-6-8-9-10-11-12:	ALE	E12,E13	E12,E14	-0.332124	-1.8016	-1.46947	0.000513236	0.00491835	0.291238	0.0804548	-0.210783
uc008ddd.2,uc008dde.2:chr17:+:56904173:56909516:Dus3l:5-6-7:9	IR	E7,E9	E7,E8,E9	-0.331371	0.618906	0.950276	0.000513234	0.00491835	0.442074	0.280993	-0.161081
uc008rhr.2,uc012cxn.1:chr3:-:127572605:127599241:5730508B09Rik:<1:3>	ES	E1,E3	E1,E2,E3	3.48092	1.61263	-1.86829	0.000516671	0.00494509	0.0260103	0.128549	0.102539
uc007fxm.1,uc007fxn.1:chr10:-:77649470:77707387:Trappc10:13-14-15:17-19-20-21-22-23-24-25-26>	IR	E15,E17	E15,E16,E17	0.665914	2.09676	1.43085	0.000517547	0.00494731	0.0990489	0.0284028	-0.0706462
uc007xyf.1,uc007xyg.1,uc012aak.1:chr15:+:103284255:103329231:Nckap1l:<1-2-3-4-5-6-7-8-9.10-11-12-13-14-15:	ALE	E15,E16	E15,E17,E18,E19,E20,E21,E22,E24,E25,E26,E27,E28,E29,E30,E31,E32,E33,E34	-1.66277	-3.92621	-2.26343	0.000520139	0.00495039	0.723021	0.161741	-0.561279
uc008fuf.2,uc008fug.2:chr18:+:83080270:83174706:Zfp516::3-4	AFE	E1,E3	E2,E3	-0.351398	-2.02815	-1.67675	0.00052023	0.00495039	0.639375	0.89822	0.258845
uc009dmd.1,uc009dme.1,uc009dmf.1,uc012erp.1:chr6:-:119303167:119367501:Adipor2::4-5-7-8-9-11-12>	AFE	E1,E4	E3,E4	0.436958	2.77892	2.34196	0.000520449	0.00495039	0.189413	0.0117579	-0.177655
uc009rzi.1,uc009rzj.1,uc009rzk.1:chr9:+:117949616:117978912:AZ2,Azi2:5-6-7:9>	A5SS	E7,E9	E7,E8,E9	0.108741	1.26039	1.15165	0.000519811	0.00495039	0.22506	0.041582	-0.183478
uc009fas.2,uc009fat.2,uc009fau.2,uc009fav.1:chr7:+:6124083:6144706:Zfp444:<1.2.3:6-8-9>	ES	E3,E6	E3,E4,E6	0.857002	-0.215094	-1.0721	0.000523587	0.00497407	0.220684	0.493986	0.273302
uc008wdz.1,uc008wea.1,uc008web.1,uc008wec.1:chr4:+:154998977:155024041:Cdk11b:<1.2:4	IR	E2,E4	E2,E3,E4	-2.11192	-0.346071	1.76584	0.000527552	0.00500555	0.814435	0.310873	-0.503562
uc008fph.2,uc008fpj.2,uc008fpk.1,uc012bex.1:chr18:+:74427941:74442338:Mbd1:13-14-15-16:	ALE	E16,E17	E16,E18	1.62265	-0.372638	-1.99529	0.00053482	0.00506405	0.657244	0.175175	-0.482069
uc008tfz.1,uc012dfx.1,uc012dfy.1:chr4:+:63017195:63020545:Orm3:<1:3	A3SS	E1,E3	E1,E2,E3	-1.21893	0.0252764	1.2442	0.000535037	0.00506405	0.694148	0.393449	-0.300699
uc007kqu.1,uc007kqv.1,uc007kqw.1,uc007kqx.1,uc011ybk.1,uc011ybl.1:chr11:-:84645862:84684281:DIF-3,Ggnbp2::5-7-8-9-11-12	AFE	E1,E2,E3,E5	E4,E5	1.59976	0.622298	-0.977458	0.000540604	0.00510415	0.617948	0.328997	-0.288952
uc007mxv.2,uc007mxw.2,uc007mxx.1,uc007mxy.1,uc007mya.1:chr12:+:4599813:4720758:Itsn2:<1-2-3-4-5-6-7-8-9-10-11-12-13-14-15-16-19-20-21-22-23-24-25-26-27-28-29-30:	ALE	E30,E31	E30,E32,E33,E34,E35,E36,E37,E38,E39	-2.19323	-0.815113	1.37812	0.000539993	0.00510415	0.0407514	0.128528	0.0877765
uc009uos.2,uc009uot.2:chrX:-:147240963:147248882:Maged2::3-4-5-6-7-8-9-10-11-12-13-14>	AFE	E1,E3	E2,E3	-0.208755	-1.39759	-1.18884	0.000546661	0.005155	0.611183	0.84264	0.231457
uc009lfs.1,uc009lft.1,uc009lfu.1,uc009lfv.1:chr8:-:26265023:26351373:Tacc1:3:7-8-9-10-11-12-13-14-15-16>	ES	E3,E7	E3,E4,E5,E7	-1.40058	-3.0671	-1.66652	0.000553907	0.00521692	0.455387	0.842914	0.387527
uc009obe.2,uc009obf.2,uc009obg.2,uc009obh.2,uc009obi.2:chr9:-:4294792:4309494:Aasdhppt:5:9-10-11>	ES	E5,E9	E5,E6	-3.13824	-1.88605	1.25218	0.00055848	0.00525355	0.90809	0.711438	-0.196652
uc007uef.2,uc007ueg.2,uc007ueh.2,uc007uei.1,uc007uej.1,uc011zmm.1,uc011zmn.1,uc011zmo.1,uc011zmp.1,uc011zmq.1,uc011zmr.1,uc011zms.1,uc011zmt.1:chr14:-:59966243:60059714:D14Ertd668e,Gm6907,Phf11,Setdb2:<1:	ALE	E1,E2	E1,E3,E4,E7,E9,E10,E11,E12,E13,E14,E16,E17,E18,E19	2.04514	-0.131556	-2.1767	0.000560205	0.00526333	0.977469	0.85684	-0.120629
uc007itr.1,uc007its.1,uc007itt.1,uc007itu.1:chr11:+:51076672:51095266:Clk4:4.5:7	IR	E5,E7	E5,E6,E7	-2.58925	-0.589312	1.99994	0.000564713	0.00529919	0.757381	0.285154	-0.472226
uc008vbz.2,uc008vca.2:chr4:-:132455127:132478466:Fam76a:<1-2-3-4-5:7-8-9>	ES	E5,E7	E5,E6,E7	-0.0695338	-1.62838	-1.55885	0.000572473	0.00535238	0.458479	0.78821	0.329731
uc009pkj.2,uc009pkk.2:chr9:-:50559176:50560459:Hspb2:<1:3>	A3SS	E1,E3	E1,E2,E3	-0.0637264	-1.9747	-1.91097	0.000574404	0.0053639	0.328088	0.770742	0.442655
uc007dsc.1,uc007dsd.1,uc007dse.1,uc007dsf.1,uc007dsg.1,uc007dsh.1,uc007dsi.2,uc007dsj.1:chr1:-:175850533:175872623:Ifi203:7-8:10-12>	IR	E8,E10	E8,E9,E10	-2.37292	-0.300723	2.0722	0.000587019	0.0054738	0.630626	0.205302	-0.425325
uc007tnv.2,uc007tnw.2,uc007tnx.2,uc007tny.1,uc011zkh.1:chr14:-:52625751:52640408:Zfp219:<1:7-8-9>	ES	E1,E7	E1,E6	0.591364	-1.02962	-1.62098	0.0005876	0.0054738	0.305069	0.663702	0.358633
uc009qmr.1,uc009qms.1,uc009qmt.1,uc009qmu.1,uc009qmv.1,uc012gwf.1,uc012gwg.1:chr9:+:67688202:67843441:Vps13c:<31-32-33-34-35-36-37-38-39-40-41-42-43-44-45-46-47-48-49-50-51-52-53-54-55-56-57-58:60-61-62-63-64-65-66-67-68-69-70-71-72-73-74-75-77-78-79-81-83-84-87-88-89-90>	ES	E58,E60	E58,E59,E60	-1.68767	-4.50189	-2.81422	0.000595819	0.00553694	0.811859	0.986883	0.175023
uc007jfi.1,uc007jfj.1:chr11:-:59784118:59859987:Pemt:<1:4-5-6-7-8>	ES	E1,E4	E1,E3,E4	-1.33447	-2.71824	-1.38376	0.000600778	0.00557508	0.727097	0.923812	0.196715
uc007wbw.2,uc007wbx.2,uc007wby.2,uc007wbz.2,uc007wca.1,uc007wcb.1,uc007wcc.1,uc007wcd.1,uc011ztu.1:chr15:-:73035534:73253710:FAK,Ptk2::8-9-10-11-12-14-15-16-17-18-19-20-23-25-26-27-28-29-30-31-32-33-34-35-36-37-38	AFE	E2,E3,E8	E5,E8	20	1.52273	-18.4773	0.000601376	0.00557508	1	0.760133	-0.239867
uc009dsw.1,uc009dsx.1,uc009dsy.1,uc009dsz.1,uc009dtb.1,uc009dtc.1:chr6:+:124959255:124987887:Zfp384:7:9	IR	E7,E9	E7,E8,E9	0.498276	1.54135	1.04308	0.000603096	0.00558427	0.261169	0.102121	-0.159048
uc007grp.2,uc007grq.2,uc007grr.2,uc007grs.2,uc011xlh.1:chr10:-:87935557:87966715:Chpt1:11:	ALE	E11,E12	E11,E13	-0.703324	0.975754	1.67908	0.000606438	0.00560665	0.0473473	0.20157	0.154223
uc008gev.2,uc008gew.2,uc008gex.2,uc008gey.2,uc012bhc.1:chr19:-:5707373:5726317:Ehbp1l1:<1-2-3-4-5-6:8-9	ES	E6,E8	E6,E7,E8	2.23796	1.07673	-1.16122	0.000606973	0.00560665	0.0821809	0.212306	0.130125
uc007kkf.1,uc007kkg.1:chr11:-:78828302:78959856:Ksr1::4-5>	AFE	E1,E2,E4	E3,E4	1.37536	-0.227543	-1.6029	0.000609167	0.00560958	0.656461	0.244039	-0.412422
uc008ntr.1,uc008nts.1:chr2:-:163879276:163896849:Tomm34:<2:4-5-6	A5SS	E2,E4	E2,E3,E4	-0.597734	0.698326	1.29606	0.000609181	0.00560958	0.384247	0.131317	-0.25293
uc008jgp.1,uc008jgq.1,uc008jgr.1:chr2:+:32576591:32610514:Sh2d3c:4:6-7-8-9-10-11-12-13-14>	ES	E4,E6	E4,E5,E6	0.602882	2.04684	1.44396	0.000612023	0.00562621	0.160368	0.041124	-0.119244
uc008njk.1,uc008njl.1:chr2:-:154385374:154395588:E2f1::3-4-5-6-7-8>	AFE	E1,E3	E2,E3	0.697301	-1.0911	-1.7884	0.000616761	0.00566299	0.339093	0.623206	0.284112
uc007bee.2,uc007bef.2,uc007beg.2:chr1:-:60133711:60155344:Wdr12::4-5-6-7-8-9-10-11-12-13-14-15-16>	AFE	E1,E4	E3,E4	1.62112	0.0743272	-1.54679	0.000618922	0.00566927	0.229193	0.645268	0.416075
uc008okj.2,uc008okk.2,uc008okl.2,uc008okm.2,uc008okn.2,uc008oko.2:chr2:+:180701929:180717229:Arfgap1:<1.2:4	IR	E2,E4	E2,E3,E4	-0.392869	-1.41508	-1.02221	0.000618909	0.00566927	0.448133	0.685648	0.237515
uc009dfn.1,uc009dfo.1,uc009dfp.1,uc009dfq.1,uc009dfr.1:chr6:-:113316654:113327514:Tada3:3-4:6.7	IR	E4,E6	E4,E5,E6	0.789536	1.9044	1.11486	0.000620527	0.00567719	0.251528	0.0876586	-0.163869
uc009rlv.1,uc009rlw.1,uc009rlx.1,uc009rly.1,uc009rlz.1,uc009rma.1,uc009rmb.1,uc012hai.1:chr9:+:107479282:107486379:Hyal1,Nat6:<1-2-3-4:6	IR	E4,E6	E4,E5,E6	-1.8897	-3.57806	-1.68836	0.000622831	0.00569148	0.570513	0.880426	0.309913
uc009fyu.1,uc009fyv.1:chr7:+:29178014:29184402:Paf1:<1-2-3-4:6-7-8-9-10-11-12-13-14-15>	IR	E4,E6	E4,E5,E6	1.11375	2.58219	1.46844	0.000627732	0.00572945	0.16556	0.0331373	-0.132422
uc008pem.2,uc008pen.2,uc008peo.2:chr3:-:52786044:52821145:Cog6::16-17-18-19-20-21>	AFE	E1,E2,E3,E4,E5,E6,E7,E8,E9,E10,E11,E12,E13,E16	E15,E16	1.44743	3.69988	2.25245	0.000633366	0.00577401	0.713413	0.980587	0.267174
uc007xwf.2,uc007xwg.2,uc007xwh.2,uc007xwi.1:chr15:+:102348676:102354107:Tarbp2:5.6-7-8-9-10:12>	IR	E10,E12	E10,E11,E12	-0.177105	0.70992	0.887025	0.000649829	0.00589434	0.429853	0.239353	-0.1905
uc007ynx.1,uc007yny.1,uc007ynz.1,uc012acg.1:chr16:+:18426509:18479166:TXNRD2,Txnrd2:<1-3-4-5:	ALE	E5,E6	E5,E7,E8,E9,E10,E11,E12,E13,E15,E16	-1.50071	-2.68751	-1.1868	0.000648318	0.00589434	0.506418	0.19719	-0.309228
uc008mlg.2,uc008mlh.2,uc008mli.1,uc008mlj.1,uc012cel.1:chr2:+:131088235:131124924:Pank2:<1:5.6	ES	E1,E5	E1,E4,E5	2.94703	0.611289	-2.33574	0.00064799	0.00589434	0.0108092	0.209632	0.198823
uc008zqk.1,uc008zql.1,uc008zqm.1,uc008zqn.1,uc012edp.1:chr5:+:125079647:125202517:Atp6v0a2::19.20-21-22-23-24-25>	AFE	E14,E15,E16,E19	E18,E19	1.49599	3.18116	1.68518	0.000649884	0.00589434	0.881072	0.980334	0.099262
uc009dim.2,uc009din.2,uc009dio.2,uc009dir.1:chr6:+:115084919:115232644:Syn2:<5-6-8-9-10-11-12-13:	ALE	E13,E14	E13,E15,E17	-2.10082	-0.641487	1.45933	0.000650404	0.00589434	0.0860611	0.304282	0.218221
uc009iek.1,uc009iel.1,uc009iem.1,uc009ien.1:chr7:-:91763563:91838363:Awp1,Zfand6::4	AFE	E1,E4	E2,E4	3.31446	1.34938	-1.96507	0.000651376	0.00589618	0.00740753	0.25658	0.249173
uc007kdf.1,uc007kdg.1:chr11:-:74989444:75003985:Dph1,Ovca2:<1-2-3-4-5-6-7-8-9-10-11-13:15>	A5SS	E13,E15	E13,E14,E15	-1.88014	-0.84719	1.03295	0.000655256	0.00592431	0.738257	0.613364	-0.124893
uc009dtx.1,uc009dty.1,uc009dtz.1,uc009dub.1,uc012esv.1:chr6:+:125165598:125192045:AK080173,E130112N10Rik,Vamp1:<1-2-3-4:6>	IR	E4,E6	E4,E5,E6	-4.39273	-1.41089	2.98183	0.00066415	0.00599766	0.996612	0.730064	-0.266548
uc008xcp.1,uc008xcq.1,uc008xcr.1,uc008xcs.1:chr5:+:34916362:34974954:ADD1,Add1:<1-2-3-4-5-6-7-8-9-10:	ALE	E10,E11	E10,E12,E13	-1.55688	-3.87041	-2.31353	0.000673868	0.00607828	0.268805	0.0138189	-0.254986
uc009dvw.1,uc009dvx.1,uc009dvy.1,uc009dvz.1:chr6:+:127396857:127444257:Parp11::3-4	AFE	E1,E3	E2,E3	-2.08602	0.162067	2.24809	0.000678638	0.00611411	0.938874	0.611755	-0.327119
uc008aci.2,uc008ack.2,uc008acm.1,uc008acn.2:chr16:-:96213698:96304035:Brwd1,Wdr9:<1-2-3-4-5:	ALE	E5,E6	E5,E7,E8,E9,E10,E11,E12,E13,E14,E15,E16,E17,E18,E19,E20,E21,E22,E23,E24,E25,E26,E27,E28,E29,E30,E31,E32,E33,E34,E35,E36,E37,E38,E39	-1.50589	-0.0977516	1.40814	0.000684634	0.00615369	0.318011	0.643686	0.325675
uc009jwg.1,uc009jwh.1,uc009jwi.1,uc009jwj.1:chr7:-:134750545:134758774:Zfp629,mKIAA0326:<1.2:	ALE	E2,E3	E2,E6	0.914135	-0.743317	-1.65745	0.000683846	0.00615369	0.639893	0.272746	-0.367147
uc007nxm.1,uc007nxn.1,uc007nxo.1,uc007nxp.1,uc007nxq.1,uc007nxr.1,uc007nxs.1,uc007nxt.1,uc011ynv.1,uc011ynw.1,uc011ynx.1:chr12:+:76919304:77211915:Syne2,mKIAA1011::107-108-109-110-111-112-113	AFE	E106,E107	E35,E36,E37,E38,E39,E40,E41,E42,E43,E44,E45,E46,E47,E48,E49,E50,E51,E52,E53,E54,E55,E56,E57,E58,E59,E60,E61,E62,E63,E64,E65,E66,E67,E68,E69,E70,E71,E72,E73,E74,E75,E76,E77,E78,E79,E80,E81,E82,E83,E84,E85,E86,E87,E88,E89,E90,E91,E92,E93,E94,E95,E96,E97,E98,E99,E100,E101,E102,E103,E104,E105,E107	-3.76359	-1.52873	2.23486	0.000689336	0.0061887	0.427453	0.0201146	-0.407339
uc008wxx.1,uc008wxz.2:chr5:+:31554072:31555570:Krtcap3:<2:4-5-6-7-8>	IR	E2,E4	E2,E3,E4	-1.04462	-3.46271	-2.41809	0.000691611	0.00620188	0.661371	0.954498	0.293127
uc007ofo.2,uc007ofp.2,uc011yoz.1:chr12:-:85943480:85958416:Abcd4:<2:6-7	ES	E2,E6	E2,E4,E5,E6	-1.15332	-2.78991	-1.63659	0.000693169	0.0062086	0.633192	0.943286	0.310094
uc007brx.1,uc007bry.1,uc007brz.1,uc007bsa.1,uc007bsb.1,uc007bsc.1,uc011woa.1:chr1:+:82721492:82748964:Mff:6:8	ES	E6,E8	E6,E7,E8	0.0954418	-0.657661	-0.753103	0.000698927	0.00625164	0.365474	0.53718	0.171706
uc008rlw.1,uc008rlx.1,uc008rly.1,uc012cye.1,uc012cyf.1,uc012cyg.1:chr3:-:135247618:135354511:Nfkb1::16-17-18-19-20-21-22-23-24-25-26	AFE	E1,E2,E3,E4,E5,E6,E8,E9,E10,E11,E12,E13,E16	E15,E16	0.690227	2.08402	1.3938	0.000699604	0.00625164	0.184073	0.511697	0.327624
uc007tnz.1,uc011zki.1:chr14:+:52636539:52639462:G630016D24Rik:<1-2-3-4-5:7-8>	IR	E5,E7	E5,E6,E7	-2.07944	0.869038	2.94848	0.000702687	0.00627189	0.897803	0.247049	-0.650754
uc008bvh.2,uc008bvi.2,uc008bvj.2:chr17:+:31701717:31744638:Pknox1:<1:4-5-6-7-8-9-10-11-12-13>	ES	E1,E4	E1,E2,E4	0.357083	1.70529	1.34821	0.000712072	0.00634827	0.253372	0.0934427	-0.15993
uc007mac.1,uc007mad.1,uc007mae.2,uc007maf.1,uc007mag.1:chr11:-:106894394:106993236:Bptf:25-26-27:29-30-31	ES	E27,E29	E27,E28,E29	-0.0208052	-0.970831	-0.950026	0.000716699	0.00637472	0.381645	0.605929	0.224283
uc009tyr.1,uc009tys.1,uc009tyt.1:chrX:-:99709313:99839585:Phka1:<1-2-3-4-5-6-7-8-9-10-11-12-13-14-15-16-17-18:20-21-23-24-25-26-27-28-29-30-31-32-33-34>	ES	E18,E20	E18,E19,E20	-18.2248	-1.3138	16.911	0.000716672	0.00637472	1	0.693281	-0.306719
uc007lth.1,uc007lti.1,uc007ltj.1,uc007ltk.1,uc007ltl.1,uc007ltm.1,uc007ltn.1:chr11:+:102963001:102973513:Acbd4:6:8-9-11-12-13-14	ES	E6,E8	E6,E7,E8	-2.30384	-1.55588	0.747959	0.000721904	0.00641358	0.879982	0.766134	-0.113848
uc007lea.1:chr11:+:97223864:97259856:Socs7:3:	ALE	E3,E4	E3,E5,E6,E7,E8,E9,E10	-3.29799	-1.43898	1.85901	0.000728232	0.00645486	0.453513	0.926574	0.473061
uc008rjr.2,uc008rjs.2,uc008rjt.2,uc008rju.2:chr3:+:131227731:131306635:Papss1:<1:4-6-7-8-9-10-11-12-13-14-15>	ES	E1,E4	E1,E3,E4	1.28776	0.273411	-1.01435	0.000729127	0.00645534	0.13227	0.297317	0.165047
uc007whj.1,uc007whk.1,uc007whl.1,uc007whm.1,uc007whn.1,uc007who.1:chr15:-:75725229:75739770:Eef1d:7:10-11-12-13-14>	ES	E7,E10	E7,E9,E10	2.01002	0.861225	-1.14879	0.000730893	0.00646352	0.0577768	0.220631	0.162854
uc007wba.1,uc007wbb.1:chr15:-:66934436:67008444:St3gal1:<1:3-4-5-6-7-8-9-10>	ES	E1,E3	E1,E2,E3	1.97812	1.18405	-0.794066	0.000742741	0.00656074	0.0980934	0.190658	0.0925648
uc008crn.2,uc008cro.2,uc008crp.2,uc008crq.1,uc008crr.2,uc012aui.1,uc012auj.1,uc012auk.1:chr17:-:46153942:46169326:Vegfa:6-7:10	ES	E7,E10	E7,E8,E10	-0.0364838	-0.856719	-0.820235	0.000750752	0.00661628	0.450943	0.642637	0.191695
uc008elb.1,uc008elc.1,uc008eld.1,uc012bbc.1:chr18:-:34790604:34811390:Cdc23:<1-2-4-5-6-7-8-9-10-11-12-13-14-15-16-17:	ALE	E17,E18	E17,E19	1.86286	3.63691	1.77405	0.000750322	0.00661628	0.491995	0.887375	0.39538
uc008lfq.1,uc008lfr.1,uc008lfs.1:chr2:+:93027740:93041914:Trp53i11:<1:3	ES	E1,E3	E1,E2,E3	1.97656	3.60641	1.62985	0.000752785	0.00662658	0.0801417	0.0170839	-0.0630578
uc008psg.1,uc008psh.1,uc008psi.1,uc008psj.1:chr3:+:87329499:87344078:Etv3:3:5	IR	E3,E5	E3,E4	-0.131336	-1.64223	-1.51089	0.000758769	0.00667161	0.525702	0.840454	0.314752
uc008nya.1,uc008nyb.1,uc008nyc.1,uc008nyd.1,uc008nye.1,uc008nyf.1,uc008nyg.1,uc008nyh.1:chr2:-:165609653:165722450:Zmynd8,mKIAA1125:24-25-26-27:29-30-31-32-33-34	A5SS	E27,E29	E27,E28,E29	1.26797	0.486184	-0.781782	0.00076877	0.00675181	0.147974	0.27254	0.124566
uc008dym.2,uc008dyn.2,uc008dyo.2,uc008dyp.2,uc008dyr.2,uc008dys.2,uc012ayz.1,uc012aza.1:chr18:+:4920537:5119291:Svil:<1:	ALE	E1,E2	E1,E3,E4,E5,E6,E7	0.36956	-3.07299	-3.44254	0.000772405	0.00677598	0.897761	0.158411	-0.73935
uc007axm.1,uc007axn.1,uc007axo.1,uc007axp.1:chr1:-:51522850:51535263:Nabp1,Obfc2a:6-7-8-9-10:12	IR	E10,E12	E10,E11,E12	-3.42921	-1.06807	2.36114	0.000778417	0.00682092	0.891422	0.34678	-0.544642
uc007atr.1,uc007ats.1,uc011wjv.1,uc011wjw.1,uc011wjx.1:chr1:+:39957757:40083155:Map4k4:19-20-21:23-24	ES	E21,E23	E21,E22,E23	-0.176521	-1.18205	-1.00553	0.0007871	0.00687419	0.548277	0.7556	0.207322
uc007lth.1,uc007lti.1,uc007ltj.1,uc007ltk.1,uc007ltl.1,uc007ltm.1,uc007ltn.1:chr11:+:102963001:102973513:Acbd4:<3:6	ES	E3,E6	E3,E4	-2.69581	-1.72879	0.96702	0.000787183	0.00687419	0.914667	0.785755	-0.128912
uc007mmn.2,uc007mmo.2:chr11:-:116711210:116714408:Srsf2:<1-2:4	ES	E2,E4	E2,E3,E4	2.32519	1.04479	-1.2804	0.000786252	0.00687419	0.0548153	0.136319	0.0815037
uc009qyy.1,uc009qyz.1,uc012gya.1:chr9:-:88583442:88614636:100039707,Gm2382::3	AFE	E1,E3	E2,E3	2.99783	1.41096	-1.58687	0.000788702	0.00687963	0.070763	0.312215	0.241452
uc007qcw.2,uc007qcx.2,uc007qcy.2,uc007qcz.1,uc007qda.2,uc007qdb.2:chr13:+:37917906:38043874:Rreb1:9-10-11-12-13-14:17-18>	ES	E14,E17	E14,E16,E17	-0.21752	-0.816612	-0.599092	0.000794809	0.00692503	0.426279	0.568728	0.142449
uc007xll.1,uc007xlm.1,uc007xln.1,uc011zyp.1:chr15:+:97794659:97800706:AK177749,Tmem106c:<1.2.3:7.8-9-10-11-12-13-14>	A5SS	E3,E7	E3,E4,E7	-0.645297	0.28419	0.929487	0.000796406	0.00693108	0.503631	0.313808	-0.189822
uc007lel.2,uc007lem.2,uc007len.2:chr11:-:97550136:97561811:Pcgf2::6-7-8-9-10-11-12-13-14>	AFE	E1,E2,E6	E3,E4,E6	1.11445	-0.680209	-1.79466	0.000799497	0.0069501	0.400863	0.777151	0.376288
uc008juq.2,uc008jur.2,uc008jus.2,uc008jut.2,uc008juu.2,uc008juv.1:chr2:-:60590009:60801261:Rbms1:4-5-6-7-9-10-11-12:15-16-17-18-19>	ES	E12,E15	E12,E14,E15	0.209622	1.28765	1.07803	0.000802206	0.00696576	0.404761	0.174149	-0.230611
uc009max.2,uc009may.1:chr8:-:73121388:73132771:Ssbp4:<2-3-4-5-6:8-9-10-11-12-13-14-15-16-17	ES	E6,E8	E6,E7,E8	-2.0007	-0.887916	1.11279	0.000803863	0.00697226	0.858546	0.666065	-0.192481
uc009iok.1,uc009iol.1,uc009iom.1,uc009ion.1,uc009ioo.1:chr7:+:108496582:108561100:Arap1:18-19-20-21-22-23-24-25-26-27-28-29-30-31-32:34-35-36-37-38>	ES	E32,E34	E32,E33,E34	0.273529	1.32663	1.05311	0.000811584	0.00701135	0.379602	0.161576	-0.218026
uc007eza.2,uc007ezd.2,uc007eze.2,uc011xdi.1:chr10:+:42580317:42680588:Scml4:<1:4-5	ES	E1,E4	E1,E2,E3,E4	-2.35063	-4.67277	-2.32214	0.000817692	0.00705237	0.824456	0.989664	0.165208
uc007git.1,uc007giu.1,uc007giv.1:chr10:-:81053649:81063645:Tle6::7-8>	AFE	E4,E7	E5,E7	-20	-0.336472	19.6635	0.000821804	0.00707206	1	0.534976	-0.465024
uc007yxo.1,uc007yxp.1,uc007yxq.1,uc007yxr.1,uc007yxs.1,uc007yxt.1,uc007yxu.1:chr16:+:31663528:31873430:Dlg1,mKIAA4187:<2-3-4-5-6:9-10-11-12-13-14	ES	E6,E9	E6,E8,E9	-2.80299	-1.40011	1.40288	0.000822357	0.00707206	0.934411	0.742854	-0.191557
uc008ijt.1,uc008iju.1,uc012bqx.1:chr2:+:12845667:12925080:Pter:<1:3-4-5.6-7>	ES	E1,E3	E1,E2,E3	0.0607488	-1.34206	-1.40281	0.00082274	0.00707206	0.41745	0.736538	0.319088
uc008qbm.1,uc008qbn.1:chr3:+:90017636:90029885:Rab13::3-4-5-6-7-8-9>	AFE	E1,E3	E2,E3	-4.68955	-2.26936	2.4202	0.000841861	0.00722833	0.984683	0.83472	-0.149963
uc009tuk.2,uc009tul.2,uc009tum.2,uc009tun.2,uc009tuo.2,uc009tup.2:chrX:+:93650774:93769823:Heph::3-4-5-6-7-8-9-11-12-14.15-16-17-18-19-20-22-23-24-25-26	AFE	E1,E3	E2,E3	1.09861	-1.34373	-2.44235	0.000843194	0.00723168	0.362809	0.783222	0.420413
uc008syh.1,uc008syi.1,uc008syj.2,uc008syk.2,uc008syl.2,uc008sym.2,uc008syn.2,uc012dep.1:chr4:+:57722683:57909856:Akap2,Palm2:6:9>	ES	E6,E9	E6,E7,E9	1.15588	0.403975	-0.751901	0.000845168	0.00724052	0.155266	0.275424	0.120158
uc008cgb.1,uc008cgc.1,uc008cgd.1,uc008cge.1,uc008cgf.1,uc008cgg.1,uc008cgh.1:chr17:+:35272186:35284181:Bat3:18-19-20-21-22-23-24-25-26-27-28:30>	ES	E28,E30	E28,E29,E30	-2.35479	-1.15062	1.20417	0.000853634	0.00729506	0.851676	0.661518	-0.190158
uc008rpl.2,uc008rpm.1,uc008rpo.2,uc012cyw.1:chr3:-:143851493:143868219:Lmo4:<2.3:	ALE	E3,E4	E3,E5,E7,E8,E9	-2.22169	-4.21931	-1.99763	0.000854385	0.00729506	0.255116	0.0125259	-0.24259
uc009orj.1,uc009ork.1,uc009orl.1,uc009orm.1,uc009orn.1,uc012gpu.1:chr9:-:30957141:31019400:Aplp2:<1-2-3-4-5-6:8-10-11-12-13-14	ES	E6,E8	E6,E7,E8	-3.50539	-1.95346	1.55193	0.000853483	0.00729506	0.971252	0.846427	-0.124825
uc008rgt.1,uc008rgu.1,uc008rgv.1,uc008rgw.1,uc008rgx.1,uc008rgy.1,uc008rgz.1,uc008rha.1,uc008rhb.1,uc012cxg.1:chr3:-:126624524:127202033:AK081244,Ank2:<19-21-22-23:25-26-27-28-30-31-32-34.35-36-37-39-40-41-42-43-44-45-46-47-51-52-53-54-55-56-57-58-59>	ES	E23,E25	E23,E24,E25	-20	-0.325806	19.6742	0.000859547	0.00733098	1	0.479519	-0.520481
uc007xld.1,uc007xle.1,uc007xlf.1,uc007xlg.1,uc007xlh.1,uc007xli.1,uc007xlj.1,uc011zyn.1,uc011zyo.1:chr15:-:97623111:97674733:HDAC7,Hdac7:5-6-7-8.9-10-11:13-14	ES	E11,E13	E11,E12,E13	0.308479	1.18536	0.876878	0.00086957	0.00740823	0.327453	0.183446	-0.144007
uc008zzx.2,uc008zzy.2,uc008zzz.2:chr5:-:136598935:136611944:Lrwd1:<1-2-3:5-6-8-9-10-11-12-13	IR	E3,E5	E3,E4,E5	0.629742	1.90676	1.27701	0.000874684	0.00744354	0.153981	0.0439406	-0.11004
uc008uaq.1,uc008uar.1,uc012did.1:chr4:-:107687397:107704695:Podn:5-6-7-8:10-11-12-13-14-15>	IR	E8,E10	E8,E9,E10	0.672032	1.44587	0.773834	0.000879053	0.00747244	0.112637	0.0513289	-0.0613083
uc009roi.2,uc009roj.2,uc009rok.2,uc009rol.1,uc009ron.1,uc009roo.1,uc009roq.1:chr9:-:107954002:107982071:Kpc1,Rnf123:16-17-18-19-20-21-22-23-24-25-26-27:29-30-31-33-34-35-36-37-38-39-40	A5SS	E27,E29	E27,E28,E29	0.279649	0.929556	0.649906	0.000880527	0.00747669	0.412203	0.240256	-0.171947
uc007yym.2,uc012aej.1:chr16:+:32247312:32257169:Wdr53::4-5>	AFE	E1,E2,E4	E3,E4	2.39221	0.677239	-1.71497	0.0008859	0.00750075	0.987271	0.924858	-0.0624129
uc008dqx.2,uc008dqy.2,uc008dqz.2,uc008dra.2,uc008drb.1,uc008drc.1:chr17:-:80637643:80689816:Dhx57:<1-3-4-5-6-7-8-9-10-11-12-13-14-15-16-17:	ALE	E17,E18	E17,E20,E21,E23,E24,E25,E26,E27,E28	-1.09982	-2.46204	-1.36222	0.000886292	0.00750075	0.435814	0.155245	-0.280569
uc009cnn.2,uc009cno.2,uc009cnp.2:chr6:-:83430207:83456963:Dguok:3-4-6:8	IR	E6,E8	E6,E7,E8	0.0749722	1.11686	1.04189	0.000884442	0.00750075	0.259033	0.11634	-0.142693
uc007lfr.2,uc007lfs.2,uc007lft.2,uc007lfu.2,uc007lfv.1,uc007lfw.1,uc007lfx.1:chr11:+:98064618:98139845:AK047916,AK141527,Cdk12:21:	ALE	E21,E22	E21,E24,E25,E26,E27	0.42198	-0.876297	-1.29828	0.000887788	0.00750513	0.4489	0.142691	-0.30621
uc008mja.2,uc008mjb.2,uc012cef.1,uc012ceg.1:chr2:+:130250055:130270005:Vps16,mVps16:12-13-14.15:17	IR	E15,E17	E15,E16,E17	-0.260013	1.1873	1.44732	0.000893187	0.00753896	0.483318	0.183147	-0.300171
uc009ilg.1,uc009ilh.1,uc009ili.1:chr7:+:106415956:106485647:Mtap6:<1-2:	ALE	E2,E3,E4	E2,E5	-1.05931	0.416773	1.47608	0.000911338	0.00767043	0.114783	0.372824	0.258041
uc008oxk.2,uc008oxl.2,uc008oxn.2:chr3:+:33919000:33968266:Fxr1:14-15-16:18	ES	E16,E18	E16,E17,E18	0.662489	-0.927613	-1.5901	0.000918486	0.00772212	0.305714	0.64164	0.335925
uc007zjb.2,uc007zjc.1,uc012agi.1,uc012agj.1:chr16:-:45746345:45953711:Phldb2::15-16-17-18-19-20-21-22>	AFE	E12,E13,E15	E9,E10,E11,E15	0.503952	-1.75732	-2.26127	0.000927299	0.00778769	0.750353	0.241713	-0.50864
uc009lqe.1,uc009lqf.1:chr8:+:47556395:47621404:Acsl1::3-4-5-6-7-8-9-10-11-12-13-14-15-16-17-18-19-20-21-22>	AFE	E1,E3	E2,E3	3.45243	1.57527	-1.87716	0.000929362	0.00779648	0.0300999	0.529151	0.499051
uc008pqe.1,uc008pqf.1,uc008pqg.2,uc008pqx.2,uc012cra.1:chr3:-:84299985:85691440:Arfip1,Glt28d2:<1:	ALE	E1,E2	E1,E4,E6	0.559616	-1.30833	-1.86795	0.000939584	0.00787363	0.174776	0.03474	-0.140036
uc009anb.1,uc009anc.1:chr5:-:147020779:147033013:Rnf6::3-4-5-6>	AFE	E1,E3	E2,E3	20	2.34355	-17.6565	0.000944199	0.00790368	0	0.455709	0.455709
uc009cmz.2,uc009cna.2,uc009cnc.1:chr6:+:83115917:83150112:Dctn1:<1-3-4-5:9-10-11-12-13-14-15-16-17-18-19-20-21-22-23-24-25-26-27-29-30-31-32-33>	ES	E5,E9	E5,E8,E9	3.09078	1.20474	-1.88604	0.000950558	0.00794824	0.0252081	0.168952	0.143744
uc008pnl.1,uc008pnm.1,uc008pnn.1:chr3:-:78866450:78977120:Rapgef2:<2-3-7-9-10-11-12-13-14-15-16-17-18-19-20-21-22:24-25-26-27-28-29-30>	ES	E22,E24	E22,E23,E24	-0.214729	-1.73695	-1.52222	0.000951988	0.00795153	0.599862	0.861856	0.261995
uc009myk.2,uc009myl.2,uc009mym.2:chr8:-:97969995:98012720:Csnk2a2:6-7-8-9-10-11-12:	ALE	E12,E13	E12,E14	-0.59399	0.168351	0.762341	0.000954413	0.00796312	0.333203	0.515214	0.182011
uc008fng.1,uc008fnh.1:chr18:+:68092910:68415203:D18Ertd653e::5-6-7>	AFE	E2,E3,E5	E4,E5	1.55317	3.77566	2.22249	0.000962471	0.00800505	0.550571	0.920573	0.370002
uc008goj.1,uc008gok.1,uc008gol.1,uc012bii.1:chr19:+:9063773:9151409:Ahnak:6:9>	ES	E6,E9	E6,E7,E9	1.22599	0.0715728	-1.15442	0.000961973	0.00800505	0.19194	0.386354	0.194414
uc008pvu.2,uc008pvv.2,uc008pvw.2,uc008pvx.2,uc008pvy.2,uc008pvz.2,uc008pwa.1,uc008pwb.2:chr3:+:88420128:88451974:Arhgef2,mKIAA0651:10.11:13	IR	E11,E13	E11,E12,E13	-0.135426	0.661344	0.79677	0.000962566	0.00800505	0.376601	0.205753	-0.170848
uc007til.1,uc007tim.1,uc007tin.1,uc007tio.1,uc007tip.1,uc007tiq.1,uc007tir.1,uc007tis.1,uc007tit.1,uc007tiu.1,uc007tiv.1,uc007tiw.1,uc007tix.1,uc007tiy.1,uc007tiz.1,uc007tja.1,uc007tjb.1,uc007tjc.1,uc007tjd.1,uc007tje.1,uc007tjf.1,uc011zjp.1:chr14:+:48268985:48356239:KNT,Ktn1:48:50>	IR	E48,E50	E48,E49,E50	-20	-0.84437	19.1556	0.000966145	0.00802611	1	0.21097	-0.78903
uc009rsy.2,uc009rsz.2,uc009rta.2,uc009rtb.2,uc009rtc.1,uc009rtd.1,uc009rte.1,uc009rtf.1:chr9:+:109834277:109986451:Map4,Mtap4:<1-2-3-5-6-7-8-9-12-13-14-15-16:19-20	ES	E16,E19	E16,E18	1.90076	-0.178484	-2.07925	0.000978366	0.00811885	0.134887	0.459541	0.324654
uc008fww.2,uc008fwy.2,uc008fwz.2,uc008fxa.2,uc008fxb.2,uc008fxc.2,uc012bfy.1:chr19:+:3767420:3818303:Suv420h1:<2:7-8	ES	E2,E7	E2,E5	-0.127699	1.45773	1.58543	0.000983587	0.00814817	0.474084	0.176152	-0.297933
uc009pil.1,uc009pim.1,uc009pin.1:chr9:-:48462401:48644327:Zbtb16::3-4-5-6-7-9>	AFE	E1,E3	E2,E3	-1.33737	0.142208	1.47958	0.000984023	0.00814817	0.801816	0.504278	-0.297538
uc008nnz.1,uc008noa.2,uc012chw.1:chr2:-:156668863:156688681:5430405H02Rik:<1:	ALE	E1,E2	E1,E3,E4	-2.31665	-0.456206	1.86044	0.000991926	0.00820477	0.218724	0.658337	0.439613
uc008vqd.1,uc008vqe.1:chr4:+:143002328:143010990:Pramef8:<1:3-4-5>	ES	E1,E3	E1,E2,E3	1.83909	0.194227	-1.64486	0.0010062	0.00831389	0.106597	0.396643	0.290046
uc009ggr.2,uc009ggs.2,uc009ggu.2,uc009ggv.2,uc009ggw.2,uc009ggx.2,uc009ggy.2,uc012fhy.1:chr7:-:31650422:31665361:Cd22:<1.2:4	IR	E2,E4	E2,E3,E4	0.55844	-1.10757	-1.66601	0.00101313	0.00836212	0.249061	0.618065	0.369005
uc007gbm.1,uc007gbn.1,uc007gbo.1,uc007gbp.1,uc007gbq.1,uc007gbr.1,uc007gbs.1:chr10:-:79519758:79565447:Sbno2,Sno:8-9-10-12-13-14-15-16-17-18-19-20-21-22:	ALE	E22,E23	E22,E24	-3.14196	-1.26821	1.87376	0.00101463	0.0083655	0.0409534	0.238169	0.197216
uc008upi.2,uc008upj.2,uc008upk.2,uc008upl.2,uc008upm.1,uc008upn.1,uc008upq.1,uc008upr.2,uc008upt.1:chr4:-:123026875:123361603:Macf1:<37-38:44-45-46-47-48-49-50-51-52-53-54	ES	E38,E44	E38,E39,E40,E41,E42,E43,E44	-0.927871	-2.29022	-1.36234	0.00102927	0.00845894	0.0968405	0.275388	0.178548
uc008vva.1,uc008vvb.2,uc008vvd.1,uc008vve.1,uc008vvf.1,uc008vvg.1,uc008vvh.1,uc008vvi.1:chr4:-:147986490:148001105:Tardbp:10:14.15	IR	E10,E14	E10,E11,E12,E13,E14	-20	-2.20327	17.7967	0.00102914	0.00845894	1	0.75372	-0.24628
uc007ghg.1,uc007ghh.1:chr10:+:80791475:80797917:Tbxa2r:<1:3-4>	ES	E1,E3	E1,E2,E3	1.20748	-0.433518	-1.641	0.00104478	0.00857723	0.150935	0.479842	0.328907
uc007usu.1,uc007usv.1:chr14:-:79734313:79790475:Naa16::15-16-17-18-19-20-21>	AFE	E1,E2,E3,E4,E5,E6,E7,E8,E9,E10,E11,E12,E13,E15	E14,E15	-0.741986	1.76451	2.5065	0.00105151	0.00862326	0.0255369	0.3567	0.331163
uc009fhs.2,uc009fht.1,uc012fah.1:chr7:+:16986544:17023045:Zc3h4:3-4-5-6-7-8-9-10-11-12-13:15>	ES	E13,E15	E13,E14,E15	-0.114025	0.871352	0.985378	0.00106654	0.00873718	0.361856	0.174781	-0.187076
uc007fgi.2,uc007fgj.2,uc007fgk.2,uc007fgl.1:chr10:+:61178010:61202008:Aifm2:<1-3-4-5-6-7-8-9-10:12>	IR	E10,E12	E10,E11,E12	-1.00086	-1.56494	-0.564081	0.00107351	0.00878491	0.262178	0.369869	0.107691
uc009pbr.2,uc009pbs.2,uc009pbt.2,uc012grq.1,uc012grr.1:chr9:+:43909852:43917270:C1qtnf5,Mfrp::21-22>	AFE	E16,E17,E18,E21	E20,E21	1.43894	0.117783	-1.32116	0.00107776	0.00881033	0.835012	0.608229	-0.226784
uc007oww.2,uc007owx.2,uc007owy.2,uc007owz.2,uc007oxa.1:chr12:+:105452753:105480144:Serpina3f,Serpina3g:<9:11	A3SS	E9,E10,E11	E9,E11	0.601025	2.25787	1.65685	0.00108554	0.00886446	0.522118	0.827603	0.305485
uc007iyl.2,uc007iym.2,uc007iyn.2,uc007iyo.2,uc007iyp.2,uc007iyq.2:chr11:-:54724288:54776442:Tnip1:<1:5-6-7-8-9-10-11-12-13.14-15-16.17-18-19-20-21	ES	E1,E5	E1,E4	-0.00845877	1.93467	1.94313	0.0010897	0.00888902	0.366933	0.107577	-0.259356
uc009uhs.2,uc009uht.2,uc009uhu.2,uc009uhv.1,uc009uhw.1,uc009uhx.1:chrX:+:132373572:132425620:Bhlhb9,Gprasp2:16:	ALE	E16,E17	E16,E18,E19,E20,E21	-1.1508	-20	-18.8492	0.00109719	0.00894062	0.396335	0	-0.396335
uc008ojq.1,uc008ojr.1,uc008ojs.1,uc008ojt.1,uc008oju.1,uc008ojv.1,uc008ojw.1,uc008ojx.1:chr2:-:180392668:180444704:Dido1:14-15-16-17-18-19-20-21-22:	ALE	E22,E23	E22,E24	1.2526	-0.220589	-1.47319	0.00109853	0.00894204	0.940821	0.783712	-0.157109
uc008dgj.2,uc008dgk.2,uc012awh.1:chr17:+:66132694:66191266:Ppp4r1:<1-2:4-5-6-7-8-9-10-11-12-13-14-15-16-17-18-19-20-21>	A3SS	E2,E4	E2,E3,E4	1.38839	0.411311	-0.97708	0.00110123	0.00894502	0.167608	0.352452	0.184844
uc009grt.2,uc009gru.1:chr7:+:52151448:52155994:Fuz::7	AFE	E1,E2,E3,E4,E5,E7	E6,E7	0.870943	2.14182	1.27088	0.00110108	0.00894502	0.558576	0.824302	0.265726
uc008hwo.1,uc008hwp.1,uc008hwq.1,uc008hwr.1,uc012bni.1:chr19:+:53384995:53450300:Mxi1::6-8-9-10-11>	AFE	E1,E6	E3,E6	-1.92134	-0.156805	1.76454	0.00110968	0.0090041	0.937915	0.639757	-0.298159
uc008wvt.1,uc008wvu.1,uc008wvv.1:chr5:+:30969274:30977199:Cenp-a,Cenpa:<1:5-6-7-8>	ES	E1,E5	E1,E3,E4,E5	0.0491003	-0.991956	-1.04106	0.00111801	0.00906213	0.383082	0.650059	0.266977
uc009sof.2,uc009sog.2,uc009soh.2:chrX:-:7731597:7753307:Tbc1d25:<2.3-4-5-6:8-9>	IR	E6,E8	E6,E7,E8	-0.552069	0.847298	1.39937	0.00111983	0.00906735	0.539892	0.226821	-0.31307
uc007sto.1,uc007stp.1,uc007str.1:chr14:+:27928084:28217090:Arhgef3::6	AFE	E3,E4,E6	E5,E6	-2.29762	-0.338566	1.95905	0.00112168	0.00907155	0.0403562	0.307625	0.267269
uc008wfh.1:chr4:+:155243675:155263212:Cpsf3l:<1-2-3-4-5-6-7-8-9-10-11:13-14-15-16-17>	ES	E11,E13	E11,E12,E13	-4.99568	-2.11828	2.8774	0.00112272	0.00907155	0.994486	0.844845	-0.149641
uc008ekv.1,uc008ekw.1,uc008ekx.1,uc008eky.1,uc008ekz.1:chr18:-:34758268:34784464:Brd8:<1-2-3-4-5-6-7-9:13	ES	E9,E11,E13	E9,E13	1.47635	2.70246	1.22611	0.00113676	0.00917539	0.711529	0.861084	0.149555
uc008clg.1,uc008clh.1:chr17:+:36974085:36996325:Trim26:<1:3	A3SS	E1,E3	E1,E2,E3	0.157698	-0.394994	-0.552692	0.00114126	0.00920198	0.427328	0.566597	0.139269
uc008cdv.1,uc008cdw.1,uc008cdx.1:chr17:+:34987335:34993317:Rdbp:2:4-5-6-7-8-9-10-11-12-13>	A5SS	E2,E4	E2,E3,E4	1.06946	-0.20549	-1.27495	0.00114838	0.0092497	0.179682	0.46864	0.288958
uc007gfb.1,uc007gfc.1,uc007gfd.1,uc007gfe.1,uc007gff.1:chr10:+:80318019:80331453:3110056O03Rik,Sppl2b:19:21>	IR	E19,E21	E19,E20,E21	-2.2082	-1.25295	0.955247	0.00116154	0.00934593	0.701678	0.477808	-0.22387
uc008huc.1,uc008hud.1:chr19:+:46781932:46815585:As3mt,Cyt19::3-4-5-6	AFE	E1,E3	E2,E3	1.28093	2.40394	1.123	0.00117126	0.00940435	0.245259	0.0934712	-0.151788
uc009kdf.1,uc009kdg.1,uc009kdh.1:chr7:-:140878012:140900978:Uros:<1.2:4-5-6-7-8-10-11-12-13>	A5SS	E2,E4	E2,E3,E4	0.000763927	1.33074	1.32997	0.00117103	0.00940435	0.426479	0.158986	-0.267493
uc007agb.1,uc007agc.1,uc007agd.1,uc011why.1:chr1:+:7079000:7163709:Pcmtd1:<1:3	ES	E1,E3	E1,E2,E3	-0.867712	-2.97207	-2.10435	0.00119055	0.00954202	0.515111	0.882	0.366889
uc007yjq.1,uc007yjr.1,uc007yjs.1:chr16:+:16983474:17047546:Mapk1:9:	ALE	E9,E10	E9,E11	-3.46854	-1.26836	2.20018	0.00119089	0.00954202	0.136697	0.619793	0.483096
uc008ulw.2,uc008ulx.2,uc008uly.2,uc008ulz.2:chr4:-:118972614:118993128:Ppih:<1-2-3-4-5-6-7-8-10:	ALE	E10,E11	E10,E13	-2.81849	-0.360266	2.45822	0.00119436	0.00955985	0.00704939	0.0762959	0.0692465
uc008cat.2,uc008cav.1,uc008caw.1:chr17:-:34162977:34168635:H2-Ke6,Slc39a7:12:14-16-17-18-19-20-21>	IR	E12,E14	E12,E13,E14	0.83664	1.77781	0.941168	0.00122054	0.00975927	0.202203	0.0972195	-0.104984
uc007nxm.1,uc007nxn.1,uc007nxo.1,uc007nxp.1,uc007nxq.1,uc007nxr.1,uc007nxs.1,uc007nxt.1,uc011ynv.1,uc011ynw.1,uc011ynx.1:chr12:+:76919304:77211915:Syne2,mKIAA1011:107-108-109-110-111-112-113:115-116-117-118-119-121-122	ES	E113,E115	E113,E114,E115	-0.158501	-0.959806	-0.801305	0.00122478	0.00978298	0.476926	0.670179	0.193253
uc007rie.2,uc007rif.1,uc007rih.2,uc007rii.2,uc007rij.2,uc007rik.2:chr13:+:83643032:83806684:Mef2c::5	AFE	E1,E2,E5	E3,E5	-1.79455	0.93805	2.7326	0.00122793	0.00979795	0.154119	0.571574	0.417455
uc008gmj.2,uc008gmk.2,uc008gml.1:chr19:+:8797976:8800932:AK036616,Snhg1:<2.3:5	IR	E3,E5	E3,E4,E5	3.13081	1.41006	-1.72075	0.00122946	0.00979996	0.0433803	0.101025	0.0576443
uc007det.1,uc007deu.1,uc007dev.1,uc007dew.1,uc007dex.1,uc011wun.1:chr1:+:162965296:162968668:Gas5:11:15-17-18-19-20>	ES	E11,E15	E11,E13,E15	-1.02774	-0.0103537	1.01739	0.00123277	0.00981611	0.699323	0.461959	-0.237364
uc009rpt.2,uc009rpu.2,uc009rpv.2,uc009rpw.2,uc009rpx.1,uc012har.1,uc012has.1:chr9:+:108393006:108404668:Usp19,mKIAA0891:14-15-16-17-18-19-20-21-22-23-24-25-26-27-28-29:	ALE	E29,E30	E29,E31	-0.737664	-2.37872	-1.64106	0.00125047	0.00993849	0.305421	0.064782	-0.240639
uc009mfr.2,uc009mfs.2,uc009mft.2,uc009mfu.2,uc009mfv.2:chr8:-:74864895:74945373:Eps15l1:25:28>	ES	E25,E28	E25,E27	-0.0175141	-0.877324	-0.85981	0.00125385	0.00995301	0.359501	0.555626	0.196125
uc007taz.1,uc007tba.1,uc007tbb.1,uc007tbc.1,uc007tbd.1,uc007tbe.1,uc007tbf.1:chr14:-:35339884:35401867:Ldb3:4-5-6-8-9:11-12	ES	E9,E10,E11	E9,E11	1.48117	0.605253	-0.875915	0.00126904	0.0100632	0.787725	0.626191	-0.161534
uc007hui.1,uc007huj.1,uc011xqt.1:chr11:+:4035162:4041195:Rnf215:<1-2-3-4-5.6-7:9-10-11>	IR	E7,E9	E7,E8,E9	0.179729	1.07246	0.892731	0.00127049	0.0100643	0.388812	0.212453	-0.176359
uc007fxv.2,uc007fxw.1,uc007fxx.1,uc007fxy.2,uc007fxz.1,uc007fya.2,uc011xhu.1:chr10:+:78037244:78047247:Ilvbl::3-4-5-6-7-8-9-10-11	AFE	E1,E3	E2,E3	-1.34377	-0.473934	0.869831	0.00127349	0.0100727	0.869731	0.757089	-0.112642
uc008nxi.1,uc008nxj.1,uc008nxk.1,uc008nxl.1,uc008nxm.1,uc008nxn.1:chr2:-:165113530:165151979:Elmo2:<1-3-4-5-6-7-8.9-10-12-14-15-16-17-18-19-20-21-22-23.24-25:	ALE	E25,E26	E25,E27	-0.968333	-2.31786	-1.34952	0.00127417	0.0100727	0.479828	0.192235	-0.287593
uc009iko.1,uc009ikp.1,uc009ikq.1,uc009ikr.1:chr7:-:105739115:105805079:2210018M11Rik:<1-2-3-4-5-6-7-8-9-10-11-12-13-14:18-19	ES	E14,E18	E14,E15	0.878788	-1.21177	-2.09055	0.00128488	0.0101364	0.133291	0.55911	0.425819
uc007hsc.2,uc007hsd.2,uc007hse.2,uc007hsf.2,uc007hsg.1,uc011xqo.1:chr11:+:3102355:3144591:Eif4enif1:6-7-8-9-11-12-13-14-15:18-19-20-21-22-23-24-25>	ES	E15,E18	E15,E17,E18	0.492198	-0.701072	-1.19327	0.00128932	0.010161	0.317335	0.62057	0.303235
uc008zwr.1,uc008zws.1,uc008zwt.1,uc008zwu.1:chr5:-:135131908:135164460:Limk1:4-5-6-7-8-10-11-12-13.14-15:	ALE	E15,E16	E15,E18,E19,E20,E21	-2.00485	-3.89712	-1.89228	0.00129771	0.0102167	0.360505	0.0517059	-0.308799
uc007rrf.2,uc007rrg.2,uc007rrh.1,uc007rri.1:chr13:+:101421297:101436368:Taf9:3:	ALE	E3,E5	E3,E6,E7,E8	0.866729	-0.193298	-1.06003	0.00131296	0.0103155	0.682946	0.456072	-0.226874
uc007joc.2,uc007jod.2,uc007joe.2,uc007jof.1:chr11:-:68634948:68685357:Ndel1::3-4-5-6-7-8-9	AFE	E1,E3	E2,E3	-4.2178	-1.11525	3.10255	0.00131609	0.0103199	0.993053	0.653978	-0.339076
uc009naa.2,uc009nab.2:chr8:-:106750590:106772458:Tk2:<1-2-3-4-5:7-8-9-10>	ES	E5,E7	E5,E6,E7	-0.348085	-1.28906	-0.940977	0.00131621	0.0103199	0.525995	0.746493	0.220498
uc007eou.1,uc007eov.2,uc007eow.2,uc007eox.2,uc011xbf.1,uc011xbg.1,uc011xbh.1:chr10:+:21601989:21719708:Sgk1::10-11-12-13-14-15-16-17-18-19-20>	AFE	E8,E10	E9,E10	-0.38776	-2.32924	-1.94148	0.00132052	0.0103432	0.747851	0.950929	0.203078
uc009put.1,uc009puu.1,uc009puv.1:chr9:-:57233762:57287921:Ppcdc:<1-2-3-4-5:7-8>	A3SS	E5,E7	E5,E6,E7	-2.15675	-1.05907	1.09768	0.00132671	0.0103811	0.845486	0.594862	-0.250624
uc009bvi.1,uc009bvj.1,uc009bvk.1,uc009bvl.1,uc012elh.1:chr6:+:48634576:48642061:Gimap4:<1-2-3:9.10	IR	E3,E9	E7,E8,E9	-1.34056	-3.21523	-1.87467	0.00134103	0.0104824	0.478224	0.925634	0.44741
uc007ohg.1,uc007ohh.2,uc007ohj.2,uc007ohk.2,uc007ohl.2,uc007ohm.1,uc011yph.1,uc011ypi.1:chr12:+:87165622:87402843:Ttll5,mKIAA0998:36-37-39:41>	ES	E39,E41	E39,E40,E41	0.218183	-1.13302	-1.3512	0.00134349	0.0104909	0.363002	0.64958	0.286578
uc007cnp.1,uc007cnq.1,uc007cnr.1:chr1:+:133585271:133612016:5430435G22Rik,Rab42,Rab7b::6.7.8>	AFE	E1,E2,E3,E4,E6	E5,E6	0.517301	1.494	0.976702	0.00134531	0.0104945	0.259676	0.546904	0.287228
uc007kqg.1,uc007kqj.1,uc007kqk.1,uc007kql.1:chr11:+:83943173:84215153:Acaca:4-5-6-7-8-9-10-11-13-14-15-16-17-18-19-20-21-22-23-24-25-26-27-28-29-30-31:33-34-35-36-37-38-39-40-41-42-43-44-45-46-47-48-49-50-51-52-53-54-55-56-57-58>	ES	E31,E33	E31,E32,E33	-0.935288	-0.0542909	0.880997	0.0013482	0.0105064	0.707603	0.467658	-0.239944
uc007vcv.1,uc007vcw.1,uc007vcx.1:chr15:+:5135524:5168332:Ttc33::4	AFE	E1,E2,E4	E3,E4	-0.431307	-1.47731	-1.046	0.00135028	0.0105119	0.711536	0.454719	-0.256818
uc007xgs.2,uc007xgt.2,uc007xgu.2,uc007xgv.2:chr15:-:89256779:89260358:Chkb:<1.2:4-5	IR	E2,E4	E2,E3,E4	0.654885	-0.684069	-1.33895	0.00135633	0.010527	0.19666	0.473852	0.277192
uc008fxr.2,uc008fxs.2,uc008fxt.1,uc012bfz.1:chr19:+:3935185:3949340:Unc93b1:5-6-7.8:10-11-12-13-14>	IR	E8,E10	E8,E9,E10	-0.627063	0.0259479	0.653011	0.00135526	0.010527	0.475941	0.317391	-0.158549
uc009rjt.2,uc009rju.1,uc012gzv.1:chr9:+:106356187:106366342:Pcbp4:<1-2-3-4-5-6.7-8-9-10-11-12-13:15.16>	A3SS	E13,E15	E13,E14,E15	-2.21139	-3.50624	-1.29485	0.00135457	0.010527	0.83771	0.949521	0.111811
uc008plq.1,uc008plr.2,uc008pls.2,uc008plt.2,uc012cqg.1,uc012cqh.1,uc012cqi.1:chr3:+:67696141:68430404:Iqcj,Iqcj-schip1,Schip1::11-12-13-14-15-16>	AFE	E10,E11	E8,E9,E11	-0.690107	-2.74637	-2.05626	0.0013583	0.0105316	0.420206	0.884624	0.464417
uc009cnn.2,uc009cno.2,uc009cnp.2:chr6:-:83430207:83456963:Dguok:8:10>	IR	E8,E10	E8,E9,E10	0.551526	1.6731	1.12158	0.00136918	0.0106053	0.179268	0.0621085	-0.11716
uc007yhh.1,uc007yhi.1:chr16:-:14299336:14317425:0610037P05Rik:<1:3	ES	E1,E3	E1,E2,E3	-0.299445	-2.77791	-2.47847	0.00138357	0.0106939	0.507741	0.94302	0.435278
uc008gkk.2,uc008gkl.2,uc008gkm.2,uc012bhu.1:chr19:-:7300157:7315712:AK209302,Naa40:<1-2-3-4:7.8	IR	E4,E7	E4,E5,E6,E7	0.271923	1.0354	0.763475	0.00138481	0.0106939	0.387577	0.203508	-0.184069
uc009thc.2,uc009thd.2,uc009the.1,uc009thf.1,uc012hhy.1:chrX:-:54484661:54591906:Arhgef6::5-6-7-8-10-11-12-14-15-16-17-18-19	AFE	E1,E2,E5	E4,E5	0.96697	-0.347833	-1.3148	0.00139146	0.0107345	0.712285	0.376973	-0.335312
uc007hju.1,uc007hjv.1:chr10:-:126954194:126959491:Shmt2:<1:3-4-5-6-7-8-9-10-11-12-13>	A3SS	E1,E3	E1,E2,E3	-1.84519	-2.84433	-0.999136	0.00140173	0.010792	0.86003	0.93561	0.0755803
uc008xjs.1,uc008xjt.1:chr5:+:48763568:48779995:Pacrgl:<2-4-5-6:8-9-10-11>	ES	E6,E8	E6,E7,E8	-0.720546	-2.26868	-1.54814	0.00140131	0.010792	0.592967	0.847938	0.254971
uc008emn.1,uc008emo.2,uc008emp.2:chr18:-:35816342:35821840:Spata24:<1-3-4-5:	ALE	E5,E6	E5,E7	2.67415	0.367725	-2.30642	0.00141381	0.0108463	0.825577	0.531679	-0.293899
uc009puh.1,uc009pui.1,uc009puj.1,uc009puk.1:chr9:-:56991062:56996019:Neil1:3:5	IR	E3,E5	E3,E4,E5	-2.25815	-3.20479	-0.946646	0.00141201	0.0108463	0.847905	0.929969	0.0820641
uc009utk.1,uc009utl.2,uc009utm.2,uc009utn.2,uc012hrg.1:chrX:+:156940097:157036810:Phka2:3-4-5-6:	ALE	E6,E7	E6,E8,E9,E10,E11,E12,E13,E14,E15,E16,E17,E18,E20,E21,E22,E23,E24,E25,E26,E27,E28,E29,E30,E31,E32,E33,E34,E35,E36,E37	-0.945322	-2.19546	-1.25013	0.00141442	0.0108463	0.656149	0.312926	-0.343223
uc007mcg.1,uc007mch.1,uc007mci.1,uc007mcj.1,uc007mck.1:chr11:+:109287259:109314127:AK085963,Amz2::3-4-5-6-7-9-10-11>	AFE	E1,E3	E2,E3	1.50933	3.11602	1.60669	0.00141804	0.0108524	0.068869	0.0130232	-0.0558459
uc009pic.2,uc009pid.2,uc009pie.2,uc009pif.2,uc009pig.2,uc009pih.2:chr9:-:48296801:48303435:Rbm7:5:8.9>	A5SS	E5,E8	E6,E8	2.01132	1.33231	-0.679016	0.00141775	0.0108524	0.0786143	0.211307	0.132693
uc009avx.1,uc009avy.1,uc009avz.1,uc009awa.1,uc009awb.1,uc009awc.1:chr6:+:4852973:5115661:Neurabin,Ppp1r9a:<10-11-13-14-15-17.18-19-20-21-23:25-26>	ES	E23,E25	E23,E24,E25	0.927987	-0.587787	-1.51577	0.00142084	0.010863	0.28564	0.64256	0.35692
uc007huq.1,uc011xqv.1:chr11:+:4086835:4115508:Tbc1d10a:<1-2-3-4:6-7-8-9-10>	IR	E4,E6	E4,E5,E6	0.248395	-0.656815	-0.90521	0.00142677	0.0108974	0.193901	0.365161	0.17126
uc007gae.1,uc007gaf.1,uc007gag.1,uc011xid.1:chr10:-:79323219:79337379:BC005764:<1.2:4-5-6-8-9-10-11.12>	IR	E2,E4	E2,E3,E4	-0.293547	-1.72277	-1.42922	0.00143327	0.0109253	0.450284	0.798745	0.348461
uc007hoq.2,uc007hor.2,uc007hos.2,uc011xqk.1:chr10:+:128258826:128314694:1110005A23Rik,Sarnp:<1:3	ES	E1,E3	E1,E2,E3	2.90256	1.01214	-1.89042	0.00143306	0.0109253	0.0167546	0.102869	0.0861142
uc008idp.1,uc008idq.1,uc008idr.1,uc012boq.1:chr2:+:3201559:3243641:Nmt2:4:9-10-11-12-13-14-15-16-17-18>	ES	E4,E9	E4,E6,E7,E9	1.0997	0.00363106	-1.09607	0.00143853	0.0109545	0.247409	0.431343	0.183935
uc008emg.2,uc008emh.2:chr18:+:35721811:35751699:Matr3:<1.2:5-6-7-8-9-10-11-12-13-14-15-16-17>	ES	E2,E5	E2,E4,E5	-0.501342	-2.3632	-1.86186	0.00144252	0.010974	0.330157	0.730781	0.400624
uc008ign.1,uc008igo.1,uc008igp.1,uc008igq.2,uc008igr.2,uc008igs.2,uc008igt.2,uc008igu.2,uc008igv.2,uc008igw.1,uc008igx.1,uc008igy.1,uc012bpa.1:chr2:-:6460743:7317825:Celf2,Napor-1:24:27>	IR	E24,E27	E24,E25,E26,E27	-0.450604	0.554049	1.00465	0.001449	0.0110124	0.193451	0.0776308	-0.11582
uc007oet.1,uc007oeu.1,uc007oev.1,uc007oew.1,uc007oex.1,uc007oey.1,uc011yow.1:chr12:+:85658067:85684674:Apa1,Zfp410:<2:7.8-10-12-13-15-18-19-20-21>	ES	E2,E7	E2,E5,E6,E7	-1.28918	-4.19523	-2.90605	0.00146301	0.0111079	0.675089	0.984904	0.309814
uc007hjk.2,uc007hjl.2,uc007hjm.2,uc007hjn.2,uc007hjo.2,uc007hjp.2,uc007hjq.2:chr10:+:126817965:126936440:R3hdm2:15:17-18	ES	E15,E17	E15,E16,E17	2.91437	1.60226	-1.31212	0.001483	0.0112485	0.0369562	0.143665	0.106708
uc007dhy.2,uc011wuv.1,uc011wuw.1:chr1:+:165992206:166010916:Sell:<1-2-3-4-5-6-7:9-10>	ES	E7,E9	E7,E8,E9	0.664911	2.13776	1.47285	0.00151587	0.0114751	0.289036	0.0572875	-0.231748
uc009emz.1,uc009ena.1,uc009enb.1,uc009enc.1,uc009end.1,uc009ene.1:chr6:-:137425765:137597641:Eps8::5.6-7-8-9-10-11-12-14-15-16-17-18-19-20-21-22-23-24-25-26>	AFE	E3,E5	E4,E5	-20	-0.826679	19.1733	0.00152684	0.0115468	1	0.396273	-0.603727
uc009usj.1,uc009usk.1:chrX:+:155648238:155801417:Rps6ka3:<3:6-7-8-9-10-11-12-13-14-15-16-17-18-19-20-21-22-23-24-25-26>	ES	E3,E6	E3,E4,E5,E6	-1.08579	0.850236	1.93602	0.00153686	0.0116111	0.613014	0.251308	-0.361706
uc009gqw.2,uc009gqx.2,uc009gqy.2,uc009gqz.2,uc009gra.1,uc009grb.1:chr7:+:52071739:52096179:Il4i1,Nup62,Nup62-il4i1,U89428:12:15-16-17>	IR	E12,E15	E12,E13,E14,E15	-1.02496	-2.10174	-1.07678	0.00154	0.0116234	0.388459	0.642711	0.254252
uc007zme.1,uc007zmf.1,uc007zmg.1,uc007zmh.1,uc007zmi.1,uc007zmj.1,uc007zmk.1,uc007zml.1:chr16:+:56048450:56190124:Senp7,mKIAA1707:<5.6:	ALE	E6,E7	E6,E8	-0.955578	0.688597	1.64417	0.00154995	0.011687	0.0222354	0.10705	0.0848148
uc009mdw.1,uc009mdx.1,uc009mdy.1,uc009mdz.1,uc009mea.1:chr8:+:74092825:74110607:Slc27a1:<1:4	ES	E1,E4	E1,E2,E4	-0.102168	-0.619188	-0.51702	0.00156652	0.0118004	0.435714	0.540857	0.105143
uc007arj.1,uc007ark.1,uc007arl.2,uc007arn.1,uc011wjq.1,uc011wjr.1:chr1:+:37356737:37467580:AK051424,Inpp4a:<8-9-10-11-13-14-15-18-19-20-21-22-23-24-25-26-27-28:	ALE	E28,E29	E28,E31	-0.401079	-2.10262	-1.70154	0.0015702	0.0118165	0.728732	0.260874	-0.467858
uc009snu.2,uc009snv.2,uc009snw.2:chrX:-:7700426:7709984:Wdr13:<1:4-5-6-7-8-9-10-11>	A3SS	E1,E4	E1,E3	-1.6047	-3.24676	-1.64206	0.001576	0.0118486	0.816176	0.960214	0.144037
uc008qll.1,uc008qlm.1:chr3:-:95682427:95686151:Gm129:<1.2:4-5-6-7-8>	IR	E2,E4	E2,E3,E4	-0.983114	0.471678	1.45479	0.00157772	0.0118499	0.472595	0.172367	-0.300228
uc009niy.2,uc009niz.2,uc009nja.1:chr8:-:112195220:112217194:2400003C14Rik:9:11	IR	E9,E10,E11	E9,E11	2.9595	1.38058	-1.57892	0.0015983	0.0119927	0.82114	0.458074	-0.363066
uc009ndp.1,uc009ndq.1,uc009ndr.1,uc009nds.1,uc009ndt.1,uc012gjn.1:chr8:-:108219759:108224995:Acd:11:13-14-15-16.17>	IR	E11,E13	E11,E12,E13	1.24461	2.51127	1.26666	0.00160387	0.0120228	0.147985	0.0387286	-0.109257
uc008gmj.2,uc008gmk.2,uc008gml.1:chr19:+:8797976:8800932:AK036616,Snhg1:7:9	IR	E7,E9	E7,E8,E9	2.47963	1.20455	-1.27508	0.00162853	0.0121957	0.0380815	0.0981003	0.0600188
uc009duc.1,uc009dud.1,uc009due.1:chr6:-:125182639:125187045:Cd27:<1-2:	ALE	E2,E3	E2,E4,E5,E6,E7	-1.28845	-2.55626	-1.2678	0.0016341	0.0122255	0.457136	0.199383	-0.257753
uc008hzr.2,uc008hzs.2,uc008hzt.2,uc008hzu.2,uc008hzv.1,uc008hzw.1,uc008hzz.1,uc009vbz.1,uc012bnw.1:chr19:-:57107753:57389409:Ablim1:11-12-15-16-17-18-22:24	A3SS	E22,E24	E22,E23,E24	1.38547	0.657319	-0.728147	0.00164497	0.0122948	0.193495	0.331478	0.137984
uc007nin.2,uc007nio.2,uc007nip.2,uc007niq.2,uc007nir.1,uc007nis.2:chr12:+:33832550:34057222:Atxn7l1:<1:3	ES	E1,E3	E1,E2,E3	-0.860018	-1.81374	-0.953725	0.00164753	0.0122949	0.647395	0.839006	0.191611
uc008cgp.2,uc008cgq.2:chr17:+:35331451:35333250:Ltb:<1-2:	ALE	E2,E3	E2,E4	-2.41433	-1.07164	1.34269	0.00164818	0.0122949	0.126527	0.371022	0.244494
uc007lau.1,uc007lav.1:chr11:+:95703608:95707045:Gngt2::3	AFE	E1,E3	E2,E3	2.79567	1.62435	-1.17132	0.00165064	0.0122982	0.0627264	0.155298	0.0925716
uc007swy.1,uc007swz.1,uc007sxa.1,uc007sxb.1,uc007sxc.1,uc011zif.1:chr14:-:31984113:32020012:Nisch,mKIAA0975:15-16:	ALE	E16,E17	E16,E18,E19,E20,E21	-1.36943	-2.44613	-1.0767	0.00165184	0.0122982	0.298472	0.132899	-0.165573
uc008dzi.1,uc008dzj.1,uc008dzl.1:chr18:-:6435948:6516085:Epc1::4-5-6-7-8-9-10-11-12-13-14-15-16>	AFE	E1,E4	E2,E4	-2.15488	-0.575634	1.57924	0.00165436	0.0123051	0.835412	0.507823	-0.327589
uc008hox.1,uc008hoy.1:chr19:-:43922456:43986882:Dnmbp::5-6-8-9-10-11-12-13-14-15-16-17-18>	AFE	E1,E2,E3,E5	E4,E5	1.32358	3.43734	2.11376	0.00165841	0.0123233	0.21487	0.766608	0.551738
uc007mst.1,uc011yjb.1:chr11:-:120317917:120319377:1810049H13Rik:<1.2:4>	A5SS	E2,E4	E2,E3,E4	-1.19337	-2.45021	-1.25685	0.00166425	0.0123527	0.755856	0.92198	0.166124
uc008bes.1,uc008bet.1,uc008beu.1,uc008bev.1,uc008bew.1,uc012ant.1:chr17:+:27070071:27074835:Phf1,Tctex-3:<2:	ALE	E2,E3	E2,E4	-2.70877	-0.995253	1.71352	0.00166779	0.0123527	0.0174297	0.113217	0.0957876
uc008iuj.1,uc008iuk.1,uc008iul.1:chr2:-:26064649:26092940:Qsox2:<1-2-3-5-6-7-8-9-10-11-12-13:	ALE	E13,E14	E13,E15	0.794256	-0.228458	-1.02271	0.00167906	0.0124051	0.549522	0.302454	-0.247068
uc008uxt.1,uc008uxu.1,uc008uxv.1,uc008uxw.1:chr4:-:129296517:129301152:AK031278,Ccdc28b:4:6	IR	E4,E6	E4,E5,E6	1.25445	2.26276	1.00831	0.00167912	0.0124051	0.151857	0.0473875	-0.104469
uc007hxq.2,uc007hxr.2,uc007hxs.2,uc007hxt.2,uc007hxu.1,uc007hxw.1:chr11:-:5869668:5965751:Camk2b::25-26-27-28>	AFE	E21,E25	E24,E25	0.693147	-1.30833	-2.00148	0.00169664	0.0125225	0.1714	0.59264	0.42124
uc008ovt.1,uc008ovu.1,uc008ovv.1,uc012coi.1:chr3:+:30993982:31021499:Skil:<1:4.5.6-8-9	A3SS	E1,E4	E1,E2,E3,E4	-0.0583445	-2.46425	-2.4059	0.00170062	0.0125278	0.325175	0.726363	0.401188
uc009lxj.1,uc009lxk.1,uc009lxl.1,uc009lxm.1,uc009lxn.1,uc012gen.1:chr8:-:72229036:72240847:Zfp869:<4:7-8-9-10>	ES	E4,E7	E4,E5	0.374693	-0.77319	-1.14788	0.00169903	0.0125278	0.326089	0.602829	0.27674
uc009ntl.2,uc009ntm.2,uc009ntn.2:chr8:-:125149035:125223009:Cbfa2t3::3	AFE	E1,E3	E2,E3	0.724014	-1.34574	-2.06975	0.00170664	0.0125601	0.321555	0.732065	0.41051
uc009nku.1,uc009nkv.1,uc009nkw.1,uc012gkn.1:chr8:+:113142537:113244299:Vac14::23-24>	AFE	E1,E2,E3,E4,E5,E6,E7,E8,E9,E10,E11,E12,E13,E14,E15,E16,E17,E20,E21,E23	E22,E23	1.92512	3.36707	1.44195	0.001713	0.0125889	0.882326	0.979837	0.0975107
uc009pij.1,uc009pik.1:chr9:-:48399981:48413182:Nnmt:<1-2-3:5>	IR	E3,E5	E3,E4,E5	-2.54625	-1.51593	1.03032	0.00171383	0.0125889	0.9046	0.759612	-0.144988
uc008imk.1,uc008imm.1,uc008imn.1,uc008imo.1,uc008imp.1,uc008imq.1,uc008imr.1,uc008ims.1,uc008imt.1,uc008imu.1,uc008imv.1,uc008imw.1,uc012brk.1:chr2:+:19831406:20732162:AK018352,Etl4,Skt,mKIAA1217:30:35-36>	ES	E30,E35	E30,E32,E33,E35	0.291658	-0.964497	-1.25616	0.00172284	0.012643	0.116889	0.256002	0.139113
uc009bvm.1,uc009bvn.1:chr6:-:48651581:48658243:Gimap6:<1-2:4>	IR	E2,E4	E2,E3,E4	0.383686	1.26732	0.883632	0.00173037	0.0126808	0.0922749	0.0297167	-0.0625582
uc009btt.1,uc009btu.1:chr6:-:47974186:47998910:Zfp777::3-4-5-6-7>	AFE	E1,E3	E2,E3	0.577315	-0.788457	-1.36577	0.00174129	0.0127418	0.477538	0.835876	0.358338
uc007jsj.1,uc007jsk.1,uc007jsl.1,uc007jsm.1,uc011xxd.1,uc011xxe.1:chr11:-:69710859:69714488:2810408A11Rik::3.4-5-6.7-9-10>	AFE	E1,E3	E2,E3	20	0.628609	-19.3714	0.00174509	0.0127575	0	0.814212	0.814212
uc009drb.1,uc009drc.1:chr6:-:124480361:124492377:C1s:<1.2:4-5-6-7-8-9-10-11-12-13-14>	A5SS	E2,E4	E2,E3,E4	1.7315	0.542791	-1.18871	0.00174803	0.0127667	0.0712579	0.318313	0.247055
uc009kwd.1,uc009kwe.1,uc012fzo.1,uc012fzp.1:chr8:-:12614276:12672100:Tubgcp3,mKIAA0357:12-13-14-15:17-18-19-20-21-22-23-24>	IR	E15,E17	E15,E16,E17	-1.07129	0.41894	1.49023	0.00175484	0.0128043	0.280963	0.0752146	-0.205749
uc009kll.2,uc012fxg.1,uc012fxh.1:chr7:+:148653260:148657380:Cd151:<1:3-5-6-7-8-9-10>	A5SS	E1,E3	E1,E2,E3	0.0857585	1.00957	0.923809	0.00176851	0.0128918	0.374535	0.20548	-0.169054
uc007haa.2,uc007hab.2,uc007hac.2,uc007had.2,uc007hae.2:chr10:+:110910247:110935206:Nap1l1:17-18:20.21>	IR	E18,E20	E18,E19,E20	-0.435182	-1.84171	-1.40652	0.00178167	0.0129754	0.339266	0.681624	0.342358
uc008bdc.2,uc008bdd.2,uc008bde.2,uc008bdf.1:chr17:-:26125980:26206122:Rab11fip3:<1-2-3-5-6:8-9-11-12-13-14-15-16-17>	ES	E6,E8	E6,E7,E8	0.245106	-0.805976	-1.05108	0.00178522	0.012989	0.343951	0.586505	0.242553
uc009gex.1,uc009gey.1:chr7:-:31340459:31344665:Lin37:<1:3-4-5-6-7-8-9-10>	A3SS	E1,E3	E1,E2,E3	1.9167	0.84454	-1.07216	0.00178877	0.0130024	0.0796079	0.199385	0.119777
uc008eya.1:chr18:+:54021766:54115338:Csnk1g3:<1-2-3-4-5-6-7-8-9-10-11:13>	ES	E11,E13	E11,E12,E13	1.22451	-0.342399	-1.56691	0.00179914	0.0130655	0.279652	0.574762	0.29511
uc008pfh.2,uc008pfi.2,uc008pfj.2:chr3:+:54165028:54194963:Postn:<1-2-3-4-5-6-7-8-9-10-11-12-13-14-15-16:18-19	ES	E16,E18	E16,E17,E18	1.24611	2.33677	1.09065	0.00180437	0.0130911	0.186374	0.062145	-0.124229
uc008vva.1,uc008vvb.2,uc008vvd.1,uc008vve.1,uc008vvf.1,uc008vvg.1,uc008vvh.1,uc008vvi.1:chr4:-:147986490:148001105:Tardbp:14.15:17>	IR	E15,E17	E15,E16,E17	-3.90257	-1.76358	2.13899	0.00181044	0.0131227	0.977246	0.590371	-0.386875
uc007rjr.1:chr13:-:91074953:91363592:Atg10:<1-2-3:6-7-8>	ES	E3,E6	E3,E5	-20	0.579819	20.5798	0.00182778	0.0132359	1	0.260137	-0.739863
uc007kem.1,uc007ken.1,uc007keo.1,uc007kep.1:chr11:+:75465010:75488136:Myo1c::4-5-6-7-8-9-10-11-12-13-14-15-16-17-18-19-20-21-22-23-25-26-27-28-29-30-31-32-33-34-35>	AFE	E1,E4	E3,E4	0.183415	-0.693028	-0.876442	0.00184046	0.0133151	0.407477	0.634249	0.226771
uc007dhv.1,uc007dhw.1:chr1:+:165925045:165927374:2810422O20Rik:<1.2:4>	A5SS	E2,E4	E2,E3,E4	-1.59033	0.565648	2.15598	0.00184816	0.0133582	0.837238	0.287353	-0.549884
uc007avx.2,uc007avy.2,uc007avz.2,uc007awa.2:chr1:-:44143461:44159233:1700029F09Rik:<1.2:6.7-8-9-10-11>	ES	E2,E6	E2,E4,E6	-0.825238	1.27108	2.09632	0.00185915	0.0134251	0.767529	0.174949	-0.59258
uc008nlh.2,uc008nli.2:chr2:+:155576952:155581214:Procr:<1-2-3:5>	IR	E3,E5	E3,E4,E5	0.950192	1.57469	0.624503	0.00186448	0.0134509	0.154909	0.0933897	-0.0615194
uc009fhs.2,uc009fht.1,uc012fah.1:chr7:+:16986544:17023045:Zc3h4::3-4-5-6-7-8-9-10-11-12-13	AFE	E1,E3	E2,E3	3.35574	1.67964	-1.67609	0.0018774	0.0135187	0.0425831	0.256335	0.213752
uc009mim.1,uc009min.2:chr8:-:81790322:81818855:Mmaa:<2:4	ES	E2,E4	E2,E3	0.722208	-1.21694	-1.93914	0.00187712	0.0135187	0.199014	0.640429	0.441415
uc007juy.1,uc007juz.1,uc007jva.1:chr11:+:70273123:70279701:Zmynd15:<7-8-9-10-11:13-14-15-16	ES	E11,E13	E11,E12,E13	-1.43573	-2.73818	-1.30245	0.00188021	0.0135263	0.750859	0.914256	0.163397
uc008gka.2,uc012bhr.1,uc012bhs.1:chr19:+:7070620:7073775:Trpt1:<1-2:4-5-6-7>	ES	E2,E4	E2,E3,E4	-1.20174	-0.36043	0.84131	0.00188302	0.0135337	0.667751	0.461548	-0.206203
uc007hte.2,uc007htf.2,uc007htg.2,uc007hth.2,uc007hti.2,uc011xqq.1:chr11:-:3417524:3439295:Smtn::16-17	AFE	E1,E4,E5,E6,E7,E8,E10,E11,E12,E13,E14,E16	E15,E16	4.07912	2.23057	-1.84854	0.00188715	0.0135508	0.964211	0.755913	-0.208297
uc009lxr.2,uc012gep.1:chr8:+:72315061:72331647:Atp13a1:<1-2-3-4-5-6:8-10	IR	E6,E8	E6,E7,E8	1.38193	2.21516	0.833229	0.00190666	0.0136653	0.157133	0.0754545	-0.0816783
uc007vlf.2,uc007vlg.1,uc007vlh.1:chr15:+:34012473:34072140:Mtdh:11-12-13:15>	ES	E13,E15	E13,E14,E15	-20	-2.37248	17.6275	0.00192054	0.0137519	1	0.91807	-0.0819298
uc007eep.2,uc007eeq.2:chr1:+:196765014:196787486:Cd34:<1-2-3-4-5-6-7:9>	A3SS	E7,E9	E7,E8,E9	0.945497	0.0331858	-0.912311	0.00193108	0.0138145	0.189987	0.352459	0.162473
uc009myi.2,uc009myj.2,uc012gir.1:chr8:-:97944149:97958769:Gtl3:3-4:6	IR	E4,E6	E4,E5,E6	0.678689	1.73977	1.06108	0.0019337	0.0138204	0.103963	0.0388636	-0.0650996
uc009cpr.2,uc009cps.2,uc009cpt.1,uc012eof.1:chr6:-:85396778:85401964:1700040I03Rik::3-4	AFE	E1,E3	E2,E3	-0.900246	0.319315	1.21956	0.00193801	0.0138383	0.729727	0.451035	-0.278692
uc007pwa.1,uc007pwb.1,uc007pwc.1,uc007pwd.1,uc007pwe.1,uc011yxo.1:chr13:+:24706478:24825675:Fam65b:4-5-6-7-8-9-10-11-12-13-14-17:	ALE	E17,E19	E17,E20,E21,E22,E23,E24,E25,E26,E27,E28	-2.27505	-1.27968	0.995367	0.00194105	0.0138472	0.220747	0.418982	0.198236
uc008kgc.2,uc008kgd.2,uc008kge.2,uc008kgf.1,uc008kgg.1,uc008kgh.1,uc008kgi.2,uc008kgj.2,uc012bxw.1:chr2:-:77733709:77784410:AK039942,Cwc22:<1:3	ES	E1,E3	E1,E2,E3	0.932121	-0.274427	-1.20655	0.00198601	0.0141547	0.27708	0.520009	0.242929
uc009dnj.2,uc012erz.1:chr6:+:120413214:120433745:Il17ra:<1-2-3-4-5-6-7-8-9:11	IR	E9,E10,E11	E9,E11	-0.606631	-1.45687	-0.850241	0.00199272	0.0141893	0.128579	0.0476224	-0.0809566
uc008vye.1,uc008vyf.1,uc008vyg.1,uc008vyh.1,uc008vyi.1,uc012dpx.1,uc012dpy.1:chr4:-:150377763:150418731:Per3:<1-2-3:5-6-7-8-9-10	ES	E3,E5	E3,E4,E5	2.71615	1.105	-1.61115	0.00202777	0.0144122	0.0473625	0.223172	0.175809
uc008ftr.1,uc008fts.1,uc008ftu.1,uc008ftv.1,uc008ftw.1,uc008ftx.1,uc008fty.1,uc008ftz.1:chr18:+:82644514:82755029:Mbp:7-8-9:11>	ES	E9,E10,E11	E9,E11	-0.352599	-1.04211	-0.689514	0.00203406	0.0144435	0.318969	0.195832	-0.123137
uc007iaj.1,uc007iak.1,uc007ial.1,uc007iam.1,uc007ian.1,uc007iao.1,uc007iap.1,uc007iaq.1,uc011xrn.1:chr11:+:11586215:11672929:Ikzf1:6:9.10-13>	ES	E6,E9	E7,E9	-2.07601	-3.98471	-1.9087	0.00205406	0.0145721	0.855214	0.965754	0.11054
uc007vns.1,uc007vnt.1,uc007vnu.1:chr15:-:38417184:38449021:Azin1:4-5-6:8-9-10-11	A3SS	E6,E8	E6,E7,E8	0.409866	2.70476	2.29489	0.00207015	0.0146713	0.294814	0.0270457	-0.267768
uc007zld.1,uc007zle.1,uc007zlf.1,uc007zlg.1,uc007zlh.1:chr16:+:52031661:52208159:Cblb:5-6-8-9-10-11-12-13-14-15-16-17-18-19:21-22-23>	ES	E19,E21	E19,E20,E21	-1.38953	0.120652	1.51018	0.00207471	0.0146778	0.667076	0.348306	-0.31877
uc008erj.1,uc008erk.1:chr18:-:38004478:38095065:Diap1:<1:3-4-5-6-7-8-9-10-11-12-13-14-15-16-17-18-19-20-21-22-23-24-25-26-27>	ES	E1,E3	E1,E2,E3	0.519435	-1.75109	-2.27052	0.00207936	0.0146896	0.357224	0.794408	0.437184
uc009fxz.1,uc009fya.1,uc009fyb.1:chr7:+:28964501:28972313:Dyrk1b::3-4-5-6-7-8-9	AFE	E1,E3	E2,E3	1.95334	0.0948672	-1.85847	0.00208019	0.0146896	0.121967	0.411329	0.289362
uc008hgv.1,uc008hgw.2:chr19:-:34885383:34953945:Pank1::3-4-5-6-7-8>	AFE	E1,E3	E2,E3	2.41733	0.643645	-1.77368	0.00208851	0.0147347	0.241085	0.676141	0.435057
uc007muw.1,uc007mux.1,uc007muy.1:chr11:+:120809797:120820314:Slc16a3:<2:4-5-6-7>	ES	E2,E4	E2,E3,E4	-1.25804	-2.28708	-1.02904	0.00209491	0.0147664	0.741354	0.876806	0.135451
uc009gpr.2,uc009gps.2,uc009gpt.2,uc009gpu.2:chr7:+:51751957:51756504:Fam71e1,GARI-L5:<1.2:4	IR	E2,E4	E2,E3,E4	0.588834	-0.526093	-1.11493	0.00210259	0.0148069	0.2399	0.621884	0.381985
uc008erv.1,uc008erw.1,uc012bce.1:chr18:-:38398058:38410219:1700086O06Rik:4:6>	ES	E4,E6	E4,E5,E6	0.965081	-0.510826	-1.47591	0.00211086	0.0148378	0.208428	0.484357	0.275928
uc009rlv.1,uc009rlw.1,uc009rlx.1,uc009rly.1,uc009rlz.1,uc009rma.1,uc009rmb.1,uc012hai.1:chr9:+:107479282:107486379:Hyal1,Nat6:6:	ALE	E6,E7	E6,E8,E9,E10	-1.23252	-0.436435	0.796085	0.00211085	0.0148378	0.319506	0.507719	0.188213
uc007ijc.1,uc007ijf.1,uc007ijg.1,uc007ijh.1,uc007iji.1:chr11:-:32125627:32167658:Mare,Nprl3:<1.2.3-4:6	ES	E4,E6	E4,E5,E6	1.37212	-0.193175	-1.56529	0.00212812	0.0149363	0.20772	0.513825	0.306105
uc008ivx.2,uc012bsn.1:chr2:+:26483976:26492017:Fam69b:<1.2:4-5-6-7>	IR	E2,E4	E2,E3,E4	1.92424	0.0439256	-1.88032	0.0021307	0.0149363	0.00616608	0.073614	0.067448
uc008xuq.1,uc008xur.1,uc008xus.1,uc008xut.1,uc012dxl.1:chr5:-:76641201:76733797:Clock::3-4-5-6-7-8-9.10-11-12-13-14-15-16-17-18-19-20-22-23	AFE	E1,E3	E2,E3	-0.254816	1.23329	1.48811	0.00212921	0.0149363	0.463332	0.160937	-0.302394
uc009rzi.1,uc009rzj.1,uc009rzk.1:chr9:+:117949616:117978912:AZ2,Azi2:<1-2-3:5-6-7	ES	E3,E5	E3,E4,E5	-20	-1.76354	18.2365	0.00215463	0.0150765	1	0.891943	-0.108057
uc007jql.2,uc007jqm.2,uc007jqn.2,uc011xww.1,uc011xwx.1:chr11:+:69393860:69405375:Trp53,p53:11.12-13:15>	A3SS	E13,E15	E13,E14,E15	2.09559	1.35792	-0.737677	0.00215948	0.015083	0.0809755	0.175649	0.0946736
uc007tno.2,uc007tnp.2,uc007tnq.2,uc007tnr.2,uc007tns.2,uc007tnt.2,uc007tnu.1:chr14:+:52604507:52625922:Arhgef40,mFLJ00128:28:30>	A3SS	E28,E30	E28,E29,E30	0.286701	-0.380033	-0.666734	0.00215912	0.015083	0.30256	0.475809	0.173248
uc007vkd.2,uc007vke.2,uc007vkf.2,uc011zru.1,uc011zrv.1:chr15:-:31221234:31297514:Ankrd33b:<1.2:	ALE	E2,E3,E6,E7	E2,E4	1.77691	20	18.2231	0.00216829	0.015104	0.546027	1	0.453973
uc009aks.1,uc009akt.1,uc009aku.1:chr5:+:144578660:144663586:Eif2ak1:<1-2-3-5-6-7-9-10-11-12-13-14-15:17>	ES	E15,E17	E15,E16,E17	-4.18741	-1.57447	2.61295	0.00216686	0.015104	0.993643	0.786877	-0.206765
uc009rvm.2,uc009rvn.2,uc009rvo.2:chr9:+:111020614:111128172:Lrrfip2:<1-2-3-4:6-7-8-9-10	ES	E4,E6	E4,E5,E6	3.90992	1.68675	-2.22317	0.00216839	0.015104	0.00785634	0.139631	0.131775
uc007lze.1,uc007lzf.1,uc007lzg.1,uc007lzh.1:chr11:-:106515531:106576595:Pecam1:<1.2-3-4-5-6-7-8-9-10-11-12:14	ES	E12,E14	E12,E13,E14	-1.49694	-2.27615	-0.77921	0.00217577	0.0151417	0.794575	0.896586	0.102011
uc007imn.2,uc011xth.1:chr11:-:43233749:43239750:Pttg1:3-4-5-6:8>	IR	E6,E8	E6,E7,E8	0.665761	2.01822	1.35246	0.0021882	0.0152143	0.145942	0.0228794	-0.123062
uc007itr.1,uc007its.1,uc007itt.1,uc007itu.1:chr11:+:51076672:51095266:Clk4:4.5:9-10-11-12-13-14-15-16-17>	ES	E5,E9	E5,E7,E9	0.285859	-1.48837	-1.77423	0.00220751	0.0153145	0.501824	0.770628	0.268804
uc007lck.1,uc007lcl.1,uc007lcm.1:chr11:+:96650449:96669954:Cbx1:<1-2-3-4:6-7>	A5SS	E4,E6	E4,E5,E6	-0.410436	0.833473	1.24391	0.00220833	0.0153145	0.219953	0.0598718	-0.160082
uc007ypo.1,uc007ypp.1,uc007ypq.1,uc007ypr.1,uc007yps.1,uc007ypt.1:chr16:-:20331376:20426467:Abcc5::3-4-5-6	AFE	E1,E3	E2,E3	1.25392	0.13079	-1.12313	0.00221221	0.0153145	0.220539	0.476396	0.255858
uc008flv.1,uc008flw.1,uc008flx.1:chr18:-:67385183:67405484:Mppe1:9:11	IR	E9,E10,E11	E9,E11	0.908454	-0.0926369	-1.00109	0.00221026	0.0153145	0.613455	0.313675	-0.29978
uc009czb.2,uc009czc.2,uc009cze.2:chr6:-:92722692:92851435:Adamts9:21-22-23-24-25-26-27-28:	ALE	E28,E29	E28,E30,E31,E32	-2.39788	-0.839671	1.55821	0.00221258	0.0153145	0.202416	0.602475	0.400059
uc007hhf.2,uc007hhg.2,uc007hhh.2:chr10:-:126305483:126338427:Xrcc6bp1:<1-2-3-4-5:	ALE	E5,E7	E5,E8	1.69137	0.654035	-1.03734	0.00222826	0.0154091	0.788336	0.542593	-0.245743
uc007lgl.1,uc007lgm.1,uc007lgn.1:chr11:-:98326006:98407345:Ikzf3::9-10>	AFE	E1,E2,E3,E5,E6,E7,E9	E8,E9	0.479669	-0.281351	-0.76102	0.00223873	0.0154676	0.7036	0.503604	-0.199996
uc008jaj.2,uc008jak.2,uc008jal.2,uc008jam.2,uc008jan.2,uc008jao.1:chr2:+:29745239:29787266:Odf2:<1-5:7	ES	E5,E7	E5,E6,E7	-1.66504	-2.72412	-1.05908	0.0022623	0.0156095	0.775786	0.910232	0.134446
uc009soj.2,uc009sok.2,uc009sol.2,uc009som.2,uc009son.2,uc012heo.1:chrX:-:7770975:7783651:Mporc-b,Porcn:10-11-12-13-14:	ALE	E14,E15	E14,E16,E17	-2.34936	-0.703012	1.64634	0.00226334	0.0156095	0.0427044	0.224194	0.18149
uc009les.1,uc009let.1,uc009leu.1:chr8:-:24351797:24367552:Golga7::3-4-6-8-9>	AFE	E1,E3	E2,E3	-0.147036	0.745496	0.892533	0.00227455	0.0156728	0.24984	0.127908	-0.121932
uc009bjz.2,uc009bka.1,uc012eka.1:chr6:-:38260496:38304603:Zc3hav1:6-7-8-9-10:	ALE	E10,E11	E10,E12,E13,E14	-0.3419	-2.023	-1.6811	0.00228225	0.0157117	0.459235	0.140324	-0.318911
uc007jql.2,uc007jqm.2,uc007jqn.2,uc011xww.1,uc011xwx.1:chr11:+:69393860:69405375:Trp53,p53:3-4-5-6-7-8-9:11.12-13	IR	E9,E10,E11	E9,E11	-1.51247	-2.47993	-0.967452	0.00228814	0.0157381	0.139363	0.0644467	-0.0749165
uc007bpn.2,uc007bpo.2,uc007bpp.2,uc007bpq.2,uc007bpr.2:chr1:-:75482399:75503027:Obsl1:19:	ALE	E19,E20	E19,E21,E22,E23,E24,E25,E26,E27	-0.131988	-1.36073	-1.22874	0.00233046	0.0160006	0.79487	0.542683	-0.252187
uc007idg.1,uc007idh.1,uc007idi.1,uc011xry.1:chr11:-:20585087:20641487:Aftph::10-11>	AFE	E1,E2,E3,E4,E5,E7,E8,E10	E9,E10	1.62303	2.62592	1.00289	0.00234599	0.0160928	0.700454	0.891518	0.191064
uc008txd.1,uc008txe.1,uc008txf.1,uc008txg.1,uc008txh.1,uc008txi.1,uc008txj.1,uc012dhr.1:chr4:+:102787069:102838354:Mier1:<1-2:6-8-9-10-11-14-16-17-18-19-20-21>	ES	E2,E6	E2,E3,E4,E6	1.71765	0.233615	-1.48404	0.00236072	0.0161794	0.127037	0.376779	0.249742
uc007ave.1,uc007avf.1,uc007avg.1,uc007avh.1,uc007avi.1:chr1:-:43104113:43155482:Tgfbrap1::6-8-9-10	AFE	E4,E6	E5,E6	-4.1407	-1.45263	2.68807	0.00237625	0.0162713	0.992786	0.860996	-0.13179
uc008pqe.1,uc008pqf.1,uc008pqg.2,uc008pqx.2,uc012cra.1:chr3:-:84299985:85691440:Arfip1,Glt28d2:<7-8-10:12-13-14-15-16>	ES	E10,E12	E10,E11,E12	-2.71717	-1.13375	1.58342	0.00238335	0.0163053	0.909427	0.729879	-0.179548
uc009sqq.2,uc009sqr.2,uc009sqs.2,uc009sqt.2,uc009squ.1,uc009sqv.1:chrX:-:11613863:11737481:Bcor,mKIAA1575:10-11:13-14-15-16-17-18-19-20>	A3SS	E11,E13	E11,E12,E13	0.524348	-0.488522	-1.01287	0.00239631	0.0163648	0.29383	0.516702	0.222872
uc007ihc.1,uc007ihd.1,uc007ihe.1,uc007ihf.1,uc011xsq.1:chr11:+:29426435:29445255:Mtif2:4:6	A5SS	E4,E6	E4,E5,E6	-0.427354	-2.09798	-1.67063	0.00242539	0.016534	0.405655	0.85488	0.449225
uc009onf.1:chr9:-:21775447:21793897:Rgl3:<1-2-3-4-5-6-7-8-9-10-11-12-13-14-15-16:18-19>	ES	E16,E18	E16,E17,E18	-1.98955	-3.01175	-1.0222	0.00242855	0.0165408	0.820746	0.929676	0.10893
uc009trg.1,uc009trh.2,uc009tri.2,uc009trj.1,uc009trl.1,uc009trm.1,uc009trn.1,uc009tro.1,uc009trp.2,uc009trq.1,uc009trr.2,uc012hll.1:chrX:+:80060248:82450389:Dmd,dystrophin:70-71-72-73-74-75-77-78-80-81-82-83-84-85-86:88>	ES	E86,E88	E86,E87,E88	0.336472	-1.88031	-2.21679	0.00245983	0.0167391	0.407461	0.848125	0.440664
uc007nin.2,uc007nio.2,uc007nip.2,uc007niq.2,uc007nir.1,uc007nis.2:chr12:+:33832550:34057222:Atxn7l1:16:	ALE	E16,E17	E16,E18	1.3238	-0.524822	-1.84862	0.00247291	0.0168131	0.935454	0.70437	-0.231084
uc007fyq.1,uc007fyr.1,uc007fys.1,uc007fyt.1,uc007fyu.1:chr10:-:78989173:78996532:Ppap2c:<1.2:4.5-6-7-8-10>	A5SS	E2,E4	E2,E3,E4	-1.2499	-2.62167	-1.37177	0.00248159	0.0168195	0.76379	0.927927	0.164136
uc007kgp.1,uc007kgq.1,uc007kgr.1,uc007kgs.1,uc007kgt.1,uc011xzu.1,uc011xzv.1:chr11:+:77275885:77283103:Coro6:<1:4-5-6-7	A3SS	E1,E4	E1,E3,E4	0.425071	-0.313293	-0.738365	0.00248698	0.0168195	0.338663	0.533738	0.195075
uc007rqb.1,uc007rqc.1,uc007rqd.1,uc011zdo.1:chr13:-:100787948:100874025:Bdp1,mKIAA1241:<9-10-11-12-13-14-15-16-17-18-19-20-21-22-23-24-25.26-27-28-29-30-31-32-33-34-35-36-37-38.39-40:	ALE	E40,E41	E40,E42	-3.02852	-1.06087	1.96765	0.00248517	0.0168195	0.233787	0.75108	0.517293
uc008kee.1,uc008kef.1,uc008keg.1:chr2:+:74550049:74586328:Hoxd3,Hoxd4::7	AFE	E1,E3,E4,E5,E7	E6,E7	1.57728	0.211838	-1.36544	0.00248381	0.0168195	0.444089	0.170962	-0.273127
uc008mja.2,uc008mjb.2,uc012cef.1,uc012ceg.1:chr2:+:130250055:130270005:Vps16,mVps16:<1-2-3-4-5-6-7:9	IR	E7,E9	E7,E8,E9	1.33317	0.574778	-0.758394	0.00248208	0.0168195	0.134407	0.258384	0.123977
uc009mao.2,uc009map.2,uc009maq.2,uc009mar.2,uc009mas.2:chr8:+:73051641:73059227:Fkbp8:8:	ALE	E8,E10,E11,E12,E13	E8,E9	2.20537	3.10763	0.902256	0.00248004	0.0168195	0.808476	0.900081	0.0916044
uc009oof.2,uc009oog.2:chr9:+:22030146:22047798:Zfp809:<1-2-3-4-5:	ALE	E5,E6	E5,E7	0.336472	3.31872	2.98225	0.00250997	0.0169302	0.616446	0.937888	0.321442
uc008nnr.1,uc008nnt.1,uc008nnu.1,uc008nnv.1,uc012chu.1,uc012chv.1:chr2:+:156439440:156590099:Dlgap4:14:16-17-18-19>	IR	E14,E16	E14,E15,E16	0.692753	1.44173	0.748982	0.0025305	0.0170537	0.144792	0.0675447	-0.077247
uc007nun.2,uc007nuo.2:chr12:+:72237834:72344290:2700049A03Rik:<21-22-23-24-25-26-27:	ALE	E27,E28	E27,E30	-1.64944	0.367322	2.01676	0.00254371	0.0171276	0.274173	0.838093	0.56392
uc009mmi.2,uc009mmj.2:chr8:-:86774474:86781223:Mri1:<1-2:	ALE	E2,E3	E2,E4,E5,E6	-1.87865	-0.922347	0.956302	0.00254776	0.0171399	0.325384	0.559898	0.234514
uc008ysb.1,uc008ysc.1:chr5:+:111759782:111817379:Pitpnb:<1-2-3-4-5-6-7-8-9-10:12>	ES	E10,E12	E10,E11,E12	-0.960192	0.630403	1.59059	0.00255795	0.0171933	0.658618	0.240127	-0.418491
uc008jjz.1,uc008jka.1,uc008jkb.1,uc012bul.1:chr2:-:35035724:35056640:Rab14::10.11>	AFE	E1,E2,E3,E4,E5,E6,E8,E10	E9,E10	1.63616	3.54251	1.90635	0.00256021	0.0171935	0.50756	0.910601	0.403041
uc007mlw.2,uc007mlx.2:chr11:+:116514847:116529703:Gm11744,Prcd::7>	AFE	E1,E7	E3,E4,E5,E6,E7	-0.993608	-20	-19.0064	0.00257642	0.0172872	0.738266	1	0.261734
uc008byw.2,uc008byx.2,uc008byy.2,uc008byz.1,uc008bza.2,uc008bzb.2:chr17:+:33766036:33782651:Pram1,Zfp414:<1:3-4-5	ES	E1,E3	E1,E2,E3	1.70175	0.693466	-1.00828	0.0025795	0.0172928	0.131125	0.275215	0.14409
uc009rmf.1,uc009rmg.1,uc009rmh.1,uc009rmi.1,uc009rmj.1,uc012haj.1:chr9:-:107500445:107511572:Sema3b:<1-2:	ALE	E2,E3,E4	E2,E6,E8,E9,E10,E11,E12,E13,E14,E15,E16,E17,E18,E19,E20,E21,E22,E23,E24,E25	-1.368	-0.458532	0.909471	0.00258591	0.0173206	0.669546	0.808593	0.139048
uc008jqk.2,uc008jql.2,uc012bvi.1:chr2:-:51779968:51790529:Rbm43:<1.2:5-6-7>	ES	E2,E5	E2,E4,E5	-1.78087	-20	-18.2191	0.00258889	0.0173255	0.867246	1	0.132754
uc009suw.1,uc009sux.1,uc009suy.1:chrX:+:23270187:23383127:Wdr44:<1.2:4-5-6>	IR	E2,E4	E2,E3,E4	-1.51305	-3.39167	-1.87862	0.00259866	0.0173606	0.76258	0.965396	0.202816
uc008avs.1,uc008avt.1,uc008avu.1:chr17:+:24551619:24562842:Rnps1:2:4-5-6-7-8-9>	ES	E2,E4	E2,E3	0.600898	-0.338219	-0.939118	0.0026054	0.0173905	0.233775	0.452302	0.218527
uc008frb.1,uc008frc.2,uc008frd.2,uc008fre.2,uc012bfb.1,uc012bfc.1:chr18:+:77303946:77394447:Miz1,Pias2::3-4-5-6-8-9-10-11-12-13-14-16-17.18>	AFE	E1,E3	E2,E3	3.75571	2.14494	-1.61077	0.00261219	0.0174206	0.0283729	0.0994967	0.0711238
uc007yet.1,uc007yeu.1,uc007yev.1,uc007yew.1,uc007yex.1:chr16:-:11075003:11134625:Txndc11:7:9-10.11	ES	E7,E9	E7,E8,E9	-0.174425	-1.50132	-1.32689	0.00261989	0.0174568	0.636549	0.736506	0.0999571
uc008yog.1,uc008yoh.1,uc008yoi.1,uc008yoj.1,uc008yok.1,uc008yol.1,uc008yom.1,uc008yon.1,uc008yoo.1:chr5:-:108998432:109058758:Gak:21:23-24-25-27-28-29-30	ES	E21,E23	E21,E22,E23	-3.60457	-1.85961	1.74496	0.00262785	0.0174947	0.983396	0.805561	-0.177834
uc007wkv.2,uc007wkw.2,uc011zuw.1:chr15:+:76406788:76426241:Adck5:13:15-16-17-18-19>	IR	E13,E15	E13,E14,E15	-0.139054	1.02228	1.16134	0.00265144	0.0176009	0.47626	0.216962	-0.259298
uc008gaa.1,uc008gab.1:chr19:-:4425456:4439424:Rhod:<1-2-3-4:6>	IR	E4,E6	E4,E5,E6	0.951559	-0.110078	-1.06164	0.00264924	0.0176009	0.138339	0.344663	0.206324
uc008wee.1,uc008wef.1,uc008weg.1,uc008weh.1,uc012dqt.1,uc012dqu.1,uc012dqv.1:chr4:-:155028580:155043336:Mib2,dyslike:14-15:18-20-21-22-23-24-25-26-27-28.29.30>	IR	E15,E18	E15,E16,E17,E18	0.425221	1.02702	0.6018	0.00265298	0.0176009	0.331406	0.203979	-0.127427
uc008wse.1,uc012dte.1,uc012dtf.1:chr5:+:24092567:24101685:2010209O12Rik,Chpf2:<1-2:4-5.6.7.8-9-10>	IR	E2,E4	E2,E3,E4	-0.486709	-1.0905	-0.603795	0.00266007	0.0176175	0.310706	0.428219	0.117513
uc009rzr.1,uc009rzs.1,uc009rzt.1,uc009rzu.1,uc009rzv.1:chr9:+:118415435:118491637:Golga4:<1-2-3-4-5-7-8-9-10:12-13	ES	E10,E12	E10,E11,E12	0.396821	-1.55755	-1.95437	0.00265951	0.0176175	0.362857	0.783135	0.420278
uc008dcf.1,uc008dcg.1,uc008dch.1,uc008dci.1,uc012avu.1:chr17:-:56700395:56724006:Safb2:17-18-19-20-21-22-23:25.26>	IR	E23,E25	E23,E24,E25	0.737002	-0.15482	-0.891822	0.00270142	0.0178298	0.22614	0.440648	0.214508
uc009dem.2,uc009den.2,uc009deo.2,uc012eqa.1:chr6:-:113017422:113027238:Gt(ROSA)26Sor:<1:3	A5SS	E1,E3	E1,E2,E3	-2.15869	-0.666499	1.49219	0.0026999	0.0178298	0.845687	0.538177	-0.30751
uc009gev.1,uc009gew.1:chr7:+:31337571:31340458:Hspb6::3-4>	AFE	E1,E3	E2,E3	-0.98319	-2.44496	-1.46177	0.00269975	0.0178298	0.642931	0.910967	0.268036
uc007hwu.1,uc007hwv.1,uc007hww.1,uc007hwx.1,uc011xre.1:chr11:-:5613419:5662379:Urgcp::4-5-6-7-8.9.10.11>	AFE	E1,E4	E2,E4	0.388673	-1.04641	-1.43509	0.00270705	0.0178516	0.776279	0.951098	0.174818
uc008xmj.1,uc008xmk.1,uc008xml.1,uc008xmm.1,uc008xmn.1:chr5:+:64551059:64742725:Tbc1d1,mKIAA1108:7-8-9-10-11-12-13-14-15:	ALE	E15,E16	E15,E18,E19,E20,E21,E22,E23,E24,E25,E26	-3.17608	-1.09598	2.0801	0.00271387	0.0178813	0.381588	0.80933	0.427742
uc009gpl.1,uc009gpm.1,uc009gpn.1:chr7:+:51723425:51727021:Josd2:6-7:9-10>	A3SS	E7,E9	E7,E8,E9	1.70233	1.09411	-0.608225	0.00271847	0.0178962	0.0818397	0.168139	0.0862996
uc007xwc.2,uc007xwd.2,uc007xwe.2:chr15:-:102328077:102347435:Map3k12::3-5	AFE	E1,E3	E2,E3	0.393043	2.77259	2.37955	0.00272249	0.0179073	0.555638	0.0523256	-0.503312
uc008xvz.2,uc008xwa.2:chr5:+:77694518:77712722:Rest::3-4-5>	AFE	E1,E3	E2,E3	-1.47437	1.23675	2.71112	0.00273223	0.0179496	0.848565	0.282062	-0.566503
uc007nfw.2,uc007nfx.2,uc007nfy.2,uc007nfz.2,uc007nga.2,uc011ylc.1:chr12:-:29375492:29435318:Ttc15:12:	ALE	E12,E13	E12,E14,E15,E16,E17,E18	-0.987805	-2.57498	-1.58718	0.00274315	0.0179969	0.366213	0.0726632	-0.29355
uc008tfz.1,uc012dfx.1,uc012dfy.1:chr4:+:63017195:63020545:Orm3:3:5.6	A5SS	E3,E5	E3,E4,E5	-0.213863	-1.43904	-1.22517	0.00276057	0.0180957	0.486668	0.78368	0.297011
uc008hqw.2,uc008hqx.2,uc008hqy.2,uc008hqz.2,uc008hra.2,uc012bmn.1:chr19:+:45438223:45607833:Btrc,Fbxw11,mKIAA4123:3:7-8-9-10-11-12-13-14-15-16	ES	E3,E7	E3,E6	-1.32524	-2.70062	-1.37538	0.00276841	0.0181317	0.740154	0.90057	0.160416
uc007qeq.2,uc007qer.2,uc007qes.2:chr13:+:41096378:41108402:Pak1ip1:<1-2-3:5-7	IR	E3,E5	E3,E4,E5	1.0433	2.2156	1.1723	0.00278432	0.0182048	0.192857	0.030039	-0.162818
uc009mim.1,uc009min.2:chr8:-:81790322:81818855:Mmaa:4:6-7-8-9-10>	A5SS	E4,E6	E4,E5,E6	-0.689005	-1.57352	-0.884515	0.00279597	0.0182654	0.651617	0.825755	0.174138
uc007okx.1,uc007oky.1,uc007okz.1,uc007ola.1,uc007olb.1:chr12:-:93044482:93087597:Sel1l:<1-2-3-5:8-9-10-11-12-13-14-15-17-18-19-20-21-22-23-24-25>	A5SS	E5,E8	E5,E6,E8	-3.19351	-1.39221	1.8013	0.00280582	0.0183142	0.934218	0.730861	-0.203357
uc009mgo.3,uc009mgp.2,uc009mgq.3,uc012gfz.1:chr8:+:75247186:75282102:Sin3b:10-11-12-13-14-15-16-17-18-19-20:22-23>	IR	E20,E22	E20,E21,E22	-0.247587	0.560605	0.808192	0.002836	0.0184954	0.374272	0.21143	-0.162842
uc008bwg.1,uc008bwh.1,uc008bwi.1,uc012aox.1:chr17:-:32440620:32458098:AKAP95,Akap8:<1-2-3-4:6-7-8-9	IR	E4,E6	E4,E5,E6	0.788441	0.0174421	-0.770999	0.00284524	0.01854	0.147468	0.263556	0.116088
uc007axm.1,uc007axn.1,uc007axo.1,uc007axp.1:chr1:-:51522850:51535263:Nabp1,Obfc2a:12:	ALE	E12,E13	E12,E14	1.09495	-1.17951	-2.27446	0.00284921	0.018542	0.977708	0.740083	-0.237625
uc008cxd.1,uc008cxe.1,uc008cxf.1,uc008cxg.1,uc012avc.1:chr17:+:48438863:48451859:Treml2:<2.3-4:8-9-10>	A3SS	E4,E8	E4,E7,E8	-1.00631	-2.335	-1.32869	0.00285039	0.018542	0.638487	0.850204	0.211717
uc009gei.1,uc009gej.1:chr7:+:31206750:31213765:Nfkbid::3-4-5-6-7-8-9-10-11-12-13>	AFE	E1,E3	E2,E3	2.0928	0.544568	-1.54823	0.00285425	0.0185514	0.114182	0.577033	0.462851
uc007yqs.1,uc007yqt.1,uc007yqu.1,uc007yqv.1,uc007yqw.1,uc012acy.1:chr16:+:20672821:20692956:Eif4g1:2:4-6-7-8-9-10-11-12-13-14-15	ES	E2,E4	E2,E3	-1.52861	-2.88921	-1.3606	0.00286545	0.0185927	0.803438	0.945444	0.142006
uc009ina.1,uc012fqd.1:chr7:+:107621499:107634941:Ucp3:<1-2-3:5-6-7-8>	IR	E3,E5	E3,E4,E5	0.591834	1.16792	0.576088	0.00286445	0.0185927	0.23477	0.141683	-0.0930874
uc008eif.1,uc008eig.1,uc008eih.1,uc008eii.1,uc008eij.1,uc008eik.1:chr18:+:31919533:31942383:Ammecr1l:4-6-7-8:	ALE	E8,E10,E12	E8,E9	0.940491	2.67952	1.73903	0.00288467	0.0187016	0.558156	0.915327	0.357171
uc009fcm.1,uc012exq.1:chr7:-:7165706:7231000:Vmn2r29::8	AFE	E1,E2,E3,E4,E8	E7,E8	20	1.71432	-18.2857	0.00291934	0.0189104	1	0.891999	-0.108001
uc008khd.2,uc008khe.1,uc008khf.1,uc008khg.1,uc012bxz.1,uc012bya.1:chr2:-:79674609:79969569:Pde1a:<4-5-8-9-10-11-12-13-14-15-16-17-18:	ALE	E18,E20	E18,E21,E22	1.42746	-0.22712	-1.65458	0.00292889	0.0189563	0.98293	0.897401	-0.0855286
uc009ltk.2,uc009ltl.2,uc009ltm.2,uc009ltn.2,uc009lto.2,uc009ltp.2,uc009ltq.2:chr8:-:63389185:63462108:CLCN3,Clcn3:<1:4-6.7-8-10-11-12-14-16-17-18	ES	E1,E4	E1,E2,E4	0.945805	-0.744443	-1.69025	0.00293959	0.0190095	0.248577	0.552187	0.30361
uc008iyg.1,uc008iyh.1,uc008iyi.1,uc008iyj.1,uc008iyk.1,uc012bsy.1:chr2:+:28323480:28326697:MRP-S2,Mrps2:7:	ALE	E7,E8	E7,E9	-0.949081	-2.47293	-1.52385	0.00295586	0.0190986	0.8709	0.457898	-0.413003
uc007bgx.1:chr1:+:64737786:64772216:Ccnyl1:<1-2-3:5-6-7-8-9-10>	ES	E3,E5	E3,E4,E5	-1.19545	-3.04477	-1.84932	0.00297401	0.0191836	0.747028	0.940088	0.19306
uc009djz.1,uc009dka.1,uc009dkb.1:chr6:+:116288039:116359558:March8:<1.2:4	IR	E2,E4	E2,E3,E4	-0.786003	-2.47963	-1.69363	0.00297162	0.0191836	0.632984	0.921131	0.288147
uc007iaj.1,uc007iak.1,uc007ial.1,uc007iam.1,uc007ian.1,uc007iao.1,uc007iap.1,uc007iaq.1,uc011xrn.1:chr11:+:11586215:11672929:Ikzf1:3-4:6	ES	E4,E6	E4,E5,E6	-0.325042	-1.36325	-1.03821	0.00300282	0.0193369	0.425736	0.688133	0.262397
uc008inx.1,uc008iny.1,uc008inz.1,uc008ioa.1:chr2:+:22923720:22970032:Acbd5::3	AFE	E1,E3	E2,E3	-1.24463	-0.421786	0.822841	0.00301874	0.0194147	0.585787	0.38974	-0.196046
uc009kqa.1,uc009kqb.1:chr7:-:150981498:151008746:Nadsyn1:3-4-5-6-7:9-10-11-12-13-14-15-16-17-18-19-20-21>	ES	E7,E9	E7,E8,E9	-0.909679	-2.09382	-1.18414	0.00301994	0.0194147	0.63549	0.825489	0.189999
uc007zma.1,uc007zmb.1,uc007zmc.1,uc012agp.1:chr16:-:56015620:56029830:Pcnp::3	AFE	E1,E3	E2,E3	3.16894	1.70233	-1.4666	0.00302516	0.0194319	0.0602743	0.146145	0.0858707
uc007cpu.2,uc007cpv.2,uc007cpx.2:chr1:+:135142673:135200012:Plekha6::21-22-23-24-25>	AFE	E16,E17,E18,E19,E21	E20,E21	3.52636	1.1977	-2.32866	0.00303402	0.0194725	0.942497	0.506568	-0.435929
uc009jyy.1,uc009jyz.1,uc009jza.1,uc012fut.1:chr7:-:135583290:135605027:Tial1:3:5-6-7-8-9-10-11-12-13-14>	A3SS	E3,E5	E3,E4,E5	0.269939	2.09513	1.82519	0.00303962	0.0194922	0.161616	0.0893713	-0.0722449
uc008zqc.2,uc012edm.1,uc012edn.1:chr5:+:125002872:125019669:Ddx55:<1-2-3:5-6-7-8-9-10-11-12-13.14-15-16>	IR	E3,E5	E3,E4,E5	-0.801364	0.127531	0.928895	0.00304459	0.0195077	0.201269	0.0879792	-0.11329
uc007xvk.2,uc007xvl.2:chr15:-:102168677:102181190:Aaas::8-9-10-11-12-13-14-15-16-17-18>	AFE	E1,E3,E4,E5,E6,E8	E7,E8	1.62794	2.84312	1.21518	0.00304741	0.0195096	0.704117	0.895823	0.191706
uc009knj.2,uc009knk.2,uc009knl.2,uc009knm.2,uc009knn.2,uc009kno.2,uc009knp.2,uc009knq.2,uc009knr.2,uc009kns.2,uc009knt.2,uc009knu.2,uc009knv.2,uc009knw.2,uc009knx.2,uc012fxm.1:chr7:+:149684740:149701914:Tnnt3:10-11-12-13-14-15-16:19>	ME	E16,E17,E19	E16,E18,E19	-0.179775	-1.44267	-1.26289	0.00305385	0.0195345	0.495391	0.126696	-0.368694
uc008inr.1,uc008ins.1,uc008int.1,uc008inu.1,uc008inv.1,uc008inw.1:chr2:-:22795508:22895760:Abi1:9:11-12>	ES	E9,E10,E11	E9,E11	-0.333506	0.718168	1.05167	0.0030704	0.0196197	0.367152	0.616556	0.249404
uc008rdi.1,uc008rdj.2,uc008rdk.2,uc008rdl.2,uc008rdm.2:chr3:-:119421463:119486306:Ptbp2:5-6-7-8-11-12:14-15-16	ES	E12,E14	E12,E13,E14	1.3632	-0.592968	-1.95616	0.00308615	0.0196919	0.119508	0.583692	0.464184
uc007tlt.1,uc007tlu.1,uc011zjy.1:chr14:-:51443735:51490229:AK087740,Tep1:<1-2-3-4-5-6-7-8-9-10-11-12-13-14-15-16-17-18-19-20-21-22-23-24-25.26-27-28-29-30-31-32-33-34-35-36-37-38-39-40-41-42:46-47-49-50-51-52-53-54-55-56-57-58-59>	ES	E42,E46	E42,E43,E44,E46	-2.07494	-3.56635	-1.49141	0.00309638	0.0197407	0.842165	0.956069	0.113904
uc007wpr.1,uc007wps.1,uc007wpt.1,uc007wpu.1,uc007wpv.1,uc011zvu.1:chr15:+:78427476:78452449:Cyth4,mFLJ00017:<1-2-3-5-6-7-8:12-14-15	IR	E8,E12	E8,E9,E10,E11,E12	-0.205081	0.426327	0.631409	0.00310512	0.0197636	0.140593	0.0874724	-0.0531207
uc009ivw.1,uc009ivx.1,uc009ivy.1,uc009ivz.1:chr7:-:111448410:111464009:Trim12,Trim12a,Trim5:5:7-9-10-12-13>	ES	E5,E7	E5,E6,E7	-20	-2.05889	17.9411	0.00310307	0.0197636	1	0.880701	-0.119299
uc007fqu.1,uc007fqv.1,uc007fqw.1,uc007fqx.1,uc007fqy.1,uc007fqz.1,uc011xgr.1:chr10:-:75108854:75227102:Cabin1:<1-2-3-4-5-6-7-8-9-10-11-12-13-14-15-16-17-18-19-20-21-22-23-24:	ALE	E24,E25	E24,E26,E27	-1.14593	-2.63762	-1.49169	0.00312091	0.0198476	0.115689	0.0285113	-0.0871775
uc007ozv.1,uc007ozw.1,uc007ozx.1,uc007ozy.1,uc007ozz.1,uc007paa.1:chr12:+:109792929:109926725:Evl:5-6-7-8-9-10-11-12-13:15-16	ES	E13,E15	E13,E14,E15	-0.842905	-0.1476	0.695304	0.00312387	0.01985	0.629734	0.460605	-0.169128
uc007yrw.2,uc007yrx.2,uc007yry.2,uc012adm.1:chr16:+:22009556:22049342:Senp2::13-14-15-16-17-18-19>	AFE	E12,E13	E1,E2,E4,E5,E6,E7,E8,E9,E10,E11,E13	0.411248	-1.24757	-1.65882	0.0031432	0.0199564	0.389041	0.75554	0.366499
uc008ruf.2,uc008rug.2,uc008rui.2,uc012czq.1,uc012czr.1,uc012czs.1,uc012czt.1:chr3:-:153570252:153575957:Rabggtb:10-11:13-14-15>	A3SS	E11,E13	E11,E12,E13	-0.907525	-1.82102	-0.913498	0.00314999	0.0199664	0.715402	0.877841	0.162439
uc009soj.2,uc009sok.2,uc009sol.2,uc009som.2,uc009son.2,uc012heo.1:chrX:-:7770975:7783651:Mporc-b,Porcn:<1-2-3.4-5-6-7:10-11-12-13-14	ES	E7,E10	E7,E8,E9,E10	2.18978	0.506615	-1.68316	0.00314751	0.0199664	0.0767377	0.357469	0.280732
uc008fal.1,uc008fam.1:chr18:+:60720439:60732383:Rbm22:9:	ALE	E9,E10	E9,E11,E12,E13	-1.65598	-2.77849	-1.12251	0.00315801	0.0200008	0.217423	0.0711536	-0.14627
uc009mbp.2,uc009mbq.1,uc012gfh.1:chr8:-:73302015:73320887:Mast3:<3-4-5-6-7-8-9-10-11-12-13-14-15-16-17-18-19-20-21-22-23-24-25-26-27:29>	A5SS	E27,E29	E27,E28,E29	0.0978654	0.989348	0.891483	0.00316301	0.0200159	0.410939	0.227072	-0.183868
uc007crx.1,uc007cry.1:chr1:+:136312043:136328918:Adipor1::3-4-5-6-7-8-9>	AFE	E1,E3	E2,E3	2.08052	1.05192	-1.0286	0.00326567	0.0206485	0.0536199	0.14762	0.0940002
uc009iao.1,uc009iap.1,uc009iaq.1,uc009iar.1:chr7:-:87494678:87516012:Man2a2:<1-2:4-5-6-7-8-9-10-11-12	IR	E2,E4	E2,E3,E4	-0.0290213	0.999489	1.02851	0.00327162	0.0206691	0.179987	0.0758836	-0.104104
uc008mfk.2:chr2:-:127261950:127270301:Fahd2a:<1:4-5-6-7-8>	ES	E1,E4	E1,E2,E3,E4	-2.46694	-3.88395	-1.417	0.00330763	0.0208622	0.823893	0.954197	0.130304
uc007bnz.1,uc007boa.1,uc007bob.1,uc007boc.1,uc011wnh.1:chr1:-:75177438:75188497:Atg9,Atg9a::10-11	AFE	E1,E2,E3,E4,E5,E6,E7,E10	E9,E10	1.10866	2.45112	1.34246	0.00332033	0.0208657	0.545204	0.825202	0.279999
uc007iyu.1,uc007iyv.1:chr11:-:54863239:54891633:Ccdc69:<1-2-3-4-5-6:	ALE	E6,E7	E6,E8	-1.10474	-2.53504	-1.43029	0.00332276	0.0208657	0.380567	0.116219	-0.264348
uc007jrz.2,uc007jsa.2,uc011xxb.1:chr11:+:69659873:69665560:Plscr3:<2.3:5-6-7-8-9-10-11>	IR	E3,E5	E3,E4,E5	0.0213737	0.749083	0.72771	0.00332378	0.0208657	0.338066	0.201359	-0.136707
uc007mni.1,uc007mnj.1,uc007mnk.1,uc007mnl.1:chr11:+:117515602:117624753:AK157659,Tnrc6c:<2-3-4-5-6-7-8-9-10-11:14-15-17-18	ES	E11,E14	E11,E13,E14	-1.77466	-0.645062	1.1296	0.00332432	0.0208657	0.792529	0.594225	-0.198305
uc008eob.1,uc008eoc.1,uc008eod.1:chr18:+:36838868:36843516:Slc35a4:<1-2-3.4:6>	IR	E4,E6	E4,E5,E6	0.19991	-0.616374	-0.816284	0.00331765	0.0208657	0.380386	0.561983	0.181597
uc008fyp.1,uc008fyq.1:chr19:-:4114445:4125827:Aip::3-4-5-6-7-8>	AFE	E1,E3	E2,E3	0.213249	1.23148	1.01823	0.00333687	0.0209114	0.731616	0.47316	-0.258457
uc009fqv.2,uc009fqw.2,uc009fqx.2,uc009fqy.2,uc009fqz.2,uc009fra.1,uc009frb.1:chr7:+:25688004:25711610:Arhgef1,mFLJ00369:14-15:19-20-21-22-23-24-25-26-27-28-29-30-31-32-33-34>	ES	E15,E19	E15,E17,E18,E19	-1.99015	-1.10945	0.880698	0.00333722	0.0209114	0.831961	0.656069	-0.175891
uc007bbv.2,uc007bbw.2,uc007bbx.2,uc007bby.2:chr1:-:58487836:58502330:Ppil3:3:	ALE	E3,E4	E3,E5,E6,E7,E8,E9,E11	-1.38041	-3.46709	-2.08668	0.00335547	0.0209905	0.243112	0.0354941	-0.207618
uc007wae.1,uc007waf.1,uc007wag.1,uc007wah.1,uc007wai.1,uc007waj.1,uc007wak.1,uc007wal.1,uc007wam.1,uc007wan.1,uc007wao.1:chr15:+:66409133:66476817:Phf20l1::24-25-26-27	AFE	E17,E18,E20,E24	E22,E23,E24	20	1.93721	-18.0628	0.00335545	0.0209905	0	0.136011	0.136011
uc008pxk.1,uc008pxl.1,uc008pxm.1,uc008pxn.1:chr3:-:88887900:88897285:Rusc1:<4-5-6-7.8:10-11-12-13-14>	IR	E8,E10	E8,E9,E10	1.13375	2.07383	0.940082	0.00335804	0.0209905	0.179549	0.0765251	-0.103024
uc007pap.2,uc007paq.2,uc007par.2,uc007pat.2,uc007pau.2,uc007pav.2,uc011ysb.1:chr12:+:110779205:110809939:Meg3:<1-2:4	A5SS	E2,E4	E2,E3,E4	0.679812	0.163547	-0.516265	0.00338367	0.0211163	0.301312	0.413293	0.111981
uc009lie.1,uc009lif.1,uc009lig.1:chr8:-:28336247:28340060:Adrb3:4:6.7>	A3SS	E4,E6	E4,E5,E6	2.84499	1.85149	-0.993504	0.00339	0.0211386	0.0365791	0.106201	0.0696216
uc007tno.2,uc007tnp.2,uc007tnq.2,uc007tnr.2,uc007tns.2,uc007tnt.2,uc007tnu.1:chr14:+:52604507:52625922:Arhgef40,mFLJ00128:8-9-10-11-12-13-14-15-16-17-18:	ALE	E18,E19	E18,E20,E21,E22,E23,E24	-3.63325	-1.89152	1.74173	0.00341213	0.0212421	0.0843073	0.319706	0.235399
uc008fqs.1,uc008fqt.1,uc008fqu.1:chr18:+:77182853:77210910:Hdhd2::3-4-5-7-8-9>	AFE	E1,E3	E2,E3	2.67964	1.66094	-1.01869	0.00341162	0.0212421	0.0432025	0.105827	0.0626244
uc009lkk.1,uc009lkl.1,uc009lkm.1,uc009lkn.1:chr8:-:34893115:35040313:Rbpms:<1-2-3-4-5-6:	ALE	E6,E7	E6,E8	-0.204207	0.788808	0.993015	0.00341939	0.0212701	0.186538	0.410703	0.224165
uc009axm.2,uc009axn.2,uc009axo.2,uc009axt.1,uc009axu.1,uc009axv.1,uc009axw.1,uc012eia.1:chr6:+:8209287:8547548:Gig18,Glcci1,mCG_2776::18.19>	AFE	E13,E14,E15,E16,E18	E17,E18	3.24486	1.36769	-1.87717	0.00342301	0.0212753	0.976719	0.900218	-0.0765014
uc009dkj.1,uc009dkk.1,uc009dkl.1:chr6:-:116574033:116578995:Zfp422::4>	AFE	E1,E4	E2,E4	1.31425	3.09331	1.77906	0.00343375	0.0213248	0.0742673	0.024031	-0.0502363
uc008ljl.1,uc008ljm.1,uc008ljn.1,uc012can.1:chr2:+:103909961:103931347:Cd59b:<1-4-5:8>	ES	E5,E8	E5,E7,E8	-0.565414	0.920479	1.48589	0.00344175	0.0213572	0.542377	0.177917	-0.364461
uc009lzc.1,uc009lzd.1,uc009lze.1,uc012geu.1,uc012gev.1,uc012gew.1:chr8:+:72696309:72707562:Tmem161a:<1:3-4-5-6	ES	E1,E3	E1,E2,E3	-0.413103	-1.26217	-0.849068	0.00345251	0.0214067	0.514399	0.704255	0.189856
uc007qkl.1,uc007qkm.1,uc011yzg.1:chr13:+:50513245:50529138:Fbxw17:4-5-6-7:	ALE	E7,E10	E7,E8	-0.405465	0.602175	1.00764	0.00346062	0.0214397	0.80438	0.916527	0.112147
uc008jtr.1,uc008jts.1,uc008jtt.1,uc008jtu.1,uc008jtv.1,uc012bvt.1:chr2:-:59737419:59963867:Baz2b:15-16-17-18-19-20-21-22-23-24-25-26-27-28-29-30-31-32-33-34-35-36:38-39-40-41-42>	A5SS	E36,E38	E36,E37,E38	-3.79102	-1.51479	2.27623	0.00346591	0.0214551	0.961686	0.765563	-0.196123
uc008xis.1,uc008xit.1,uc008xiu.1:chr5:-:44863371:45190946:Ldb2:8:10>	ES	E8,E10	E8,E9,E10	-0.48239	1.00414	1.48653	0.0034695	0.02146	0.531907	0.192056	-0.339851
uc009guh.1,uc009gui.1,uc009guj.1,uc009guk.1:chr7:-:52489001:52494454:Cd37:<2.3-4-5-6-7-8:10	IR	E8,E10	E8,E9,E10	-1.31717	-0.487804	0.829367	0.00352382	0.0217784	0.531597	0.300931	-0.230666
uc008mqj.1,uc008mqk.1,uc008mql.1,uc008mqm.1,uc012cff.1:chr2:-:143773130:143836999:Rrbp1:<1-2.3.4.5.6.7:	ALE	E7,E8	E7,E9,E10,E11,E12,E13,E14,E15,E16,E17,E18,E19,E20,E21,E22,E23,E24,E25	-2.27437	-1.26288	1.01148	0.00355007	0.0219054	0.356792	0.615877	0.259085
uc009fwo.2,uc009fwp.2,uc009fwq.2:chr7:+:28338313:28367117:2310022A10Rik:<1-2-4-5-6-7-8-10-11-12:14>	IR	E12,E14	E12,E13,E14	-2.23188	-0.80099	1.43089	0.00354945	0.0219054	0.738575	0.384958	-0.353617
uc007lsb.2,uc011yfs.1:chr11:-:102337229:102417472:Gpatch8::5-6-7-9-10>	AFE	E1,E2,E3,E5	E4,E5	0.182528	1.88208	1.69955	0.00355743	0.0219332	0.663457	0.86678	0.203322
uc008yib.1,uc008yic.1:chr5:+:101227777:101233488:Mrps18c:<1-2-3:5-7>	ES	E3,E5	E3,E4,E5	-4.0126	-2.01748	1.99513	0.00356405	0.0219564	0.994889	0.914293	-0.0805961
uc008vak.2,uc008val.2,uc008vam.2,uc008van.2,uc008vao.1,uc012dma.1,uc012dmb.1,uc012dmc.1:chr4:-:131479340:131631228:Epb4.1:21:25	ES	E21,E25	E22,E25	20	0.893818	-19.1062	0.00357757	0.022022	0	0.268261	0.268261
uc008sqv.1,uc012ddc.1,uc012ddd.1:chr4:+:43681842:43705539:Tmem8b:<2-3-4:6-7-8-9-10-11-12-13>	ES	E4,E6	E4,E5,E6	-2.54945	-1.58241	0.967036	0.00362776	0.0223131	0.860113	0.714126	-0.145987
uc008ivh.1,uc008ivi.1,uc008ivj.1:chr2:-:26264950:26300736:Sec16a:<1-2-3-5-6-7-8-9-10-11-12-13-14-15-16-17-18-19-20-21-22-23-24-25-26-27-28-29:31-32>	ES	E29,E31	E29,E30,E31	0.560678	-0.135551	-0.696229	0.00363993	0.02237	0.313042	0.478	0.164959
uc008tgf.1,uc008tgg.1,uc008tgh.1,uc008tgi.1,uc008tgj.1,uc008tgk.1,uc008tgl.1,uc008tgm.1,uc008tgn.1,uc008tgo.1,uc008tgp.1:chr4:-:63075943:63156985:Whrn,mKIAA1526:9-10:	ALE	E10,E12	E10,E15,E16	-0.334746	-1.89201	-1.55727	0.00366765	0.0225159	0.697355	0.236289	-0.461066
uc009snh.2,uc009sni.2,uc009snj.2,uc012hen.1:chrX:-:7507247:7525015:Hdac6:3-4-5-6-7-8-9-10-11-12-13-14:17	IR	E14,E17	E14,E15,E16,E17	1.30833	2.85263	1.5443	0.00366953	0.0225159	0.168127	0.0295708	-0.138556
uc007ebj.2,uc007ebk.2,uc007ebl.2,uc007ebm.2,uc007ebn.2,uc007ebo.2,uc007ebp.1,uc007ebq.2:chr1:+:192748986:192770370:Angel2:<6:8	A5SS	E6,E8	E6,E7,E8	-0.498604	1.76695	2.26556	0.00370598	0.0226789	0.509462	0.221585	-0.287877
uc008swj.1,uc008swk.1,uc008swl.1,uc012def.1:chr4:+:52452120:52501131:Smc2:<2.3:6>	A5SS	E3,E6	E3,E4,E6	-2.2637	-0.746681	1.51702	0.0037064	0.0226789	0.873846	0.569676	-0.30417
uc008zqu.1,uc008zqv.1,uc008zqw.1,uc008zqx.1,uc008zqy.1,uc008zqz.1,uc008zra.1,uc008zrb.1,uc008zrc.1,uc012edq.1:chr5:-:125497524:125659584:Ncor2:47-48-49-50-51-52-53:55-56>	ES	E53,E55	E53,E54,E55	-0.971813	-1.75456	-0.782749	0.00370792	0.0226789	0.587044	0.751555	0.164512
uc009pkq.1,uc009pkr.1,uc009pks.1:chr9:+:50576342:50580775:Fdxacb1::3-4	AFE	E1,E3	E2,E3	2.82551	1.33744	-1.48807	0.00370156	0.0226789	0.0517906	0.202663	0.150872
uc007xuw.1,uc007xux.1,uc007xuy.1,uc007xuz.1,uc007xva.1:chr15:+:102034078:102046032:Zfp740:5:7	A3SS	E5,E7	E5,E6,E7	0.0183262	-0.795485	-0.813812	0.00375184	0.0229293	0.46687	0.655969	0.189099
uc007ckx.1,uc007cky.1,uc007ckz.1,uc007cla.1,uc007clb.1:chr1:+:129670740:129702509:Ccnt2:<1-2-3-5-7-10:12-13-14	A5SS	E10,E12	E10,E11,E12	-1.5934	-0.137026	1.45637	0.00376193	0.0229726	0.777745	0.313868	-0.463876
uc008qoa.2,uc008qob.2,uc008qoc.2,uc008qod.2:chr3:-:96515817:96531362:Polr3c:<1-2-3:5-8-9-10-12-13-14-15-16-17-18-19>	IR	E3,E5	E3,E4,E5	0.752834	1.46039	0.707557	0.00376655	0.0229825	0.243063	0.137491	-0.105572
uc007lyf.1,uc007lyg.1,uc007lyh.1,uc007lyi.1,uc007lyj.1,uc011ygi.1:chr11:-:106024649:106077681:Ccdc47,Strada:17:20-21-22	ES	E17,E20	E17,E18,E20	0.752365	-0.551365	-1.30373	0.00378437	0.0230729	0.303568	0.590151	0.286584
uc009olu.2,uc009olv.2,uc009olw.2:chr9:+:21351337:21393909:Carm1:5-6-7-8-9-10-11-12-13-14-15:17>	ES	E15,E17	E15,E16,E17	-1.3407	-2.11798	-0.777271	0.0037912	0.0230962	0.751457	0.875774	0.124316
uc007wyj.1,uc007wyk.1,uc007wyl.1:chr15:-:82052173:82054769:Tnfrsf13c:<1.2:	ALE	E2,E3	E2,E4	-2.40951	-1.34373	1.06577	0.00382327	0.0232731	0.144617	0.299517	0.154901
uc012gbp.1,uc012gbq.1:chr8:+:28087807:28091934:Zfp703:<1:3>	ES	E1,E3	E1,E2,E3	1.63479	2.46236	0.82757	0.00383887	0.0233496	0.113739	0.0464009	-0.0673382
uc009rtg.1,uc009rth.1,uc009rti.1,uc009rtj.1,uc009rtk.1,uc009rtl.1:chr9:-:109986823:110019918:Dhx30,HELG::10-11-12-13-14-15-16-17-18-19-20-21-22-23-24-25-26-27>	AFE	E7,E8,E10	E9,E10	-1.1636	0.0266477	1.19025	0.00385219	0.023412	0.283029	0.584142	0.301113
uc007jit.1,uc007jiu.1,uc007jiv.1,uc007jiw.1,uc007jix.1,uc007jiy.1,uc007jiz.1,uc007jja.1,uc007jjb.1,uc007jjc.1,uc007jjd.1:chr11:-:62130191:62271308:Ncor1:25:28-29-30	A3SS	E25,E28	E25,E26,E27,E28	-2.26539	-0.965959	1.29943	0.00386067	0.0234265	0.852884	0.611479	-0.241405
uc009gas.2,uc009gat.1,uc009gau.1,uc012fha.1,uc012fhb.1:chr7:+:29919951:29938974:Rasgrp4:15:18	IR	E15,E18	E15,E16,E17,E18	-1.74848	-3.53748	-1.789	0.00389968	0.0236445	0.621695	0.91764	0.295946
uc008bwu.1,uc008bwv.1,uc008bww.1:chr17:-:32527605:32540526:Rasal3:<2-4:6-8-10-12-13-14-15-16-17-18-19-20-21-22-23-24>	ES	E4,E6	E4,E5,E6	1.47055	0.76387	-0.706677	0.00390727	0.0236718	0.146125	0.317062	0.170937
uc007sxq.1,uc007sxr.1,uc007sxs.1:chr14:-:32291983:32308163:Mettl6:<1-2-3-4:7>	ES	E4,E7	E5,E7	-0.00173768	-1.71154	-1.7098	0.00393912	0.0238376	0.292934	0.74458	0.451646
uc008hmv.1,uc008hmw.1,uc008hmx.1,uc008hmy.1:chr19:-:42018196:42055626:Mms19::5	AFE	E1,E2,E3,E5	E4,E5	2.99631	1.63112	-1.36519	0.00394084	0.0238376	0.958436	0.825236	-0.1332
uc007uix.2:chr14:-:65670895:65716943:Extl3:<1:3-4-5-6-7>	ES	E1,E3	E1,E2,E3	-0.826348	-1.96363	-1.13728	0.00395394	0.0238792	0.626617	0.835688	0.209071
uc009toc.2,uc009tod.2:chrX:+:71516154:71518474:Rpl10::3-4-5-6-7-8>	AFE	E1,E3	E2,E3	2.77509	1.70058	-1.07451	0.00395135	0.0238792	0.0589705	0.16289	0.10392
uc008wav.2,uc008waw.2:chr4:-:153338557:153349190:Dffb:<1-2-3:	ALE	E3,E4	E3,E5,E6,E7,E8	-1.84624	-0.820876	1.02536	0.00396794	0.0239449	0.595858	0.815192	0.219334
uc007apz.1,uc007aqa.1,uc011wji.1,uc011wjj.1:chr1:-:36392574:36426026:4632411B12Rik,Kiaa1310:7-8-9-10-11-12-13-14-15-16-17-18:20-21-22-23-24-25-26>	ES	E18,E20	E18,E19,E20	0.917778	-0.0595188	-0.977297	0.00397497	0.0239634	0.233986	0.453676	0.21969
uc007tvo.1,uc007tvp.1,uc007tvq.1,uc007tvr.1:chr14:+:54873862:54888840:Abhd4::3-4	AFE	E1,E3	E2,E3	-0.64222	0.337222	0.979442	0.00397725	0.0239634	0.958743	0.892167	-0.066576
[truncated: 322 more rows]
