# Supplementary material for: Integrated analysis of a compendium of RNA-Seq datasets for splicing factors
Source: bioRxiv preprint, doi:10.1101/2020.03.24.006791, version 1 (2020-03-25)
Supplement: Table S7 [file 006791_file20.xlsx]

## Sheet: BAT
Table S7. DEGs in CIT.
symbol	log2-foldchange	p-value	q-value
Sorl1	4.21744	1.02624e-52	1.2356e-48
Lctl	-4.83769	7.09792e-50	4.27295e-46
Elovl3	7.01155	8.36389e-45	3.35671e-41
Dusp15	4.2316	4.82948e-33	1.45367e-29
Hacd2	2.77899	1.68312e-31	4.05296e-28
Sgk2	5.89575	3.6126e-31	7.24928e-28
Adcy10	4.06572	4.3914e-31	7.5532e-28
Arhgef37	5.6034	6.50352e-29	9.7878e-26
Cend1	5.25518	7.89667e-29	1.0564e-25
Slc25a34	5.6445	3.62768e-27	4.36773e-24
Hephl1	4.62388	7.8935e-27	8.6398e-24
2310069B03Rik	5.7513	1.06776e-25	1.07131e-22
Cdh23	-3.16309	1.12089e-24	1.03812e-21
Cyp2b10	3.73292	3.04928e-24	2.62238e-21
Mycl	-3.87359	9.01473e-24	7.23582e-21
Slc43a2	2.68382	9.74071e-24	7.32989e-21
Pigr	6.17503	1.27349e-23	9.01932e-21
Adam12	3.62716	2.3557e-23	1.5757e-20
Grik5	-3.02236	4.29674e-23	2.6897e-20
Pigq	2.58158	4.46794e-23	2.6897e-20
Sqle	2.41339	6.98707e-23	4.00592e-20
Acat3	-3.85806	1.61868e-22	8.85859e-20
Inca1	-2.03025	3.99597e-22	2.0918e-19
Dock8	3.08936	6.45424e-22	3.23788e-19
C1rl	2.46358	7.9252e-22	3.81677e-19
Cldn1	4.31147	1.05772e-20	4.89806e-18
Pfkp	2.59753	2.17859e-20	9.71488e-18
E2f2	3.07763	2.88265e-20	1.23954e-17
Cux1	2.4935	3.41696e-20	1.41863e-17
Lrrc8b	2.60092	1.29229e-19	5.1864e-17
Dtx4	2.08588	2.11203e-19	8.20284e-17
Smarcd1	2.91822	3.06212e-19	1.15212e-16
Snhg11	-4.66812	5.38927e-19	1.96627e-16
Chrna2	4.00875	8.87543e-19	3.14295e-16
Ttc28	2.7948	1.91488e-18	6.58717e-16
Cnnm2	2.78584	3.98116e-18	1.33148e-15
Ccnd1	2.63815	4.96665e-17	1.57364e-14
Tacr2	7.63651	4.90577e-17	1.57364e-14
Cpne5	10.1752	5.61488e-17	1.73341e-14
Tbc1d22b	1.81674	6.65148e-17	2.0021e-14
Kcnh6	10.9141	7.74467e-17	2.23506e-14
Vat1l	-3.11891	7.79671e-17	2.23506e-14
Sbk1	2.39672	1.53358e-16	4.29401e-14
Bdh1	4.56967	1.70449e-16	4.6641e-14
Adamtsl3	-2.38569	2.15695e-16	5.64557e-14
Stxbp6	-3.09386	2.1509e-16	5.64557e-14
Kcnb1	2.50327	4.18686e-16	1.07255e-13
Hcn2	4.71657	5.04892e-16	1.26644e-13
Arntl	2.84377	9.16412e-16	2.25175e-13
Fbxo36	-3.34221	9.48725e-16	2.28453e-13
Pla2g2e	5.40828	1.05076e-15	2.48062e-13
Mavs	2.01866	1.56099e-15	3.6143e-13
1700029J07Rik	-3.42347	1.99473e-15	4.53141e-13
Frrs1	2.55226	2.05642e-15	4.55417e-13
Wee1	-2.09791	2.08039e-15	4.55417e-13
Bcl6b	-2.75448	2.59874e-15	5.49013e-13
Paqr9	2.55902	2.59915e-15	5.49013e-13
Gm45552	-4.08109	3.13076e-15	6.49903e-13
Lmtk2	1.55803	5.46265e-15	1.11475e-12
Fah	2.64113	5.82237e-15	1.16836e-12
Mgll	1.90449	7.06368e-15	1.39421e-12
Dhrs9	4.45146	8.16169e-15	1.58495e-12
Gm15411	-2.82674	8.72031e-15	1.66655e-12
Fdft1	-1.90215	1.23484e-14	2.32305e-12
Tpcn2	2.38039	1.39257e-14	2.57946e-12
Lrrc8d	2.35272	1.54509e-14	2.81862e-12
Six5	-1.699	1.70391e-14	3.06196e-12
Ntrk3	-2.19494	1.91523e-14	3.39108e-12
Dhcr24	2.92757	2.24025e-14	3.90907e-12
Adap1	2.42211	2.37754e-14	4.08937e-12
Apmap	1.97015	2.88991e-14	4.90064e-12
Gk	3.27706	3.36305e-14	5.62377e-12
Nr4a3	-2.629	3.74192e-14	6.1716e-12
Fam64a	4.74287	3.95152e-14	6.42923e-12
Sytl1	-3.81971	4.24254e-14	6.81069e-12
Rad9b	-2.05799	4.71473e-14	7.46913e-12
Npnt	3.97262	5.72002e-14	8.94402e-12
Ctsz	3.25764	1.07582e-13	1.66062e-11
Got1	2.86677	1.20474e-13	1.83608e-11
Ptprf	2.09348	1.31307e-13	1.97617e-11
Cd247	-3.17076	1.47923e-13	2.19876e-11
2018-03-01	3.08432	1.51738e-13	2.22796e-11
Bmp8b	10.6889	1.53848e-13	2.23173e-11
Dpep1	1.74092	1.81833e-13	2.60627e-11
Gja1	1.99114	1.92471e-13	2.7263e-11
Abhd5	1.4846	2.02661e-13	2.83725e-11
Sult5a1	3.06426	2.35705e-13	3.26195e-11
Slc35g1	2.32361	2.85398e-13	3.90477e-11
Tbc1d20	1.8998	3.91937e-13	5.30216e-11
Mtor	2.46031	4.00163e-13	5.3533e-11
6330403L08Rik	-2.37475	4.3301e-13	5.72906e-11
Aqp1	-3.01695	7.34739e-13	9.61549e-11
Gpd1	2.81974	7.45124e-13	9.64655e-11
Adcy3	3.65388	7.63654e-13	9.78127e-11
Ccdc62	-2.26663	9.05681e-13	1.14783e-10
Akr1b8	1.47316	9.19556e-13	1.15328e-10
Slc6a6	1.72382	1.00154e-12	1.24315e-10
Col20a1	-2.03225	1.03992e-12	1.26471e-10
Scd2	2.08579	1.03708e-12	1.26471e-10
Pla2g16	-1.90281	1.2308e-12	1.48188e-10
Acsl5	3.58963	1.3931e-12	1.66068e-10
Elovl5	1.14414	1.4333e-12	1.69185e-10
Rab37	2.2128	1.53163e-12	1.79037e-10
Loxl1	4.12881	1.63358e-12	1.888e-10
Slc25a17	2.09883	1.64651e-12	1.888e-10
Acly	2.63307	1.95422e-12	2.2197e-10
Tiam1	1.94824	2.02085e-12	2.27392e-10
Esrrb	3.95278	2.04221e-12	2.27669e-10
1810037I17Rik	-2.00762	2.12653e-12	2.34894e-10
Zdhhc5	1.32226	2.27042e-12	2.48508e-10
Gm15241	4.52603	2.38613e-12	2.5882e-10
Bhlhe40	2.5919	2.74158e-12	2.9472e-10
4931406C07Rik	2.21275	3.04372e-12	3.24304e-10
Col28a1	-2.7591	3.1324e-12	3.30826e-10
Ivns1abp	-2.71742	3.86206e-12	4.0434e-10
Ergic1	1.8491	3.98934e-12	4.12574e-10
Phf24	-3.80376	4.00923e-12	4.12574e-10
Fhdc1	3.5001	4.17276e-12	4.22185e-10
Map2k6	-2.39287	4.16002e-12	4.22185e-10
Pafah2	1.96257	4.3805e-12	4.39511e-10
Pgd	2.72134	4.6917e-12	4.61108e-10
Ppp1r10	-1.77014	4.70914e-12	4.61108e-10
Syne2	-1.59789	4.73903e-12	4.61108e-10
Ubiad1	1.77739	4.74895e-12	4.61108e-10
Nr4a1	-2.53093	5.56294e-12	5.35823e-10
Casp7	-2.19962	5.63376e-12	5.38337e-10
Zcchc24	1.22192	5.96652e-12	5.65645e-10
Nnat	-2.46584	6.05071e-12	5.69145e-10
Plin2	2.02097	6.5391e-12	6.10316e-10
Ap1m1	1.79914	7.08826e-12	6.56482e-10
Impdh1	-2.94833	7.99183e-12	7.34516e-10
Cables1	2.85654	8.61746e-12	7.86017e-10
Ptk2b	1.99762	8.97054e-12	8.11784e-10
Upp1	3.16238	9.0348e-12	8.11784e-10
Gab2	2.19319	9.27799e-12	8.27459e-10
Chst11	2.08403	1.04138e-11	9.21929e-10
Prkce	1.46288	1.06062e-11	9.32103e-10
Rnf144a	1.38283	1.07803e-11	9.40543e-10
Acot11	3.6989	1.2272e-11	1.06299e-09
Nfyc	1.26679	1.23917e-11	1.06569e-09
Strip2	-2.73774	1.28292e-11	1.09549e-09
Mfsd4b1	2.60049	1.35135e-11	1.14579e-09
Gm5627	2.40886	1.43806e-11	1.20237e-09
Hsd17b7	2.4487	1.43223e-11	1.20237e-09
2610020H08Rik	-2.27456	1.5684e-11	1.30232e-09
Ldlr	1.49957	1.8333e-11	1.51184e-09
Immp2l	-2.24513	1.9174e-11	1.57044e-09
Cox15	1.54568	1.99622e-11	1.62395e-09
Rufy4	-2.26956	2.1507e-11	1.73788e-09
Klhdc10	1.51508	2.20415e-11	1.7692e-09
Pik3ip1	-1.64254	2.35203e-11	1.87539e-09
2018-09-09	2.06027	2.3786e-11	1.8841e-09
Abcc8	4.35609	2.53022e-11	1.9911e-09
4921536K21Rik	2.6653	2.72387e-11	2.11583e-09
Olfr1396	3.34823	2.70939e-11	2.11583e-09
Cyr61	-1.82713	3.48802e-11	2.69203e-09
Deptor	2.44994	4.34105e-11	3.32906e-09
Scn5a	-2.59327	5.9786e-11	4.55585e-09
Adrb2	-2.43704	6.03657e-11	4.57109e-09
Slc25a25	-2.02137	6.26739e-11	4.71621e-09
Ncoa1	1.92357	6.54839e-11	4.89706e-09
Npr3	2.25776	6.59451e-11	4.9011e-09
Fam53b	1.43283	7.7141e-11	5.66328e-09
Svep1	-2.2894	7.71318e-11	5.66328e-09
Lgr6	3.53784	8.42205e-11	6.14554e-09
Hk1	2.41981	8.60648e-11	6.24229e-09
Clcn2	-2.101	9.54959e-11	6.88485e-09
Sc5d	1.91426	1.0165e-10	7.28491e-09
Tmem41a	1.71367	1.09847e-10	7.82579e-09
Slc3a2	2.13946	1.25905e-10	8.91704e-09
Clptm1	1.5991	1.4771e-10	1.04002e-08
Prkag2	-1.18441	1.81952e-10	1.27367e-08
Arhgef19	4.06758	2.04111e-10	1.42052e-08
Prkab1	1.87259	2.08675e-10	1.44394e-08
AU040320	1.49671	2.11063e-10	1.45211e-08
Lamp1	1.52277	2.15016e-10	1.4709e-08
Lpin1	1.91242	2.18509e-10	1.48636e-08
Ddhd2	1.90034	2.36012e-10	1.5964e-08
Btg2	-2.06636	2.77671e-10	1.86768e-08
Gdf5	-2.59893	2.8786e-10	1.92547e-08
Letm1	2.59426	3.12464e-10	2.07849e-08
Atp6v0a2	1.66301	3.15956e-10	2.09017e-08
Abcg1	1.76571	3.2402e-10	2.12021e-08
Tmx4	1.95536	3.22373e-10	2.12021e-08
Per3	-1.55392	3.34611e-10	2.17769e-08
Tmem8	2.23721	3.40896e-10	2.20666e-08
Rpain	-1.52549	3.50392e-10	2.256e-08
Ttc25	4.01761	3.53316e-10	2.26273e-08
Perm1	2.89416	3.79385e-10	2.41682e-08
Rpa2	-1.75379	3.91886e-10	2.48332e-08
Dnhd1	-1.57167	4.41841e-10	2.77724e-08
Ephx2	1.3774	4.42881e-10	2.77724e-08
4930415O20Rik	5.34608	4.55399e-10	2.84094e-08
Calr3	-2.01953	4.73798e-10	2.94048e-08
Nacc1	1.60982	4.86526e-10	3.00398e-08
Vac14	1.70842	5.05791e-10	3.107e-08
B4galt5	1.64622	5.24647e-10	3.20647e-08
E130307A14Rik	-2.0361	5.96941e-10	3.62989e-08
Lrfn3	3.26368	6.03651e-10	3.65224e-08
Arfgef2	1.86648	7.23181e-10	4.35355e-08
Retsat	1.95135	7.33418e-10	4.39321e-08
Ltbp2	-1.48143	7.39372e-10	4.40695e-08
Arc	-3.21573	7.72618e-10	4.58243e-08
Gm16124	-2.35255	8.69303e-10	5.10727e-08
Rasd1	-2.61298	8.69593e-10	5.10727e-08
B430219N15Rik	2.24606	8.80738e-10	5.14761e-08
Atp2a2	1.64352	8.88916e-10	5.17031e-08
Trit1	-1.72431	9.58902e-10	5.55057e-08
Pde7b	2.82255	9.89673e-10	5.70127e-08
Sh2d4a	-2.3018	9.97588e-10	5.7195e-08
Zc3h6	-2.15557	1.04713e-09	5.9751e-08
H13	2.04131	1.05239e-09	5.97676e-08
Elovl6	1.76692	1.07249e-09	6.06233e-08
Mrpl37	1.25052	1.07793e-09	6.06459e-08
Tdrp	1.10315	1.17915e-09	6.60324e-08
Gng7	-2.1162	1.23507e-09	6.88435e-08
Iqsec1	1.72761	1.31278e-09	7.28382e-08
Pid1	-1.89153	1.32705e-09	7.3292e-08
Vwa8	2.05343	1.53536e-09	8.44098e-08
Gak	1.20674	1.58589e-09	8.67912e-08
Clec16a	1.79637	1.62615e-09	8.85919e-08
Art3	-1.84478	1.67168e-09	9.0662e-08
Slc44a3	-1.5077	1.70084e-09	9.18303e-08
Mical2	1.6396	1.8058e-09	9.70618e-08
Gfm1	2.21938	1.83905e-09	9.84097e-08
Traf3	1.10575	1.8552e-09	9.88345e-08
Acsm3	-3.0006	1.92198e-09	1.01895e-07
Trim80	5.32157	1.92957e-09	1.01895e-07
Gdap10	-3.38457	2.07074e-09	1.08872e-07
Blvra	-1.55377	2.08429e-09	1.09108e-07
Morc3	-1.70586	2.12849e-09	1.1094e-07
Arhgap35	1.62029	2.41537e-09	1.2535e-07
Egr3	-3.48117	2.45217e-09	1.26713e-07
St3gal5	3.14926	2.60745e-09	1.34161e-07
Acsf2	2.04419	2.92942e-09	1.50086e-07
Fam131c	4.14956	2.96815e-09	1.51426e-07
Zfyve26	1.27418	3.01395e-09	1.53114e-07
Sipa1l1	1.6967	3.22513e-09	1.63154e-07
Ttf2	1.50558	3.41117e-09	1.71843e-07
Haus4	-1.83129	3.65294e-09	1.83256e-07
Mettl21a	-1.78349	4.11485e-09	2.05572e-07
Ampd2	-1.92643	4.26642e-09	2.12263e-07
Hoxb3os	-1.78141	4.47046e-09	2.21499e-07
Lep	-2.69097	4.49765e-09	2.21933e-07
Ncan	2.80277	4.83922e-09	2.37813e-07
Fam65b	2.01363	5.26495e-09	2.57683e-07
Dag1	1.89774	5.34679e-09	2.60629e-07
N4bp2l1	-1.4241	5.62101e-09	2.72891e-07
C920006O11Rik	-1.83491	5.79526e-09	2.80221e-07
Gstt2	-2.15988	6.01179e-09	2.89528e-07
Btc	-2.59194	6.0434e-09	2.89611e-07
Sp3os	-3.13747	6.06163e-09	2.89611e-07
Gstt1	-2.23045	6.34091e-09	3.01757e-07
Slc41a2	2.77136	6.47551e-09	3.06949e-07
Gns	1.23214	6.61151e-09	3.10948e-07
Hic2	-1.61787	6.6054e-09	3.10948e-07
Golph3	1.49321	7.3498e-09	3.44325e-07
Gm10851	1.53051	7.82681e-09	3.65251e-07
Opa3	1.39304	7.88077e-09	3.66349e-07
Lrrc8a	-1.6981	8.30971e-09	3.84804e-07
Bpnt1	1.2612	8.5986e-09	3.96656e-07
Slc46a1	1.87406	1.10988e-08	5.10037e-07
Cars2	3.07816	1.14869e-08	5.25865e-07
Lgmn	1.45056	1.22395e-08	5.58196e-07
Egr1	-2.13502	1.31974e-08	5.99611e-07
Slc10a6	-2.85103	1.41062e-08	6.38491e-07
Car3	-2.2771	1.44425e-08	6.51267e-07
Lipa	2.10028	1.51704e-08	6.79002e-07
Slx1b	-1.26044	1.51395e-08	6.79002e-07
Ttpa	2.8983	1.62067e-08	7.22697e-07
Mtmr14	-1.7312	1.65629e-08	7.35855e-07
Caprin2	-2.50442	1.74495e-08	7.72397e-07
Map3k9	2.23571	1.86653e-08	8.23189e-07
Mybl2	-2.19188	1.88338e-08	8.27589e-07
Mrps2	1.92062	1.96282e-08	8.59358e-07
Irak2	1.05421	2.04391e-08	8.91617e-07
Dock9	-1.84087	2.0604e-08	8.95569e-07
Ckb	3.10845	2.08628e-08	9.03554e-07
Sfxn4	-1.61316	2.19411e-08	9.46847e-07
Fmo4	-2.09698	2.23563e-08	9.6132e-07
Dnajc12	-2.10213	2.36871e-08	1.01492e-06
Cbx7	-1.89191	2.45838e-08	1.04961e-06
Mtmr9	1.64628	2.48267e-08	1.05623e-06
Klf4	-1.86145	2.59382e-08	1.09963e-06
Uck2	1.74073	2.63761e-08	1.11428e-06
Airn	-2.43122	2.72206e-08	1.13746e-06
Dnajc11	1.79974	2.72625e-08	1.13746e-06
Hsd17b12	1.84081	2.73027e-08	1.13746e-06
Zmym3	-1.73653	2.71634e-08	1.13746e-06
Oscp1	-1.63378	2.77736e-08	1.15308e-06
Nsdhl	1.4765	2.79668e-08	1.15711e-06
Mfsd4b3	2.35932	3.00574e-08	1.23935e-06
Spred2	1.18286	3.0391e-08	1.24883e-06
Apol6	-1.63189	3.16543e-08	1.29632e-06
Acad11	1.49003	3.2008e-08	1.30636e-06
Fbf1	-1.36941	3.3558e-08	1.36499e-06
6530402F18Rik	1.58825	3.40155e-08	1.37438e-06
Hmgn2	-1.62845	3.40172e-08	1.37438e-06
Ucp1	3.46669	3.51507e-08	1.41543e-06
Ampd3	1.53347	3.81934e-08	1.53283e-06
Smyd4	1.62908	3.83979e-08	1.53591e-06
Myo1c	1.15593	3.90316e-08	1.5561e-06
Egln1	2.14238	4.02354e-08	1.59879e-06
Ipo9	1.32478	4.11715e-08	1.63061e-06
Tpp1	1.39705	4.30617e-08	1.69988e-06
Fam65c	-2.81068	4.33765e-08	1.70671e-06
Rfx2	1.90908	4.37143e-08	1.7144e-06
Gpx3	-2.5359	4.70349e-08	1.83864e-06
Tbc1d9	1.40632	4.81505e-08	1.87616e-06
Gpam	2.60488	5.023e-08	1.95087e-06
Kctd14	-2.53588	5.17128e-08	2.002e-06
Ablim3	-1.29976	5.42106e-08	2.09197e-06
Eci3	-2.69564	5.59633e-08	2.15271e-06
Gstm2	-1.46017	5.71192e-08	2.19018e-06
Msh2	-1.30111	5.80255e-08	2.21786e-06
Acox2	2.30236	5.89421e-08	2.24577e-06
Nuak2	-3.17368	6.27098e-08	2.38179e-06
Hist1h1c	2.13565	6.30538e-08	2.38732e-06
Lman2	1.62036	6.33789e-08	2.3921e-06
Noxo1	-2.10634	6.39444e-08	2.40591e-06
Klb	1.59166	6.42194e-08	2.40873e-06
Dync2h1	-2.51529	6.47943e-08	2.42274e-06
Trp53inp2	1.78938	6.54947e-08	2.44135e-06
Cpt2	1.80205	6.87125e-08	2.55339e-06
Cox10	1.87247	7.0352e-08	2.60627e-06
Ehhadh	1.48696	7.18841e-08	2.65486e-06
Fam193b	-1.46252	7.31888e-08	2.69478e-06
Snhg6	-2.10339	7.57433e-08	2.77188e-06
Fam219b	-1.52372	8.65658e-08	3.15834e-06
Ccdc138	2.20237	9.31262e-08	3.38743e-06
Orc6	-1.49684	9.40094e-08	3.40926e-06
Tesc	3.8522	1.0956e-07	3.96125e-06
Ankrd13a	1.04446	1.10675e-07	3.98959e-06
Txnl4a	-1.44786	1.12672e-07	4.04946e-06
Zfp956	-1.78149	1.24764e-07	4.47073e-06
Ubqln1	1.21502	1.26799e-07	4.53016e-06
Fndc5	2.25264	1.27759e-07	4.55093e-06
Dip2a	1.66	1.28461e-07	4.56244e-06
Grn	1.53725	1.32007e-07	4.67459e-06
Morc4	1.86311	1.39473e-07	4.9245e-06
Scarb2	1.38308	1.46477e-07	5.15669e-06
Exoc3	1.38561	1.4941e-07	5.22936e-06
Vps33a	1.34189	1.49173e-07	5.22936e-06
Fam129c	-2.15706	1.51689e-07	5.29372e-06
Gys2	2.59389	1.52581e-07	5.30946e-06
Gpi1	1.8838	1.55505e-07	5.39563e-06
Plekha4	-1.78305	1.65921e-07	5.74049e-06
Crat	1.52694	1.7189e-07	5.92995e-06
Znrf3	1.32772	1.80813e-07	6.21997e-06
Cyb5b	1.13079	1.87654e-07	6.43689e-06
Kcng4	3.26785	1.89924e-07	6.49625e-06
5031439G07Rik	1.65092	1.92251e-07	6.55724e-06
Insr	1.43578	1.98506e-07	6.75145e-06
A530020G20Rik	-2.62787	2.01129e-07	6.81828e-06
Tmed5	1.98697	2.01604e-07	6.81828e-06
Dcun1d3	-1.72306	2.02446e-07	6.82758e-06
Agbl3	-1.78764	2.04037e-07	6.83655e-06
Hccs	1.21016	2.03608e-07	6.83655e-06
Snrpg	-1.8181	2.04415e-07	6.83655e-06
Wdr7	1.20692	2.07571e-07	6.92288e-06
Car14	1.8599	2.08583e-07	6.9374e-06
Rbm47	1.77586	2.11358e-07	7.01034e-06
Derl1	1.86278	2.14634e-07	7.09944e-06
Cat	1.38188	2.15798e-07	7.11839e-06
5031434O11Rik	-1.47639	2.19346e-07	7.20102e-06
Rap1gap2	1.4062	2.195e-07	7.20102e-06
Letmd1	1.97825	2.21958e-07	7.26189e-06
Tmem8b	1.34626	2.22837e-07	7.27087e-06
Ttc3	-1.71031	2.27257e-07	7.39508e-06
4933439C10Rik	-1.73992	2.28522e-07	7.41618e-06
Alg3	1.72765	2.35751e-07	7.63023e-06
Lat2	-2.19235	2.39264e-07	7.72316e-06
Cluh	1.62617	2.42918e-07	7.82013e-06
Efs	-2.4114	2.45606e-07	7.88561e-06
Adam22	-2.67715	2.53898e-07	8.13013e-06
Nnmt	1.95935	2.55196e-07	8.15004e-06
Snhg4	-1.47646	2.56003e-07	8.15416e-06
Gmpr	3.43694	2.57546e-07	8.18169e-06
Scp2	1.06154	2.67001e-07	8.45971e-06
Hspa4l	1.97608	2.80861e-07	8.85226e-06
Tuba8	2.28941	2.80431e-07	8.85226e-06
Megf9	2.02521	2.83489e-07	8.91178e-06
Rflnb	1.26535	2.86147e-07	8.97191e-06
Tubb4b	1.77473	2.94574e-07	9.21214e-06
Lhpp	-1.10339	2.99256e-07	9.33431e-06
Pkn1	1.50477	3.01552e-07	9.38161e-06
Gm16062	3.14635	3.02924e-07	9.40003e-06
Atp4b	2.9493	3.09298e-07	9.57313e-06
Mast2	1.29018	3.11151e-07	9.6058e-06
H6pd	1.23158	3.15005e-07	9.69989e-06
Plaur	-2.40367	3.17707e-07	9.75814e-06
Slc25a22	1.48521	3.24912e-07	9.95403e-06
Mto1	1.34439	3.33499e-07	1.01912e-05
Tatdn2	1.22174	3.41097e-07	1.0397e-05
Dhrs7	2.00818	3.56843e-07	1.08495e-05
Pcca	1.68057	3.60628e-07	1.09369e-05
4430402I18Rik	-1.80478	3.72338e-07	1.12637e-05
Gramd1a	-1.43337	3.76142e-07	1.13502e-05
Dbt	1.89719	3.82571e-07	1.15154e-05
Irs3	-1.62434	3.87908e-07	1.16179e-05
Tbx6	-1.9568	3.8755e-07	1.16179e-05
Cks2	-1.70718	3.92732e-07	1.17042e-05
Tk2	-1.1979	3.92267e-07	1.17042e-05
2010003K11Rik	1.81377	3.96735e-07	1.17943e-05
Golgb1	-1.6082	4.14148e-07	1.22816e-05
Fahd2a	-1.60566	4.15208e-07	1.22828e-05
Lpgat1	1.54822	4.18968e-07	1.23636e-05
Pxmp2	-1.97015	4.20435e-07	1.23766e-05
Ptpn11	1.32628	4.22483e-07	1.24066e-05
Gpd2	1.66206	4.25366e-07	1.24608e-05
Nop56	-1.22098	4.34054e-07	1.26845e-05
D17Wsu92e	1.6225	4.37367e-07	1.27504e-05
Arhgap24	1.34868	4.39966e-07	1.27643e-05
Letm2	-1.42631	4.39908e-07	1.27643e-05
Hmgcs1	1.44093	4.50489e-07	1.29758e-05
Ppif	1.88063	4.49796e-07	1.29758e-05
Cpn2	2.25271	4.54585e-07	1.30625e-05
Cnst	1.39065	4.72664e-07	1.35497e-05
Arhgef12	1.46148	4.86093e-07	1.39016e-05
Trp53i11	-1.79345	4.89176e-07	1.39566e-05
Adgra3	1.18068	4.97286e-07	1.41544e-05
Nrbp2	-1.29203	4.98941e-07	1.4168e-05
Glul	1.59521	5.14079e-07	1.45319e-05
Gm12216	-1.79841	5.14168e-07	1.45319e-05
Stard5	1.47237	5.26303e-07	1.48276e-05
Uhrf1bp1	1.1886	5.27095e-07	1.48276e-05
Pygo1	-2.08337	5.351e-07	1.50177e-05
Setd4	-1.6458	5.52798e-07	1.54424e-05
Slc28a2	-1.89812	5.5183e-07	1.54424e-05
Tmem135	1.39255	5.58875e-07	1.55761e-05
Plekhg6	-1.85637	5.6036e-07	1.55814e-05
5430416O09Rik	-1.35047	5.70757e-07	1.58339e-05
Bcl2l13	1.36551	5.74119e-07	1.58906e-05
Nab2	-1.84718	6.06337e-07	1.67438e-05
Rom1	2.78315	6.31168e-07	1.73896e-05
Sat2	-1.56708	6.35871e-07	1.74749e-05
Tfap4	-1.84215	6.37165e-07	1.74749e-05
Ctso	-1.6624	6.61065e-07	1.80891e-05
Inhbb	-2.16814	6.64034e-07	1.81292e-05
Stk40	1.324	6.70521e-07	1.82236e-05
Trbc2	-2.17787	6.70335e-07	1.82236e-05
Ap1b1	1.61814	6.76958e-07	1.83572e-05
Dpp7	1.51105	6.93861e-07	1.87732e-05
Ogdh	1.92867	7.03478e-07	1.89908e-05
Ccdc134	-1.4684	7.17401e-07	1.93233e-05
Slc25a44	1.15371	7.26413e-07	1.95223e-05
Slc17a9	-2.41108	7.29685e-07	1.95666e-05
4933406C10Rik	-1.76582	7.52001e-07	2.01202e-05
Zfp91	1.76023	7.55901e-07	2.01797e-05
Mycbp2	-1.61049	7.58474e-07	2.02036e-05
Bcl7a	-1.17418	7.60812e-07	2.02211e-05
Egr2	-2.85525	7.74898e-07	2.046e-05
G6pdx	1.53844	7.71706e-07	2.046e-05
Pacsin2	1.18029	7.74235e-07	2.046e-05
Abhd15	1.84503	7.84364e-07	2.06646e-05
Tubb6	1.94619	7.96555e-07	2.094e-05
Pcnx	1.05607	8.58525e-07	2.25199e-05
Gchfr	2.92662	8.76707e-07	2.29469e-05
Cc2d2a	-2.01514	8.9186e-07	2.32516e-05
Zfp773	-2.54166	8.92214e-07	2.32516e-05
Hes1	-1.6901	9.57746e-07	2.47984e-05
Klhdc8b	-1.62734	9.5642e-07	2.47984e-05
Trip10	-1.21434	9.61847e-07	2.48512e-05
Plekhb1	-1.62197	9.69733e-07	2.50012e-05
Tmem159	-1.59049	9.81755e-07	2.52571e-05
Egln3	1.86832	1.01799e-06	2.60779e-05
Ephb2	2.36238	1.01694e-06	2.60779e-05
Ankrd40	1.2655	1.03455e-06	2.63897e-05
Ccdc88c	-1.67973	1.03449e-06	2.63897e-05
Szrd1	1.13794	1.06582e-06	2.71299e-05
Nupr1	-1.75724	1.08016e-06	2.74369e-05
Tnfrsf10b	-1.3813	1.11914e-06	2.83673e-05
Rmdn3	1.78377	1.12182e-06	2.83753e-05
Limd1	1.01787	1.18583e-06	2.99317e-05
Yars	1.18083	1.20442e-06	3.03374e-05
H2-Q4	-1.5274	1.20878e-06	3.03834e-05
Lpar2	-2.47658	1.22792e-06	3.08003e-05
Phf13	-1.2699	1.25082e-06	3.12536e-05
Tsc22d3	-1.58373	1.25118e-06	3.12536e-05
1810032O08Rik	-1.93461	1.27628e-06	3.18064e-05
Park2	-1.11485	1.2786e-06	3.18064e-05
Mlec	1.11002	1.29578e-06	3.21675e-05
Lsm8	-1.3832	1.30663e-06	3.23211e-05
Ppp1r9a	-1.70849	1.30734e-06	3.23211e-05
Csrnp2	-1.46093	1.31052e-06	3.23332e-05
Pgam1	1.89002	1.31737e-06	3.24359e-05
Dnaja3	1.68591	1.34247e-06	3.29864e-05
Apold1	-2.173	1.36597e-06	3.34273e-05
Nasp	-1.19535	1.36379e-06	3.34273e-05
Zkscan17	-1.13699	1.37004e-06	3.3459e-05
Uhrf1	-1.85506	1.38206e-06	3.36843e-05
Gm20634	1.84909	1.3976e-06	3.39942e-05
Ppard	1.65154	1.4019e-06	3.403e-05
Cd83	-2.40044	1.40589e-06	3.40581e-05
Zfp618	-1.90548	1.40987e-06	3.4086e-05
Tdrkh	-1.58615	1.45419e-06	3.50872e-05
Carmil1	1.61831	1.46806e-06	3.53509e-05
1600020E01Rik	-1.80846	1.49396e-06	3.58313e-05
Gtf2ird1	1.50849	1.49294e-06	3.58313e-05
Phospho1	2.87871	1.52916e-06	3.66027e-05
Rpl9	-2.10714	1.54836e-06	3.69887e-05
Psmb8	-1.95094	1.59045e-06	3.79189e-05
Snhg12	-1.91741	1.63575e-06	3.89218e-05
Tshz1	1.26926	1.65666e-06	3.93415e-05
Tmem25	-2.02196	1.67971e-06	3.98105e-05
Atf5	2.52025	1.68637e-06	3.98899e-05
Abca8a	-1.6276	1.70833e-06	4.033e-05
Dok2	-2.00764	1.71803e-06	4.04795e-05
Fitm2	1.1263	1.73073e-06	4.04856e-05
Slc16a7	-2.53516	1.73174e-06	4.04856e-05
Ssfa2	1.60587	1.73051e-06	4.04856e-05
Uba1	1.10321	1.73137e-06	4.04856e-05
Zmiz2	1.5083	1.73977e-06	4.05947e-05
Slmo2	1.62725	1.7556e-06	4.08059e-05
Tiam2	1.62355	1.7528e-06	4.08059e-05
Slc9a3r1	1.34182	1.79386e-06	4.16149e-05
Bcl3	2.01948	1.80381e-06	4.17651e-05
Naaa	-1.13684	1.82329e-06	4.21351e-05
Agpat2	1.72849	1.87202e-06	4.30958e-05
Hsd11b1	-1.4079	1.86982e-06	4.30958e-05
Acot1	3.05263	1.92173e-06	4.41557e-05
Brwd1	-1.20098	1.95369e-06	4.48046e-05
Rnaseh2a	-1.79334	1.95877e-06	4.48356e-05
Mdp1	-1.19844	1.96644e-06	4.49258e-05
Cluap1	-1.37442	1.97061e-06	4.49359e-05
Comt	1.64389	1.97487e-06	4.49479e-05
Prelp	1.3849	2.01912e-06	4.58684e-05
Cln8	1.14138	2.0479e-06	4.64345e-05
Irgq	1.05612	2.08962e-06	4.72026e-05
Kif3c	-1.13354	2.1077e-06	4.75219e-05
Nf2	1.1036	2.1126e-06	4.75434e-05
Eif3c	1.16507	2.12306e-06	4.76896e-05
Pspc1	-1.43089	2.12983e-06	4.77527e-05
Exosc8	-1.61497	2.1542e-06	4.82092e-05
Neurl4	1.14969	2.21091e-06	4.93866e-05
Atf6	1.57463	2.22503e-06	4.96099e-05
Ankef1	-1.9789	2.26513e-06	5.04107e-05
Gm42418	-2.34812	2.28614e-06	5.07356e-05
Thg1l	1.60538	2.28816e-06	5.07356e-05
Cpeb1	-1.84077	2.30201e-06	5.0949e-05
Chn1	-1.35851	2.32123e-06	5.12326e-05
Gfm2	1.17575	2.32334e-06	5.12326e-05
Eng	1.82773	2.32792e-06	5.12398e-05
Alpl	2.47323	2.36141e-06	5.15995e-05
Lonrf1	-1.50309	2.355e-06	5.15995e-05
Oxsm	1.41415	2.3496e-06	5.15995e-05
Lclat1	1.70106	2.39612e-06	5.22632e-05
Stk39	-1.45908	2.41691e-06	5.26212e-05
Usp10	1.10094	2.45295e-06	5.33096e-05
Rrnad1	-1.31357	2.48186e-06	5.38408e-05
Hnrnph3	-1.30029	2.51637e-06	5.44913e-05
Anxa8	-2.41277	2.59416e-06	5.60749e-05
Sars2	1.87213	2.60668e-06	5.62445e-05
Furin	1.88823	2.61524e-06	5.63282e-05
Msra	1.32471	2.62652e-06	5.64701e-05
Fam120aos	1.73039	2.63767e-06	5.66088e-05
Nploc4	1.11346	2.66162e-06	5.70212e-05
Pygl	1.91755	2.7075e-06	5.7901e-05
Il15	-1.49427	2.73149e-06	5.83105e-05
Ntrk2	1.70731	2.85167e-06	6.07683e-05
Mpdz	1.12774	2.88394e-06	6.13473e-05
Ppargc1a	2.335	2.9518e-06	6.25699e-05
Acsl1	1.51493	2.98027e-06	6.30623e-05
E430018J23Rik	-1.35261	3.00598e-06	6.33835e-05
Ncapd3	-1.53384	3.00503e-06	6.33835e-05
Lonp2	1.16572	3.0409e-06	6.40077e-05
9130019O22Rik	-1.2894	3.06422e-06	6.42739e-05
Hk2	1.79766	3.11181e-06	6.50576e-05
Ralgapb	1.15889	3.11239e-06	6.50576e-05
Tm6sf1	1.53689	3.19141e-06	6.65938e-05
Lman2l	1.0698	3.20964e-06	6.68582e-05
Rgs10	-1.81554	3.22333e-06	6.70274e-05
Impa2	2.46686	3.23831e-06	6.72229e-05
BC051226	-2.19534	3.26392e-06	6.76378e-05
Nudt19	1.23114	3.28658e-06	6.79904e-05
Pkm	2.10614	3.38811e-06	6.99707e-05
Cytip	-2.2144	3.424e-06	7.05907e-05
Samd4b	1.18888	3.57735e-06	7.36261e-05
Pdp2	1.29198	3.64209e-06	7.47033e-05
St3gal4	-1.49366	3.6375e-06	7.47033e-05
Plppr3	-2.02665	3.72854e-06	7.63462e-05
Pon1	-1.9546	4.01704e-06	8.2114e-05
2410002F23Rik	-1.33056	4.12542e-06	8.41429e-05
Eif4g3	1.3259	4.13027e-06	8.41429e-05
Gys1	1.32954	4.1527e-06	8.43145e-05
Rnf122	-1.67649	4.15122e-06	8.43145e-05
Pigt	1.39202	4.25749e-06	8.62967e-05
Ddhd1	-1.15959	4.3095e-06	8.71108e-05
Tmc4	-1.45058	4.31213e-06	8.71108e-05
Arhgef18	1.14247	4.46571e-06	8.99117e-05
Hspa1a	-4.3528	4.46501e-06	8.99117e-05
Mpzl3	1.90538	4.48792e-06	9.0208e-05
Trappc10	1.03011	4.55025e-06	9.13084e-05
Fbxo22	-1.12066	4.61064e-06	9.23661e-05
Lss	1.29468	4.68833e-06	9.37624e-05
Zfp385a	1.8468	4.69591e-06	9.37624e-05
Adam1a	-1.48352	4.7756e-06	9.50384e-05
Dhx32	1.02621	4.77432e-06	9.50384e-05
Tspan15	1.28572	4.79253e-06	9.52178e-05
Atxn1l	1.26261	4.81163e-06	9.54398e-05
Angpt1	-2.53636	4.82832e-06	9.56135e-05
Jarid2	-1.21642	4.84502e-06	9.57866e-05
Gm42688	-1.35305	4.87936e-06	9.62969e-05
Trak1	1.1655	4.88683e-06	9.62969e-05
Egflam	-1.54854	4.95985e-06	9.75762e-05
Efna1	-1.59544	4.98526e-06	9.7916e-05
Srp14	-1.29434	5.05642e-06	9.9152e-05
Acss1	1.94903	5.19935e-06	0.000101789
Hint3	-1.89571	5.34526e-06	0.000104475
Izumo4	-1.44651	5.47306e-06	0.000106627
Osbpl5	-1.05398	5.46659e-06	0.000106627
Chd3	1.36275	5.61743e-06	0.000109087
Ric3	1.84141	6.14622e-06	0.000118972
Aars	1.44377	6.30695e-06	0.000121887
Arid1b	1.06927	6.4456e-06	0.00012397
Mlst8	1.10245	6.48548e-06	0.000124538
Tmtc4	-1.90375	6.71767e-06	0.000128791
Mllt1	1.71638	6.72933e-06	0.000128809
Mmachc	1.78235	6.76722e-06	0.000129329
Nkain1	-2.17338	6.78627e-06	0.000129488
Dut	-1.17907	6.92652e-06	0.000131955
Pum1	1.0418	7.1467e-06	0.00013572
Wars	1.49709	7.13588e-06	0.00013572
Carf	-2.04576	7.40063e-06	0.000140321
Rnf185	1.07547	7.47348e-06	0.000141479
Alb	-3.57869	7.53688e-06	0.000142455
Bid	-1.60775	7.61844e-06	0.000143771
Hsd17b4	1.52379	7.75274e-06	0.000146077
Foxk2	1.08217	7.91124e-06	0.00014883
Abcd3	1.19829	7.93696e-06	0.000149081
Firre	-1.45986	8.15894e-06	0.000153012
Zfp747	-1.1986	8.17699e-06	0.000153112
Ccdc34	-1.81536	8.23094e-06	0.000153644
Sik3	1.4477	8.22606e-06	0.000153644
Vrk1	-1.10498	8.2732e-06	0.000154194
Hspa1b	-4.60939	8.31433e-06	0.000154482
Pfkl	2.45825	8.34755e-06	0.00015486
Peli2	1.13753	8.38169e-06	0.000155255
9430015G10Rik	-1.57757	8.43267e-06	0.000155959
Ndrg3	1.60444	8.46286e-06	0.000156277
Otop1	2.28081	8.75376e-06	0.000161155
Gm21962	2.02309	8.97297e-06	0.000164938
1700037H04Rik	2.29633	9.02773e-06	0.000165615
Slc25a39	1.84699	9.03728e-06	0.000165615
Crispld2	-1.25654	9.0753e-06	0.000166059
Hadha	1.89499	9.12894e-06	0.000166787
Khk	-1.68515	9.15557e-06	0.00016702
Fam168b	1.05995	9.26784e-06	0.000168812
Zfp692	-1.23782	9.31705e-06	0.000169452
Cep44	-1.20061	9.43393e-06	0.000171319
Lipt1	1.22538	9.55248e-06	0.000173211
Vangl1	1.03165	9.80851e-06	0.000177319
Lpcat3	1.10858	9.95141e-06	0.000179576
mt-Nd2	2.75714	9.96317e-06	0.000179576
Hcar1	-1.70798	1.00457e-05	0.000180524
Lrrc20	2.07548	1.0119e-05	0.000181569
Mob1b	1.87764	1.01949e-05	0.000182658
Ddb2	-1.69808	1.03598e-05	0.000185337
Qpctl	1.21312	1.04538e-05	0.000186741
Dph6	1.18883	1.04741e-05	0.000186828
Abtb2	2.00908	1.10978e-05	0.000197659
Plk3	-1.62133	1.12576e-05	0.00020017
Slc38a10	1.47287	1.1272e-05	0.00020017
Btd	1.04007	1.13208e-05	0.000200739
Spsb1	1.24944	1.13963e-05	0.000201782
Ppp1r3b	1.75905	1.16934e-05	0.000206436
Nrn1	-1.60442	1.18755e-05	0.000209343
Selenoi	1.16982	1.19208e-05	0.000209682
Wipf3	2.14347	1.19296e-05	0.000209682
Gm8113	-1.40492	1.19883e-05	0.0002101
Rpia	1.35692	1.1988e-05	0.0002101
Tulp4	1.14804	1.20684e-05	0.000211196
Tmsb4x	-1.60963	1.21914e-05	0.00021304
Tpcn1	1.29393	1.23166e-05	0.000214916
Il17re	-1.18234	1.23517e-05	0.000215216
Jun	-2.01327	1.25284e-05	0.000217867
Prpf8	1.13037	1.254e-05	0.000217867
Smoc2	-1.57163	1.26247e-05	0.000219022
Abhd17c	1.741	1.27682e-05	0.000220875
Mis18a	-1.75807	1.28007e-05	0.00022112
Tectb	2.74656	1.30067e-05	0.000224357
Zim1	-2.11953	1.3077e-05	0.000225246
Hyi	-2.15325	1.3156e-05	0.000225318
Kansl1l	-1.7875	1.31418e-05	0.000225318
Ntpcr	-1.52204	1.31349e-05	0.000225318
Xylt1	1.6774	1.31242e-05	0.000225318
Fam161a	-1.84591	1.32358e-05	0.000226362
Mfsd7a	-1.66131	1.34424e-05	0.00022892
Sfxn5	1.83996	1.37046e-05	0.000233056
Plxna2	1.07221	1.37455e-05	0.000233422
Agpat3	1.61753	1.38346e-05	0.000234604
Kif16b	1.64892	1.38883e-05	0.000235183
Rassf7	-2.06156	1.39574e-05	0.000236021
Dusp3	1.12738	1.41739e-05	0.000239346
H2-Q6	-1.64022	1.42205e-05	0.000239796
Leo1	1.53539	1.43279e-05	0.000241269
Pcyt2	1.90952	1.44149e-05	0.000242396
Acp5	1.57897	1.45725e-05	0.000244363
Atmin	1.06833	1.45719e-05	0.000244363
Tspan4	-2.35671	1.4799e-05	0.000247816
Gsk3a	1.29111	1.48931e-05	0.000248701
Nrep	-1.75236	1.48852e-05	0.000248701
Acot6	1.50569	1.49344e-05	0.000249044
B3glct	1.2409	1.57162e-05	0.000261357
Thoc6	1.51122	1.57152e-05	0.000261357
Flad1	1.26533	1.57738e-05	0.000261954
Cbfa2t3	1.43369	1.59104e-05	0.000263858
Sugct	-1.79073	1.61428e-05	0.000267344
H2-DMb1	-1.62621	1.64781e-05	0.000272522
Haus1	-1.76279	1.66186e-05	0.000274468
Pex19	1.06476	1.66607e-05	0.000274787
Gbf1	1.07436	1.67062e-05	0.000275162
1810011O10Rik	-1.24591	1.68326e-05	0.000276864
Gimap3	-1.74863	1.7089e-05	0.000280699
Actn4	1.3418	1.73025e-05	0.000283817
Rdm1	-1.79201	1.74463e-05	0.000285786
Mipol1	-1.75261	1.74704e-05	0.000285793
Ttc30b	1.13685	1.79289e-05	0.000292895
Jam2	-1.58382	1.81125e-05	0.000295493
Ahnak	-1.12564	1.84867e-05	0.000300784
Tcn2	1.12154	1.86107e-05	0.000302393
Sfi1	-1.20739	1.8649e-05	0.000302607
Fbxl2	2.04938	1.87052e-05	0.00030311
Rexo2	1.50459	1.8956e-05	0.000306761
Ndst1	1.41795	1.91072e-05	0.000308793
Mafb	-2.03568	1.93678e-05	0.000312166
Psmb9	-1.50527	1.93576e-05	0.000312166
Ntn1	1.16867	1.9585e-05	0.000314405
Tmem147os	-1.31169	1.95637e-05	0.000314405
Traf4	1.92879	1.96739e-05	0.00031541
Lrrc52	2.543	1.97286e-05	0.000315868
Mcm8	-1.56579	1.97802e-05	0.000316274
Cldn15	-1.50623	1.99028e-05	0.000317811
Cpm	1.38276	1.99702e-05	0.000318465
Mxd1	-1.44897	2.00177e-05	0.000318801
Acaca	1.27517	2.01474e-05	0.000320442
Gfra4	-2.00542	2.01816e-05	0.000320562
Eepd1	-1.22018	2.03107e-05	0.000322188
Cdc42ep3	-1.49572	2.03514e-05	0.000322409
C8g	-2.48922	2.05451e-05	0.00032505
Tuba1c	1.96317	2.05889e-05	0.000325315
Slc26a6	1.34227	2.08971e-05	0.000329753
Fbxl14	1.33385	2.10666e-05	0.000331992
Npc2	-1.06086	2.17253e-05	0.000341479
Relb	-1.55916	2.17017e-05	0.000341479
Iars	1.11336	2.18953e-05	0.000343702
Tmem141	-1.47248	2.20963e-05	0.000346405
Unc119	-1.72749	2.21664e-05	0.000347053
B430212C06Rik	1.31473	2.22886e-05	0.000348513
Jmjd7	-1.31955	2.29278e-05	0.000357579
C3	1.42634	2.3092e-05	0.000359674
Hilpda	-1.83608	2.33282e-05	0.000362223
Nedd4l	1.19494	2.33459e-05	0.000362223
Nabp1	1.43533	2.46486e-05	0.000381942
Snhg20	-1.25597	2.46814e-05	0.000381958
Ebpl	-1.7531	2.48595e-05	0.000383729
Scyl1	1.52589	2.48568e-05	0.000383729
Arhgdig	3.06361	2.48953e-05	0.000383789
Lsm10	-1.07076	2.49668e-05	0.0003844
Gm13375	-1.82572	2.5028e-05	0.00038485
Unc119b	1.49346	2.54043e-05	0.000390137
Aldh3b2	1.57733	2.54975e-05	0.000390992
Fam212b	-1.29612	2.55249e-05	0.000390992
Lrp11	1.45958	2.55927e-05	0.000391532
Tap1	-1.34411	2.57057e-05	0.000392763
Rptor	1.42231	2.61355e-05	0.000398823
Nr3c2	-1.31382	2.65525e-05	0.000404674
Arhgef40	-1.05282	2.66635e-05	0.000405852
Exd1	-1.16021	2.71925e-05	0.000413382
Mfn2	1.10319	2.75571e-05	0.000418395
Ccdc77	-1.69667	2.77238e-05	0.000420397
Mrap	1.32867	2.78467e-05	0.000421729
Gnmt	3.08514	2.83774e-05	0.000428687
Zfp871	-1.79281	2.89067e-05	0.000436136
Lmo1	-2.2432	2.95248e-05	0.000444904
Apol10b	-1.94317	2.96651e-05	0.000446459
Ptdss2	1.69299	2.99719e-05	0.000450514
Etv6	1.15517	3.00328e-05	0.000450866
Atg9b	1.29526	3.02259e-05	0.000453201
Esr1	-1.46048	3.0267e-05	0.000453252
Abracl	-1.20237	3.06351e-05	0.000458195
Dysf	1.28453	3.07527e-05	0.000459383
Map4k4	1.41445	3.14278e-05	0.000468885
E430025E21Rik	1.25134	3.26901e-05	0.000485126
Gpld1	-1.44704	3.27581e-05	0.000485126
Kcnk3	1.73819	3.26974e-05	0.000485126
Tra2a	-1.69416	3.27398e-05	0.000485126
Trim12a	-1.58114	3.2948e-05	0.000487199
Zfp330	-1.0745	3.2979e-05	0.000487199
Ctsd	1.23738	3.30956e-05	0.000488322
Ehbp1l1	1.15358	3.37673e-05	0.000497623
Papln	2.37475	3.38898e-05	0.000498818
Sec11c	-1.19404	3.39781e-05	0.000499507
Ptprcap	-2.19595	3.40208e-05	0.000499525
Zdhhc9	1.12713	3.41866e-05	0.000501347
Tesk1	1.38513	3.48546e-05	0.000510017
Wdr93	-1.16195	3.48625e-05	0.000510017
Ttc23	-1.02949	3.57981e-05	0.000523069
Timp4	-1.62702	3.59613e-05	0.000524817
Parvb	1.3946	3.6019e-05	0.000525023
Nipsnap1	1.51351	3.7099e-05	0.000540112
Fundc2	-1.6394	3.72037e-05	0.000540982
Acacb	1.4752	3.7406e-05	0.000543267
Dancr	-1.56183	3.77312e-05	0.00054733
Pcsk6	1.43259	3.77847e-05	0.000547446
Ldlrap1	1.34543	3.78802e-05	0.00054817
Kpna6	1.02551	3.79384e-05	0.000548353
Vamp4	-1.2485	3.80877e-05	0.000549852
Matk	-2.25597	3.85797e-05	0.000556287
Fam92a	-1.44193	3.86998e-05	0.000557351
Bmi1	1.46623	3.87873e-05	0.000557943
Garnl3	1.16801	3.90784e-05	0.000560917
Ophn1	-1.19737	3.90871e-05	0.000560917
Chd9	-1.11329	3.92245e-05	0.000562218
4930581F22Rik	-1.69173	3.98204e-05	0.000569305
Dlst	1.3477	3.98608e-05	0.000569305
Kank1	1.22814	4.00554e-05	0.000571406
Otud3	1.40602	4.05622e-05	0.000577951
Rasl12	-1.52079	4.0794e-05	0.000580567
Galnt16	-1.2269	4.10283e-05	0.000582524
Klf6	-1.71215	4.12106e-05	0.000584424
Txndc16	-1.56348	4.17508e-05	0.000591388
H2-T23	-1.56073	4.2693e-05	0.000604023
Cryl1	-1.37041	4.35231e-05	0.000615045
Gnao1	1.62933	4.36986e-05	0.0006168
Epb41l4aos	-2.08549	4.38368e-05	0.000618027
Gm45372	1.50486	4.46596e-05	0.000628156
Zbtb25	-1.15752	4.46379e-05	0.000628156
Tigar	1.47116	4.54543e-05	0.000638588
Sh2d3c	-1.62101	4.56023e-05	0.000639921
Klf2	-2.28895	4.65564e-05	0.000651789
Srsf7	-1.10713	4.6556e-05	0.000651789
Dtd1	-1.15241	4.72127e-05	0.000659445
Rnf10	1.52585	4.76052e-05	0.000664156
Myrip	1.16898	4.80084e-05	0.000669006
Tspyl2	-1.46191	4.84774e-05	0.000673982
Pdhx	1.24651	4.8857e-05	0.000677694
Hebp2	1.49786	4.96792e-05	0.000688305
Calr	1.16118	5.03354e-05	0.000696595
Sertad1	-1.90137	5.04294e-05	0.000697095
Cpt1a	1.04889	5.0987e-05	0.000703994
Ramp1	-2.03673	5.11062e-05	0.000704832
Snap47	1.21374	5.16602e-05	0.000710845
Pgap2	1.17421	5.25295e-05	0.000721981
Rnd2	1.77915	5.28662e-05	0.00072578
Dapk1	1.04669	5.3201e-05	0.000729545
Ptch2	2.5445	5.33058e-05	0.00073015
Dlg1	1.42608	5.42641e-05	0.000742432
Dio2	1.80153	5.45449e-05	0.000745426
Col4a2	1.75116	5.55362e-05	0.000758114
Slc25a46	1.55994	5.56071e-05	0.000758222
Tmem110	1.43781	5.57969e-05	0.000759949
Phf1	-1.36661	5.60344e-05	0.000762321
Ccl5	-2.12599	5.6353e-05	0.000765791
Zswim5	2.28617	5.64447e-05	0.000766171
Mettl7a1	-1.07231	5.67124e-05	0.000768938
Slc22a17	-1.62658	5.88826e-05	0.000796569
Wdr25	1.75097	5.97163e-05	0.00080694
Fasn	1.85765	5.99698e-05	0.000809458
Pld6	2.96443	6.02656e-05	0.00081254
Arl1	-1.07891	6.06626e-05	0.000816978
Aldh1a1	-1.45303	6.19213e-05	0.000832068
Fryl	-1.2499	6.22193e-05	0.000834772
Gars	1.15824	6.22612e-05	0.000834772
Dffb	-1.30738	6.2376e-05	0.00083538
Plgrkt	-1.38646	6.25052e-05	0.00083618
Mlycd	1.88862	6.26477e-05	0.000836712
Smarca4	1.14331	6.26839e-05	0.000836712
Srsf3	-1.22073	6.3498e-05	0.00084664
Purg	-1.07905	6.35856e-05	0.00084687
Prpsap1	-1.07646	6.41273e-05	0.000853141
Sult1a1	-1.62907	6.55602e-05	0.000871241
Per2	-1.38648	6.57032e-05	0.000872179
Ppp4r1l-ps	-1.22747	6.6272e-05	0.000878761
Tmem220	-1.04979	6.70136e-05	0.000887616
Med24	1.44297	6.72518e-05	0.000889793
Dbp	-1.41276	6.74605e-05	0.000890596
Slc25a32	1.49107	6.7772e-05	0.000893729
Gadd45b	-1.61427	6.78978e-05	0.000894408
Pola2	-1.38503	6.82987e-05	0.000898707
Kcnc3	1.91348	6.83775e-05	0.000898761
Mark1	1.48295	6.88678e-05	0.000904218
Thbs1	-1.93038	7.03509e-05	0.000921681
Isyna1	1.83756	7.05058e-05	0.000922706
Them4	1.37856	7.0607e-05	0.000923028
Slc7a6os	-1.01657	7.12617e-05	0.000930576
Hipk2	2.25942	7.17015e-05	0.000934292
Plxna1	1.14297	7.19202e-05	0.000936128
Lmnb2	-1.22222	7.2582e-05	0.000943722
Dnaaf5	1.05547	7.34517e-05	0.000952972
Acot2	1.73501	7.8643e-05	0.00101704
Snapc3	-1.41807	8.0969e-05	0.00104264
Xndc1	-1.14946	8.22983e-05	0.00105749
4632427E13Rik	-1.75127	8.25591e-05	0.00105971
Cxcr2	-1.89364	8.27136e-05	0.00106057
Plekhm2	1.18278	8.30014e-05	0.00106087
RP23-143B2.2	1.11178	8.29254e-05	0.00106087
Atf3	-1.77894	8.38459e-05	0.00107053
Asnsd1	-1.52818	8.44801e-05	0.00107634
Dpy19l1	1.12066	8.4679e-05	0.00107675
Otub1	1.08264	8.46916e-05	0.00107675
Tusc5	-1.17912	8.50695e-05	0.00108042
Jade1	1.03314	8.57851e-05	0.00108836
Nsun4	1.28406	8.6759e-05	0.0010984
Fgf1	1.33216	8.69625e-05	0.00109982
Rnf144b	-1.19994	8.7496e-05	0.00110541
Zcwpw1	-1.09851	8.77673e-05	0.00110767
Aspg	2.25762	8.88657e-05	0.00111919
Tbcel	1.01353	8.9775e-05	0.00112946
Zranb1	-1.28951	8.98767e-05	0.00112956
Acot4	1.36908	9.00796e-05	0.00113093
Amigo1	1.31998	9.05985e-05	0.00113507
Mtr	-1.05166	9.05473e-05	0.00113507
Psmc4	1.0492	9.10336e-05	0.00113934
Ccdc82	-1.51609	9.15044e-05	0.00114286
Lbr	-1.29409	9.14358e-05	0.00114286
Aoc2	-1.25451	9.24382e-05	0.00115094
Poli	-1.39473	9.24159e-05	0.00115094
Grk3	1.28475	9.39966e-05	0.00116913
Adipoq	-1.48246	9.42146e-05	0.00117063
Sgcb	1.04566	9.44104e-05	0.00117186
Gbe1	1.31342	9.4667e-05	0.00117367
Nudcd2	-1.09411	9.47512e-05	0.00117367
Gm6277	1.96523	9.6297e-05	0.00119159
Rnf44	1.19543	9.64709e-05	0.00119252
Lrrc51	-1.11729	9.6955e-05	0.00119727
Zfp862-ps	-1.13458	9.81806e-05	0.00121116
Ino80d	-1.16203	0.000101912	0.00125591
Gm15551	-1.50317	0.000102169	0.00125779
Eif4g1	1.06337	0.000102621	0.00126206
Tpst1	-1.10343	0.000103135	0.00126579
Catsper2	-1.24112	0.000103654	0.00127087
Ccdc91	1.37838	0.000103945	0.00127314
Msantd3	1.38693	0.000104544	0.00127918
Klf9	1.09657	0.000105387	0.00128688
Nceh1	1.30809	0.000105604	0.00128809
Cks1b	-1.3025	0.000107128	0.00130417
2810021J22Rik	1.35431	0.000109144	0.00132602
Brap	1.15346	0.000109456	0.00132734
Setbp1	1.3502	0.000109472	0.00132734
Hebp1	-1.10265	0.000110124	0.0013339
Lamb3	1.32135	0.000110986	0.00134298
Msantd2	-1.79593	0.000112053	0.00135454
Obfc1	-1.36421	0.000112676	0.00135933
Rps27rt	-2.38136	0.000114124	0.00137406
Atoh8	-1.83829	0.000114859	0.00138152
Rassf1	-1.51872	0.000115033	0.00138223
BC029214	-1.50235	0.000115286	0.0013826
Gaa	1.42931	0.000115564	0.00138446
Dixdc1	1.43455	0.000117955	0.00141031
Slc12a9	-1.77045	0.00011943	0.00142652
Plekhn1	-1.84585	0.000121046	0.0014444
Mapre3	1.54549	0.000121834	0.00145236
Ttll3	-1.46703	0.000122231	0.00145421
Stard9	-1.31268	0.000122402	0.0014548
Ccnl2	-1.05465	0.000123253	0.00146348
Extl1	1.30577	0.000123605	0.00146621
Ap2a2	1.03499	0.000123831	0.00146745
Xpnpep3	1.33654	0.000125229	0.00148256
Gm11127	-1.59022	0.00012574	0.00148715
Cep295	-1.56983	0.000126036	0.00148772
Tpbgl	1.37046	0.00012625	0.00148879
Cdkn2d	-1.04716	0.000126451	0.00148969
Zfp276	-1.1009	0.000127164	0.00149517
Gpr108	1.15333	0.000128884	0.00151096
Sema6a	-1.37576	0.000129439	0.001516
Tmem63b	1.27666	0.000129627	0.00151673
Nthl1	-1.9515	0.000131262	0.00153436
Wdtc1	1.42546	0.000131575	0.00153653
Gbp2	-1.43697	0.000131993	0.00153992
B3gntl1	-1.36142	0.000134299	0.0015653
Ccdc159	-1.02358	0.000135185	0.00157411
Patz1	-1.18603	0.000136525	0.00158664
Rabl3	1.53054	0.000137158	0.00159093
Acvr2b	-1.57091	0.000138192	0.00160137
Ddit4	-2.0857	0.000139205	0.00161059
Irf4	-1.45438	0.000139255	0.00161059
Atp6v1g2	-1.64961	0.000140828	0.0016264
Mapkapk2	1.2181	0.000140891	0.0016264
Txnrd1	1.15025	0.000142068	0.00163527
Cxcl10	-1.76756	0.000142338	0.00163602
Hivep2	-1.07373	0.000142404	0.00163602
Arrdc1	-1.48632	0.000143035	0.00163857
Map4k1	-1.93124	0.000142974	0.00163857
Pi16	1.13892	0.000142799	0.00163857
Itga11	1.60907	0.00014472	0.00165631
Slc40a1	1.50566	0.000145002	0.00165796
Cpq	-1.08958	0.000145825	0.0016642
Klhdc1	-1.24665	0.000145739	0.0016642
H2-Aa	-1.49818	0.000146096	0.00166572
Parp10	-1.25528	0.000148391	0.00169028
Pisd-ps1	-1.05956	0.000150232	0.00170802
Cyp2f2	1.77642	0.000150716	0.00170869
Prkdc	-1.37848	0.00015066	0.00170869
Slc35c1	1.02411	0.000151872	0.00172017
Rps4x	-1.39843	0.000152053	0.00172061
Slc19a1	1.58236	0.000152339	0.00172222
Esrrg	1.417	0.000152754	0.00172529
Lmbrd1	1.03046	0.000153153	0.00172818
Slc16a1	1.26521	0.000153933	0.00173535
Coasy	1.51175	0.000154703	0.0017424
Cyp2u1	1.35467	0.000156301	0.00175875
Prkd2	-1.21192	0.000157666	0.00177246
Tmem128	-1.04695	0.000158891	0.00178456
Atg9a	1.20344	0.000163858	0.00183399
Gmps	1.14726	0.000163901	0.00183399
Hp	-1.42365	0.00016694	0.00186625
Ctcflos	1.37461	0.000167975	0.00187609
Zbtb7b	1.30029	0.000169026	0.00188607
Zadh2	1.10608	0.000169488	0.00188948
Cit	1.58822	0.000170656	0.0018983
Pctp	1.00081	0.000170752	0.0018983
Fam102b	-1.72153	0.000172569	0.00191496
Parm1	1.50709	0.000177945	0.00196961
Usp42	-1.09121	0.000178728	0.00197602
Hpf1	-1.47042	0.000179541	0.00198318
Pdgfa	-1.48187	0.00018087	0.00199604
Cxcl9	-1.77615	0.000183898	0.00202204
Per1	-1.27619	0.000186997	0.00205237
Lgals4	-1.14044	0.000187466	0.00205564
Ctnna1	1.10004	0.000188155	0.00205757
Mplkip	-1.15544	0.000188112	0.00205757
Zfp609	1.11141	0.000188558	0.0020601
Gm31166	-1.57145	0.000189719	0.00206904
2610037D02Rik	-2.7695	0.000190066	0.00207095
Myh8	6.84242	0.000191396	0.00208355
Dna2	-1.39618	0.000191935	0.00208753
Kif20a	1.63766	0.000192981	0.00209513
Rspo4	4.36637	0.000192935	0.00209513
Olfml2a	1.35727	0.000194155	0.00210597
Galnt15	-1.09314	0.000195342	0.00211694
Psmb10	-1.60627	0.000195743	0.00211937
Hspa9	1.06965	0.000197682	0.00213845
Lamc3	2.10094	0.00019812	0.00214108
Pigo	1.15734	0.000198528	0.00214183
Gatsl3	-1.39654	0.000199779	0.00215339
Myo18a	1.14842	0.000200666	0.00216102
Eps8l1	-1.21133	0.000201834	0.00217166
mt-Nd1	1.9294	0.000204566	0.00219909
Rfc3	-1.01789	0.000205139	0.00220327
Tubg1	1.12437	0.000206451	0.00221539
Pard3	1.02982	0.00020682	0.00221738
Qtrtd1	-1.24532	0.000210397	0.00225371
Ehbp1	-1.09342	0.000211033	0.00225852
Acsm5	-1.51238	0.000213587	0.00228382
Slc1a5	-1.16464	0.000215709	0.00230447
Map3k6	-1.19532	0.000217194	0.00231828
Fzd7	1.13811	0.000220356	0.00234579
Cilp	2.5388	0.000221549	0.00235641
Hspa4	1.1417	0.000222856	0.00236821
Gprasp1	-1.19712	0.000223113	0.00236886
Blvrb	-1.66891	0.000223591	0.00237184
Nsf	1.0534	0.000224225	0.00237647
Acss3	1.35254	0.000224886	0.00238138
R3hdm2	1.13463	0.000226402	0.00239533
Ccdc157	-1.06171	0.000228189	0.00240866
Eefsec	1.28284	0.000228205	0.00240866
Epb41l4a	-1.389	0.000228262	0.00240866
Zfp423	1.27901	0.000228797	0.00241206
Zfp607a	-1.6375	0.000228986	0.00241206
Gna13	1.01225	0.000229661	0.00241706
Limch1	-1.68449	0.000231139	0.00243049
Btg1	-1.19703	0.000234713	0.00246377
Pcbp3	1.00372	0.000235081	0.00246548
Cnbd2	-1.21563	0.000237176	0.00248313
Slco4a1	1.60761	0.000237991	0.0024895
Irs2	-1.35218	0.000239733	0.00250554
Nkg7	-2.4819	0.000239967	0.00250582
Dleu2	-1.27261	0.000242258	0.00252535
Slc7a6	1.31221	0.000244706	0.00254866
Lynx1	1.2086	0.000247857	0.00257925
Sh3bgrl2	1.44199	0.000248461	0.0025829
RP23-128C4.4	1.61606	0.000249092	0.00258541
Crtac1	-1.87949	0.000250263	0.00259532
Lpl	1.17003	0.000250836	0.00259902
Nradd	1.3755	0.000252086	0.00260852
Tmem181b-ps	-1.21327	0.000252186	0.00260852
Atg16l2	-1.35437	0.000253074	0.00261463
Cenpa	-1.332	0.000253211	0.00261463
Adamts13	-1.86053	0.000253537	0.00261575
Sbsn	-1.69605	0.000257208	0.00264909
Sspn	-1.27798	0.000257598	0.00265083
Fbln5	1.074	0.000258754	0.00266046
Krtcap2	-1.2122	0.000261007	0.00268133
Lurap1	1.01235	0.000261572	0.00268484
Kdm8	1.14725	0.000262149	0.00268848
Etfdh	1.27005	0.000263466	0.00269739
Fn1	1.88654	0.000264314	0.00270377
Irf8	-1.33929	0.000268333	0.00273559
Hsd17b10	-1.06528	0.000269058	0.00274066
Poldip2	1.39971	0.000269821	0.00274611
Usp33	1.13699	0.00027438	0.00278263
Sertad3	-1.06778	0.000274977	0.00278446
Gm11266	-1.94207	0.000275584	0.00278827
Peli3	-1.36066	0.000276252	0.00279267
Pqlc3	-1.06414	0.00027695	0.00279738
Ly6d	1.65763	0.000280989	0.0028358
Fam210a	1.26232	0.000283585	0.00285721
Clasp1	1.00255	0.000284166	0.00286067
Ebf1	1.34242	0.000287056	0.00288734
Fam20c	-1.87033	0.000290077	0.00291044
Sec16b	-1.52411	0.000291551	0.00292279
Pithd1	-1.24965	0.000294617	0.00294862
Pdpr	1.54143	0.000295533	0.00295533
Slc2a5	1.33729	0.000298034	0.0029754
Trmt2a	-1.00009	0.000304477	0.00303218
Pawr	-1.2545	0.000305745	0.00303978
Rab27a	-1.41594	0.000306991	0.00304965
Msrb1	1.33997	0.000307632	0.00305098
Nudt17	-1.3398	0.000308687	0.00305893
Atp5s	-1.13923	0.000313023	0.0030968
Fads6	1.12362	0.000313666	0.00310061
Vrk2	-1.71832	0.000315973	0.00311829
Echdc2	-1.20369	0.000324181	0.00319406
Slc12a2	1.40343	0.000325386	0.00320331
Pop4	-1.02256	0.000326483	0.00321149
Cd3g	-2.07259	0.000330121	0.00324461
Lgals9	1.40846	0.000333114	0.0032687
Chpf2	-1.40542	0.000334507	0.00327703
Slc37a1	-1.26889	0.000334346	0.00327703
Gm32200	1.20563	0.000335858	0.00328759
Spred3	-1.58682	0.000336828	0.0032944
Rnf26	1.17959	0.000338393	0.00330691
Ttll12	1.20708	0.000338656	0.00330691
Tcta	-1.38343	0.000340578	0.00332029
AA986860	-1.38102	0.000341627	0.00332553
Ift43	-1.10705	0.000341668	0.00332553
Csgalnact1	-1.48103	0.000343308	0.00333879
Ulk1	1.16283	0.000344368	0.00334371
Zfp36l2	1.36401	0.000344191	0.00334371
Katnal2	-1.38561	0.000345832	0.00335521
Gm11131	-1.60235	0.000346198	0.00335606
Pla2g7	1.65798	0.000346853	0.00335971
Me1	1.38187	0.000349598	0.00338357
Inpp5a	1.01858	0.000350709	0.00339159
Kcna2	-1.32815	0.000351477	0.0033963
Trim12c	-1.40261	0.000353282	0.00341099
Trim67	1.21416	0.000353847	0.00341372
Smim10l1	1.13523	0.000355506	0.00342698
Spata17	1.34459	0.000358155	0.00344424
Rccd1	-1.02726	0.000358999	0.00344868
Uimc1	-1.06567	0.00035919	0.00344868
Sdc1	-1.06828	0.000360414	0.00345767
Rps8	-1.98602	0.000362422	0.00347141
Smim7	-1.04347	0.000363362	0.00347764
Dph1	1.27342	0.000364545	0.0034862
Col23a1	-1.15375	0.000369118	0.00352433
Col4a1	1.50702	0.000370927	0.00353879
A330035P11Rik	-1.65254	0.000372372	0.00354697
Mc2r	-2.0928	0.000372338	0.00354697
Fez2	1.00132	0.000373008	0.00355021
Nsun3	1.54334	0.000374455	0.00356116
9330159M07Rik	-1.30386	0.000375231	0.00356444
Mutyh	-1.37032	0.000375391	0.00356444
Ankrd33b	1.1643	0.000376171	0.00356903
Gamt	-1.36617	0.00037674	0.00357161
Ank	1.13312	0.000378633	0.00358674
Arrdc2	-1.20694	0.00038025	0.00359922
Hnmt	-1.8558	0.000385497	0.00364316
Slc50a1	-1.04926	0.000388493	0.00366859
Idnk	-1.17102	0.000389596	0.00367613
Nacc2	1.09483	0.000394234	0.00371697
Bsg	1.89262	0.000396634	0.00373376
Fam134b	-1.31673	0.000400649	0.00376566
Ptger4	-1.2814	0.000402768	0.00378263
Cep152	-1.13212	0.000405945	0.00380949
Svopl	-1.64118	0.000408041	0.00382618
Cep104	1.07696	0.000410182	0.00384028
Kmt2c	-1.36291	0.000412937	0.00386306
9130011E15Rik	1.0699	0.000414087	0.00386968
Gsto2	-1.33172	0.000414287	0.00386968
AB124611	-1.56872	0.000416477	0.00388712
Hmgb2	-1.17786	0.000420468	0.00392133
Mvd	1.609	0.00042322	0.00394394
Slc35a4	1.15275	0.000423627	0.00394468
Col11a2	-1.79394	0.000433982	0.00403165
Gm44386	-1.53858	0.00043386	0.00403165
Itpka	-1.69402	0.000435637	0.00403474
Mob3c	-1.11791	0.000435644	0.00403474
Lat	-1.71259	0.000437312	0.00404707
Rsph1	2.25326	0.000439454	0.00406065
Podn	-1.41953	0.000442449	0.00408206
Psme1	-1.13773	0.000443951	0.00409278
Gm12940	-1.82718	0.00044474	0.00409691
Hdac11	-1.39892	0.000445158	0.00409764
Gapdh	1.44652	0.000447544	0.00411389
Tmem64	1.11937	0.000447607	0.00411389
Abca7	1.08641	0.000451179	0.00413883
Ppm1l	1.23136	0.000451352	0.00413883
Mdm4	-1.79534	0.000452315	0.0041445
Nudt16l1	-1.25461	0.000453564	0.00415278
Gmnn	-1.30496	0.000455015	0.0041629
Erc1	1.19589	0.000458849	0.00418844
Gm21983	-1.48498	0.00045934	0.00418974
B130055M24Rik	-1.57394	0.000461085	0.00420247
Chtf18	-1.78993	0.000463161	0.0042182
Gpr153	-1.17548	0.000464142	0.00422394
Gm5069	1.77662	0.000466523	0.00423877
Ifi35	-1.41489	0.000467508	0.00424175
Glrx	1.14494	0.000472211	0.00427797
Cntfr	1.56263	0.00047363	0.00428472
Gas2l1	1.60908	0.000473668	0.00428472
Gm10638	2.90094	0.000474212	0.00428642
Hrct1	-1.14316	0.000475028	0.00429058
Mid1ip1	1.38911	0.000476788	0.00430324
Pgap3	1.27967	0.000478241	0.00431312
Lag3	-1.44783	0.000485092	0.00437164
Mcoln1	1.01398	0.000488468	0.00439877
Tmem94	1.304	0.000489323	0.00440318
Dhfr	-1.05627	0.000494249	0.00444418
Syp	1.25652	0.000496407	0.0044536
Pepd	1.10639	0.000499161	0.00447165
4930402H24Rik	1.06735	0.000503396	0.00450289
Piezo1	1.35887	0.000510179	0.00455341
Gnai1	1.2478	0.000517635	0.00461312
Trmt13	-1.1297	0.000517364	0.00461312
Clp1	-1.05879	0.000522879	0.00465641
Slc7a10	1.16739	0.000523493	0.00465843
Tgoln1	1.27495	0.000524326	0.0046624
Atp1a1	1.04611	0.000530158	0.00471078
Tap2	-1.25134	0.00053364	0.00473822
Jam3	-1.11762	0.000539296	0.00477787
Ptprd	1.17789	0.000541999	0.00479829
Skap1	-2.4721	0.000545092	0.00481858
Rabep2	-1.4747	0.00054792	0.00484003
Gm44597	-1.13267	0.000552737	0.00487186
Zhx2	1.08935	0.000553906	0.00487859
C1qa	-1.03193	0.000556025	0.00489367
Arl8b	1.02097	0.000561757	0.0049369
Chka	-1.04762	0.000564878	0.00495696
Tmem120a	1.14531	0.000570023	0.0049877
Nfkbiz	-1.256	0.000572578	0.00500642
Cdk2	-1.0267	0.00057368	0.00501242
Ms4a4b	-2.41328	0.000574103	0.00501247
Coa7	1.30296	0.000583855	0.00509023
Lox	1.13754	0.000586737	0.00511166
Grap	-1.21858	0.00060054	0.00521305
Spa17	-1.30841	0.000600052	0.00521305
Rnf11	1.07634	0.000604887	0.005247
Wfs1	1.39024	0.000605739	0.00525061
Tcea2	-1.47485	0.000611283	0.00529105
Kcmf1	1.15652	0.000616507	0.0053286
Zdhhc13	1.39884	0.000618184	0.00533162
Slc7a2	-1.28186	0.000620319	0.00533474
Zfp185	-1.516	0.000620076	0.00533474
Irak3	1.41805	0.000625556	0.00536677
Oxld1	-1.87126	0.000628448	0.00538542
Eln	1.42184	0.000631853	0.00541075
Rwdd3	-1.4872	0.000634034	0.00542556
Tnip2	-1.06756	0.000638531	0.00546016
Odc1	1.05749	0.000639973	0.00546473
Kbtbd3	-1.70241	0.000641761	0.00547224
Spaca6	-1.17405	0.000641333	0.00547224
Lppos	-1.24517	0.000647254	0.00551127
Pwwp2a	-1.43214	0.000647989	0.00551363
Lace1	1.17922	0.000650864	0.00553418
Srek1	-1.41444	0.000655661	0.00557104
Hmox2	1.22749	0.00066493	0.00564183
Cpne1	1.11068	0.000666765	0.00565342
Prdx2	-1.04967	0.000673585	0.00570723
Dcxr	-1.59602	0.000679237	0.00575106
Zfp36	-1.25313	0.000681643	0.00576738
Hcfc1	1.19693	0.000690428	0.00583351
Coq8a	-1.5405	0.000694684	0.00585714
Nenf	1.55597	0.000700579	0.00590271
Smad1	-1.17628	0.000702359	0.00591357
Paqr7	-1.67402	0.000703997	0.00592322
Tead3	-1.02736	0.000707304	0.00594274
Ldha	1.3679	0.000712144	0.00597923
Mad2l1	-1.26657	0.00072312	0.00606293
Lrp10	1.43279	0.000724085	0.00606537
Ucp3	1.00441	0.000724419	0.00606537
Errfi1	-1.70484	0.000733805	0.00613969
Neo1	1.00965	0.000734726	0.00614313
Cd14	-1.21535	0.000736008	0.00614958
Agpat1	1.3767	0.000748187	0.00622972
Mmab	1.07281	0.000749727	0.00623632
Tnfrsf21	-1.17476	0.000750016	0.00623632
Mta3	1.25887	0.000755893	0.00628085
Pdzrn3	1.28966	0.000759618	0.00630745
Tecpr1	1.59746	0.000765838	0.00634597
H2-Ab1	-1.18843	0.000771057	0.00638482
Nfkbia	-1.01775	0.000781776	0.00646468
Birc2	-1.36466	0.000787393	0.00650666
Apoe	-1.62364	0.000791897	0.00653491
Chst12	1.31976	0.000793326	0.00654011
Trnau1ap	-1.09377	0.000793613	0.00654011
Fancc	-1.12536	0.000799067	0.00656855
Lrtm1	-1.62666	0.000799792	0.00656855
Zscan2	-1.38791	0.000805879	0.00660952
Ldah	1.21673	0.000816344	0.0066744
Mgrn1	1.05244	0.000816561	0.0066744
Zmat1	-1.49245	0.000817535	0.00667783
Luc7l2	-1.18309	0.000821766	0.00670784
Dsn1	-1.3984	0.000824891	0.00672878
Lrp5	1.45604	0.000829857	0.00676014
Pdcd4	-1.22229	0.000835638	0.00680262
Fam105a	-1.697	0.000839647	0.00683064
Vamp5	-1.1688	0.000849336	0.00690014
Cep70	-1.62227	0.000850689	0.00690647
Alox12	1.1291	0.000869313	0.00703396
Ide	1.0942	0.000868968	0.00703396
Smim4	-1.46318	0.00087652	0.00708275
Eif4ebp2	1.92638	0.000877709	0.00708761
Slc25a20	1.32278	0.000883985	0.00712872
Zfp14	-1.35022	0.000902283	0.00727141
Plp1	-1.07086	0.000904301	0.0072828
Tada2b	1.12073	0.000906311	0.00728437
Adtrp	1.35568	0.000906995	0.00728501
Atxn2	1.39527	0.000910964	0.00731201
Dusp4	1.39914	0.000917539	0.00735987
Slc4a4	1.86397	0.000923855	0.00739423
Slamf9	-1.50504	0.000926741	0.00740409
Mgst3	-1.66172	0.000930259	0.00742727
Hey1	1.59244	0.000933614	0.00744911
Fam83a	-1.48	0.000942361	0.00751393
Sh2d2a	-2.1827	0.000945547	0.00753434
Siva1	-1.98056	0.00095006	0.00756529
mt-Nd4l	1.89888	0.000952897	0.00758287
Cchcr1	-1.22331	0.000953704	0.00758427
Twnk	1.01607	0.000956992	0.00760039
Zfp810	-1.23136	0.000959966	0.00761898
Otub2	1.14395	0.000961651	0.00762733
Fcho1	-1.63763	0.00096559	0.00764464
Epsti1	-1.37269	0.000966713	0.00764732
Wars2	1.09131	0.000969276	0.00766256
Tagap1	-1.12179	0.000974085	0.00769553
Gm26532	-1.30131	0.000986021	0.00777962
Prkcg	-1.26621	0.000985407	0.00777962
Pdss1	1.04926	0.000987949	0.00778973
Igfbp3	1.14328	0.000989115	0.00779381
Dnase1l2	-1.32905	0.000990336	0.00779833
Agmo	-1.85076	0.000995843	0.00783657
Rps27a	-1.42378	0.000996903	0.00783979
Xrcc3	1.04048	0.000997556	0.0078398
Plekhm3	1.12134	0.00100267	0.00786972
Tmem191c	-1.38002	0.00100263	0.00786972
Gm12840	1.73028	0.00100488	0.0078819
Tstd3	1.37149	0.00100981	0.00791026
Tspan13	-1.26038	0.00101646	0.00795722
Mapk12	-1.00708	0.00102637	0.00801915
Cd27	-2.38737	0.0010273	0.00802123
Dok3	-1.9148	0.0010378	0.00809796
Adm	-1.49225	0.00103879	0.0081004
Plekho2	-1.45841	0.00104635	0.00815405
Ak4	1.55766	0.00104993	0.00817666
Pex14	1.60742	0.00105364	0.00820024
3110040N11Rik	-1.19681	0.00105435	0.00820052
Zbtb48	-1.26095	0.00105805	0.00822393
Slit3	1.16936	0.00106324	0.00825367
Esyt1	-1.12652	0.00106954	0.00829159
Ube2v1	1.82721	0.00107019	0.00829159
Bysl	1.18023	0.00108266	0.0083613
Lrmp	-1.37869	0.0010813	0.0083613
C77080	1.18841	0.0010834	0.0083616
Extl2	-1.03044	0.00108459	0.00836547
Lrba	1.0238	0.00108902	0.00839422
Morf4l2	-1.19114	0.00109841	0.00846121
Fbxo44	1.47209	0.00110186	0.00847149
Srp9	-1.02419	0.00112538	0.00864679
Xrcc1	-1.1106	0.00113937	0.00874317
Kcnj11	2.4125	0.00114184	0.00875653
Ccdc80	-1.11803	0.00114781	0.00879109
Plxna3	-1.39083	0.00114731	0.00879109
Terf1	-1.2256	0.00115126	0.00881192
Fgl2	-1.31017	0.00115216	0.00881324
Tfrc	-1.81931	0.00116793	0.00892249
Spint2	-1.21303	0.00117153	0.00894434
Aacs	1.3613	0.00117967	0.00899505
Tbc1d10c	-1.50878	0.0011852	0.00903154
Snx10	1.27141	0.00119123	0.00905575
Gas5	-1.51365	0.00119248	0.00905631
Srsf11	-1.21638	0.00119297	0.00905631
Zscan12	-1.12667	0.0012	0.009104
Adal	1.06199	0.00120332	0.00912342
Nr1d1	1.2845	0.00120769	0.00914502
Cep83os	-1.15185	0.00122406	0.00925734
Psme2	-1.31787	0.00123769	0.00934281
Mrpl47	1.1599	0.00124495	0.00938587
Trib1	1.26181	0.00124935	0.00940135
Hsp90ab1	1.01344	0.00126075	0.0094694
Akip1	-1.21563	0.00126451	0.00949174
Adcyap1r1	-1.3115	0.00127031	0.00952338
Phldb1	-1.18918	0.00127686	0.00956653
Ntng2	1.26345	0.00127922	0.0095782
Fam26f	-1.65964	0.00128189	0.00959224
Dnase1l1	-1.33939	0.00128983	0.00964569
Ffar4	1.80823	0.00129685	0.00969216
2610016A17Rik	-1.11331	0.00130427	0.00973551
Aamdc	-1.21735	0.00130904	0.0097651
Cd52	-1.41323	0.00131772	0.00979949
Dusp18	1.06617	0.00131772	0.00979949
Odf2l	-1.14992	0.00131683	0.00979949
Bcl7c	-1.60392	0.00132148	0.00981531
Erlin1	-1.20572	0.00132488	0.00982238
Rbm3	-1.55161	0.00132682	0.00983069
Idh3a	1.20072	0.00133023	0.00984993
Fbxl12	-1.07783	0.00135275	0.0099737
Pstpip1	-1.224	0.00135216	0.0099737
S100a10	-1.02744	0.00136594	0.0100587
Hmgn1	-1.39316	0.00137533	0.0101216
Zfp367	-1.1873	0.00138526	0.0101772
Tmem69	1.21075	0.00139144	0.010209
A330023F24Rik	-1.50678	0.00140468	0.0102873
Ubxn11	-1.65074	0.00141222	0.010324
Wfdc21	1.52571	0.00141226	0.010324
2810474O19Rik	-1.40221	0.00141528	0.0103398
Rbm39	-1.06302	0.00142209	0.0103769
Oxa1l	1.05489	0.00142564	0.0103965
Bok	-1.97301	0.00143029	0.0104178
Cklf	-1.39447	0.00142969	0.0104178
Dynlt1c	-1.16353	0.00143187	0.0104231
Iqcb1	-1.08044	0.0014439	0.0104979
Nsun6	-1.116	0.00145653	0.010577
Gm12002	-1.36015	0.00146039	0.0105986
Tmem131	1.06482	0.00147049	0.0106463
Pdk2	1.24375	0.00147975	0.0107069
St6galnac2	-1.0218	0.00148537	0.0107346
Slc6a19	1.34345	0.00148657	0.0107369
Col6a6	-1.34151	0.00148995	0.0107484
Slc25a47	-2.00847	0.00148915	0.0107484
Prss36	-1.13417	0.00149399	0.010771
Fam160a1	1.18166	0.00150709	0.010846
Dhtkd1	-1.1918	0.00151767	0.0109091
Adamtsl5	1.26709	0.00152295	0.0109405
Ndufaf4	1.25177	0.00153071	0.0109831
AU020206	-1.28544	0.00153277	0.0109914
Mmp11	-1.15468	0.00154133	0.0110462
Gm10644	-1.10605	0.00155347	0.01112
Rdh13	1.03496	0.00156859	0.0112148
Selenoh	-2.34262	0.00157224	0.0112343
Phgdh	-1.35471	0.00157816	0.0112699
Ppp5c	1.03295	0.00158367	0.0112959
Rpl23	-1.43979	0.00160792	0.011462
Mstn	-1.91557	0.00164131	0.0116724
Gm45051	-1.7549	0.00165277	0.0117469
Arl4d	-1.69638	0.00165785	0.0117761
Dvl2	-1.00047	0.00166526	0.0118218
Mcee	1.13436	0.00166827	0.0118362
St6galnac5	-1.44019	0.00167071	0.0118434
Pgs1	1.06237	0.00167745	0.0118803
Slc35b2	-1.11067	0.00169608	0.011984
Ifit1	-1.29904	0.00169796	0.0119903
Hace1	-1.05197	0.00169924	0.0119923
Fabp3	1.79445	0.00170228	0.0119997
Comtd1	1.94726	0.00170954	0.0120438
Tmem261	-1.11863	0.00171246	0.0120573
Gm340	1.42276	0.00171349	0.0120576
Slc25a48	1.84492	0.00171875	0.0120875
Bscl2	1.20124	0.00172559	0.0121214
Carmil2	-1.34575	0.00172518	0.0121214
Nufip2	-1.02588	0.0017276	0.0121285
Zfp369	-1.37471	0.00174544	0.0122323
Rps9	-1.25653	0.00176305	0.0123414
Ankrd12	-1.40493	0.00178083	0.0124585
Hexdc	-1.25216	0.00179035	0.0125179
2310040G24Rik	-1.88423	0.0017957	0.012548
Lamtor1	1.07872	0.00179676	0.0125481
Zfp945	-1.25973	0.0018108	0.0126315
Polr3h	-1.05169	0.0018142	0.012648
Fbxw5	1.00801	0.0018204	0.0126838
Slc25a51	1.01302	0.00183741	0.0127875
Ccl21a	-1.36204	0.00184127	0.012796
Mrps18c	-1.05358	0.00184054	0.012796
S100b	1.17752	0.00184181	0.012796
Shtn1	1.27633	0.00184638	0.0128198
B430010I23Rik	1.37543	0.00184967	0.0128283
Nfia	1.05058	0.00186524	0.0129195
Acap1	-1.30604	0.00188089	0.013
Kank3	-1.11387	0.0019127	0.0131971
Tes	-1.1725	0.00191252	0.0131971
Unc13d	-1.60763	0.00192297	0.0132603
Pigb	1.09271	0.00192968	0.0132914
Il16	-1.29113	0.00193796	0.0133295
Spsb2	-1.10523	0.00193661	0.0133295
Cbx3	-1.4944	0.00194648	0.0133689
Ssh3	-1.0046	0.00194803	0.0133719
Gng5	-1.01648	0.00195646	0.0134145
Wsb1	-1.52372	0.00197432	0.0135292
Arsg	-1.23169	0.00197932	0.0135443
Mllt11	-1.08368	0.00197797	0.0135443
Ttc38	1.20845	0.00198049	0.0135443
Gmip	-1.10718	0.00203088	0.0138537
Apol7c	-2.64	0.00206063	0.0140169
Hes6	-1.09095	0.00206002	0.0140169
Fsd2	-1.49324	0.00207045	0.0140758
Ly6c2	-1.51501	0.00207976	0.0141231
2810405F17Rik	-1.04786	0.00208345	0.0141351
Ackr3	1.35385	0.00208429	0.0141351
Casp12	-1.32347	0.00208504	0.0141351
Sympk	1.41298	0.00208714	0.0141413
Aatk	1.70577	0.00210469	0.0142282
Bbs7	1.03617	0.00210328	0.0142282
Lpcat2	-1.88581	0.00210356	0.0142282
Rem1	-1.27945	0.00210786	0.0142337
Prps1	-1.06992	0.00211191	0.014245
Recql4	-1.36356	0.00211685	0.0142624
Rilp	1.15609	0.00211572	0.0142624
Pim3	-1.3443	0.00212894	0.0143198
Sod3	1.33332	0.00212746	0.0143198
Pla2g12a	1.52411	0.00213637	0.0143617
Khdrbs3	1.0511	0.00214061	0.0143701
Ubn2	-1.18938	0.00213895	0.0143701
Fcor	-1.30963	0.00214546	0.0143907
2410006H16Rik	-2.22896	0.00217743	0.0145646
Zrsr1	-1.44317	0.00218249	0.0145904
Prkcsh	1.11906	0.00219838	0.0146802
Cdr2	-1.00723	0.00220009	0.0146835
Chd6	-1.01325	0.00220179	0.0146867
Usp11	-1.34935	0.00221402	0.0147519
Mum1	-1.06755	0.00222461	0.0148143
Steap4	-1.20675	0.00223872	0.0148836
Map7	1.06957	0.00226522	0.0150348
Timp3	-1.03113	0.00226757	0.0150379
Nat8l	1.15744	0.00229869	0.0152151
Gbp3	-1.07706	0.00230671	0.0152597
BC025920	1.07731	0.00232797	0.0153739
Cep97	-1.11413	0.00232898	0.0153739
Cmpk1	1.09238	0.00233272	0.0153895
Slc35f6	1.1672	0.00234821	0.0154748
Ptpn7	-1.30948	0.0023504	0.0154807
Adat3	-1.83864	0.00236736	0.0155584
Trpv4	1.0264	0.00236609	0.0155584
Mrpl20	1.56808	0.00238135	0.0156296
Papd5	1.08349	0.00238208	0.0156296
Abhd14b	-1.08272	0.00240084	0.0157441
Arhgap5	1.50101	0.00241968	0.015859
Stmn2	1.1651	0.00245513	0.0160739
Dynll2	1.1338	0.00246401	0.0161232
Dennd4a	1.06419	0.00247195	0.0161664
Il10ra	-1.39067	0.00248239	0.0162258
Ktn1	-1.13603	0.00249691	0.0163031
N4bp3	-1.33767	0.00251017	0.0163688
Zc3h12a	-1.0029	0.00251249	0.0163692
Ap3m2	-1.14571	0.002541	0.0165371
Wdr86	-1.46945	0.00254536	0.0165565
Oard1	-1.17831	0.00258418	0.0167728
Mdk	-1.2918	0.00259079	0.0167886
Cyb5rl	1.01984	0.00261381	0.0169195
Proser2	1.65719	0.0026177	0.0169356
Med16	1.41666	0.00262739	0.0169892
Chchd1	-1.0102	0.00263131	0.0170046
Fam234a	1.05416	0.00263722	0.0170161
1700040L02Rik	1.68128	0.00264295	0.017035
Snhg17	-1.04919	0.00264297	0.017035
Aig1	1.14387	0.00264553	0.0170424
Arhgap4	-1.26728	0.00265833	0.0170974
Col27a1	-1.11346	0.00267465	0.017184
Marcksl1	-1.03064	0.00269093	0.0172702
Gm9885	-1.9972	0.00273338	0.0175332
Ints6l	-1.26619	0.00273984	0.017556
Nudt1	1.0546	0.00273974	0.017556
Igsf21	2.07394	0.00275408	0.0176284
B3galnt1	-1.15871	0.00276147	0.017657
Lck	-1.32639	0.00276444	0.0176666
Ank2	1.00647	0.00277502	0.0177248
Pex16	1.3918	0.00278004	0.0177474
Fdps	1.18199	0.00278645	0.0177695
Slc38a6	-1.32106	0.00279526	0.0178163
Efr3a	1.02286	0.00282483	0.0179648
8430408G22Rik	-1.24985	0.00283109	0.0179875
Taco1	1.42966	0.00283738	0.0180179
Lyst	-1.06757	0.00285836	0.0181225
Cyth4	-1.01697	0.00286131	0.0181316
Ppil3	-1.01031	0.00286691	0.0181467
Zap70	-1.52888	0.00286529	0.0181467
Rbm12b2	-1.56515	0.00288	0.0182118
Kcnh2	1.17014	0.00288839	0.0182552
Xrcc6bp1	-1.01421	0.00289612	0.0182945
5031425E22Rik	-1.06299	0.00292029	0.0183989
Chdh	1.19078	0.0029341	0.0184596
Gm45187	1.0701	0.00293724	0.018467
Cyp2j9	-1.11278	0.00300779	0.0188515
Wdr90	-1.17089	0.00302566	0.0189438
2610306M01Rik	-1.15829	0.00303709	0.0189956
Eri2	-1.1647	0.00311293	0.0193894
Fos	-1.4363	0.00311273	0.0193894
Cdyl2	-1.13624	0.00312776	0.0194415
Cdsn	-1.57252	0.00313028	0.0194471
Fnbp4	-1.16564	0.00317336	0.0196652
Ctcfl	-1.18947	0.00317837	0.019685
0610040B10Rik	-1.37316	0.0031834	0.0197019
Adat2	1.38161	0.00318602	0.0197019
Csf2ra	-1.37188	0.00318451	0.0197019
Hnrnph1	-1.15344	0.0032093	0.0198153
Atp1b1	1.20571	0.00322276	0.0198202
Immt	1.00897	0.00322205	0.0198202
2018-03-03	1.13479	0.00322326	0.0198202
Atp13a3	1.16077	0.00322659	0.0198306
Rps27l	-1.18356	0.00324427	0.0198885
Angptl4	-1.11226	0.00325352	0.019929
9430037G07Rik	-1.39349	0.0032669	0.0199865
Zfp263	-1.05798	0.0033233	0.0202903
Mob3a	-1.03262	0.00336854	0.0205249
Abca8b	-1.19319	0.00338569	0.0206085
Psap	1.01075	0.00339091	0.0206091
Serpina3g	-1.8099	0.00339061	0.0206091
F730311O21Rik	-1.74443	0.00339462	0.0206212
Gm16973	-1.37746	0.00341064	0.0206976
Ccdc125	1.28065	0.00344092	0.0208709
1110018N20Rik	-1.07171	0.00346688	0.020986
Tspan17	-1.13084	0.00347871	0.0210471
Clstn3	1.63967	0.00348244	0.021059
2610035D17Rik	-1.14529	0.00350133	0.0211221
Lix1	-1.41471	0.00351838	0.0212018
Olfr1388	-1.06663	0.00354876	0.0213529
Abi3	1.22435	0.0035641	0.0214237
Rhot2	1.21797	0.00363799	0.0218352
Enpp2	-1.37134	0.00366807	0.0220047
Ints6	-1.21645	0.00367907	0.0220598
Atp1a2	1.09701	0.00369045	0.0220989
Gnas	1.22893	0.00370492	0.0221376
Cidec	1.07119	0.00371268	0.0221637
Gm17491	-1.38542	0.00372858	0.0222348
Tmem88b	1.144	0.00374317	0.0223107
Zfp182	-1.50249	0.00377566	0.0224822
BC028528	1.75232	0.00377923	0.0224923
Il34	-1.28791	0.00378228	0.0224993
Rpl22	-1.30946	0.00381665	0.0226478
Ahsa1	1.07801	0.00383762	0.0227436
Arhgap22	-1.25742	0.00384115	0.0227484
Slc22a4	-1.10915	0.00385126	0.022797
Alms1	-1.50434	0.00385653	0.0228058
Atg4d	1.29126	0.00385596	0.0228058
Tspo	-1.92723	0.00391628	0.0231024
Ccdc85a	-1.16873	0.00393314	0.0231791
Plppr2	-1.59874	0.00393296	0.0231791
Cd28	-2.17717	0.00395434	0.0232724
D330041H03Rik	-1.20435	0.00398924	0.0234523
Gm2415	-1.14054	0.00401564	0.0235486
Hint2	-1.25996	0.00403002	0.0236114
Rps19	-1.02066	0.00404849	0.023685
Supt3	-1.07256	0.00405717	0.0237192
Mrpl33	-1.31006	0.00406493	0.0237351
Chrd	-1.12136	0.004078	0.0237768
Fam63b	1.10977	0.00409776	0.0238689
4732491K20Rik	1.11156	0.00412316	0.0239589
Nrros	-1.06	0.00412687	0.0239689
Zdhhc7	1.09906	0.00415266	0.0241071
Hotairm1	-1.63105	0.00417272	0.0241885
Mrs2	1.02041	0.00421296	0.0243866
Hmgb1	-1.06263	0.00422281	0.0244201
H2-DMa	-1.2386	0.0042288	0.0244313
Mypop	1.73921	0.00422865	0.0244313
Ap4s1	-1.16566	0.00427613	0.0246573
Rasl2-9	1.24036	0.00432162	0.0248601
Svbp	-1.16862	0.00435311	0.0250174
2310001H17Rik	-1.2739	0.00437145	0.0250693
Arid5a	-1.04326	0.00436955	0.0250693
Lockd	-1.27773	0.00437554	0.0250693
Klhl17	-1.17172	0.00438711	0.0251049
Fkbp7	-1.08319	0.0043944	0.0251347
Fibin	1.14104	0.00445337	0.0254237
Ankrd9	1.80825	0.00448347	0.0255592
Rnmt	-1.02977	0.00448917	0.0255767
Tfr2	1.91194	0.00449717	0.0255767
Tmem253	1.2102	0.00449657	0.0255767
Gm14403	1.46612	0.00450828	0.0256278
Stoml1	-1.16811	0.00451196	0.0256366
Cys1	-1.29293	0.00456306	0.0258903
Rangrf	-1.25283	0.00459541	0.0260003
Wdr89	-1.64577	0.0045954	0.0260003
Cdh19	-1.58908	0.00461607	0.026105
Suv39h1	-1.08095	0.00462049	0.0261177
Med4	-1.17085	0.00464021	0.0262037
Ddt	1.29545	0.0046727	0.0263263
Zswim4	1.0064	0.0047166	0.0265364
Plau	-1.09891	0.00472974	0.0265855
Ctf1	-1.20726	0.00476119	0.0267498
Polrmt	1.3926	0.0047904	0.0268637
Ces1f	-1.11995	0.00479656	0.0268858
Trpt1	-1.36296	0.00493402	0.0275154
H2-Q7	-1.31942	0.00496249	0.0276613
Tmem266	1.58353	0.00497025	0.0276789
Coro1a	-1.37094	0.00498286	0.0277235
Hltf	-1.41755	0.00498592	0.0277277
Hmha1	-1.10713	0.00501677	0.0278864
Rasa4	-1.15247	0.00505621	0.0280759
Cdc42ep4	-1.20303	0.00506727	0.0281022
Ppm1j	-1.30691	0.00507101	0.02811
Hist1h2be	1.08556	0.00508499	0.0281745
Slc27a2	1.53763	0.00510892	0.0282597
Zfp658	-1.53972	0.00510974	0.0282597
Fgd4	1.24117	0.00532789	0.0292645
D10Wsu102e	-1.03665	0.00533069	0.0292663
Gimap6	-1.16309	0.00535214	0.0293441
Zbtb37	-1.0312	0.00538604	0.0295166
Glipr2	-1.05842	0.00541424	0.0296576
Pusl1	-1.08783	0.00546126	0.0298543
Arhgap9	-1.21628	0.00547145	0.029877
Mfsd7b	-1.12877	0.00547165	0.029877
Eif2ak2	-1.30801	0.00548526	0.0299241
Smco1	-1.25439	0.00550031	0.0299926
Pex7	1.05707	0.00552085	0.030023
Rps24	-1.08774	0.00556303	0.0302251
Zfp715	-1.02014	0.00558948	0.0303551
Asna1	1.09559	0.00560294	0.0304145
Dlat	1.04463	0.00562504	0.0305073
Peg3	-1.13476	0.0056251	0.0305073
H2-K1	-1.01185	0.00566975	0.030708
Il18r1	-2.24599	0.00568431	0.030773
Gm45606	1.08026	0.00572467	0.0309636
Glycam1	-5.06105	0.00572861	0.0309637
Cox11	1.23842	0.00575796	0.0311018
Slamf8	-1.41173	0.00576267	0.0311132
Fam212a	-1.58173	0.00576854	0.031131
Mthfd1l	-1.43806	0.00579948	0.0312675
Zfp87	-1.08081	0.005805	0.0312717
Emid1	-1.35378	0.0058445	0.0314704
Abcg2	-1.38115	0.00584907	0.0314809
Cox7a2l	-1.25177	0.00588635	0.0315619
Rpl7	-1.13539	0.00588772	0.0315619
Wrn	-1.22696	0.00590434	0.0316229
Prkab2	-1.19466	0.00597547	0.0319277
Fam131a	-1.20223	0.00601122	0.0320528
Sidt1	-1.58352	0.00602637	0.0321193
Ikbip	-1.26388	0.00606586	0.0322726
Cd8a	-1.68208	0.00616467	0.032726
Utp11l	-1.48778	0.00626437	0.0331093
Tmem205	-1.55189	0.00628213	0.0331741
Ccl22	-1.77806	0.00633752	0.0333496
A930012O16Rik	-1.33203	0.00635621	0.0333895
Gna12	1.21178	0.00635404	0.0333895
Clmn	-1.02404	0.00639409	0.0335446
Rps12-ps3	-2.10996	0.0064042	0.033583
Nfkbie	-1.06364	0.00641283	0.0336136
Serf1	-1.18274	0.00648712	0.0339439
H2-M3	-1.07913	0.00650062	0.0339702
Zfp59	-1.05093	0.00650036	0.0339702
Map1b	1.10151	0.00650492	0.0339751
Mcmdc2	-1.59771	0.00651001	0.0339751
Impad1	1.41109	0.00652291	0.0339835
Tufm	1.09116	0.00651823	0.0339835
Nfkbil1	-1.53325	0.0065568	0.0341157
Brip1	1.56178	0.00661437	0.0343707
Nek1	-1.04946	0.00661829	0.0343763
Hmgn3	-1.02251	0.00662802	0.034412
Fam107b	-1.14661	0.00670158	0.0347326
Appl1	-1.09721	0.00670991	0.0347472
Txn1	-1.14261	0.00671743	0.0347712
RP24-216P6.3	-1.85595	0.00673891	0.0348674
Snhg1	-1.65018	0.00677326	0.0350301
Slc25a35	1.01014	0.00679728	0.0351241
S1pr5	1.60233	0.00680814	0.0351652
Haus5	-1.01169	0.00681931	0.0351927
Sec14l4	1.14721	0.00682991	0.0352323
Hpgd	-1.28871	0.00686827	0.0353483
Otud6b	1.40507	0.00687002	0.0353483
Ccna2	1.134	0.00689738	0.0354285
Afap1	1.04553	0.00691631	0.0354803
Cldn5	-1.49036	0.00693264	0.0355489
Oplah	1.10488	0.00699655	0.0358462
Lnx1	-1.02867	0.00700346	0.0358663
Ly86	-1.25179	0.00705681	0.0360935
Mov10	-1.01195	0.0070797	0.0361798
Trpv2	-1.13199	0.0070886	0.0362099
Ankrd13d	-1.30537	0.00718306	0.0365993
Six4	-1.35655	0.00722352	0.0367587
Gpm6b	-1.24191	0.00725172	0.0368711
Rps14	-1.58246	0.00726141	0.0368926
Xrn1	-1.03661	0.00726265	0.0368926
Igf1	-1.15231	0.00729764	0.0370108
Jchain	-3.25983	0.00729647	0.0370108
Cbr3	-1.29343	0.00732271	0.0371067
Glb1l2	-1.14439	0.00733886	0.0371416
Nav2	1.13207	0.00746506	0.0376852
Ramp3	1.74136	0.00755291	0.0380645
2018-09-06	-1.34992	0.00755599	0.0380645
H2-T10	-1.14989	0.00756852	0.0381117
Arhgap15	-1.89748	0.00760058	0.0382571
Gm45188	1.45185	0.00766876	0.0385358
Tbxa2r	1.79659	0.00769341	0.0386275
Shank1	-1.57576	0.00784056	0.0391703
Ier5	-1.08515	0.00787539	0.0393117
Coq9	1.16853	0.00789471	0.0393428
Rgs2	-1.13515	0.00794667	0.0394874
Pitpnm1	-1.14073	0.00798302	0.0396353
Fbxo33	1.04602	0.00806852	0.039992
Rbm12	-1.46217	0.00807147	0.039992
Dgat2	-1.01494	0.00813662	0.0402629
Slfn5	-1.04056	0.00814287	0.0402629
Cd46	-1.4357	0.0082111	0.04051
mt-Atp8	1.88842	0.00837852	0.0412249
Hsp90aa1	1.09435	0.00854986	0.0419309
Kmt5a	1.16382	0.00857146	0.0420026
Zfp61	-1.03041	0.00857849	0.0420119
Chp2	-1.02225	0.00867213	0.042358
Il2ra	-1.71127	0.0087298	0.0425706
Paxbp1	-1.07161	0.00876856	0.0427423
Iah1	-1.09537	0.00878917	0.0427908
Rere	1.0832	0.00887414	0.0430652
Adra1a	1.2155	0.00894224	0.0433432
Sycp3	1.23593	0.00897297	0.0434572
Olfr338	-1.2582	0.00902684	0.0436829
Alpk1	-1.23639	0.00903355	0.0436979
Unc5a	1.12612	0.00908602	0.0439025
Abi3bp	-1.43613	0.00909557	0.0439273
Gm20605	-1.019	0.00916727	0.0442026
Fam195b	-1.01544	0.00924488	0.0445234
Tnfsf12	-1.01586	0.00936952	0.0450156
Prkaa2	1.17969	0.00937998	0.0450299
Tnfrsf25	-1.01348	0.00937657	0.0450299
Pde1a	-1.06091	0.00941494	0.0451553
Shf	-1.14879	0.0094211	0.0451553
AI606181	1.00516	0.00953069	0.045626
Fcho2	-1.12713	0.00954297	0.0456424
Rpl22l1	-1.80836	0.00954668	0.0456424
Rpl30	-1.09538	0.00964011	0.0460579
Dld	1.1256	0.00969442	0.0462491
Sod2	1.04928	0.00969541	0.0462491
Il1r2	1.8878	0.00972345	0.0463278
Rpl37rt	-1.17452	0.00975538	0.0464432
Cd200	-1.18124	0.00976923	0.0464907
Plxnc1	-1.36597	0.00977336	0.046492
1700112E06Rik	-1.04931	0.00982796	0.0466513
Gm11851	-1.18089	0.0098301	0.0466513
Nos2	-1.01704	0.00989367	0.046916
Cyba	-1.01553	0.0100005	0.0472922
Neurl3	-1.08714	0.0100182	0.0473386
Ppp1r13l	-1.33231	0.0101181	0.047661
Ubd	-1.45607	0.010125	0.0476751
Nfatc2ip	-1.01693	0.0101608	0.047806
Slc16a9	-1.30021	0.0102248	0.0480697
Ctsw	-1.44013	0.0103329	0.0485588
Il2rb	-1.41127	0.0103569	0.0486338
Tbc1d10a	-1.14004	0.010393	0.0487843
Hif1a	1.23408	0.010437	0.0489529
Ptpn22	-1.71575	0.0105111	0.0491469
Thbs4	2.92506	0.010495	0.0491469
Uvssa	-1.22933	0.0105245	0.0491715
Kng2	1.24823	0.0105687	0.0493207
Cd2	-1.38723	0.0106607	0.049673
Pank1	1.16626	0.0106746	0.0496933
Pigp	-1.02976	0.0106762	0.0496933
Slfn2	-1.20693	0.0107467	0.0499576
C1s1	-1.02214	0.0107628	0.049994

## Sheet: sWAT
symbol	log2-foldchange	p-value	q-value
Uqcrb	7.15452	4.46705e-128	5.37832e-124
Emc2	5.41748	2.0419e-72	1.22922e-68
Dio2	7.64953	4.31529e-60	1.4687e-56
Elovl3	8.33121	4.8794e-60	1.4687e-56
mt-Nd1	8.30248	1.95071e-57	4.69732e-54
mt-Cytb	7.31606	2.58278e-56	5.18279e-53
Tbca	4.17033	1.72575e-55	2.96829e-52
Kng2	7.69864	1.09754e-46	1.65179e-43
Aspa	6.09776	2.15869e-45	2.88784e-42
Psmc6	5.22158	6.09524e-43	7.33866e-40
mt-Nd4	7.66058	1.02994e-41	1.12732e-38
Elovl6	3.8806	8.79007e-41	8.81937e-38
mt-Nd4l	7.67248	1.43225e-40	1.32649e-37
Lgr6	7.67514	1.58273e-40	1.36115e-37
Dusp2	-4.14974	1.98866e-40	1.59623e-37
mt-Co2	7.12699	2.29544e-40	1.72732e-37
mt-Nd2	8.09147	2.0307e-38	1.43821e-35
Psg16	4.2613	4.77755e-37	3.19565e-34
Dynlt3	4.43803	5.59665e-37	3.54651e-34
Lyrm5	4.35298	7.17191e-37	4.31749e-34
Gk	5.51359	1.29436e-36	7.42099e-34
Echdc1	4.43132	3.69034e-36	1.97484e-33
Vldlr	3.30506	3.77254e-36	1.97484e-33
mt-Co1	6.94789	6.30057e-36	3.16079e-33
Nsdhl	3.37208	9.01558e-36	4.3419e-33
Znrf1	-2.31439	2.70682e-35	1.25347e-32
Gm21962	6.85681	2.91632e-35	1.30046e-32
Car14	4.93319	5.94319e-35	2.55557e-32
Susd3	-3.89164	8.04011e-35	3.33803e-32
Fabp3	7.06672	8.52772e-35	3.42246e-32
Basp1	-4.10479	5.68749e-34	2.20895e-31
Mstn	7.9219	1.08393e-33	4.0783e-31
Orm1	2.27065	9.47678e-33	3.45759e-30
Ddx3y	4.8754	1.93665e-32	6.85803e-30
2310069B03Rik	7.72522	2.98137e-32	1.02559e-29
Dhrs9	7.21958	4.65134e-32	1.55561e-29
Zap70	-3.46325	8.28468e-32	2.69588e-29
Abcd3	3.15496	9.0391e-32	2.86397e-29
Fundc2	4.86834	1.19749e-31	3.69687e-29
Cetn3	4.83905	3.53244e-31	1.06326e-28
Decr1	3.36978	3.91375e-31	1.14931e-28
Agl	3.24662	4.06802e-31	1.16617e-28
Deptor	4.31764	4.91415e-31	1.34469e-28
Hspa9	3.3322	4.8623e-31	1.34469e-28
4931406C07Rik	3.67835	5.06798e-31	1.35597e-28
Gpd2	3.81005	5.50645e-31	1.44125e-28
Ptcd3	2.84502	8.41297e-31	2.15515e-28
Ppargc1a	5.83828	9.46691e-31	2.37462e-28
Gja1	3.11378	2.56732e-30	6.30827e-28
mt-Nd5	7.67651	3.11455e-30	7.49983e-28
Pabpn1	-2.24507	2.34631e-29	5.53912e-27
Tmem69	4.48501	3.45361e-29	7.99645e-27
B230118H07Rik	4.43927	5.37109e-29	1.22015e-26
Khdrbs3	3.92295	5.60758e-29	1.22755e-26
Nampt	3.13359	5.54253e-29	1.22755e-26
Sgk2	7.59139	8.83638e-29	1.89982e-26
Mrpl1	4.29268	1.66601e-28	3.51908e-26
Poln	3.30331	2.5809e-28	5.3576e-26
Sucla2	4.19689	3.68153e-28	7.51282e-26
Gnl3	2.40962	4.02109e-28	8.069e-26
Perm1	5.1387	6.02539e-28	1.18927e-25
Esrrg	4.36247	6.48713e-28	1.25976e-25
Cops2	4.47914	8.02905e-28	1.53444e-25
Taf13	4.76209	9.45457e-28	1.77864e-25
Gm10032	6.85707	1.019e-27	1.8875e-25
1110059E24Rik	3.05698	3.11245e-27	5.67786e-25
Fam217b	2.58516	3.61403e-27	6.49447e-25
Gm12216	-3.23194	1.63024e-26	2.88648e-24
AB124611	-3.02278	1.71174e-26	2.98686e-24
Lipt1	3.06477	1.99552e-26	3.4323e-24
Phkb	3.41309	2.75758e-26	4.67623e-24
Cyp2b10	6.80091	3.15542e-26	5.27656e-24
Pglyrp1	-3.80996	7.34443e-26	1.21133e-23
Dld	4.56922	1.04507e-25	1.70036e-23
Ppp2r3a	4.19267	1.15931e-25	1.86109e-23
mt-Atp6	7.76292	1.23068e-25	1.94966e-23
Insm1	-4.30503	1.74341e-25	2.72606e-23
Uba3	3.54521	2.04877e-25	3.16246e-23
Tyrobp	-3.04437	2.70026e-25	4.11534e-23
Them4	3.82624	2.89656e-25	4.35933e-23
Lrrc39	5.62634	5.50122e-25	8.17713e-23
Adcy10	3.684	5.98488e-25	8.78755e-23
Ptprd	3.53399	8.81103e-25	1.27813e-22
Cd36	3.707	1.03034e-24	1.47683e-22
RP23-143B2.2	2.96826	1.15511e-24	1.63618e-22
Gm20605	-3.56095	1.43968e-24	2.01556e-22
Gm20594	7.01133	1.5546e-24	2.15143e-22
Matk	-2.97346	3.17202e-24	4.33989e-22
S100b	3.90638	4.58944e-24	6.20863e-22
Mzb1	-3.56632	8.91575e-24	1.19273e-21
Uqcrc2	3.32331	1.47124e-23	1.94656e-21
mt-Atp8	7.16531	1.55928e-23	2.04062e-21
Fastkd2	3.91127	1.95095e-23	2.52574e-21
Gm15241	8.10498	2.79868e-23	3.5847e-21
Dok1	-3.31264	3.02178e-23	3.82971e-21
Patl1	2.43486	3.92346e-23	4.86994e-21
Sacm1l	2.9855	3.88447e-23	4.86994e-21
Cend1	4.78622	8.37334e-23	1.01833e-20
Npm3	-3.11481	8.36168e-23	1.01833e-20
Neu2	5.22331	9.70912e-23	1.16898e-20
Ergic2	3.6611	1.26672e-22	1.51003e-20
Crebzf	-2.94829	1.28787e-22	1.52019e-20
Snhg20	-2.84137	1.37704e-22	1.60966e-20
Hibch	3.2826	1.73417e-22	2.00764e-20
Btf3l4	2.83843	1.80949e-22	2.03609e-20
Sycp3	6.31172	1.79528e-22	2.03609e-20
Tinf2	-1.82285	1.79234e-22	2.03609e-20
Cyba	-3.66759	1.9322e-22	2.15404e-20
C1qa	-2.85898	2.06217e-22	2.27784e-20
Kcna3	-4.95099	2.3341e-22	2.55478e-20
Ppp1r3b	3.90771	2.54096e-22	2.75614e-20
Idh3a	3.62914	3.17592e-22	3.41411e-20
Sc5d	2.86875	4.10243e-22	4.37109e-20
Smndc1	2.37822	4.2644e-22	4.5038e-20
Rmnd1	2.97889	4.39565e-22	4.56238e-20
Sirt7	-2.98729	4.38569e-22	4.56238e-20
Gm21983	-3.24439	5.76471e-22	5.93223e-20
S1pr4	-4.018	5.92172e-22	6.04216e-20
Hmgcs1	2.75396	6.40455e-22	6.4799e-20
Lyrm7	3.86787	7.98922e-22	8.01585e-20
Pik3ip1	-2.18877	9.4783e-22	9.4313e-20
Dph6	2.69617	1.06889e-21	1.05487e-19
Mme	3.91946	1.87026e-21	1.83073e-19
Stag2	3.23445	2.09696e-21	2.03608e-19
Nudt17	-3.08659	2.35351e-21	2.2669e-19
Sema4f	-3.27499	2.8053e-21	2.68062e-19
Mob4	2.62482	2.9019e-21	2.75109e-19
Hadhb	3.05207	3.02926e-21	2.8494e-19
Fndc5	4.09704	3.16539e-21	2.95437e-19
E330011O21Rik	3.88646	3.58131e-21	3.31684e-19
Ptgr2	2.87612	4.3205e-21	3.9709e-19
Capza2	2.97666	4.7582e-21	4.34006e-19
Elovl5	1.52476	5.03153e-21	4.55486e-19
Pcca	3.11415	5.2601e-21	4.72624e-19
Gadd45b	-3.36552	7.02101e-21	6.2617e-19
Atg10	3.60306	7.34343e-21	6.45364e-19
Rasal1	-3.25502	7.314e-21	6.45364e-19
Kcnj2	4.79983	7.41016e-21	6.4651e-19
Esf1	4.57088	7.56853e-21	6.55577e-19
Coa5	2.52637	9.20107e-21	7.91292e-19
Gfm1	3.45789	9.54445e-21	8.15001e-19
Canx	2.65495	1.01122e-20	8.57403e-19
C030034I22Rik	-2.79744	1.07438e-20	9.04586e-19
Gm14403	5.36915	1.33381e-20	1.11521e-18
Fgd4	4.34554	1.49669e-20	1.24277e-18
Atg4a	3.22811	1.60562e-20	1.32409e-18
Pfdn4	3.79744	1.75478e-20	1.43725e-18
Zak	3.23044	1.76999e-20	1.43991e-18
Snx20	-3.33973	1.80773e-20	1.46074e-18
Relb	-3.32848	1.92091e-20	1.54185e-18
Gm4631	3.9655	2.09522e-20	1.67063e-18
Polr2k	4.16147	2.18545e-20	1.73111e-18
2310002L09Rik	6.53743	2.30231e-20	1.81175e-18
Mrpl47	3.38475	2.32643e-20	1.81885e-18
Timm21	3.34056	2.37488e-20	1.84475e-18
Znrd1as	4.95393	2.76314e-20	2.13258e-18
C1qb	-2.19879	2.95311e-20	2.26468e-18
Scrn3	3.09131	2.97361e-20	2.26597e-18
Fam103a1	3.22781	3.59008e-20	2.71852e-18
Arhgap22	-3.09147	4.04283e-20	3.04223e-18
Alyref	-2.38111	4.28146e-20	3.20179e-18
Otud5	-1.738	4.4083e-20	3.2562e-18
Relt	-2.78334	4.38305e-20	3.2562e-18
Fxr1	3.53767	4.53639e-20	3.33038e-18
Adtrp	3.77165	5.23249e-20	3.81813e-18
Zfp131	3.417	5.2823e-20	3.83126e-18
Syne3	-2.05608	6.48577e-20	4.67597e-18
Cenpa	-3.22098	7.03662e-20	5.04291e-18
Tceb1	4.35828	7.24905e-20	5.16441e-18
Ndufs1	2.87818	8.67381e-20	6.1431e-18
Dcun1d1	3.53329	8.74215e-20	6.15529e-18
Tpmt	2.65494	8.86717e-20	6.20702e-18
Vwa8	3.09629	9.20204e-20	6.4042e-18
Ptpn18	-4.16087	1.08405e-19	7.50114e-18
Dut	-2.28997	1.10366e-19	7.59321e-18
Lyrm4	3.39385	1.12202e-19	7.67561e-18
Slc25a17	2.70529	1.1586e-19	7.88111e-18
Hcst	-3.65825	1.4247e-19	9.63675e-18
Rpf2	3.51396	1.55971e-19	1.0491e-17
Klk8	-2.82065	1.94582e-19	1.30154e-17
Epb41l4aos	-4.43817	2.16137e-19	1.43647e-17
Skp1a	3.87494	2.17141e-19	1.43647e-17
Rps19	-3.18962	2.35135e-19	1.54701e-17
Actr6	3.77091	2.39552e-19	1.56751e-17
Slc37a1	-2.83665	2.43195e-19	1.58274e-17
Rnf139	2.45954	2.53592e-19	1.64153e-17
Casp12	4.28225	2.79596e-19	1.80018e-17
Clic5	3.18918	2.9855e-19	1.90336e-17
Mlip	5.00944	2.98784e-19	1.90336e-17
Gm45470	3.29412	3.07114e-19	1.94613e-17
Thoc2	4.63531	3.13769e-19	1.9779e-17
Nr2c2ap	-2.50951	3.17198e-19	1.9891e-17
Kif2a	3.47379	3.19801e-19	1.99503e-17
Matr3	3.68114	3.22757e-19	2.00309e-17
Tmem126b	1.84498	3.47197e-19	2.14372e-17
Mir142hg	-5.32434	3.59499e-19	2.20835e-17
Fabp4	3.44326	3.65385e-19	2.23311e-17
Ddhd2	2.68318	4.20361e-19	2.55614e-17
Hephl1	3.69523	4.36767e-19	2.64255e-17
Batf3	-4.16861	4.46822e-19	2.68987e-17
Utp14b	4.60329	4.87874e-19	2.92239e-17
Rbfox1	5.3698	5.13019e-19	3.0578e-17
1600020E01Rik	-3.21325	5.76975e-19	3.42206e-17
Cdk4	-1.76425	6.40644e-19	3.78106e-17
Cfp	-2.85871	6.54621e-19	3.8447e-17
Arhgap9	-3.31046	6.76874e-19	3.9561e-17
Spa17	5.39994	7.56334e-19	4.39916e-17
Ucp1	5.57378	7.71978e-19	4.46856e-17
Etfdh	3.08375	8.63494e-19	4.97439e-17
Cacnb3	-3.26097	8.91175e-19	5.1094e-17
Csde1	2.78296	9.05129e-19	5.15947e-17
Itm2c	-2.42652	9.08477e-19	5.15947e-17
Shtn1	3.71345	9.30306e-19	5.25863e-17
Rps2	-3.43433	1.01376e-18	5.70359e-17
Trbc1	-3.26765	1.05449e-18	5.90512e-17
Snrpd1	2.6094	1.14921e-18	6.4058e-17
Cript	3.32198	1.23781e-18	6.86785e-17
Trdmt1	3.06181	1.40636e-18	7.76722e-17
Lurap1	2.46041	1.64523e-18	9.04499e-17
Mfsd2a	5.17511	1.68523e-18	9.22278e-17
9330159M07Rik	3.46779	1.74315e-18	9.49663e-17
Fgf1	3.03455	1.92271e-18	1.04277e-16
Tatdn1	4.59432	2.39139e-18	1.29113e-16
Ptprs	-1.97096	2.60401e-18	1.39966e-16
Izumo4	-2.48404	2.65395e-18	1.42016e-16
Usmg5	3.45827	2.75002e-18	1.46505e-16
Cd163l1	-3.7674	2.99029e-18	1.58604e-16
Apool	4.50531	3.11545e-18	1.64518e-16
Batf	-3.23636	3.16567e-18	1.66439e-16
Clybl	2.06624	3.52535e-18	1.84544e-16
Eif3e	4.0068	3.55893e-18	1.85496e-16
Atp1b2	3.36364	4.11508e-18	2.13558e-16
Ide	2.85603	4.22589e-18	2.18368e-16
Ddx3x	2.89169	4.2762e-18	2.20023e-16
Luzp1	1.9699	4.38219e-18	2.24517e-16
Slc25a34	4.51676	4.45445e-18	2.27252e-16
Mrpl42	3.43463	4.49435e-18	2.28321e-16
Hspd1	3.00632	4.60952e-18	2.33188e-16
Acsl5	4.38649	5.11793e-18	2.57573e-16
Xrcc6	2.4125	5.13434e-18	2.57573e-16
Arl4c	-2.76087	5.97078e-18	2.98291e-16
Usp21	-1.61549	6.32319e-18	3.13848e-16
Wdr86	-3.37667	6.33431e-18	3.13848e-16
Mospd1	4.21916	6.39628e-18	3.1562e-16
Mterf2	3.58418	7.84369e-18	3.85461e-16
Ube2v2	4.44146	7.96326e-18	3.89747e-16
Rgs14	-2.98826	8.8122e-18	4.2955e-16
Zmynd15	-3.14646	9.78163e-18	4.74882e-16
Rpa2	-2.22116	9.88024e-18	4.77743e-16
Fbxo11	4.11623	1.06327e-17	5.12073e-16
Hmgn5	3.48685	1.08876e-17	5.20183e-16
Pja2	2.49209	1.0865e-17	5.20183e-16
Eif2s3y	3.8078	1.12175e-17	5.3383e-16
Eif4e	4.29054	1.14354e-17	5.42054e-16
A830018L16Rik	3.07614	1.25432e-17	5.90843e-16
Brcc3	3.58364	1.25628e-17	5.90843e-16
Mcts2	2.31543	1.31747e-17	6.17214e-16
Fam131c	7.49832	1.34244e-17	6.2647e-16
Nfkbia	-2.57556	1.36177e-17	6.3304e-16
Pls3	3.58097	1.5145e-17	7.01329e-16
Tnfrsf25	-3.17471	1.57791e-17	7.27893e-16
Phf14	2.47421	1.59124e-17	7.3124e-16
Amot	3.00971	1.70186e-17	7.79102e-16
Trim67	2.93084	1.79822e-17	8.20096e-16
Nos1	4.18453	1.82427e-17	8.2572e-16
Pcyt1a	2.30547	1.82421e-17	8.2572e-16
Dcaf6	2.73002	2.02581e-17	9.10104e-16
Mri1	-2.26271	2.02252e-17	9.10104e-16
Immt	2.91164	2.03734e-17	9.11879e-16
Smad7	-2.24894	2.08954e-17	9.31778e-16
Gm43302	4.44639	2.14783e-17	9.5424e-16
Tbc1d10c	-3.10897	2.27384e-17	1.00651e-15
Eef1b2	-1.96087	2.32729e-17	1.0264e-15
Cbr2	-2.8867	2.3565e-17	1.03549e-15
Letmd1	3.23381	2.64575e-17	1.15836e-15
Tnfaip8l2	-2.82966	2.89368e-17	1.26231e-15
Gm45090	4.50619	2.9523e-17	1.28324e-15
Tap1	-2.64983	3.15246e-17	1.36531e-15
Akr1e1	2.41846	3.18006e-17	1.37233e-15
Cxadr	3.21969	3.24646e-17	1.39598e-15
A530053G22Rik	5.5856	3.58395e-17	1.53562e-15
Qser1	3.88179	3.9308e-17	1.67826e-15
Rpl3	-1.76301	4.02789e-17	1.71363e-15
Rars2	3.11412	4.24144e-17	1.79813e-15
Rab1a	2.46397	4.26085e-17	1.80002e-15
Mrps25	1.81234	4.27713e-17	1.80027e-15
Oxsm	2.54119	4.29134e-17	1.80027e-15
Lysmd2	-2.31564	4.32774e-17	1.80924e-15
3830406C13Rik	4.20655	4.38446e-17	1.82661e-15
Hmha1	-3.21584	4.75531e-17	1.97427e-15
Nsmce4a	-2.1925	4.78912e-17	1.98148e-15
Taf1d	4.57458	4.81467e-17	1.98523e-15
Nemf	3.8511	4.87464e-17	2.0031e-15
Cycs	4.95075	4.89464e-17	2.00447e-15
Bbip1	3.12305	5.11929e-17	2.08937e-15
Gm21967	6.08045	5.2253e-17	2.11827e-15
Ube2w	4.48373	5.2198e-17	2.11827e-15
Meis3	-2.72995	5.25265e-17	2.12221e-15
Chrna2	3.81616	5.32427e-17	2.14395e-15
Mtch2	2.16525	5.93273e-17	2.381e-15
Olfr1396	6.79274	6.01876e-17	2.40751e-15
Hnrnph2	3.11224	6.09798e-17	2.42309e-15
Sec11c	-2.38976	6.08537e-17	2.42309e-15
Pstpip1	-2.61941	6.38609e-17	2.52923e-15
Arhgap5	4.19432	6.5342e-17	2.57281e-15
Tmem106b	3.29403	6.56025e-17	2.57281e-15
Vps33b	-1.99736	6.54355e-17	2.57281e-15
Cideb	3.51413	6.6264e-17	2.59032e-15
H2-T23	-3.16345	6.76674e-17	2.6354e-15
Rtn4ip1	2.34602	6.7855e-17	2.6354e-15
Prkaa2	3.82266	6.85142e-17	2.65245e-15
Fastkd1	2.97163	7.47028e-17	2.88276e-15
Eif4g2	3.01127	8.85783e-17	3.40729e-15
Mrpl35	2.71496	9.07508e-17	3.47975e-15
Mbnl2	2.55041	9.19446e-17	3.51433e-15
Il4i1	-3.06657	9.55017e-17	3.63874e-15
Carmil2	-3.06836	1.03431e-16	3.92843e-15
Anapc10	3.05019	1.06715e-16	4.04041e-15
mt-Nd6	7.85754	1.0948e-16	4.13209e-15
Gm14443	4.39904	1.15745e-16	4.3549e-15
mt-Co3	6.59716	1.23025e-16	4.61439e-15
Nucks1	2.79732	1.23911e-16	4.61884e-15
Pm20d1	3.56139	1.23715e-16	4.61884e-15
Lsm5	3.3457	1.28169e-16	4.76281e-15
Gm21750	6.34414	1.30103e-16	4.81982e-15
Sestd1	1.89717	1.33548e-16	4.93225e-15
Ptprcap	-3.38362	1.49626e-16	5.50918e-15
Kcnn4	-3.1667	1.54682e-16	5.67796e-15
Dbt	3.09102	1.55174e-16	5.67869e-15
Marcksl1	-2.52459	1.57678e-16	5.75285e-15
Acot11	4.50354	1.65234e-16	6.01031e-15
Mpdz	1.99489	1.82196e-16	6.60734e-15
Spint2	-2.95327	1.87728e-16	6.78752e-15
Acsbg1	-2.89557	1.9018e-16	6.85561e-15
Mettl5	3.3823	1.95282e-16	7.0185e-15
Zfp970	4.46222	2.04846e-16	7.3403e-15
Efcab2	4.01098	2.05792e-16	7.35234e-15
Fbxo17	-2.33917	2.18708e-16	7.76767e-15
Tmem181b-ps	-2.60539	2.18676e-16	7.76767e-15
Ahcyl1	2.40494	2.40378e-16	8.49117e-15
Pnkp	-1.73696	2.40489e-16	8.49117e-15
Cacna2d1	4.5767	2.53173e-16	8.91287e-15
Smpd5	-2.86196	2.567e-16	9.01071e-15
Tmem135	2.28298	2.58351e-16	9.04227e-15
Psmb9	-2.82637	2.69029e-16	9.38872e-15
Mpg	-2.3189	2.69896e-16	9.39175e-15
Cxcl16	-2.59315	2.77879e-16	9.64169e-15
Cbwd1	3.56954	2.83279e-16	9.8008e-15
Ier5	-3.28303	2.90284e-16	1.00144e-14
Rps20	-3.96025	2.95155e-16	1.01533e-14
Slc27a2	4.50332	3.03388e-16	1.04068e-14
Etv3	-1.66659	3.13948e-16	1.07384e-14
Vdac3	3.45804	3.2588e-16	1.1115e-14
Cdc42bpa	1.79123	3.44243e-16	1.16947e-14
Wipf3	4.21605	3.44819e-16	1.16947e-14
Pdlim4	-3.23391	3.68696e-16	1.24694e-14
Tfrc	4.60006	4.00638e-16	1.35117e-14
Dlst	2.66804	4.27456e-16	1.43759e-14
1110019D14Rik	4.51437	5.37665e-16	1.8032e-14
Bcl10	-1.58447	5.47845e-16	1.83224e-14
Sp3os	-3.56055	5.7668e-16	1.92333e-14
Lat	-2.89867	5.84802e-16	1.94503e-14
Hnmt	4.51233	6.00942e-16	1.99321e-14
Nxt1	-2.42097	6.07222e-16	2.0085e-14
Limd2	-2.74059	7.10947e-16	2.33972e-14
Paqr9	2.61296	7.11244e-16	2.33972e-14
Mocs2	2.15594	7.31378e-16	2.3994e-14
Endov	-1.93923	7.88628e-16	2.58019e-14
Ndrg2	2.37221	7.9682e-16	2.59992e-14
Naaa	-1.87516	8.23776e-16	2.68061e-14
Tk2	-1.8685	8.35684e-16	2.71203e-14
Mycl	-2.81143	8.5308e-16	2.75948e-14
Ogdh	3.12896	8.54889e-16	2.75948e-14
Nfia	2.7291	8.67851e-16	2.79383e-14
Csnk2a1	2.5643	8.94991e-16	2.87352e-14
Car13	2.48791	9.01341e-16	2.88621e-14
Med21	4.42062	9.34697e-16	2.98508e-14
Rgs10	-2.91142	1.05813e-15	3.37033e-14
Zfp971	5.64159	1.07907e-15	3.42797e-14
RP24-571A14.6	5.18241	1.09079e-15	3.45607e-14
Fchsd1	-2.12692	1.21007e-15	3.82395e-14
Cpz	-2.65916	1.28961e-15	4.06465e-14
Idi1	3.09357	1.31288e-15	4.12718e-14
Cdkn2d	-2.11076	1.52787e-15	4.79052e-14
Apmap	2.06601	1.56161e-15	4.88359e-14
Cd59a	2.80641	1.77347e-15	5.53175e-14
Gtf3c3	2.86923	1.79591e-15	5.58727e-14
Hspa4l	3.08029	1.94959e-15	6.04976e-14
D030056L22Rik	-2.07879	1.96711e-15	6.08842e-14
Nek6	-1.71473	1.98804e-15	6.13744e-14
AW209491	2.46995	2.17934e-15	6.71079e-14
Psme4	2.86568	2.23211e-15	6.85575e-14
Hacd2	1.88611	2.27118e-15	6.95802e-14
Tbc1d32	2.59311	2.3001e-15	7.02872e-14
Stard3nl	-2.48048	2.31282e-15	7.0497e-14
Glipr2	-2.84399	2.35156e-15	7.11377e-14
Gtpbp4	3.303	2.34109e-15	7.11377e-14
Nfkbid	-2.61595	2.3515e-15	7.11377e-14
Acap1	-2.74317	2.3752e-15	7.16728e-14
2018-09-07	3.16905	2.38718e-15	7.18542e-14
Gramd1a	-2.22407	2.45655e-15	7.37577e-14
Ank3	3.41696	2.5188e-15	7.54388e-14
Orm3	3.13657	2.56298e-15	7.65713e-14
Tmc7	3.02623	2.7153e-15	8.09212e-14
Mapt	3.57302	3.00006e-15	8.91871e-14
Gm21897	5.74871	3.05526e-15	9.06042e-14
Rad23b	1.59026	3.09525e-15	9.14455e-14
Ulk3	-1.84032	3.09882e-15	9.14455e-14
Tmem158	-3.81513	3.19719e-15	9.41179e-14
2410022M11Rik	-3.08488	3.26405e-15	9.56183e-14
Cd5l	-4.30551	3.25949e-15	9.56183e-14
Mpp5	3.19	3.28835e-15	9.60965e-14
Idh1	2.84502	3.34263e-15	9.74463e-14
Uap1l1	-2.70444	3.51188e-15	1.02133e-13
Ugp2	3.80119	4.72521e-15	1.37088e-13
Orai2	-2.60923	4.8086e-15	1.39172e-13
Pdp2	2.19282	4.84469e-15	1.3988e-13
H2-Q4	-2.44824	5.01946e-15	1.4458e-13
Ccdc138	3.60393	5.05254e-15	1.45185e-13
Slc27a3	-2.55891	5.12459e-15	1.46905e-13
Plet1os	4.31492	5.67037e-15	1.62164e-13
Tpst1	-2.20125	5.82015e-15	1.66054e-13
Ptp4a1	2.84831	5.93543e-15	1.68942e-13
Tmem191c	-2.93853	6.21257e-15	1.76413e-13
Trbv1	-3.92275	6.51276e-15	1.84503e-13
Tdrd3	2.84495	6.80877e-15	1.92436e-13
1810037I17Rik	-2.20464	8.10858e-15	2.28635e-13
Il12rb1	-3.20237	8.23741e-15	2.31725e-13
Ubxn11	-2.82734	8.33398e-15	2.33895e-13
Src	-2.42923	8.7746e-15	2.45689e-13
Sdha	2.55287	8.97982e-15	2.50852e-13
Gm11127	-2.79252	9.03811e-15	2.51314e-13
Lipo3	3.88802	9.03405e-15	2.51314e-13
Mrpl50	2.76799	9.91159e-15	2.74967e-13
B430212C06Rik	2.4852	1.09499e-14	3.03074e-13
Pank1	3.53421	1.16927e-14	3.22891e-13
Trbv31	-3.6521	1.2395e-14	3.41502e-13
Pdhx	2.36886	1.32011e-14	3.6288e-13
Spi1	-2.31051	1.32624e-14	3.63735e-13
Dok2	-3.02676	1.42441e-14	3.89771e-13
D3Ertd751e	3.5797	1.51385e-14	4.13306e-13
Dnm1l	2.37717	1.54856e-14	4.21824e-13
Nipsnap3b	-1.69667	1.59547e-14	4.33622e-13
Spata17	3.66923	1.60354e-14	4.34833e-13
BC028528	4.79877	1.61658e-14	4.37384e-13
Gpsm1	-2.67119	1.6284e-14	4.39595e-13
Klhdc8b	-2.51565	1.69063e-14	4.55374e-13
Pycard	-2.53131	1.80986e-14	4.86401e-13
Gm4841	3.48896	1.87278e-14	5.02189e-13
Pcmtd1	3.73196	1.94629e-14	5.2074e-13
Ppp6c	2.27437	2.06485e-14	5.51238e-13
Usp15	2.58464	2.09939e-14	5.59218e-13
Snx10	3.00802	2.11653e-14	5.62539e-13
Arhgef12	2.22202	2.16886e-14	5.72655e-13
Lemd2	-2.39183	2.16269e-14	5.72655e-13
Thoc1	3.66666	2.16618e-14	5.72655e-13
Asb15	6.02828	2.18191e-14	5.7484e-13
Trim11	-2.03239	2.26633e-14	5.95777e-13
Mthfd2l	-2.41321	2.28985e-14	6.0065e-13
Trbc2	-2.23002	2.29669e-14	6.01134e-13
Cant1	-1.6375	2.38804e-14	6.23686e-13
Pdk4	3.91989	2.39445e-14	6.24008e-13
Gmpr	5.09102	2.61927e-14	6.81124e-13
Mfap2	-2.67716	2.64809e-14	6.85656e-13
Tuba8	3.40396	2.64365e-14	6.85656e-13
Tmx4	2.38095	2.73276e-14	7.0606e-13
Cdt1	-2.81251	2.89105e-14	7.45359e-13
Rps9	-3.04663	3.25278e-14	8.3681e-13
Slc16a1	2.54175	3.25967e-14	8.3681e-13
Irf3	-1.62959	3.38783e-14	8.67862e-13
Amy1	3.80495	3.4262e-14	8.75827e-13
Nfib	2.71205	3.67217e-14	9.36714e-13
Eif2b3	2.015	3.75753e-14	9.56462e-13
Adamts10	-2.6773	3.76656e-14	9.56737e-13
Sdc1	-2.05708	3.8157e-14	9.6718e-13
Mmgt1	2.89536	3.94078e-14	9.96785e-13
Pparg	2.19133	4.03874e-14	1.01942e-12
Patz1	-2.24745	4.22925e-14	1.06369e-12
Sar1b	2.55406	4.23179e-14	1.06369e-12
9430037G07Rik	4.24373	4.28524e-14	1.07488e-12
Gabarap	2.22884	4.51334e-14	1.12909e-12
Gins2	-2.16838	4.52012e-14	1.12909e-12
Sypl	2.26108	4.64338e-14	1.15748e-12
Chtop	-1.64181	4.65373e-14	1.15766e-12
Tipin	2.7036	4.69397e-14	1.16527e-12
A530017D24Rik	3.65361	4.82971e-14	1.1965e-12
D5Ertd579e	1.66302	5.01294e-14	1.23934e-12
Pon3	2.69822	5.17858e-14	1.27767e-12
Ssb	3.35211	5.27944e-14	1.29723e-12
Xrcc4	3.80046	5.27067e-14	1.29723e-12
Grk6	-2.52827	5.35222e-14	1.31244e-12
Plekha4	-2.35746	5.43111e-14	1.32908e-12
Kyat3	2.08104	5.50715e-14	1.34495e-12
4930427A07Rik	-3.42845	5.60396e-14	1.36582e-12
Megf9	2.97581	5.70316e-14	1.38719e-12
Ampd1	4.28675	5.77967e-14	1.40297e-12
Ankrd40	1.94788	6.05847e-14	1.46769e-12
Arhgef1	-2.97893	6.30263e-14	1.52158e-12
Zfp160	4.50774	6.30621e-14	1.52158e-12
Sh3bgrl	3.33717	6.49479e-14	1.56395e-12
Ndrg3	2.70466	6.76525e-14	1.62582e-12
Dcun1d4	1.92298	6.94111e-14	1.66299e-12
Gm16675	-3.42315	6.94753e-14	1.66299e-12
Grap	-2.62014	6.96709e-14	1.66436e-12
Rack1	-2.33777	7.05149e-14	1.68119e-12
Ppp1r3c	3.22489	7.09971e-14	1.68934e-12
Ube2k	2.26152	7.15921e-14	1.70014e-12
Acadl	3.09524	7.23666e-14	1.71515e-12
Asb5	4.93614	7.27332e-14	1.72045e-12
Ptpn4	3.95046	7.61686e-14	1.79818e-12
Tm9sf1	-1.31231	7.7103e-14	1.81667e-12
1700021F05Rik	2.55001	8.16989e-14	1.9212e-12
Tsga10	3.08716	8.67802e-14	2.03671e-12
Mybpc1	5.5808	8.81613e-14	2.0651e-12
Bzw1	2.92507	9.08123e-14	2.12307e-12
Cnp	-2.62764	9.10681e-14	2.12492e-12
Hes6	-2.58215	9.17082e-14	2.13572e-12
Lfng	-2.41997	9.19135e-14	2.13637e-12
H3f3b	-2.0507	9.25367e-14	2.14671e-12
Ktn1	2.82305	9.38758e-14	2.17359e-12
Zgpat	-1.79501	9.69378e-14	2.24017e-12
Nudt7	1.88555	9.98252e-14	2.30248e-12
Gba2	-1.90191	1.01345e-13	2.33307e-12
Sec14l4	3.27736	1.04417e-13	2.3992e-12
Pde8a	1.72397	1.08861e-13	2.49655e-12
Adgrl1	-1.71478	1.15065e-13	2.62882e-12
Scarb2	1.95541	1.14942e-13	2.62882e-12
2018-09-02	2.5819	1.18056e-13	2.69204e-12
Prex2	2.86244	1.19534e-13	2.72057e-12
Col1a1	-2.78197	1.23319e-13	2.80145e-12
Actr5	-2.31346	1.40732e-13	3.19099e-12
Dclk2	-2.23789	1.41312e-13	3.19812e-12
Tmeff1	1.95326	1.44787e-13	3.2706e-12
Aqp4	5.6278	1.45534e-13	3.28132e-12
Haus5	-2.50237	1.47278e-13	3.31444e-12
Spag9	2.21903	1.48551e-13	3.33687e-12
Lin7c	3.61048	1.50969e-13	3.38486e-12
Igsf9	-2.51057	1.51501e-13	3.39047e-12
Gm21833	5.34044	1.57485e-13	3.51786e-12
Slmo2	2.51229	1.6834e-13	3.75335e-12
Coro1a	-3.48938	1.72918e-13	3.84831e-12
Mutyh	-2.26829	1.75118e-13	3.89008e-12
Gm45552	-3.07379	1.76816e-13	3.92057e-12
Rfc5	-1.89744	1.79228e-13	3.96673e-12
Fam219b	-2.05658	1.79837e-13	3.97291e-12
Carns1	-2.15246	1.80285e-13	3.97552e-12
Tmed5	2.816	1.84287e-13	4.05634e-12
Rassf7	-2.93424	1.88339e-13	4.13796e-12
Rrnad1	-2.03283	1.90243e-13	4.17218e-12
Akap6	4.6844	2.04427e-13	4.47508e-12
Cirbp	-2.4232	2.09476e-13	4.57731e-12
Sit1	-3.16109	2.1926e-13	4.78242e-12
Rab43	-4.6082	2.27795e-13	4.9596e-12
Acsl3	3.40241	2.31104e-13	5.02255e-12
Ctla2a	3.232	2.36625e-13	5.13328e-12
Rtn4	2.40031	2.41338e-13	5.22609e-12
Fam210a	2.5504	2.48966e-13	5.38159e-12
Fopnl	1.58546	2.57381e-13	5.55353e-12
1500011B03Rik	-2.46462	2.61729e-13	5.63236e-12
Rap2b	-2.13845	2.6197e-13	5.63236e-12
Mepce	-1.51502	2.72473e-13	5.84772e-12
Iffo1	-2.41405	2.76493e-13	5.92344e-12
Stom	2.36476	2.7867e-13	5.94891e-12
Zfp867	3.32037	2.78466e-13	5.94891e-12
2018-09-10	2.18595	3.07562e-13	6.55406e-12
Srp9	-2.28525	3.10044e-13	6.59528e-12
BC002059	4.49081	3.12145e-13	6.62241e-12
Ppm1l	2.57698	3.12419e-13	6.62241e-12
Spata22	5.89255	3.20432e-13	6.78032e-12
Vps54	2.55676	3.22461e-13	6.81128e-12
Pisd-ps1	-2.01363	3.24442e-13	6.84113e-12
Psmd1	1.48947	3.35355e-13	7.05887e-12
Rcn3	-2.44359	3.43503e-13	7.21775e-12
Slc4a4	4.10112	3.52247e-13	7.38859e-12
Aspn	4.75859	3.58075e-13	7.49779e-12
Gsdmd	-2.50581	3.59251e-13	7.50934e-12
Chn1	2.14155	3.62181e-13	7.55746e-12
Maoa	2.68988	3.98531e-13	8.30159e-12
Kpna3	2.55345	4.02993e-13	8.38002e-12
Gm8113	2.37107	4.30411e-13	8.93474e-12
Ldhb	3.24338	4.34707e-13	9.0039e-12
Map3k14	-2.13799	4.35238e-13	9.0039e-12
Cdca8	-2.52173	4.46006e-13	9.21082e-12
Yipf7	4.86749	4.65359e-13	9.59405e-12
Zfp688	-2.89979	4.90108e-13	1.0087e-11
Pde6d	-1.77086	5.009e-13	1.02915e-11
Gtf3c6	3.43068	5.03105e-13	1.03192e-11
Acbd5	2.69256	5.04158e-13	1.03232e-11
Tspan33	-2.2172	5.12731e-13	1.04809e-11
Cidea	2.95379	5.20987e-13	1.06317e-11
Fbp2	3.66072	5.22324e-13	1.06409e-11
Cyp2j6	1.74901	5.24694e-13	1.06711e-11
Mmachc	2.87319	5.32622e-13	1.08141e-11
Mdk	-2.67805	5.34263e-13	1.08292e-11
Orc3	3.51035	5.37419e-13	1.08748e-11
Plppr3	-2.3775	5.63919e-13	1.13919e-11
Clip4	3.05704	5.70819e-13	1.1512e-11
Nudt16	-2.11135	5.93861e-13	1.19567e-11
Cdca3	-2.21645	5.95573e-13	1.19711e-11
Pigr	2.88871	6.05557e-13	1.21515e-11
Dnajc7	1.84647	6.12914e-13	1.22787e-11
Spire1	2.10572	6.22372e-13	1.24474e-11
Rps27rt	4.86983	6.37766e-13	1.27342e-11
Als2cr12	3.73322	6.63795e-13	1.32101e-11
Chrd	-2.19519	6.63453e-13	1.32101e-11
Armc7	-2.17135	6.80386e-13	1.35179e-11
BC043934	-1.57737	6.8993e-13	1.36849e-11
Clcf1	-2.68173	7.19902e-13	1.42559e-11
Cpeb3	1.81977	7.31375e-13	1.44594e-11
Srl	3.79729	7.41677e-13	1.4639e-11
Ldb1	-2.11133	7.43621e-13	1.46533e-11
Snrpb2	3.6836	7.62885e-13	1.50084e-11
Smim15	3.50305	7.74671e-13	1.52154e-11
Ric8a	-1.95725	7.81728e-13	1.5329e-11
Igfbp7	-1.83851	7.84624e-13	1.53608e-11
Crbn	2.42544	8.0915e-13	1.58152e-11
G6pdx	2.23007	8.21595e-13	1.60324e-11
BC017643	-2.38201	8.31983e-13	1.62089e-11
Pdhb	2.42379	8.73054e-13	1.69815e-11
Trak2	1.46717	8.74663e-13	1.69854e-11
Plekhg6	-2.64448	8.84153e-13	1.7142e-11
Lace1	2.47873	9.165e-13	1.77406e-11
Smarcd2	-1.36038	9.37921e-13	1.81261e-11
Aldh1a7	2.18209	9.43274e-13	1.82003e-11
Hps1	-2.04706	9.45078e-13	1.8206e-11
Gtpbp10	2.67497	9.4873e-13	1.82471e-11
Amd1	3.68584	9.79862e-13	1.88158e-11
Esrrb	4.43236	9.94182e-13	1.90604e-11
Dusp15	2.20861	1.00238e-12	1.9187e-11
Rabl3	2.95897	1.02706e-12	1.96282e-11
Usp2	2.01178	1.0764e-12	2.05312e-11
Zxdb	-2.6059	1.07772e-12	2.05312e-11
Donson	-2.58913	1.09316e-12	2.07924e-11
Actn2	4.13072	1.09862e-12	2.08635e-11
Mmaa	2.41977	1.11968e-12	2.12298e-11
Ndnl2	-1.73768	1.14056e-12	2.15917e-11
Sbk2	3.78945	1.14618e-12	2.1664e-11
Myo5b	3.70257	1.18802e-12	2.24196e-11
Nubp1	-2.32485	1.19036e-12	2.24287e-11
Lipa	2.64253	1.21682e-12	2.28915e-11
Nqo2	2.9129	1.22669e-12	2.30412e-11
Gramd4	-1.83033	1.25385e-12	2.35146e-11
Proca1	3.09317	1.2706e-12	2.37917e-11
Clcn2	-2.19356	1.27376e-12	2.38138e-11
Rnf19b	-1.87141	1.27792e-12	2.38545e-11
Uty	3.73271	1.28872e-12	2.40188e-11
Casp8ap2	3.09138	1.29585e-12	2.41144e-11
Zfp52	4.57478	1.29837e-12	2.4124e-11
Gm2415	-2.7452	1.31225e-12	2.43443e-11
Gm45563	3.53555	1.3269e-12	2.45783e-11
4930480K23Rik	2.59934	1.3439e-12	2.48549e-11
Ndufa5	3.72183	1.35797e-12	2.50705e-11
Trmt2a	-1.93864	1.35972e-12	2.50705e-11
Stxbp4	2.45181	1.36355e-12	2.51026e-11
Slc11a1	-2.0038	1.36911e-12	2.51665e-11
Ppp3cb	2.4847	1.37456e-12	2.52282e-11
Vsir	-1.87062	1.41027e-12	2.58442e-11
Xirp1	4.29307	1.4224e-12	2.60269e-11
Cmas	-1.65196	1.4832e-12	2.70822e-11
Mkln1	2.36266	1.48457e-12	2.70822e-11
Bmp1	-1.79967	1.52251e-12	2.77285e-11
Usf1	-1.73192	1.52461e-12	2.77285e-11
Snhg15	-3.39317	1.53211e-12	2.78229e-11
Lpcat4	-2.64093	1.53822e-12	2.78919e-11
Man1c1	-1.92687	1.55781e-12	2.82046e-11
Pkp3	-3.20539	1.56311e-12	2.82581e-11
Rgs7	2.42374	1.58679e-12	2.8643e-11
Bche	3.60814	1.65891e-12	2.98555e-11
Gys2	3.4987	1.65788e-12	2.98555e-11
Nkiras1	1.68855	1.68693e-12	3.03143e-11
Fam177a	2.51904	1.72394e-12	3.09333e-11
Ebag9	2.43146	1.75724e-12	3.14839e-11
Srsf2	-2.58436	1.7664e-12	3.1601e-11
Gm42984	-5.07189	1.77439e-12	3.16967e-11
Slc16a2	1.89292	1.7795e-12	3.17409e-11
Fam193b	-1.90983	1.7922e-12	3.19202e-11
Mex3b	-2.22644	1.79825e-12	3.19807e-11
Trappc8	2.72522	1.82253e-12	3.23647e-11
Gnao1	2.82369	1.89652e-12	3.36291e-11
Slc38a3	3.45171	1.94801e-12	3.44913e-11
Ampd3	1.97655	1.96772e-12	3.47637e-11
BC003331	2.29402	1.96917e-12	3.47637e-11
H2-M3	-2.64756	2.0053e-12	3.53496e-11
Col16a1	-2.53811	2.04043e-12	3.59164e-11
Zfhx4	3.1094	2.05306e-12	3.60859e-11
Kcnh6	8.23685	2.08205e-12	3.65421e-11
Myo5c	2.95341	2.17214e-12	3.80677e-11
C1qc	-2.92457	2.18456e-12	3.82298e-11
Yme1l1	3.29509	2.29478e-12	4.01004e-11
Fhl1	2.90637	2.33634e-12	4.07675e-11
Clock	2.63804	2.33996e-12	4.07716e-11
Ap1g1	1.88201	2.39611e-12	4.16896e-11
Lck	-2.629	2.40314e-12	4.17515e-11
Nckap1	2.23304	2.50268e-12	4.34182e-11
Meg3	-2.04682	2.54231e-12	4.40422e-11
Cdh24	-2.67753	2.56573e-12	4.43842e-11
Dgkz	-1.84321	2.65199e-12	4.58105e-11
Irf8	-2.42928	2.8534e-12	4.92192e-11
Dnaja3	2.43772	2.90987e-12	5.01213e-11
Arl8b	2.069	3.06091e-12	5.26476e-11
Il4ra	-2.27298	3.1186e-12	5.35634e-11
Tmem86a	-2.16816	3.23259e-12	5.54422e-11
Slc38a4	3.32262	3.29814e-12	5.64859e-11
2410016O06Rik	-2.01307	3.31479e-12	5.66904e-11
Mob1b	2.97406	3.36323e-12	5.74373e-11
Pkia	3.98316	3.42539e-12	5.84159e-11
Fbxo40	4.46554	3.45325e-12	5.88078e-11
Unc119	-2.79102	3.46068e-12	5.88511e-11
RP23-337J18.2	11.059	3.51494e-12	5.96896e-11
S1pr2	-2.02642	3.53758e-12	5.99894e-11
Adgrl4	2.54689	3.56351e-12	6.03441e-11
Ddx1	2.37155	3.57517e-12	6.04566e-11
Rps3	-1.86199	3.59285e-12	6.06702e-11
Dhx9	2.72337	3.6911e-12	6.22421e-11
Gpatch3	-2.13202	3.72206e-12	6.26763e-11
Col1a2	-2.51233	3.80292e-12	6.39007e-11
Col20a1	-1.97812	3.80538e-12	6.39007e-11
Plcb4	2.93633	3.8236e-12	6.41172e-11
Fkbp3	3.11386	3.83009e-12	6.41367e-11
Tmem159	-2.20051	3.92629e-12	6.56563e-11
Tstd3	2.92074	4.0099e-12	6.69614e-11
Cep290	4.90063	4.03378e-12	6.72669e-11
Cdkn2aipnl	-1.44569	4.07046e-12	6.77847e-11
Fam65c	-3.08989	4.08654e-12	6.79585e-11
Tmc8	-2.56628	4.15134e-12	6.89408e-11
Unkl	-1.55722	4.16457e-12	6.90653e-11
2810001G20Rik	-2.62588	4.18206e-12	6.926e-11
Als2cl	-1.92162	4.25179e-12	7.03181e-11
Ecm2	2.70214	4.28636e-12	7.07925e-11
Ehhadh	1.912	4.30032e-12	7.09258e-11
Kcnab2	-2.59134	4.38838e-12	7.22793e-11
Il27ra	-2.69812	4.48734e-12	7.38081e-11
Mrps2	2.37159	4.59757e-12	7.55181e-11
Nol8	3.29846	4.69148e-12	7.69557e-11
Usp9x	3.43715	4.70656e-12	7.7098e-11
Psma3	1.90335	4.71484e-12	7.71287e-11
Mccc1	1.48635	4.80042e-12	7.84221e-11
Nckap5l	-2.50119	4.80729e-12	7.84279e-11
2010016I18Rik	-2.43448	4.89592e-12	7.97657e-11
Izumo1r	-2.92365	4.92703e-12	8.01641e-11
Trp53inp2	2.28793	4.98971e-12	8.10743e-11
Setd4	-2.13103	5.05111e-12	8.19614e-11
Vamp1	-1.68944	5.12163e-12	8.29939e-11
AI314180	2.17886	5.14217e-12	8.32146e-11
Gm2564	-2.87595	5.17337e-12	8.36073e-11
Pde4a	2.06575	5.22766e-12	8.43714e-11
Pde4dip	2.8487	5.35529e-12	8.63155e-11
Fermt3	-2.64064	5.46551e-12	8.79742e-11
Nfkb2	-2.2709	5.49645e-12	8.83542e-11
Clpx	1.8768	5.56909e-12	8.94025e-11
Npnt	3.64372	5.6003e-12	8.97838e-11
Ttn	4.8942	5.69662e-12	9.12065e-11
Rpl6	-2.05134	5.70577e-12	9.12317e-11
Neb	5.05481	5.81443e-12	9.28458e-11
Otud1	-1.69555	5.93977e-12	9.47217e-11
Tmem164	-1.71884	5.97843e-12	9.52121e-11
Tk1	-2.69943	5.99688e-12	9.53798e-11
Baiap3	-2.98062	6.1245e-12	9.7281e-11
B130055M24Rik	-2.89401	6.30449e-12	1.00008e-10
Mast3	-2.20526	6.34648e-12	1.00542e-10
AI846148	-2.07525	6.53633e-12	1.03413e-10
Pigv	-1.48677	6.58495e-12	1.04046e-10
2010315B03Rik	2.88135	6.60483e-12	1.04223e-10
Wrnip1	-1.88065	6.65146e-12	1.04821e-10
Galnt12	-2.92337	6.68529e-12	1.05217e-10
Atp8b2	-1.96156	6.80779e-12	1.07005e-10
Adam11	-2.52726	6.85376e-12	1.07587e-10
Prdx1	3.43619	6.91671e-12	1.08434e-10
Mmp23	-2.9288	7.61078e-12	1.1916e-10
Klhl41	3.94941	7.71304e-12	1.20604e-10
Unc13d	-3.01582	7.90148e-12	1.2339e-10
Cldn12	1.83346	7.94148e-12	1.23854e-10
H2-Q6	-2.55826	7.97536e-12	1.24222e-10
Sfi1	-1.89555	8.27103e-12	1.28661e-10
Exoc3l4	-2.47751	8.32819e-12	1.29272e-10
Ttc25	4.40022	8.33184e-12	1.29272e-10
1700040L02Rik	4.62551	8.55671e-12	1.3259e-10
Pafah2	1.94145	8.71027e-12	1.34623e-10
Ptpn1	-1.89831	8.70021e-12	1.34623e-10
Fam129c	-2.54242	8.74118e-12	1.34919e-10
Zfp251	-1.57224	8.75179e-12	1.34919e-10
Bahd1	-1.80774	8.89035e-12	1.36879e-10
Otud6b	3.55682	9.10502e-12	1.40006e-10
Oxct1	2.01443	9.12917e-12	1.40198e-10
A730020M07Rik	3.11082	9.39788e-12	1.44141e-10
Nrros	-2.45067	9.53207e-12	1.46013e-10
Zfp933	3.4327	9.70043e-12	1.48403e-10
Grk2	-1.82105	9.8291e-12	1.50181e-10
Bend5	-2.57471	9.84794e-12	1.50278e-10
Ssh3	-2.16277	9.97675e-12	1.52051e-10
Zdhhc18	-1.84254	9.99689e-12	1.52165e-10
4930426D05Rik	-3.5604	1.07652e-11	1.63652e-10
Chic2	-2.04253	1.08059e-11	1.64065e-10
Lactb2	2.62857	1.09071e-11	1.65393e-10
Fas	2.25527	1.10674e-11	1.67612e-10
5830411N06Rik	-2.9395	1.10978e-11	1.67861e-10
Leprotl1	-1.40865	1.14504e-11	1.72977e-10
Gmip	-2.38848	1.15854e-11	1.74798e-10
Zfp212	-2.03384	1.19733e-11	1.80423e-10
E130307A14Rik	-1.9558	1.20787e-11	1.81785e-10
Mdh1	1.83509	1.21085e-11	1.82005e-10
Bzrap1	-3.41087	1.21418e-11	1.82278e-10
Mplkip	-2.05931	1.22585e-11	1.83801e-10
Cdc42se1	-1.71348	1.23936e-11	1.85596e-10
Haao	-2.62722	1.25067e-11	1.87012e-10
Npr3	2.345	1.25296e-11	1.87012e-10
Rpl37a	-3.04424	1.25348e-11	1.87012e-10
Fmo1	2.25305	1.2587e-11	1.87559e-10
Mis18a	-2.48459	1.26364e-11	1.88062e-10
Ttll3	-2.42042	1.28698e-11	1.91299e-10
Abce1	2.53825	1.29278e-11	1.91688e-10
Pik3cd	-2.46646	1.29225e-11	1.91688e-10
N4bp2l2	3.2235	1.31465e-11	1.94692e-10
Wdr90	-2.62245	1.32324e-11	1.95722e-10
Tbc1d15	2.68772	1.36076e-11	2.01025e-10
Bcl2l12	-2.0723	1.3704e-11	2.01954e-10
Exoc3	1.78723	1.37036e-11	2.01954e-10
Mtrf1	2.27091	1.37713e-11	2.02698e-10
Hk2	2.60345	1.47611e-11	2.17e-10
Lpl	2.15703	1.47972e-11	2.17266e-10
Aoc2	-2.08851	1.54812e-11	2.26491e-10
Chm	3.13185	1.54819e-11	2.26491e-10
Gphn	2.10736	1.54473e-11	2.26491e-10
Plxna2	1.67462	1.59338e-11	2.3282e-10
Ptbp2	2.41093	1.60604e-11	2.34385e-10
Oxnad1	2.00944	1.659e-11	2.4182e-10
Cyth4	-2.21054	1.70006e-11	2.47207e-10
Khnyn	-1.82078	1.69869e-11	2.47207e-10
Gm14325	4.50919	1.74062e-11	2.528e-10
Ccdc134	-1.88591	1.75518e-11	2.54606e-10
Gm45187	2.50755	1.77851e-11	2.57681e-10
Clec3b	-3.30986	1.78472e-11	2.5827e-10
Zswim5	4.63455	1.80517e-11	2.60916e-10
Mtfr1	1.80437	1.83418e-11	2.64791e-10
Ndufaf4	2.66716	1.85293e-11	2.67176e-10
Fam189b	-2.51253	1.88286e-11	2.71168e-10
Sigirr	-2.86256	1.893e-11	2.72302e-10
Fktn	3.09644	1.95789e-11	2.813e-10
Alpl	3.54155	1.9651e-11	2.82e-10
Pik3c2a	2.64273	2.03363e-11	2.91487e-10
Traf3	-1.20216	2.08703e-11	2.98786e-10
Stag1	2.49918	2.09086e-11	2.98978e-10
Gfm2	1.67222	2.14856e-11	3.06864e-10
St3gal5	3.54907	2.19178e-11	3.12666e-10
Usp33	2.09862	2.20956e-11	3.1483e-10
Usp32	2.22318	2.25125e-11	3.2039e-10
Uvrag	-1.28362	2.27752e-11	3.23746e-10
Adamts14	-2.74078	2.37457e-11	3.37144e-10
Gtf2ird2	-1.54219	2.41133e-11	3.41961e-10
Itpkc	-1.58043	2.41785e-11	3.42482e-10
Ankrd35	-2.22952	2.4237e-11	3.42673e-10
Magt1	2.3626	2.4249e-11	3.42673e-10
Galnt10	-1.99459	2.45124e-11	3.4599e-10
Rnf215	-1.77342	2.51578e-11	3.54684e-10
Plbd1	1.63596	2.52781e-11	3.55963e-10
Ndufaf1	2.32079	2.53865e-11	3.57071e-10
Lat2	-2.41875	2.57855e-11	3.61839e-10
Rrad	-2.0701	2.57732e-11	3.61839e-10
Ocel1	-1.9637	2.58892e-11	3.6287e-10
Slc2a6	-2.58859	2.60802e-11	3.65122e-10
Fam126b	3.69602	2.73631e-11	3.82638e-10
Abcc9	2.19956	2.74285e-11	3.83108e-10
Mtus1	2.31493	2.75126e-11	3.83838e-10
Kctd9	2.14878	2.80161e-11	3.9041e-10
E2f1	-2.05008	2.81437e-11	3.91734e-10
Ccdc127	2.2035	2.82765e-11	3.93128e-10
Cpn2	2.98775	2.95256e-11	4.10021e-10
Tank	3.22167	2.97063e-11	4.12055e-10
Mical2	1.82686	2.98317e-11	4.13318e-10
Kcnb1	2.04796	2.99322e-11	4.14234e-10
H2-T10	-2.42006	3.06335e-11	4.23453e-10
Slc7a2	2.49904	3.11929e-11	4.30691e-10
Arl5c	-2.21395	3.12863e-11	4.31486e-10
Stau2	2.20399	3.15099e-11	4.34072e-10
Zfp322a	3.97142	3.16171e-11	4.35051e-10
Rora	2.26507	3.17643e-11	4.36578e-10
Clic1	-2.07543	3.19898e-11	4.39175e-10
Stoml1	-2.67701	3.30161e-11	4.52749e-10
Pde1a	2.73022	3.57782e-11	4.90067e-10
Otop1	3.40072	3.61212e-11	4.94203e-10
Tug1	3.71711	3.63193e-11	4.9635e-10
Fkbp7	2.58364	3.63712e-11	4.96495e-10
Eif2a	3.3069	3.65973e-11	4.99017e-10
Cnih4	1.70555	3.67562e-11	5.0005e-10
Ephx2	1.46065	3.67363e-11	5.0005e-10
Kitl	2.68273	3.76649e-11	5.10681e-10
Lmod3	4.39002	3.76012e-11	5.10681e-10
Lsm8	-1.84682	3.76234e-11	5.10681e-10
Fcho1	-2.63781	3.79587e-11	5.14086e-10
Lpcat3	1.66012	3.80048e-11	5.14133e-10
Ppcdc	-1.36449	3.827e-11	5.17139e-10
Sipa1	-2.2464	3.96833e-11	5.35635e-10
1810032O08Rik	-2.50874	3.98036e-11	5.36057e-10
Dnase2a	-1.53376	3.97813e-11	5.36057e-10
Mpzl2	2.25706	4.01255e-11	5.39789e-10
Ift81	3.07828	4.15271e-11	5.5802e-10
Ctsh	-1.73553	4.17121e-11	5.59882e-10
Uqcrh	2.64048	4.2924e-11	5.75507e-10
Hk3	-2.80742	4.34699e-11	5.82178e-10
Bcap31	1.88527	4.45627e-11	5.9615e-10
1810022K09Rik	3.55303	4.47206e-11	5.97598e-10
mt-Nd3	7.6283	4.50577e-11	6.01435e-10
U2surp	2.85732	4.63943e-11	6.18591e-10
Chtf8	-1.53134	4.65108e-11	6.19458e-10
Cpsf4	-1.25334	4.70784e-11	6.26324e-10
Rps5	-3.12091	4.81916e-11	6.40427e-10
Murc	5.09149	4.8278e-11	6.40868e-10
Cyp4f18	-2.40962	4.85567e-11	6.43858e-10
Olfr466	4.11603	4.87997e-11	6.46368e-10
Mrgbp	-1.52611	4.94949e-11	6.54856e-10
Crlf3	-1.83699	4.98379e-11	6.5867e-10
Lrpprc	1.64837	5.05473e-11	6.67313e-10
Trmt1	-1.60049	5.12306e-11	6.75592e-10
Cyp2f2	3.01365	5.18621e-11	6.82426e-10
Esrp2	3.65604	5.18394e-11	6.82426e-10
Fastkd5	2.6776	5.20531e-11	6.84192e-10
Htra2	-2.18092	5.24049e-11	6.88064e-10
Nabp1	2.23469	5.27739e-11	6.92154e-10
Tbce	2.18091	5.32118e-11	6.97138e-10
Tmem51	-2.47365	5.4044e-11	7.07272e-10
Rgs5	2.57106	5.41082e-11	7.07342e-10
Abcg1	-1.79866	5.45718e-11	7.12629e-10
Cdca4	-1.71869	5.51875e-11	7.19889e-10
Prpsap1	-1.74852	5.55991e-11	7.24473e-10
Maob	2.36262	5.56676e-11	7.24581e-10
Prdx3	1.78791	5.59746e-11	7.27791e-10
Qk	2.31594	5.71656e-11	7.42474e-10
Zbtb24	-1.26727	5.73031e-11	7.43459e-10
Fgfbp3	-2.22114	5.73806e-11	7.43653e-10
Usp13	4.05517	5.74416e-11	7.43653e-10
4930415O20Rik	6.40903	5.81544e-11	7.52072e-10
Acd	-1.63792	6.0219e-11	7.77937e-10
Tmem184a	4.54904	6.09605e-11	7.86671e-10
Tacr2	8.90062	6.27318e-11	8.08663e-10
Rnf135	-1.71126	6.56795e-11	8.45755e-10
Hadha	2.78754	6.77329e-11	8.71266e-10
Myom1	3.82993	6.83503e-11	8.78268e-10
Commd2	-1.59464	6.86897e-11	8.81689e-10
Dlg1	2.3124	6.93786e-11	8.89583e-10
Agap2	-2.40071	7.0254e-11	8.9985e-10
Erp29	-2.0342	7.06942e-11	9.04525e-10
Tspyl3	-2.19413	7.20841e-11	9.21329e-10
Mcc	1.86287	7.36406e-11	9.40226e-10
Ccdc88b	-2.57279	7.62787e-11	9.72877e-10
Ank	2.07893	7.70929e-11	9.82221e-10
Spata2l	-1.47563	7.7416e-11	9.85294e-10
Mcts1	4.56176	7.75138e-11	9.85498e-10
Gm20400	-2.84583	7.82191e-11	9.93415e-10
Gm15446	3.48895	7.89004e-11	1.00101e-09
Eno2	-2.5259	7.93499e-11	1.00566e-09
Adamts2	-1.52659	8.07549e-11	1.02239e-09
Tradd	-2.31792	8.20658e-11	1.03789e-09
Rab3il1	-1.8896	8.30342e-11	1.04904e-09
Bmp8b	8.12674	8.42436e-11	1.0632e-09
Itgb7	-2.69604	8.63523e-11	1.08867e-09
Frat2	-2.12839	8.67471e-11	1.09251e-09
Crhr2	4.03646	8.70661e-11	1.09538e-09
Slc4a8	-1.95982	8.73086e-11	1.09728e-09
Wash1	-1.65302	8.74861e-11	1.09837e-09
Tapbpl	-1.58726	8.85017e-11	1.10996e-09
Stac3	3.17037	8.93165e-11	1.11901e-09
Snx11	-2.02219	9.15554e-11	1.14587e-09
Gm45606	-2.18071	9.56596e-11	1.19599e-09
Unc93b1	-2.20679	9.80842e-11	1.22504e-09
Lrrc52	6.61723	9.8749e-11	1.23206e-09
Tmem181a	-1.62484	1.04018e-10	1.29646e-09
Gimap5	-1.9471	1.07488e-10	1.33832e-09
Haus4	-1.88618	1.09294e-10	1.3594e-09
Ctcflos	2.36417	1.09527e-10	1.35949e-09
Osbpl9	2.23093	1.09415e-10	1.35949e-09
Bcl7c	-3.16642	1.11142e-10	1.37811e-09
Nnat	-2.2874	1.11331e-10	1.37904e-09
Ddo	1.85903	1.1147e-10	1.37935e-09
Ldlrad3	1.53741	1.12421e-10	1.38969e-09
Arid5a	-2.28723	1.13082e-10	1.39641e-09
Napb	2.98695	1.13426e-10	1.39923e-09
Adam12	2.3465	1.14926e-10	1.41629e-09
Rcan2	2.58808	1.16461e-10	1.43373e-09
Rcc2	-2.07109	1.17109e-10	1.44024e-09
Clcn1	3.88086	1.18496e-10	1.4558e-09
Ankrd16	-1.75344	1.21652e-10	1.49306e-09
Tcf3	-2.05427	1.22831e-10	1.506e-09
Tyk2	-1.93947	1.23135e-10	1.50818e-09
Zfand1	1.89135	1.24728e-10	1.52614e-09
Ankrd13d	-2.77346	1.26214e-10	1.54276e-09
Gm45091	-3.29195	1.27186e-10	1.55307e-09
Rpl5	3.25383	1.28009e-10	1.56152e-09
1810026B05Rik	-2.66631	1.28497e-10	1.56589e-09
Ak6	2.84712	1.30885e-10	1.59338e-09
Dvl2	-1.99793	1.31382e-10	1.59782e-09
Cd40	-2.2274	1.31835e-10	1.60171e-09
Dnajc25	2.02532	1.33333e-10	1.61827e-09
Cpxm1	-2.03009	1.36651e-10	1.65688e-09
Emid1	-2.88959	1.37107e-10	1.66073e-09
Nmt2	1.97739	1.38888e-10	1.68061e-09
Pisd-ps2	-2.26085	1.40546e-10	1.69897e-09
Mtif2	2.28345	1.41238e-10	1.70562e-09
Zbtb8os	2.17314	1.42525e-10	1.71944e-09
H2-Q7	-2.98795	1.45604e-10	1.75308e-09
Tmem38b	2.00345	1.4559e-10	1.75308e-09
9330159F19Rik	3.70654	1.46135e-10	1.75771e-09
Inhbb	-2.48673	1.51602e-10	1.82164e-09
Trim55	4.74902	1.55141e-10	1.86231e-09
Wdyhv1	-1.6536	1.59571e-10	1.91358e-09
Arid3a	-1.82016	1.64331e-10	1.9687e-09
Eps8l1	-2.0152	1.64561e-10	1.9695e-09
Ppp4r2	2.15364	1.66023e-10	1.98502e-09
Pla2g7	2.97679	1.67145e-10	1.99645e-09
H2-Ab1	-2.23935	1.69141e-10	2.0183e-09
Zfp931	4.27743	1.74705e-10	2.08262e-09
Cks2	-1.93443	1.78524e-10	2.12604e-09
Tcf19	-2.1233	1.79204e-10	2.13203e-09
Ak3	1.65912	1.88233e-10	2.23724e-09
Itgb3bp	3.43694	1.88965e-10	2.24372e-09
Plcd4	4.72222	1.90395e-10	2.25848e-09
Klhl23	3.51878	1.90963e-10	2.26298e-09
Glmn	3.68767	1.91181e-10	2.26334e-09
Ctsw	-2.71604	1.99064e-10	2.35436e-09
Smpx	4.17303	2.02483e-10	2.39244e-09
Gm10516	2.3477	2.06245e-10	2.4345e-09
Rnf166	-1.65616	2.08369e-10	2.45716e-09
B4galt2	-3.00835	2.12203e-10	2.49992e-09
Myo9b	-1.4558	2.1263e-10	2.50251e-09
Eif4e3	1.89393	2.14914e-10	2.52692e-09
Nkd1	-2.16537	2.17919e-10	2.55802e-09
Nsun3	2.78469	2.17984e-10	2.55802e-09
Traf5	-2.12477	2.19546e-10	2.57384e-09
Nol9	-1.31576	2.21897e-10	2.59887e-09
A430078G23Rik	-2.06459	2.2407e-10	2.62177e-09
5430405H02Rik	-1.92919	2.26168e-10	2.64375e-09
Zdhhc24	-1.80594	2.29534e-10	2.68049e-09
Stk25	-1.19741	2.31209e-10	2.69743e-09
Ttc7	-1.80686	2.36061e-10	2.75138e-09
Dcaf15	-2.14723	2.36977e-10	2.75938e-09
Cdc73	2.57063	2.38911e-10	2.77922e-09
Eif4a2	2.90902	2.41185e-10	2.80025e-09
Mylk4	5.94829	2.41005e-10	2.80025e-09
Gm16062	4.18621	2.42599e-10	2.81397e-09
Ten1	-2.71035	2.43613e-10	2.823e-09
Cyp2u1	2.29139	2.46275e-10	2.85111e-09
Pdha1	2.41326	2.47134e-10	2.85831e-09
Cul3	2.46441	2.47957e-10	2.86232e-09
Stx11	-2.10425	2.47816e-10	2.86232e-09
Mkks	1.80029	2.5226e-10	2.90921e-09
2810030D12Rik	3.54408	2.5416e-10	2.92832e-09
Cpt1b	3.21307	2.54609e-10	2.93068e-09
Clk1	3.07263	2.59984e-10	2.98969e-09
Epb41l5	1.87359	2.72205e-10	3.12724e-09
Dtx1	-2.31557	2.72586e-10	3.12864e-09
Tmppe	-1.99411	2.76768e-10	3.17361e-09
Myo1g	-2.54295	2.78287e-10	3.18799e-09
Ndufv2	2.98154	2.797e-10	3.20113e-09
Arhgef4	-2.33309	2.83279e-10	3.23901e-09
Ppp1r3a	6.97839	2.8426e-10	3.24714e-09
Lmnb2	-1.92178	2.84943e-10	3.25186e-09
Tmem80	-1.09653	2.85312e-10	3.25299e-09
Vars	-2.38125	2.92974e-10	3.33719e-09
Galnt6	-2.46123	2.94511e-10	3.35152e-09
Mrpl13	2.06245	3.02415e-10	3.43822e-09
Cyb561a3	-2.02811	3.04904e-10	3.46325e-09
H2-DMb1	-2.18787	3.07693e-10	3.48864e-09
Tspan32	-2.13792	3.07719e-10	3.48864e-09
Zfp982	4.17913	3.0882e-10	3.49783e-09
Mavs	1.59492	3.09167e-10	3.49847e-09
Icam1	-2.14524	3.10356e-10	3.50863e-09
Tmx2	1.75742	3.21513e-10	3.63134e-09
Dusp12	-2.75485	3.30813e-10	3.72939e-09
Slc7a6os	-1.59155	3.30618e-10	3.72939e-09
Mapkapk5	-2.06092	3.51441e-10	3.95823e-09
Dnajb14	2.00237	3.53828e-10	3.98139e-09
Msantd4	2.14129	3.71948e-10	4.18138e-09
Mocs3	-2.03648	3.7261e-10	4.18491e-09
Slc17a9	-2.44394	3.76716e-10	4.22708e-09
Pik3ca	2.10318	3.77912e-10	4.23655e-09
Zfp51	3.7091	3.87353e-10	4.33836e-09
Kpna6	1.55902	3.91773e-10	4.38378e-09
Metap1	1.31816	3.9545e-10	4.42081e-09
Tacc2	2.25646	3.96387e-10	4.42307e-09
Tmem243	-1.93322	3.96349e-10	4.42307e-09
Nexn	6.0273	3.97571e-10	4.43219e-09
Gstm5	1.82591	3.98647e-10	4.43596e-09
Uba7	-2.10649	3.98368e-10	4.43596e-09
Hrc	4.69085	4.03262e-10	4.48317e-09
Blzf1	2.54099	4.10185e-10	4.55593e-09
Larp4	2.34087	4.11233e-10	4.56336e-09
Adcy3	3.18562	4.16091e-10	4.6123e-09
Cwf19l2	3.91059	4.1641e-10	4.6123e-09
Gpr153	-2.08222	4.16803e-10	4.61242e-09
Polr3h	-1.98012	4.21723e-10	4.66257e-09
Ip6k1	-1.92401	4.22844e-10	4.6664e-09
Nans	-2.07712	4.22584e-10	4.6664e-09
Alkbh4	-1.75482	4.31201e-10	4.75427e-09
Rinl	-2.29511	4.34111e-10	4.78197e-09
E4f1	-1.91078	4.42498e-10	4.8699e-09
Ifitm1	-2.47718	4.44736e-10	4.89007e-09
Usp25	2.2631	4.52541e-10	4.97135e-09
AI987944	3.08948	4.56007e-10	5.00485e-09
Rab18	2.12451	4.61986e-10	5.06586e-09
Rps24	2.44495	4.65937e-10	5.10453e-09
Ube2s	-2.06058	4.70439e-10	5.14917e-09
Acat1	2.02659	4.73951e-10	5.17819e-09
Hspb7	4.38548	4.73833e-10	5.17819e-09
Mfn1	1.76586	4.75173e-10	5.18684e-09
Dusp27	3.21364	4.77737e-10	5.2101e-09
Nr4a2	2.65668	4.96373e-10	5.40845e-09
Skiv2l2	2.60068	4.97565e-10	5.41653e-09
Cs	2.274	4.98408e-10	5.4208e-09
Tmod1	3.20511	5.02387e-10	5.45915e-09
Tbc1d10a	-2.73192	5.10555e-10	5.54291e-09
Gcn1l1	-1.66252	5.12178e-10	5.55552e-09
Rpl23a	-2.36259	5.16966e-10	5.60241e-09
Lyl1	-2.42253	5.17951e-10	5.60803e-09
Grsf1	1.93274	5.28668e-10	5.71893e-09
H2-Eb1	-2.49295	5.32175e-10	5.75169e-09
Zfp966	5.07887	5.48301e-10	5.92067e-09
Birc5	-2.3659	5.53972e-10	5.97655e-09
Rftn1	-1.94923	5.58001e-10	6.01462e-09
Nfkbie	-2.07096	5.63238e-10	6.06022e-09
Sgcb	1.66347	5.6308e-10	6.06022e-09
Fscn1	-2.9009	5.6402e-10	6.06322e-09
Camk2a	3.1221	5.76324e-10	6.18996e-09
Dnajc28	2.83693	5.93815e-10	6.37213e-09
Pfkp	1.73838	5.97928e-10	6.41056e-09
Slc8b1	-2.03668	6.0949e-10	6.5287e-09
Arrdc1	-2.34959	6.24054e-10	6.67876e-09
Hsp90aa1	2.57566	6.25324e-10	6.68641e-09
Bbs7	2.14115	6.33421e-10	6.76698e-09
Tmem29	2.63194	6.40579e-10	6.83738e-09
Taf1	1.8662	6.46224e-10	6.89153e-09
Flt1	1.70041	6.47779e-10	6.902e-09
Gmfb	2.89572	6.49598e-10	6.91526e-09
Dok3	-3.33634	6.52962e-10	6.94493e-09
4921536K21Rik	2.57556	6.56758e-10	6.97914e-09
Gsta4	2.62607	6.65708e-10	7.06801e-09
Plin2	1.81696	6.66959e-10	7.07505e-09
Dnaaf2	-1.82103	6.67691e-10	7.07659e-09
Rab9	2.64741	6.74709e-10	7.14468e-09
Prkcd	-1.86413	6.79858e-10	7.19288e-09
Cul4b	2.76104	6.875e-10	7.26097e-09
Rhoh	-2.55469	6.87043e-10	7.26097e-09
Commd7	-1.22075	6.90927e-10	7.29076e-09
Cmtm3	-1.68581	6.97517e-10	7.35386e-09
Nelfb	-1.84789	7.15376e-10	7.53555e-09
Osgepl1	2.59099	7.18805e-10	7.56504e-09
Ell2	2.35242	7.268e-10	7.64251e-09
Kctd14	-2.55847	7.57242e-10	7.95567e-09
Plxnb2	-1.84795	7.64486e-10	8.02477e-09
Eea1	2.19519	7.68068e-10	8.05534e-09
Atp2a2	1.64928	7.92228e-10	8.29962e-09
Ufm1	1.56327	7.92738e-10	8.29962e-09
Dennd1c	-2.32546	7.99261e-10	8.36065e-09
Txnl4b	1.43735	8.09738e-10	8.46289e-09
Btg2	-1.99025	8.12298e-10	8.48228e-09
Zfp641	1.62721	8.14323e-10	8.49605e-09
Wdr91	-1.22018	8.20161e-10	8.54956e-09
Rai1	-1.68777	8.23185e-10	8.57366e-09
Alpk2	4.18997	8.42784e-10	8.76658e-09
Cab39l	2.31201	8.43165e-10	8.76658e-09
Aldh6a1	1.87992	8.48674e-10	8.81625e-09
Tor4a	-1.72524	8.70513e-10	9.03532e-09
Fer	2.35621	8.78522e-10	9.1106e-09
Arhgef19	3.93098	8.90715e-10	9.22909e-09
Fbxw7	1.65849	8.93343e-10	9.24836e-09
Eif1a	2.13624	9.03665e-10	9.34718e-09
Casq2	4.74279	9.06295e-10	9.35832e-09
Mal2	3.19034	9.05634e-10	9.35832e-09
Gatsl3	-2.26035	9.11339e-10	9.40233e-09
Ostf1	-1.98978	9.18509e-10	9.46819e-09
Nf1	1.58807	9.30423e-10	9.5828e-09
Ttc30b	1.63955	9.47939e-10	9.75486e-09
Nbeal1	3.34642	9.58508e-10	9.84679e-09
Tnfrsf18	-2.45749	9.57823e-10	9.84679e-09
Traf2	-1.59951	9.73159e-10	9.98878e-09
Zfp622	-1.96469	9.8495e-10	1.01012e-08
Fhdc1	3.10402	9.8756e-10	1.01193e-08
Pde7b	2.83153	9.91174e-10	1.01477e-08
Vav1	-2.4286	9.97513e-10	1.0204e-08
Zrsr1	2.93211	1.00681e-09	1.02903e-08
Atg16l2	-2.19557	1.01564e-09	1.03717e-08
BC037034	-2.24034	1.02375e-09	1.04457e-08
Dnaaf3	-2.23011	1.03426e-09	1.05441e-08
Capn3	2.66808	1.04874e-09	1.06826e-08
Arf6	-1.67042	1.05685e-09	1.07561e-08
Slc15a4	-1.80873	1.06588e-09	1.08389e-08
Rab5b	1.66556	1.07448e-09	1.09171e-08
2610044O15Rik8	3.07306	1.11331e-09	1.1302e-08
Atf2	2.20372	1.12457e-09	1.13972e-08
Gmps	1.85944	1.12413e-09	1.13972e-08
Thoc7	1.71109	1.13361e-09	1.14791e-08
2200002D01Rik	-2.99575	1.15292e-09	1.16648e-08
Nab2	-2.20371	1.16669e-09	1.17942e-08
Ccr7	-2.66931	1.18652e-09	1.19746e-08
Trdn	6.51786	1.18562e-09	1.19746e-08
Hmgn1	-2.6448	1.20407e-09	1.21415e-08
Irf2bp2	-1.47313	1.22767e-09	1.23691e-08
Bmpr2	3.06881	1.23228e-09	1.24053e-08
Psmb8	-2.44522	1.24759e-09	1.25488e-08
Spsb2	-2.08853	1.25939e-09	1.2657e-08
Asb11	4.26476	1.26371e-09	1.26898e-08
Crtac1	-2.53135	1.29062e-09	1.29492e-08
Ctnnd1	2.3743	1.30131e-09	1.30456e-08
Olfr90	3.01065	1.30492e-09	1.3071e-08
Atp13a3	2.39751	1.30652e-09	1.3076e-08
Fkbpl	1.49286	1.32465e-09	1.32465e-08
Ddit4	-3.3117	1.32889e-09	1.32778e-08
Rabggtb	1.79858	1.34204e-09	1.33982e-08
Ccdc64	-2.25849	1.34347e-09	1.34013e-08
Tusc1	-2.60171	1.35442e-09	1.34994e-08
H2-T22	-1.57503	1.36133e-09	1.3557e-08
Lrrc20	2.85461	1.37396e-09	1.36715e-08
Suclg1	2.92099	1.38948e-09	1.38145e-08
Vcpkmt	-1.78364	1.3912e-09	1.38201e-08
Hmgb3	2.24846	1.40781e-09	1.39737e-08
Arfgef1	2.22329	1.41841e-09	1.40673e-08
Synj2bp	2.66301	1.42226e-09	1.40938e-08
Shkbp1	-2.3522	1.44544e-09	1.43118e-08
6820431F20Rik	3.07066	1.4529e-09	1.43738e-08
Srp72	1.9746	1.45804e-09	1.44128e-08
H2-K1	-2.20999	1.49599e-09	1.47759e-08
Ireb2	3.30359	1.50253e-09	1.48282e-08
Olfr558	2.7487	1.51213e-09	1.49108e-08
Phyh	1.5567	1.53364e-09	1.51104e-08
Idh3g	2.15704	1.55002e-09	1.52469e-08
Nfyc	1.13116	1.54978e-09	1.52469e-08
Zbtb41	2.45111	1.56326e-09	1.53646e-08
Cbx7	-2.02656	1.57002e-09	1.54185e-08
Ric3	2.51135	1.57315e-09	1.54366e-08
Cltc	1.94236	1.58112e-09	1.54848e-08
Myl2	6.45937	1.58192e-09	1.54848e-08
Psma2	1.51319	1.5813e-09	1.54848e-08
Dmd	2.77239	1.59621e-09	1.5612e-08
Azin1	1.98003	1.61093e-09	1.57432e-08
Ephb6	-2.39826	1.61738e-09	1.57934e-08
Col5a1	-1.93621	1.63882e-09	1.59639e-08
Sh3bgrl2	2.40804	1.63761e-09	1.59639e-08
Txlnb	4.27379	1.63874e-09	1.59639e-08
Galm	1.88832	1.64135e-09	1.59757e-08
Crebrf	2.25161	1.65406e-09	1.60864e-08
Lrrc2	4.46823	1.65938e-09	1.6125e-08
Fsd1l	3.1767	1.66681e-09	1.61842e-08
Ccl19	-2.89269	1.6705e-09	1.62069e-08
Tbxa2r	-3.70085	1.69229e-09	1.64051e-08
Plekha7	-1.66951	1.70294e-09	1.64951e-08
Lmod1	2.8285	1.71297e-09	1.65789e-08
Htra3	-1.92452	1.72452e-09	1.66773e-08
Scp2	1.24205	1.75511e-09	1.69595e-08
Ranbp9	1.65979	1.77661e-09	1.71534e-08
Rnf152	2.45585	1.77812e-09	1.71543e-08
Fut11	-1.55218	1.7815e-09	1.71731e-08
Acss1	2.57604	1.7905e-09	1.72461e-08
Zfp869	2.50461	1.81817e-09	1.74986e-08
Ap5z1	-1.84796	1.85567e-09	1.78453e-08
Mtor	2.03755	1.90989e-09	1.83521e-08
Ebf2	1.84951	1.98367e-09	1.90458e-08
AI413582	-3.31847	2.00347e-09	1.92206e-08
Smco1	2.73065	2.02357e-09	1.93979e-08
Cd79b	-2.1526	2.03306e-09	1.94734e-08
Gm32200	2.06108	2.04483e-09	1.95706e-08
Hspb6	3.52149	2.05034e-09	1.96077e-08
Ccdc88c	-2.04408	2.05881e-09	1.96731e-08
Ubr5	1.53659	2.08121e-09	1.98713e-08
Ctu2	-2.63661	2.0879e-09	1.99194e-08
Sh3bp1	-2.29892	2.17428e-09	2.07271e-08
Ccl2	-3.1756	2.21388e-09	2.10879e-08
Pdp1	1.93382	2.22427e-09	2.11701e-08
Ntpcr	-1.99197	2.23663e-09	2.1271e-08
Fmnl1	-2.23002	2.26992e-09	2.1559e-08
Lrrc14b	3.81955	2.2705e-09	2.1559e-08
Slc12a2	2.34003	2.27651e-09	2.1599e-08
Eif2s1	1.69384	2.28561e-09	2.16512e-08
Krt222	2.71494	2.2854e-09	2.16512e-08
Vps35	2.2983	2.30456e-09	2.18136e-08
Zfas1	-2.68576	2.36093e-09	2.23296e-08
Opa1	1.95849	2.41203e-09	2.2795e-08
Adam33	-2.02635	2.42784e-09	2.29264e-08
Col3a1	-2.2376	2.44308e-09	2.30523e-08
Cdh19	3.83436	2.4498e-09	2.30976e-08
Lrmp	-2.29189	2.45966e-09	2.31724e-08
Mtx3	2.06177	2.46905e-09	2.32427e-08
Letm1	2.45899	2.479e-09	2.33181e-08
Man1b1	-1.326	2.52074e-09	2.36922e-08
Upf2	2.74282	2.5504e-09	2.39523e-08
Gstt2	-2.19755	2.58097e-09	2.41828e-08
Pigq	1.55429	2.57898e-09	2.41828e-08
Psmb10	-2.55425	2.58034e-09	2.41828e-08
Hn1	-2.487	2.6047e-09	2.43861e-08
Rpl18	-3.04184	2.6454e-09	2.4748e-08
Smim4	-2.59747	2.68227e-09	2.50734e-08
Chst2	-2.46874	2.74149e-09	2.56071e-08
AW549877	2.33394	2.75255e-09	2.56905e-08
Tet3	-1.42289	2.75687e-09	2.57108e-08
Acat2	1.56509	2.76505e-09	2.57672e-08
Aifm1	2.00458	2.7952e-09	2.6028e-08
Grik5	-1.80147	2.80925e-09	2.61386e-08
Ap3m1	2.47936	2.82552e-09	2.62697e-08
Rarres2	-1.76544	2.84259e-09	2.6408e-08
Ifngr1	-1.16838	2.85265e-09	2.6481e-08
Strn3	2.1804	2.86278e-09	2.65546e-08
Daxx	-1.41549	2.8765e-09	2.66613e-08
Pin4	3.58242	2.87891e-09	2.66631e-08
Ucp3	1.76483	2.95182e-09	2.73174e-08
Adat3	-3.47221	3.00096e-09	2.77508e-08
Noxo1	-2.14729	3.00925e-09	2.78061e-08
C2	-2.18245	3.01685e-09	2.7855e-08
Limk2	-1.36997	3.08005e-09	2.84167e-08
Dffb	-1.8352	3.09872e-09	2.8567e-08
Yeats4	-2.2126	3.10536e-09	2.86064e-08
Arsi	-2.04595	3.13134e-09	2.88236e-08
Slc25a35	2.21378	3.17339e-09	2.91884e-08
Hsd17b7	2.15821	3.23085e-09	2.96942e-08
Sh3gl1	-2.14803	3.23425e-09	2.97028e-08
Ank2	2.00664	3.25216e-09	2.98445e-08
Plac8	-2.89244	3.26211e-09	2.9913e-08
Coil	-1.3617	3.28442e-09	3.00947e-08
Uqcc1	1.82272	3.3197e-09	3.03949e-08
Ckmt2	4.40702	3.33703e-09	3.05112e-08
Ormdl1	3.01657	3.33748e-09	3.05112e-08
Atf6	1.9731	3.34218e-09	3.0528e-08
Myom2	4.01832	3.34439e-09	3.0528e-08
Got1	2.28496	3.35045e-09	3.05602e-08
Arhgef37	2.79938	3.37009e-09	3.06988e-08
Xirp2	5.86558	3.37075e-09	3.06988e-08
Impdh2	-1.29345	3.38312e-09	3.07882e-08
Gm14305	4.73553	3.42097e-09	3.11091e-08
Palmd	2.3389	3.44584e-09	3.13116e-08
Fancg	-1.74015	3.53223e-09	3.20725e-08
Hexa	-1.10417	3.54329e-09	3.21486e-08
Vps13a	1.56786	3.5852e-09	3.25043e-08
Itpr1	1.74744	3.60819e-09	3.26882e-08
Zhx1	2.63193	3.61508e-09	3.2726e-08
Frrs1	1.89176	3.62354e-09	3.2778e-08
Zfp783	-1.57904	3.67664e-09	3.32333e-08
Sox6	2.34753	3.7495e-09	3.38665e-08
Dync1i2	2.0481	3.79018e-09	3.42082e-08
Tmem182	2.35852	3.80101e-09	3.42802e-08
Slc25a51	1.91693	3.80548e-09	3.42949e-08
Lpin1	1.77533	3.82284e-09	3.44256e-08
5730508B09Rik	-1.84046	3.8659e-09	3.47873e-08
Cdc27	2.26815	3.87567e-09	3.48492e-08
Etl4	2.41677	3.89736e-09	3.5018e-08
Socs2	-1.74268	3.9177e-09	3.51746e-08
AI467606	-2.428	3.98631e-09	3.57373e-08
Efhd2	-2.00185	4.01439e-09	3.59355e-08
Nfatc4	-1.80658	4.01282e-09	3.59355e-08
Gin1	3.06717	4.05319e-09	3.62558e-08
Mtpap	2.10282	4.13197e-09	3.69332e-08
Zmynd19	-1.83656	4.18318e-09	3.73631e-08
Cd5	-2.84937	4.21899e-09	3.75993e-08
Cops3	1.55352	4.2181e-09	3.75993e-08
Tmem65	2.13945	4.21315e-09	3.75993e-08
Ufsp2	2.44629	4.22574e-09	3.76316e-08
Tmem203	-2.18143	4.25098e-09	3.78284e-08
Arrdc3	2.56743	4.26716e-09	3.79443e-08
Mb	5.53366	4.29268e-09	3.81431e-08
Dtna	3.35738	4.30138e-09	3.81922e-08
Prkcdbp	-2.77059	4.33332e-09	3.84475e-08
Cd2ap	2.6157	4.38508e-09	3.8878e-08
6430571L13Rik	2.49655	4.39281e-09	3.89179e-08
Rhoq	1.97116	4.40267e-09	3.89766e-08
Kif16b	2.23336	4.40986e-09	3.90116e-08
Phospho1	3.51369	4.45522e-09	3.93839e-08
Hsd3b2	2.76315	4.54783e-09	4.01731e-08
Frmd8	-2.63114	4.58715e-09	4.04907e-08
E030030I06Rik	-1.81576	4.61814e-09	4.07344e-08
Vasp	-2.43884	4.63965e-09	4.08941e-08
Dnajb4	2.65927	4.76803e-09	4.19748e-08
Tomm20	-1.96703	4.76924e-09	4.19748e-08
Prmt3	-1.65074	4.77475e-09	4.19927e-08
Hdac7	-1.69594	4.7964e-09	4.21523e-08
Azin2	-3.03606	4.82288e-09	4.23541e-08
Rasgrp2	-2.17363	4.83757e-09	4.24521e-08
Csf2ra	-2.6828	4.86436e-09	4.26562e-08
Mybl2	-2.09844	4.88101e-09	4.2771e-08
Mfsd4b3	2.57002	4.89498e-09	4.28622e-08
Parm1	2.35445	4.96042e-09	4.34037e-08
Gltscr2	-2.61355	5.01634e-09	4.38611e-08
Prex1	-1.99746	5.05995e-09	4.42103e-08
Hp	-2.20945	5.0919e-09	4.44572e-08
Fam78a	-2.36062	5.13744e-09	4.48223e-08
Rab4b	-3.65115	5.14701e-09	4.48733e-08
Trim2	1.67618	5.18599e-09	4.51804e-08
Gm42031	-2.25589	5.20161e-09	4.52837e-08
Ptgis	-2.29886	5.25251e-09	4.56938e-08
Neu1	-1.33891	5.33913e-09	4.64138e-08
Cnih1	1.47234	5.353e-09	4.65008e-08
Arfgap3	-1.47743	5.48517e-09	4.76146e-08
Ghitm	1.94829	5.5063e-09	4.77636e-08
Ccnl2	-1.59963	5.51736e-09	4.78251e-08
Arpc1b	-2.55961	5.53421e-09	4.79049e-08
Rassf9	4.1741	5.53452e-09	4.79049e-08
Tbc1d23	2.01674	5.64884e-09	4.88592e-08
Gm16211	2.50527	5.66285e-09	4.89453e-08
Atad1	3.2425	5.86114e-09	5.05944e-08
Bbof1	2.83351	5.86206e-09	5.05944e-08
Osbpl7	-1.81456	5.89721e-09	5.08613e-08
Grk3	1.91745	5.90458e-09	5.08884e-08
Myo1f	-2.12113	6.0045e-09	5.17126e-08
Bhlhe40	2.15499	6.17924e-09	5.31794e-08
Gpbp1	2.5406	6.27608e-09	5.39743e-08
Med11	-2.07248	6.30627e-09	5.41952e-08
Fam45a	2.36419	6.58217e-09	5.65259e-08
Cdc20	-2.74721	6.60308e-09	5.66551e-08
Mical1	-2.02055	6.60662e-09	5.66551e-08
Lig4	2.03615	6.62252e-09	5.6751e-08
Gm3839	2.70386	6.74974e-09	5.78001e-08
Snhg8	-3.78572	6.96347e-09	5.95879e-08
Rap1a	1.95635	7.00673e-09	5.9873e-08
Tspyl4	-1.61281	7.00561e-09	5.9873e-08
Adcy2	3.54155	7.02124e-09	5.99544e-08
Mppe1	-1.52884	7.09661e-09	6.05551e-08
Cyb561d1	-1.5051	7.13144e-09	6.08091e-08
Cacna1i	-2.41919	7.21456e-09	6.14309e-08
Myot	5.43534	7.21398e-09	6.14309e-08
Tap2	-2.0845	7.27533e-09	6.19046e-08
Ppil4	1.9889	7.31308e-09	6.21818e-08
5031425E22Rik	-2.05583	7.34876e-09	6.23971e-08
Rbpms2	1.98494	7.34735e-09	6.23971e-08
Socs3	-2.37766	7.36097e-09	6.24567e-08
Il17ra	-1.85642	7.38864e-09	6.26474e-08
Pon1	2.53118	7.418e-09	6.2852e-08
Kctd12b	2.53983	7.46818e-09	6.32327e-08
P3h1	-1.33285	7.49912e-09	6.3406e-08
Tmem119	-2.62965	7.49918e-09	6.3406e-08
Zfp930	3.48444	7.51383e-09	6.34853e-08
Pkmyt1	-2.48843	7.55585e-09	6.37955e-08
B3gnt9	-1.96356	7.68758e-09	6.48622e-08
Svbp	-2.33335	7.73336e-09	6.52028e-08
Tsc22d4	-2.14202	7.77032e-09	6.54686e-08
Lrrk1	-1.94244	7.81241e-09	6.57772e-08
Tmem253	2.71404	7.85726e-09	6.61086e-08
Gm31166	2.60388	7.90672e-09	6.64783e-08
Bbs4	1.90532	8.09105e-09	6.79807e-08
Lsm10	-1.42829	8.13627e-09	6.83129e-08
Gnptg	-1.18744	8.14252e-09	6.83177e-08
Rpgrip1l	2.38352	8.30771e-09	6.96552e-08
Haus8	-1.51112	8.37737e-09	7.01415e-08
2610002M06Rik	2.5425	8.73255e-09	7.30646e-08
Acvr1c	2.02743	8.75758e-09	7.31723e-08
Zfp639	1.46006	8.75691e-09	7.31723e-08
Agbl3	-1.92159	8.7741e-09	7.32594e-08
0610009B22Rik	1.73654	8.80392e-09	7.34575e-08
Brf1	-1.55408	9.03708e-09	7.52986e-08
Fignl2	-1.43332	9.03325e-09	7.52986e-08
Gpd1	2.25757	9.40134e-09	7.82795e-08
Chpf2	-2.23725	9.42229e-09	7.83997e-08
Hebp1	-1.60718	9.49923e-09	7.89853e-08
Acox2	2.57417	9.62169e-09	7.99483e-08
Cdyl2	-1.92729	9.73796e-09	8.08586e-08
Capg	-2.61319	9.89122e-09	8.20747e-08
Cecr5	-1.6318	1.0201e-08	8.45867e-08
Myom3	2.39038	1.02613e-08	8.50283e-08
Dram2	2.49138	1.02823e-08	8.50856e-08
Txlng	2.35628	1.02754e-08	8.50856e-08
Abracl	1.65198	1.03125e-08	8.52764e-08
C330018D20Rik	2.45654	1.04966e-08	8.67395e-08
Spock2	-1.80631	1.05675e-08	8.72649e-08
Taf9b	2.59152	1.05865e-08	8.73624e-08
Rps29	-2.83455	1.06055e-08	8.74588e-08
Zfp692	-1.57305	1.07038e-08	8.82096e-08
Psmb7	1.89651	1.08064e-08	8.8994e-08
Ikbkb	-1.36365	1.08293e-08	8.91219e-08
Msantd3	2.0607	1.0895e-08	8.96008e-08
Polr1c	-1.69815	1.09582e-08	9.0059e-08
Hsdl2	2.92811	1.1026e-08	9.05544e-08
Rprml	-3.69956	1.11161e-08	9.12321e-08
Miip	-1.78139	1.12948e-08	9.26359e-08
Calu	2.10743	1.14097e-08	9.35141e-08
Nmral1	-2.03055	1.14179e-08	9.35183e-08
Cdh13	1.64606	1.14663e-08	9.38504e-08
2310065F04Rik	4.67858	1.16312e-08	9.51358e-08
Zfp788	2.88756	1.16544e-08	9.5261e-08
Mfap3l	2.7027	1.17316e-08	9.57614e-08
Ncoa5	-1.17487	1.17444e-08	9.58011e-08
Rasal3	-2.59044	1.21224e-08	9.88176e-08
Def6	-2.25803	1.23149e-08	1.00319e-07
Rars	1.82377	1.23526e-08	1.00516e-07
Traf1	-2.53963	1.23558e-08	1.00516e-07
Entpd5	1.5453	1.24733e-08	1.01335e-07
Hnrnpa0	-2.69412	1.24706e-08	1.01335e-07
Sec22a	1.76735	1.26018e-08	1.0231e-07
Sppl2a	1.98053	1.27005e-08	1.03042e-07
Rnf24	2.07129	1.27957e-08	1.03744e-07
Lime1	-1.85002	1.28063e-08	1.03761e-07
Glcci1	-2.35041	1.28584e-08	1.04113e-07
Pank3	2.62514	1.29773e-08	1.05005e-07
Srr	2.24518	1.29987e-08	1.05107e-07
Adcy5	-1.79956	1.30783e-08	1.0568e-07
Psma1	1.83594	1.32731e-08	1.07182e-07
Vrk1	-1.35784	1.33166e-08	1.07461e-07
Nrp2	1.49388	1.33973e-08	1.0804e-07
Lbp	-1.81323	1.35436e-08	1.09147e-07
Stx1a	-2.31483	1.35562e-08	1.09175e-07
Mut	2.73035	1.3656e-08	1.09905e-07
Pf4	-2.59376	1.4006e-08	1.12647e-07
Pdlim2	-2.43437	1.41584e-08	1.13797e-07
Zfp553	-1.36659	1.43182e-08	1.15004e-07
Zfp280d	2.37167	1.44297e-08	1.15822e-07
Bcs1l	1.26331	1.44862e-08	1.16199e-07
Slc25a30	-1.60133	1.45096e-08	1.16309e-07
Cbll1	2.79686	1.47349e-08	1.18036e-07
Tnrc18	-2.22686	1.48813e-08	1.1913e-07
Mtm1	2.01065	1.5003e-08	1.20024e-07
Dkc1	3.03477	1.50735e-08	1.20508e-07
Rab11fip4	-1.93432	1.51341e-08	1.20912e-07
Fyn	-1.76309	1.53082e-08	1.22222e-07
Pnldc1	2.10145	1.53193e-08	1.2223e-07
Lsm3	2.05892	1.54546e-08	1.23227e-07
Tctn1	-1.41238	1.55083e-08	1.23574e-07
Slc7a6	2.02711	1.5932e-08	1.26866e-07
Cfap43	-2.15833	1.63379e-08	1.30012e-07
Scd2	1.65271	1.64138e-08	1.3053e-07
Rab37	-1.53999	1.65884e-08	1.31831e-07
Trim27	-1.42488	1.66051e-08	1.31877e-07
Zfp35	2.17409	1.66978e-08	1.32526e-07
Akap7	3.00184	1.67422e-08	1.32791e-07
Pygo2	-1.96371	1.68917e-08	1.33888e-07
Ccl8	-2.98315	1.69831e-08	1.34438e-07
Rps7	-3.38749	1.69834e-08	1.34438e-07
Fhod1	-1.57949	1.6998e-08	1.34465e-07
Zfp276	-1.61606	1.70577e-08	1.34848e-07
Ighmbp2	-1.60453	1.72189e-08	1.36034e-07
Enoph1	-1.42563	1.73217e-08	1.36756e-07
Psma6	2.14336	1.74231e-08	1.37467e-07
Ankrd28	2.04144	1.74829e-08	1.37848e-07
Hsph1	2.18993	1.76705e-08	1.39236e-07
Tmem134	-2.53102	1.7727e-08	1.3959e-07
Chtf18	-2.44341	1.78196e-08	1.40227e-07
Mypn	3.9315	1.81317e-08	1.42591e-07
Copb2	1.25421	1.90702e-08	1.49775e-07
Cd83	-2.53911	1.92326e-08	1.50952e-07
Sla2	-2.7794	1.92534e-08	1.51017e-07
Naglu	-2.02919	1.96466e-08	1.54e-07
Vsig10	-1.42927	1.98205e-08	1.55263e-07
Zkscan17	-1.29874	1.98352e-08	1.55277e-07
Osbpl6	1.89421	1.99604e-08	1.56156e-07
Vps41	1.66153	2.00323e-08	1.56616e-07
Gtpbp1	-1.39512	2.00836e-08	1.56915e-07
P3h3	-1.93547	2.03881e-08	1.59191e-07
Slc31a1	1.65844	2.04258e-08	1.59382e-07
Slco4a1	2.47541	2.04881e-08	1.59765e-07
Kcmf1	1.89535	2.06735e-08	1.61106e-07
Impa1	1.16274	2.07681e-08	1.61738e-07
Ldlr	1.25037	2.08808e-08	1.62511e-07
Trim14	-2.27863	2.10735e-08	1.63905e-07
AI597479	1.66103	2.10983e-08	1.63992e-07
Adgra3	1.32319	2.11696e-08	1.6444e-07
Parp10	-1.84022	2.13087e-08	1.65414e-07
Pnpla8	2.46427	2.14064e-08	1.66065e-07
Usb1	-1.14273	2.18768e-08	1.69605e-07
Neurl3	-2.22929	2.20419e-08	1.70668e-07
Zfp612	2.07713	2.20422e-08	1.70668e-07
Ipo8	1.31373	2.21597e-08	1.71467e-07
Cdc42	2.65572	2.22067e-08	1.71703e-07
Rara	-1.73953	2.2233e-08	1.71703e-07
Slc25a42	2.03136	2.22305e-08	1.71703e-07
Tnnc1	5.41005	2.33179e-08	1.79966e-07
Trappc6a	-3.38212	2.34428e-08	1.80815e-07
Mtmr14	-1.70634	2.36007e-08	1.81915e-07
Odf2l	2.0794	2.36381e-08	1.82087e-07
Snx14	1.86766	2.37637e-08	1.82938e-07
Vps26a	2.2634	2.40214e-08	1.84803e-07
Csk	-1.688	2.44084e-08	1.87661e-07
Mllt6	-1.54434	2.44733e-08	1.8804e-07
Hbp1	1.51735	2.48989e-08	1.91188e-07
Tmc6	-2.8172	2.4916e-08	1.91197e-07
Ciita	-2.53509	2.51077e-08	1.92546e-07
Pknox2	2.18953	2.52251e-08	1.932e-07
Tmod4	3.50776	2.52178e-08	1.932e-07
Psmb4	-2.11291	2.52956e-08	1.93616e-07
Ky	3.93764	2.53139e-08	1.93633e-07
Arhgef18	-1.37657	2.5344e-08	1.93718e-07
Tceal8	3.50877	2.53571e-08	1.93718e-07
Sptb	2.81841	2.56794e-08	1.96055e-07
Bok	-3.29605	2.57108e-08	1.96171e-07
E130012A19Rik	-3.63658	2.59418e-08	1.97808e-07
Clec11a	-2.08581	2.62281e-08	1.99865e-07
Kcnj15	3.11148	2.63425e-08	2.00609e-07
Abca8b	2.32677	2.65308e-08	2.01916e-07
Pigu	1.59985	2.65702e-08	2.02088e-07
Pfn1	-1.88094	2.66123e-08	2.0228e-07
Zfp280c	3.26741	2.6653e-08	2.02462e-07
Fgd2	-2.38671	2.67261e-08	2.02889e-07
Phldb3	-2.24479	2.69057e-08	2.04124e-07
Gpn3	-1.90279	2.69995e-08	2.04707e-07
Zfp27	1.69315	2.73457e-08	2.07201e-07
Rbm41	3.16323	2.75411e-08	2.0855e-07
Emg1	-1.59872	2.78502e-08	2.10758e-07
Rpp30	2.4377	2.79759e-08	2.11576e-07
Tmpo	-1.82919	2.80189e-08	2.11769e-07
Gnb1l	-2.4774	2.81055e-08	2.12157e-07
Pkd2l2	2.08091	2.81018e-08	2.12157e-07
Me3	3.38305	2.85597e-08	2.1545e-07
Abcc8	3.76688	2.89173e-08	2.17877e-07
Tbx15	2.23542	2.89175e-08	2.17877e-07
Kpna1	1.95478	2.94923e-08	2.22069e-07
Fam105a	-2.40635	2.97944e-08	2.24203e-07
Mecom	1.53021	3.00689e-08	2.26127e-07
Mthfsd	-1.04286	3.0161e-08	2.26678e-07
Epsti1	-2.15295	3.06355e-08	2.301e-07
Zfp961	2.3078	3.07297e-08	2.30665e-07
Lmod2	6.00299	3.09045e-08	2.31832e-07
Adck5	-2.5749	3.09403e-08	2.31956e-07
Fam186a	3.24999	3.17316e-08	2.3774e-07
Nsa2	2.08498	3.19545e-08	2.39262e-07
Sft2d3	-1.5692	3.19992e-08	2.39447e-07
Cyp51	1.67423	3.20842e-08	2.39934e-07
Dph2	-1.9322	3.23549e-08	2.41808e-07
Zpr1	-1.06139	3.24167e-08	2.4212e-07
Opa3	1.33442	3.24437e-08	2.42171e-07
Ankrd2	3.88607	3.24917e-08	2.42379e-07
Adcy7	-1.95962	3.32377e-08	2.47791e-07
Mfn2	1.45373	3.3285e-08	2.4799e-07
Ube2c	-2.25527	3.3397e-08	2.4867e-07
Sqle	1.33473	3.35127e-08	2.49378e-07
Atp4b	3.263	3.39269e-08	2.52304e-07
2410002F23Rik	-1.57717	3.4037e-08	2.52966e-07
Ppp1r9a	1.96664	3.43728e-08	2.55304e-07
Cept1	2.22589	3.45217e-08	2.56253e-07
Acadm	2.75263	3.47859e-08	2.58054e-07
Adhfe1	1.48708	3.50562e-08	2.5958e-07
Dennd6b	-1.66984	3.50512e-08	2.5958e-07
Trp53rka	-1.91277	3.50538e-08	2.5958e-07
Rps6ka1	-1.88368	3.51243e-08	2.59924e-07
Prr5l	-1.97308	3.58649e-08	2.65242e-07
Blk	-2.34487	3.59475e-08	2.65526e-07
Lyrm1	2.12724	3.5928e-08	2.65526e-07
Ccdc47	2.23251	3.60597e-08	2.66192e-07
Cyyr1	1.82453	3.66764e-08	2.70579e-07
Bmf	-1.73153	3.68089e-08	2.71389e-07
Dancr	-2.03849	3.70646e-08	2.72941e-07
Smyd1	3.51936	3.70476e-08	2.72941e-07
Sparcl1	1.68852	3.71203e-08	2.73184e-07
Pold4	-1.6687	3.72094e-08	2.73672e-07
Six4	2.9648	3.72414e-08	2.7374e-07
Cnn2	-2.19049	3.74331e-08	2.74981e-07
Lgalsl	1.77872	3.76436e-08	2.76359e-07
Adra1a	2.56902	3.77259e-08	2.76794e-07
Ly6d	-2.04954	3.79787e-08	2.78479e-07
Arhgap39	-1.53893	3.81469e-08	2.79543e-07
Clec10a	-1.73577	3.82819e-08	2.80361e-07
Zbtb48	-2.07924	3.86439e-08	2.8284e-07
Pafah1b3	-2.45902	3.9134e-08	2.86253e-07
Otulin	-2.56638	3.93293e-08	2.87508e-07
Fam26f	-2.60355	3.94142e-08	2.87953e-07
Mfsd10	-1.94558	3.97465e-08	2.90205e-07
H2-D1	-2.127	3.98394e-08	2.90707e-07
Lrrc25	-2.28717	3.99378e-08	2.91151e-07
Pde4d	2.11346	3.99546e-08	2.91151e-07
Sbk3	4.55642	3.99728e-08	2.91151e-07
Pyroxd2	-1.84705	4.00214e-08	2.91329e-07
Asah2	2.37078	4.00741e-08	2.9136e-07
Lats1	1.64937	4.00605e-08	2.9136e-07
Fam219a	-1.29091	4.02413e-08	2.92399e-07
Igfbp6	-2.40928	4.23023e-08	3.07189e-07
Ggt5	-1.84021	4.25178e-08	3.08568e-07
Ptger4	-1.9612	4.29698e-08	3.11661e-07
Rnf150	1.54676	4.31685e-08	3.12913e-07
Ttpa	2.89169	4.38586e-08	3.17724e-07
Phf1	-1.8466	4.41271e-08	3.19477e-07
Lsm11	-1.53671	4.44054e-08	3.21299e-07
C1qtnf6	-1.86441	4.5416e-08	3.28414e-07
Arrb2	-1.66494	4.55591e-08	3.2925e-07
Bpnt1	1.19796	4.64257e-08	3.35111e-07
Uevld	2.16218	4.64175e-08	3.35111e-07
2610020H08Rik	-1.74081	4.67962e-08	3.37583e-07
Dennd5a	1.238	4.6888e-08	3.38043e-07
Nrap	3.71663	4.70683e-08	3.39139e-07
Ccdc157	-1.55566	4.72144e-08	3.39989e-07
Pigx	-2.16324	4.73613e-08	3.40843e-07
Pcgf6	-1.73641	4.77021e-08	3.4309e-07
Dus4l	1.43857	4.7907e-08	3.44252e-07
Ptprf	-1.43629	4.79208e-08	3.44252e-07
Thrb	2.09359	4.82324e-08	3.46284e-07
Col5a3	-2.40568	4.84331e-08	3.47518e-07
Trim41	-1.22902	4.88131e-08	3.50035e-07
Smpd3	-2.0242	4.89314e-08	3.50675e-07
Nuak2	-2.85592	4.90498e-08	3.51314e-07
Ppp4r1l-ps	-1.64392	4.9245e-08	3.52294e-07
Tnfrsf1b	-2.01979	4.92183e-08	3.52294e-07
Deaf1	-1.27126	4.93752e-08	3.53015e-07
P4hb	-1.1213	4.95187e-08	3.53831e-07
Acsf2	1.87681	5.07113e-08	3.62138e-07
Smim1	-1.55717	5.13024e-08	3.66141e-07
Cd99l2	1.20434	5.15989e-08	3.67821e-07
Prr33	3.67667	5.1732e-08	3.68552e-07
Nfam1	-1.86075	5.20825e-08	3.7083e-07
Csrnp1	-1.91376	5.29018e-08	3.76441e-07
Naalad2	2.76767	5.34394e-08	3.79817e-07
Ptpn7	-2.03229	5.34235e-08	3.79817e-07
Rps23	-2.53003	5.35127e-08	3.80114e-07
Gm16536	2.19857	5.39938e-08	3.83305e-07
Olfr552	2.68042	5.40758e-08	3.83661e-07
Rtn3	1.6141	5.42526e-08	3.84689e-07
Senp8	3.05547	5.4465e-08	3.85854e-07
Zdhhc5	1.02528	5.44811e-08	3.85854e-07
Acsl4	2.13602	5.47107e-08	3.87252e-07
Ddx39b	-1.27757	5.47598e-08	3.87373e-07
Cxx1c	-1.84758	5.54342e-08	3.91913e-07
Gars	1.57256	5.55119e-08	3.92232e-07
Vmp1	1.65539	5.59853e-08	3.95345e-07
Spred2	1.16742	5.68874e-08	4.0148e-07
Ttc5	-1.25226	5.72148e-08	4.03553e-07
Mob3a	-1.87456	5.72995e-08	4.03915e-07
C1rl	1.38771	5.76765e-08	4.06334e-07
6720427I07Rik	4.63109	5.84079e-08	4.11246e-07
Cct4	-1.70637	5.86832e-08	4.12943e-07
Chst11	1.66163	5.87718e-08	4.13325e-07
Mir99ahg	3.32779	5.88131e-08	4.13374e-07
Eml3	-1.75624	5.91728e-08	4.1566e-07
Zfp715	2.01347	6.03686e-08	4.23812e-07
Rgs4	1.85175	6.1847e-08	4.33938e-07
Hyi	-2.55014	6.19618e-08	4.34414e-07
Pdlim5	1.51727	6.1987e-08	4.34414e-07
Coro1b	-1.31875	6.21027e-08	4.34972e-07
Ndfip1	-1.70605	6.22699e-08	4.3589e-07
Thnsl1	1.82893	6.28399e-08	4.39624e-07
Gm14698	2.99718	6.2904e-08	4.39817e-07
Shroom4	1.96786	6.33223e-08	4.42485e-07
Mthfd2	-1.52485	6.33924e-08	4.42717e-07
Arap1	-1.68279	6.46128e-08	4.50718e-07
Asph	1.74428	6.46004e-08	4.50718e-07
Mphosph10	2.76254	6.49205e-08	4.52602e-07
Arhgef40	-1.34569	6.53048e-08	4.55018e-07
Gm20427	-2.05855	6.59792e-08	4.5945e-07
Lias	1.73979	6.60538e-08	4.59704e-07
Haghl	-2.22055	6.65129e-08	4.62384e-07
Lztfl1	2.33806	6.65157e-08	4.62384e-07
Plekhg2	-1.69724	6.67484e-08	4.63734e-07
Nbeal2	-1.88445	6.78989e-08	4.71455e-07
Daglb	-1.29076	6.82591e-08	4.73683e-07
Alpk3	2.91775	6.91587e-08	4.79649e-07
Deb1	1.50892	6.96503e-08	4.8278e-07
Ip6k2	-1.67904	7.03206e-08	4.87146e-07
Hdhd2	2.0125	7.05395e-08	4.88382e-07
Igha	-6.78709	7.06391e-08	4.8879e-07
Yipf6	1.82388	7.06971e-08	4.88911e-07
Dusp14	1.99311	7.15352e-08	4.94422e-07
Pik3r5	-2.35428	7.19072e-08	4.96709e-07
Rasgrp4	-1.98495	7.20661e-08	4.97521e-07
Ppp4c	-2.11409	7.29746e-08	5.03504e-07
Mto1	1.42602	7.39816e-08	5.1016e-07
Id2	-1.67325	7.56407e-08	5.21275e-07
Slc2a9	-1.35695	7.57173e-08	5.21275e-07
Sod2	2.182	7.57234e-08	5.21275e-07
Mocs1	-1.27102	7.63042e-08	5.24973e-07
Srrd	-2.10406	7.67028e-08	5.27414e-07
B230354K17Rik	1.91513	7.74422e-08	5.32194e-07
Reep4	-1.63871	7.77808e-08	5.34216e-07
Ring1	-1.69717	7.79636e-08	5.35166e-07
Cdan1	-1.40206	7.80186e-08	5.35238e-07
Pter	1.92654	7.82374e-08	5.36434e-07
Atp5s	1.79811	7.87572e-08	5.39691e-07
Fen1	-2.17484	7.89772e-08	5.4089e-07
Stip1	2.05404	7.95338e-08	5.44393e-07
Ralgapb	1.3358	7.95935e-08	5.44492e-07
Cfap20	-1.32892	7.9723e-08	5.45068e-07
Cytip	-2.25796	8.07127e-08	5.51521e-07
Irf7	-1.87429	8.09706e-08	5.5297e-07
Socs1	-4.13413	8.14491e-08	5.55922e-07
Xrcc6bp1	-1.79667	8.16931e-08	5.57272e-07
Adgrf5	1.75297	8.22379e-08	5.60671e-07
Cd63	-1.71294	8.23264e-08	5.60956e-07
Trmt44	-1.28049	8.28328e-08	5.64087e-07
Zfhx3	1.29636	8.29718e-08	5.64714e-07
Wwp1	2.23191	8.40006e-08	5.71394e-07
Nt5c	-2.3025	8.50433e-08	5.7816e-07
Dlat	2.02108	8.55895e-08	5.81545e-07
Tmem161b	2.85453	8.57017e-08	5.81979e-07
Insr	1.47849	8.58948e-08	5.82961e-07
Tlr12	-2.73873	8.60651e-08	5.83788e-07
Arpc1a	-1.41974	8.6198e-08	5.8436e-07
Fcna	-2.41389	8.64586e-08	5.85797e-07
Fhod3	2.26989	8.78961e-08	5.95202e-07
Rpl10a	-2.10951	8.86412e-08	5.9991e-07
Lrif1	2.94308	8.89432e-08	6.01616e-07
Slc22a17	-2.11666	9.08114e-08	6.13908e-07
Ypel3	-2.21762	9.14316e-08	6.17753e-07
D730003I15Rik	-2.56458	9.16431e-08	6.18488e-07
Map4k2	-1.64805	9.16235e-08	6.18488e-07
Sel1l3	3.19666	9.17064e-08	6.18568e-07
Srm	-1.08155	9.18171e-08	6.18968e-07
Mks1	-1.69383	9.28187e-08	6.25371e-07
Tbx21	-2.26439	9.2909e-08	6.25629e-07
Snhg17	-1.77436	9.29865e-08	6.25801e-07
Rcc1	-1.93647	9.32597e-08	6.27289e-07
Sos1	2.29525	9.3786e-08	6.30476e-07
Mgat2	-1.69456	9.41171e-08	6.32349e-07
Fcrls	-1.57613	9.42503e-08	6.32891e-07
Fmo2	1.97093	9.45986e-08	6.34876e-07
Asb14	3.9328	9.46613e-08	6.34943e-07
Stx2	-1.21694	9.57524e-08	6.41904e-07
Podxl	1.88708	9.70335e-08	6.5013e-07
Ubqln4	1.06228	9.74029e-08	6.52242e-07
Fam160a1	1.99699	9.8287e-08	6.57796e-07
Myh7b	3.95097	9.87407e-08	6.60466e-07
Mxd1	-1.77547	1.0072e-07	6.72958e-07
Acox1	1.21659	1.01527e-07	6.77973e-07
Ccng2	-1.77957	1.01651e-07	6.78426e-07
Paics	1.65101	1.01922e-07	6.79859e-07
Snapc3	-1.88481	1.02142e-07	6.80945e-07
Yrdc	-1.16836	1.02872e-07	6.85433e-07
Zfp65	2.20104	1.03926e-07	6.92075e-07
Celsr1	-2.56149	1.04131e-07	6.93059e-07
Naa35	1.50601	1.06247e-07	7.06747e-07
Scoc	2.7857	1.0661e-07	7.08769e-07
Mcee	1.92023	1.07433e-07	7.1366e-07
Med28	-2.76042	1.07464e-07	7.1366e-07
Cpne1	-1.64069	1.08831e-07	7.22341e-07
Ripk3	-2.04034	1.09719e-07	7.27833e-07
Angpt1	2.97735	1.10967e-07	7.35704e-07
Egln1	2.07111	1.12756e-07	7.46822e-07
Fbxo3	1.44759	1.12768e-07	7.46822e-07
Phgdh	-2.24066	1.12859e-07	7.47018e-07
Zfp687	-1.26264	1.17176e-07	7.75167e-07
H3f3a	-1.88826	1.18338e-07	7.81564e-07
Snw1	2.07324	1.18214e-07	7.81564e-07
Usp46	1.73213	1.18332e-07	7.81564e-07
Thap3	-2.76768	1.18518e-07	7.82322e-07
Ankrd17	2.11517	1.19172e-07	7.86208e-07
Ddx39	-1.64042	1.19312e-07	7.86701e-07
Morf4l1	1.99778	1.21341e-07	7.99639e-07
Ldb3	3.33147	1.21496e-07	8.00223e-07
Psmd10	1.90908	1.22221e-07	8.04561e-07
Vps37b	-2.0973	1.22355e-07	8.05002e-07
Pim2	-1.67912	1.23219e-07	8.10243e-07
Hint3	-2.19234	1.23433e-07	8.1121e-07
Sytl4	1.78311	1.23597e-07	8.1184e-07
Tbc1d16	-1.2474	1.24461e-07	8.17075e-07
Ralgapa2	1.76187	1.24731e-07	8.18397e-07
Tbxas1	-1.96948	1.24978e-07	8.19572e-07
Asap3	-1.58542	1.25191e-07	8.2022e-07
Ppig	2.43723	1.25213e-07	8.2022e-07
Fkbp10	-1.79039	1.25797e-07	8.23596e-07
Iars	1.38847	1.26158e-07	8.25249e-07
Snn	-1.63738	1.26186e-07	8.25249e-07
Rmnd5b	-1.58614	1.27578e-07	8.33682e-07
Xpnpep3	1.84808	1.27614e-07	8.33682e-07
Ccdc102a	-1.93006	1.278e-07	8.33989e-07
Pim3	-2.30859	1.27794e-07	8.33989e-07
Txndc9	1.80066	1.31651e-07	8.58654e-07
Hoxc9	-2.08695	1.32997e-07	8.66967e-07
Tspan17	-2.02972	1.33209e-07	8.67876e-07
Tlk2	1.81967	1.33825e-07	8.71418e-07
Gltp	-1.40648	1.35122e-07	8.79386e-07
Cmya5	3.78417	1.36234e-07	8.8615e-07
Pi4k2a	-1.36731	1.36421e-07	8.86404e-07
Slc31a2	-1.4013	1.364e-07	8.86404e-07
Hsd3b7	-2.84242	1.3733e-07	8.91828e-07
Zfp81	2.7109	1.37946e-07	8.95346e-07
Ptprk	1.46602	1.38924e-07	9.01207e-07
Zfp747	-1.38207	1.40147e-07	9.08655e-07
Strn4	-1.37614	1.42871e-07	9.25819e-07
Fbxl12	-1.7536	1.43894e-07	9.31942e-07
Tigar	1.89939	1.44536e-07	9.35596e-07
Qtrt1	-1.54259	1.44828e-07	9.36985e-07
Rpl19	-1.41562	1.45496e-07	9.40804e-07
Zfyve9	1.66667	1.46331e-07	9.45691e-07
Eid1	-1.74088	1.47683e-07	9.53916e-07
Irf2bp1	-1.83102	1.5045e-07	9.71271e-07
Tnip2	-1.62801	1.51294e-07	9.76194e-07
Mad2l1bp	-1.5836	1.51501e-07	9.77009e-07
Mier2	-2.09627	1.52178e-07	9.80851e-07
Mum1	-1.81918	1.52419e-07	9.81877e-07
Ncf4	-2.23452	1.54122e-07	9.92314e-07
Scn7a	2.88693	1.54958e-07	9.97164e-07
Pisd	-1.35056	1.55396e-07	9.9945e-07
Was	-2.04417	1.55949e-07	1.00247e-06
Sh3bgr	3.81861	1.56144e-07	1.00319e-06
Taf4	-1.00797	1.5689e-07	1.00744e-06
Vim	-1.75021	1.58629e-07	1.01807e-06
Fut8	1.65445	1.5898e-07	1.01978e-06
Gimap3	-1.92014	1.60448e-07	1.02864e-06
Rhot1	1.45901	1.61623e-07	1.03563e-06
Brwd3	2.5632	1.66049e-07	1.06324e-06
Engase	-2.2158	1.66109e-07	1.06324e-06
Abcd2	2.50875	1.67174e-07	1.06949e-06
Utp6	2.12119	1.68863e-07	1.07972e-06
Arhgdig	3.96228	1.69478e-07	1.08308e-06
Zfp296	-2.32382	1.70337e-07	1.08799e-06
Cerk	-1.48474	1.70778e-07	1.09022e-06
Pcyox1l	-1.67004	1.72282e-07	1.09925e-06
Chaf1b	-2.29317	1.72392e-07	1.09937e-06
Tmem246	2.84747	1.72587e-07	1.10003e-06
Zbtb26	2.5052	1.74408e-07	1.11105e-06
Dnaja1	1.68738	1.75119e-07	1.11498e-06
Larp1b	2.08405	1.76833e-07	1.1253e-06
Man2b1	-1.45107	1.77335e-07	1.1279e-06
Atl2	1.61628	1.77969e-07	1.13133e-06
Sh3bgrl3	-1.94979	1.78448e-07	1.13378e-06
H2afx	-2.50497	1.80957e-07	1.14911e-06
Tpd52l1	3.46544	1.81347e-07	1.15099e-06
Arhgap12	1.81482	1.82859e-07	1.15936e-06
Atp5g2	3.39711	1.83145e-07	1.16056e-06
Pdcd10	2.16155	1.83611e-07	1.1629e-06
Grasp	-1.63996	1.84146e-07	1.16567e-06
Ccnb2	-1.98146	1.84363e-07	1.16644e-06
D11Wsu47e	-1.32279	1.84809e-07	1.16864e-06
Arl10	-2.27793	1.85793e-07	1.17425e-06
Lonp2	1.30227	1.85981e-07	1.17482e-06
Atxn3	1.92903	1.86618e-07	1.17823e-06
Pld4	-1.79443	1.88878e-07	1.19187e-06
Dock5	1.34413	1.9216e-07	1.21195e-06
Ankrd49	2.46601	1.93671e-07	1.2202e-06
C1d	2.09774	1.93666e-07	1.2202e-06
Sfr1	2.09051	1.94463e-07	1.22455e-06
Trmo	-1.38341	1.94888e-07	1.22658e-06
Gpr132	-2.26603	1.95137e-07	1.22751e-06
Espl1	-2.16093	1.95263e-07	1.22766e-06
Pmpca	1.18491	1.95759e-07	1.23013e-06
Ptprg	1.29859	1.96959e-07	1.23703e-06
Sytl1	-2.50228	1.97318e-07	1.23864e-06
Ppox	-1.3923	1.99115e-07	1.24862e-06
Wdr12	1.41207	1.9905e-07	1.24862e-06
4833439L19Rik	1.28952	2.00219e-07	1.25488e-06
Actr10	1.30464	2.0136e-07	1.26073e-06
Glod4	1.64779	2.01263e-07	1.26073e-06
Crat	1.51837	2.02004e-07	1.2641e-06
Cd3d	-2.06609	2.0361e-07	1.27349e-06
Emb	-1.82007	2.04414e-07	1.27785e-06
Dhdh	1.66553	2.04618e-07	1.27846e-06
Zfp638	2.2364	2.04877e-07	1.27942e-06
Zbtb49	-2.02619	2.09186e-07	1.30497e-06
Ubfd1	-1.21507	2.11085e-07	1.31614e-06
Ccdc25	2.20705	2.11387e-07	1.31731e-06
Ppp1r35	-3.88299	2.11492e-07	1.31731e-06
Pglyrp2	-2.41144	2.12478e-07	1.32277e-06
Rpain	-1.21309	2.12894e-07	1.32467e-06
Usp34	2.51368	2.14175e-07	1.33196e-06
Acaca	1.54979	2.20661e-07	1.37093e-06
Eif3g	-1.3473	2.20669e-07	1.37093e-06
Krtcap2	-1.70842	2.22628e-07	1.38238e-06
Nars	1.42208	2.23094e-07	1.38456e-06
Tgfbi	-1.30545	2.26843e-07	1.4071e-06
Gm42418	-2.57	2.29827e-07	1.42488e-06
H2afy	-1.31051	2.31053e-07	1.43174e-06
Agmo	2.92945	2.31195e-07	1.43188e-06
Gm45188	2.95903	2.33011e-07	1.44239e-06
Braf	1.80335	2.33539e-07	1.44492e-06
Pex3	1.82566	2.3922e-07	1.4793e-06
2018-09-01	-2.09387	2.39436e-07	1.47988e-06
Apln	1.69527	2.39619e-07	1.48025e-06
Trip12	1.77619	2.41072e-07	1.48846e-06
Ssfa2	1.73573	2.42561e-07	1.49689e-06
Rpp40	1.51221	2.44797e-07	1.50991e-06
Ncf1	-1.68323	2.45586e-07	1.51401e-06
Hvcn1	-1.90425	2.4706e-07	1.52231e-06
Cldn1	2.33312	2.47585e-07	1.52477e-06
Fbl	-1.46743	2.49127e-07	1.53348e-06
Itgb1bp2	3.75924	2.49885e-07	1.53736e-06
Slco3a1	-1.17673	2.50851e-07	1.54252e-06
Ikbke	-2.00607	2.51129e-07	1.54344e-06
Cp	2.77003	2.51507e-07	1.54497e-06
Gm45372	1.96546	2.51637e-07	1.54498e-06
Srxn1	1.60632	2.51856e-07	1.54554e-06
Hgh1	-2.15012	2.52448e-07	1.54838e-06
Sema4c	-1.6239	2.53215e-07	1.55229e-06
Emilin2	-1.25601	2.53419e-07	1.55276e-06
Psma4	2.25522	2.53993e-07	1.55548e-06
Taf10	-1.95395	2.55189e-07	1.56201e-06
Cacna1s	3.0889	2.55765e-07	1.56474e-06
Bcl11b	-2.28897	2.5607e-07	1.56581e-06
Mst1r	-2.11286	2.6187e-07	1.60046e-06
3110062M04Rik	-1.59446	2.62579e-07	1.60398e-06
Prtn3	-2.58112	2.63226e-07	1.60712e-06
Ttyh3	-2.05376	2.64585e-07	1.6146e-06
Tmie	-1.7895	2.65968e-07	1.62222e-06
Dnajc11	1.66695	2.66585e-07	1.62488e-06
S100a1	1.97294	2.66674e-07	1.62488e-06
Rhno1	-1.5781	2.68489e-07	1.63511e-06
Entpd2	-2.02062	2.69121e-07	1.63813e-06
Ptma	-1.67236	2.709e-07	1.64812e-06
Prdm9	2.44155	2.71388e-07	1.65026e-06
Ncf2	-2.00234	2.72448e-07	1.65587e-06
Evi5	1.8527	2.74241e-07	1.66592e-06
Rbm25	1.91628	2.74401e-07	1.66605e-06
Creld2	-1.91242	2.75301e-07	1.67067e-06
Haus2	1.49356	2.75438e-07	1.67067e-06
Bloc1s2	-1.90823	2.75879e-07	1.6725e-06
Cped1	1.97031	2.76306e-07	1.67425e-06
Arhgef9	1.8728	2.77291e-07	1.67937e-06
Calhm2	-2.0085	2.77775e-07	1.68145e-06
Prkar2b	1.70493	2.78605e-07	1.68563e-06
Mrpl48	1.32788	2.78914e-07	1.68665e-06
Eif2s3x	1.68648	2.80058e-07	1.69272e-06
Cox20	3.05255	2.80273e-07	1.69317e-06
Nlrc3	-1.90321	2.83755e-07	1.71335e-06
Plekho1	-1.58615	2.84323e-07	1.71591e-06
Gm7160	-1.40505	2.92469e-07	1.76353e-06
Nudt12	2.68581	2.92506e-07	1.76353e-06
Snrnp40	-1.22115	2.94045e-07	1.77192e-06
Pfas	-1.01618	2.94369e-07	1.77299e-06
Med13	2.4453	2.97621e-07	1.79168e-06
Gins4	-1.4448	2.98822e-07	1.79689e-06
Selenoi	1.37388	2.98698e-07	1.79689e-06
Wtip	-2.60224	2.98934e-07	1.79689e-06
Aldh3b1	-1.81945	3.00439e-07	1.80503e-06
Serinc2	3.50837	3.00821e-07	1.80642e-06
Adam8	-2.18	3.02803e-07	1.81742e-06
Kcnj11	3.82181	3.05298e-07	1.83148e-06
[truncated: 3,267 more rows]
